# Supplementary material
Source: publisher figshare collection journal article supplement (https://gsajournals.figshare.com/ndownloader/files/14243786)
Supplement: Supplementary file 1 [file 14243786]

## Sheet: Table S2
	Table S2: Functional annotation of Carménère genome. Genes identified as putative private genes are indicated.
	Transcript ID	Locus	Private loci	Description	GOs	GOs description	ECs	Ecs description	Interpro Ids	Interpro GOs	Interpro GOs description
	VvCarFPS02VCR702_v1_PsGc_0.ver1_0.g000100.m01	VvCarFPS02VCR702_v1_PsGc_0.ver1_0.g000100	0	mitogen-activated kinase 17 isoform X2	0	0	0	0	SignalP-noTM (SIGNALP_EUK)	no GO terms	no GO terms
	VvCarFPS02VCR702_v1_PsGc_0.ver1_0.g000110.m01	VvCarFPS02VCR702_v1_PsGc_0.ver1_0.g000110	0	60S ribosomal L4	F:GO:0005198 | C:GO:0005840 | P:GO:0006412	F:structural molecule activity | C:ribosome | P:translation	0	0	IPR023574 (G3DSA:3.40.1370.GENE3D) | PTHR19431 (PANTHER) | IPR023574 (SUPERFAMILY)	F:GO:0003735 | C:GO:0005840 | P:GO:0006412	F:structural constituent of ribosome	P:translation
	VvCarFPS02VCR702_v1_PsGc_0.ver1_0.g000120.m01	VvCarFPS02VCR702_v1_PsGc_0.ver1_0.g000120	0	nuclear factor kappa-B-binding	C:GO:0005634	C:nucleus	0	0	PTHR13052:SF1 (PANTHER) | IPR024867 (PANTHER)	C:GO:0031011	C:Ino80 complex
	VvCarFPS02VCR702_v1_PsGc_0.ver1_0.g000130.m01	VvCarFPS02VCR702_v1_PsGc_0.ver1_0.g000130	0	hypothetical protein POPTR_0013s04080g	0	0	0	0	PTHR33592 (PANTHER) | SignalP-noTM (SIGNALP_EUK)	no GO terms	no GO terms
	VvCarFPS02VCR702_v1_PsGc_0.ver1_0.g000140.m01	VvCarFPS02VCR702_v1_PsGc_0.ver1_0.g000140	0	hypothetical protein POPTR_0001s38930g	0	0	0	0	PTHR33592:SF2 (PANTHER) | PTHR33592 (PANTHER) | SignalP-noTM (SIGNALP_EUK) | TMhelix (TMHMM)	no GO terms	no GO terms
	VvCarFPS02VCR702_v1_PsGc_0.ver1_0.g000150.m01	VvCarFPS02VCR702_v1_PsGc_0.ver1_0.g000150	0	nuclear factor kappa-B-binding	C:GO:0005634	C:nucleus	0	0	PTHR13052:SF1 (PANTHER) | IPR024867 (PANTHER)	C:GO:0031011	C:Ino80 complex
	VvCarFPS02VCR702_v1_PsGc_0.ver1_0.g000160.m01	VvCarFPS02VCR702_v1_PsGc_0.ver1_0.g000160	0	hypothetical protein POPTR_0001s38930g	0	0	0	0	PTHR33592:SF2 (PANTHER) | PTHR33592 (PANTHER) | SignalP-noTM (SIGNALP_EUK) | TMhelix (TMHMM)	no GO terms	no GO terms
	VvCarFPS02VCR702_v1_PsGc_0.ver1_0.g000170.m01	VvCarFPS02VCR702_v1_PsGc_0.ver1_0.g000170	0	cysteine-rich RECEPTOR-like kinase	0	0	0	0	IPR013103 (PFAM) | mobidb-lite (MOBIDB_LITE) | PTHR11439:SF204 (PANTHER) | PTHR11439 (PANTHER) | cd09272 (CDD) | SSF56672 (SUPERFAMILY)	no GO terms	no GO terms
	VvCarFPS02VCR702_v1_PsGc_0.ver1_0.g000180.m01	VvCarFPS02VCR702_v1_PsGc_0.ver1_0.g000180	0	evolutionarily conserved C-terminal region 4	0	0	0	0	PTHR12357:SF63 (PANTHER) | PTHR12357 (PANTHER)	no GO terms	no GO terms
	VvCarFPS02VCR702_v1_PsGc_0.ver1_0.g000190.m01	VvCarFPS02VCR702_v1_PsGc_0.ver1_0.g000190	0	GRF1-interacting factor 1-like isoform X1	P:GO:0009058 | P:GO:0006139 | F:GO:0003674 | C:GO:0005622	P:biosynthetic process | P:nucleobase-containing compound metabolic process | F:molecular_function | C:intracellular	0	0	IPR007726 (PFAM) | mobidb-lite (MOBIDB_LITE) | PTHR23107 (PANTHER) | PTHR23107:SF15 (PANTHER)	F:GO:0003713	F:transcription coactivator activity
	VvCarFPS02VCR702_v1_PsGc_0.ver1_0.g000200.m01	VvCarFPS02VCR702_v1_PsGc_0.ver1_0.g000200	0	F-box kelch-repeat SKIP30	F:GO:0005515 | C:GO:0005622	F:protein binding | C:intracellular	0	0	IPR006652 (SMART) | IPR006652 (PFAM) | IPR015915 (G3DSA:2.120.10.GENE3D) | PTHR24412 (PANTHER) | PTHR24412:SF213 (PANTHER) | IPR036047 (SUPERFAMILY) | IPR015915 (SUPERFAMILY)	F:GO:0005515	F:protein binding
	VvCarFPS02VCR702_v1_PsGc_0.ver1_0.g000210.m01	VvCarFPS02VCR702_v1_PsGc_0.ver1_0.g000210	0	Myosin family with Dil domain-containing	F:GO:0000166 | C:GO:0005856 | F:GO:0005515 | P:GO:0044763 | P:GO:0009987 | F:GO:0003774	F:nucleotide binding | C:cytoskeleton | F:protein binding | P:single-organism cellular process | P:cellular process | F:motor activity	EC:3.6.1.15	Nucleoside-triphosphate phosphatase	Coil (COILS) | Coil (COILS) | IPR001609 (PRINTS) | IPR000048 (SMART) | IPR001609 (SMART) | IPR036961 (G3DSA:3.40.850.GENE3D) | G3DSA:1.10.10.820 (GENE3D) | IPR001609 (PFAM) | G3DSA:1.20.58.530 (GENE3D) | G3DSA:3.30.70.3240 (GENE3D) | IPR000048 (PFAM) | G3DSA:1.20.5.190 (GENE3D) | G3DSA:1.20.120.720 (GENE3D) | PTHR13140:SF652 (PANTHER) | PTHR13140 (PANTHER) | IPR001609 (PROSITE_PROFILES) | IPR0000…	F:GO:0005524 | C:GO:0016459 | F:GO:0003777 | F:GO:0005515 | P:GO:0007018 | F:GO:0003774 | F:GO:0008017	F:ATP binding	F:microtubule motor activity	F:protein binding	P:microtubule-based movement	F:motor activity	F:microtubule binding
	VvCarFPS02VCR702_v1_PsGc_0.ver1_0.g000220.m01	VvCarFPS02VCR702_v1_PsGc_0.ver1_0.g000220	0	transcriptional regulator SUPERMAN-like	F:GO:0003676 | C:GO:0005634	F:nucleic acid binding | C:nucleus	0	0	G3DSA:3.30.160.60 (GENE3D) | PF13912 (PFAM) | mobidb-lite (MOBIDB_LITE) | PTHR26374:SF248 (PANTHER) | PTHR26374 (PANTHER) | IPR013087 (PROSITE_PATTERNS) | IPR013087 (PROSITE_PROFILES) | IPR036236 (SUPERFAMILY)	F:GO:0003676	F:nucleic acid binding
	VvCarFPS02VCR702_v1_PsGc_0.ver1_0.g000230.m01	VvCarFPS02VCR702_v1_PsGc_0.ver1_0.g000230	0	transcriptional regulator SUPERMAN-like	F:GO:0003676	F:nucleic acid binding	0	0	mobidb-lite (MOBIDB_LITE) | mobidb-lite (MOBIDB_LITE) | mobidb-lite (MOBIDB_LITE) | PTHR26374:SF211 (PANTHER) | PTHR26374 (PANTHER) | IPR013087 (PROSITE_PATTERNS) | IPR013087 (PROSITE_PROFILES) | IPR036236 (SUPERFAMILY)	F:GO:0003676	F:nucleic acid binding
	VvCarFPS02VCR702_v1_PsGc_0.ver1_0.g000240.m01	VvCarFPS02VCR702_v1_PsGc_0.ver1_0.g000240	0	Bet1-like SNARE 1-1	C:GO:0016020	C:membrane	0	0	G3DSA:1.20.5.110 (GENE3D) | PTHR12791:SF38 (PANTHER) | PTHR12791 (PANTHER) | IPR000727 (PROSITE_PROFILES) | cd15853 (CDD) | SSF58038 (SUPERFAMILY) | TMhelix (TMHMM)	no GO terms	no GO terms
	VvCarFPS02VCR702_v1_PsGc_0.ver1_0.g000250.m01	VvCarFPS02VCR702_v1_PsGc_0.ver1_0.g000250	0	lipase class 3 family	P:GO:0006629 | F:GO:0016787	P:lipid metabolic process | F:hydrolase activity	0	0	IPR002921 (PFAM) | IPR029058 (G3DSA:3.40.50.GENE3D) | mobidb-lite (MOBIDB_LITE) | PTHR21493 (PANTHER) | PTHR21493:SF164 (PANTHER) | cd00519 (CDD) | IPR029058 (SUPERFAMILY)	P:GO:0006629	P:lipid metabolic process
	VvCarFPS02VCR702_v1_PsGc_0.ver1_0.g000260.m01	VvCarFPS02VCR702_v1_PsGc_0.ver1_0.g000260	0	LOB domain-containing 29-like	C:GO:0005634	C:nucleus	0	0	Coil (COILS) | IPR004883 (PFAM) | PTHR31529:SF2 (PANTHER) | PTHR31529 (PANTHER) | IPR004883 (PROSITE_PROFILES)	no GO terms	no GO terms
	VvCarFPS02VCR702_v1_PsGc_0.ver1_0.g000270.m01	VvCarFPS02VCR702_v1_PsGc_0.ver1_0.g000270	0	LOB domain-containing 29-like	C:GO:0005634	C:nucleus	0	0	Coil (COILS) | IPR004883 (PFAM) | IPR004883 (PROSITE_PROFILES)	no GO terms	no GO terms
	VvCarFPS02VCR702_v1_PsGc_0.ver1_0.g000280.m01	VvCarFPS02VCR702_v1_PsGc_0.ver1_0.g000280	0	poly(ADP-ribose) polymerase	F:GO:0016740	F:transferase activity	EC:2.4.2.30	NAD(+) ADP-ribosyltransferase	IPR012317 (PFAM) | G3DSA:3.90.228.10 (GENE3D) | PTHR10459 (PANTHER) | PTHR10459:SF80 (PANTHER) | IPR012317 (PROSITE_PROFILES) | cd01437 (CDD) | SSF56399 (SUPERFAMILY)	F:GO:0003950	F:NAD+ ADP-ribosyltransferase activity
	VvCarFPS02VCR702_v1_PsGc_0.ver1_0.g000290.m01	VvCarFPS02VCR702_v1_PsGc_0.ver1_0.g000290	0	poly [ADP-ribose] polymerase 3	F:GO:0003677 | C:GO:0005737 | P:GO:0006464 | P:GO:0009058 | F:GO:0016740	F:DNA binding | C:cytoplasm | P:cellular protein modification process | P:biosynthetic process | F:transferase activity	EC:2.4.2.30	NAD(+) ADP-ribosyltransferase	Coil (COILS) | IPR012982 (SMART) | IPR008893 (SMART) | IPR001357 (SMART) | IPR001510 (SMART) | IPR036957 (G3DSA:3.30.1740.GENE3D) | G3DSA:1.10.20.130 (GENE3D) | IPR036930 (G3DSA:2.20.140.GENE3D) | IPR008893 (PFAM) | IPR001510 (PFAM) | IPR001357 (PFAM) | IPR012982 (PFAM) | IPR036420 (G3DSA:3.40.50.GENE3D) | IPR004102 (PFAM) | IPR036616 (G3DSA:1.20.142.GENE3D) | IPR038650 (G3DSA:2.20.25.GENE3D) | m…	F:GO:0003677 | F:GO:0008270 | P:GO:0006471 | F:GO:0003950	F:DNA binding	P:protein ADP-ribosylation	F:NAD+ ADP-ribosyltransferase activity
	VvCarFPS02VCR702_v1_PsGc_0.ver1_0.g000300.m01	VvCarFPS02VCR702_v1_PsGc_0.ver1_0.g000300	0	deoxyhypusine hydroxylase	F:GO:0003824 | P:GO:0006464 | P:GO:0009058 | F:GO:0005488	F:catalytic activity | P:cellular protein modification process | P:biosynthetic process | F:binding	EC:1.14.99.29	Deoxyhypusine monooxygenase	Coil (COILS) | IPR004155 (SMART) | PF13646 (PFAM) | IPR011989 (G3DSA:1.25.10.GENE3D) | PTHR12697 (PANTHER) | PTHR12697:SF5 (PANTHER) | IPR027517 (HAMAP) | IPR016024 (SUPERFAMILY)	F:GO:0019135 | F:GO:0005488 | P:GO:0008612	F:deoxyhypusine monooxygenase activity	P:peptidyl-lysine modification to peptidyl-hypusine
	VvCarFPS02VCR702_v1_PsGc_0.ver1_0.g000310.m01	VvCarFPS02VCR702_v1_PsGc_0.ver1_0.g000310	0	1-aminocyclopropane-1-carboxylate oxidase	F:GO:0003824 | P:GO:0008152 | F:GO:0005488 | P:GO:0044710	F:catalytic activity | P:metabolic process | F:binding | P:single-organism metabolic process	0	0	IPR026992 (PFAM) | IPR027443 (G3DSA:2.60.120.GENE3D) | IPR005123 (PFAM) | PTHR10209 (PANTHER) | PTHR10209:SF227 (PANTHER) | IPR005123 (PROSITE_PROFILES) | SSF51197 (SUPERFAMILY)	F:GO:0016491 | P:GO:0055114	F:oxidoreductase activity
	VvCarFPS02VCR702_v1_PsGc_0.ver1_0.g000320.m01	VvCarFPS02VCR702_v1_PsGc_0.ver1_0.g000320	0	bHLH transcription factor	F:GO:0005515 | C:GO:0005829	F:protein binding | C:cytosol	0	0	IPR025610 (PFAM) | mobidb-lite (MOBIDB_LITE) | PTHR13902 (PANTHER) | PTHR13902:SF55 (PANTHER) | IPR011598 (PROSITE_PROFILES) | IPR011598 (CDD) | IPR036638 (SUPERFAMILY)	F:GO:0046983	F:protein dimerization activity
	VvCarFPS02VCR702_v1_PsGc_0.ver1_0.g000330.m01	VvCarFPS02VCR702_v1_PsGc_0.ver1_0.g000330	0	hypothetical protein PRUPE_ppa016902mg, partial	0	0	0	0	mobidb-lite (MOBIDB_LITE) | mobidb-lite (MOBIDB_LITE)	no GO terms	no GO terms
	VvCarFPS02VCR702_v1_PsGc_0.ver1_0.g000340.m01	VvCarFPS02VCR702_v1_PsGc_0.ver1_0.g000340	0	auxin-induced 5NG4	C:GO:0016020 | F:GO:0005215	C:membrane | F:transporter activity	0	0	IPR000620 (PFAM) | mobidb-lite (MOBIDB_LITE) | PTHR31218:SF46 (PANTHER) | IPR030184 (PANTHER) | SSF103481 (SUPERFAMILY) | SSF103481 (SUPERFAMILY) | TMhelix (TMHMM) | TMhelix (TMHMM) | TMhelix (TMHMM) | TMhelix (TMHMM) | TMhelix (TMHMM) | TMhelix (TMHMM) | TMhelix (TMHMM) | TMhelix (TMHMM) | TMhelix (TMHMM) | TMhelix (TMHMM)	F:GO:0022857 | C:GO:0016020 | C:GO:0016021	F:transmembrane transporter activity	C:integral component of membrane
	VvCarFPS02VCR702_v1_PsGc_0.ver1_0.g000350.m01	VvCarFPS02VCR702_v1_PsGc_0.ver1_0.g000350	0	CDT1 chloroplastic	0	0	0	0	IPR014939 (SMART) | G3DSA:1.10.10.1420 (GENE3D) | IPR032054 (PFAM) | IPR014939 (PFAM) | mobidb-lite (MOBIDB_LITE) | mobidb-lite (MOBIDB_LITE) | mobidb-lite (MOBIDB_LITE) | mobidb-lite (MOBIDB_LITE) | mobidb-lite (MOBIDB_LITE) | PTHR28637 (PANTHER) | PTHR28637:SF5 (PANTHER) | cd08674 (CDD) | cd08767 (CDD) | IPR036390 (SUPERFAMILY)	no GO terms	no GO terms
	VvCarFPS02VCR702_v1_PsGc_0.ver1_0.g000360.m01	VvCarFPS02VCR702_v1_PsGc_0.ver1_0.g000360	0	autophagy-related 9	C:GO:0005773	C:vacuole	0	0	IPR007241 (PFAM) | mobidb-lite (MOBIDB_LITE) | PTHR13038:SF16 (PANTHER) | IPR007241 (PANTHER) | TMhelix (TMHMM) | TMhelix (TMHMM)	no GO terms	no GO terms
	VvCarFPS02VCR702_v1_PsGc_0.ver1_0.g000370.m01	VvCarFPS02VCR702_v1_PsGc_0.ver1_0.g000370	0	autophagy-related 9	0	0	0	0	IPR007241 (PFAM) | IPR007241 (PANTHER) | PTHR13038:SF16 (PANTHER) | SignalP-noTM (SIGNALP_EUK)	no GO terms	no GO terms
	VvCarFPS02VCR702_v1_PsGc_0.ver1_0.g000380.m01	VvCarFPS02VCR702_v1_PsGc_0.ver1_0.g000380	0	KINESIN LIGHT CHAIN-RELATED 1	0	0	0	0	mobidb-lite (MOBIDB_LITE)	no GO terms	no GO terms
	VvCarFPS02VCR702_v1_PsGc_0.ver1_0.g000390.m01	VvCarFPS02VCR702_v1_PsGc_0.ver1_0.g000390	0	KINESIN LIGHT CHAIN-RELATED 1-like	F:GO:0005515	F:protein binding	0	0	Coil (COILS) | PTHR19959:SF168 (PANTHER) | PTHR19959 (PANTHER) | IPR013026 (PROSITE_PROFILES) | IPR019734 (PROSITE_PROFILES)	F:GO:0005515	F:protein binding
	VvCarFPS02VCR702_v1_PsGc_0.ver1_0.g000400.m01	VvCarFPS02VCR702_v1_PsGc_0.ver1_0.g000400	0	RING-H2 finger ATL1-like	C:GO:0016020	C:membrane	0	0	IPR001841 (SMART) | IPR001841 (PFAM) | IPR013083 (G3DSA:3.30.40.GENE3D) | PTHR14155 (PANTHER) | PTHR14155:SF265 (PANTHER) | IPR001841 (PROSITE_PROFILES) | cd16454 (CDD) | SSF57850 (SUPERFAMILY) | TMhelix (TMHMM)	no GO terms	no GO terms
	VvCarFPS02VCR702_v1_PsGc_0.ver1_0.g000410.m01	VvCarFPS02VCR702_v1_PsGc_0.ver1_0.g000410	0	aspartic ase nepenthesin-1-like	P:GO:0019538 | F:GO:0016787	P:protein metabolic process | F:hydrolase activity	EC:3.4.23	Acting on peptide bonds (peptidases)	Coil (COILS) | IPR001461 (PRINTS) | IPR032861 (PFAM) | IPR032799 (PFAM) | IPR021109 (G3DSA:2.40.70.GENE3D) | IPR021109 (G3DSA:2.40.70.GENE3D) | IPR001461 (PANTHER) | PTHR13683:SF223 (PANTHER) | IPR001969 (PROSITE_PATTERNS) | IPR033121 (PROSITE_PROFILES) | IPR034161 (CDD) | SignalP-TM (SIGNALP_GRAM_POSITIVE) | SignalP-noTM (SIGNALP_EUK) | IPR021109 (SUPERFAMILY) | TMhelix (TMHMM)	F:GO:0004190 | P:GO:0006508	F:aspartic-type endopeptidase activity
	VvCarFPS02VCR702_v1_PsGc_0.ver1_0.g000420.m01	VvCarFPS02VCR702_v1_PsGc_0.ver1_0.g000420	0	Hyoscyamine 6-dioxygenase	F:GO:0003824	F:catalytic activity	0	0	IPR027443 (G3DSA:2.60.120.GENE3D) | PTHR10209 (PANTHER) | PTHR10209:SF124 (PANTHER) | SignalP-noTM (SIGNALP_EUK) | SSF51197 (SUPERFAMILY) | TMhelix (TMHMM)	no GO terms	no GO terms
	VvCarFPS02VCR702_v1_PsGc_0.ver1_0.g000430.m01	VvCarFPS02VCR702_v1_PsGc_0.ver1_0.g000430	0	dehydrodolichyl diphosphate synthase 6-like	F:GO:0016740	F:transferase activity	0	0	IPR001441 (PFAM) | IPR036424 (G3DSA:3.40.1180.GENE3D) | IPR001441 (PANTHER) | PTHR10291:SF12 (PANTHER) | IPR036424 (SUPERFAMILY)	F:GO:0016765	F:transferase activity, transferring alkyl or aryl (other than methyl) groups
	VvCarFPS02VCR702_v1_PsGc_0.ver1_0.g000440.m01	VvCarFPS02VCR702_v1_PsGc_0.ver1_0.g000440	0	dehydrodolichyl diphosphate synthase 6-like	F:GO:0016740	F:transferase activity	0	0	IPR001441 (PFAM) | IPR036424 (G3DSA:3.40.1180.GENE3D) | IPR001441 (PANTHER) | PTHR10291:SF12 (PANTHER) | IPR018520 (PROSITE_PATTERNS) | SignalP-TM (SIGNALP_GRAM_POSITIVE) | IPR036424 (SUPERFAMILY)	F:GO:0016765	F:transferase activity, transferring alkyl or aryl (other than methyl) groups
	VvCarFPS02VCR702_v1_PsGc_0.ver1_0.g000450.m01	VvCarFPS02VCR702_v1_PsGc_0.ver1_0.g000450	0	ethylene-responsive transcription factor ERF098-like	C:GO:0005634 | F:GO:0003677 | F:GO:0003700 | P:GO:0009058 | P:GO:0006139	C:nucleus | F:DNA binding | F:transcription factor activity, sequence-specific DNA binding | P:biosynthetic process | P:nucleobase-containing compound metabolic process	0	0	IPR001471 (SMART) | IPR001471 (PFAM) | IPR017392 (PIRSF) | IPR036955 (G3DSA:3.30.730.GENE3D) | mobidb-lite (MOBIDB_LITE) | PTHR31190 (PANTHER) | PTHR31190:SF71 (PANTHER) | IPR001471 (PROSITE_PROFILES) | IPR016177 (SUPERFAMILY)	F:GO:0003677 | F:GO:0003700 | P:GO:0006355	F:DNA binding	P:regulation of transcription, DNA-templated
	VvCarFPS02VCR702_v1_PsGc_0.ver1_0.g000460.m01	VvCarFPS02VCR702_v1_PsGc_0.ver1_0.g000460	0	ethylene-responsive transcription factor ERF098-like	C:GO:0005634 | F:GO:0003677 | F:GO:0003700 | P:GO:0009058 | P:GO:0006139	C:nucleus | F:DNA binding | F:transcription factor activity, sequence-specific DNA binding | P:biosynthetic process | P:nucleobase-containing compound metabolic process	0	0	IPR001471 (PRINTS) | IPR001471 (SMART) | IPR001471 (PFAM) | IPR017392 (PIRSF) | IPR036955 (G3DSA:3.30.730.GENE3D) | PTHR31190 (PANTHER) | PTHR31190:SF71 (PANTHER) | IPR001471 (PROSITE_PROFILES) | IPR001471 (CDD) | IPR016177 (SUPERFAMILY)	F:GO:0003677 | F:GO:0003700 | P:GO:0006355	F:DNA binding	P:regulation of transcription, DNA-templated
	VvCarFPS02VCR702_v1_PsGc_0.ver1_0.g000470.m01	VvCarFPS02VCR702_v1_PsGc_0.ver1_0.g000470	0	ethylene-responsive transcription factor ERF098-like	C:GO:0005634 | F:GO:0003677 | F:GO:0003700 | P:GO:0009058 | P:GO:0006139	C:nucleus | F:DNA binding | F:transcription factor activity, sequence-specific DNA binding | P:biosynthetic process | P:nucleobase-containing compound metabolic process	0	0	IPR001471 (PRINTS) | IPR001471 (SMART) | IPR017392 (PIRSF) | IPR001471 (PFAM) | IPR036955 (G3DSA:3.30.730.GENE3D) | mobidb-lite (MOBIDB_LITE) | PTHR31190:SF68 (PANTHER) | PTHR31190 (PANTHER) | IPR001471 (PROSITE_PROFILES) | IPR001471 (CDD) | IPR016177 (SUPERFAMILY)	F:GO:0003677 | F:GO:0003700 | P:GO:0006355	F:DNA binding	P:regulation of transcription, DNA-templated
	VvCarFPS02VCR702_v1_PsGc_0.ver1_0.g000480.m01	VvCarFPS02VCR702_v1_PsGc_0.ver1_0.g000480	0	ethylene-responsive transcription factor ERF098-like	C:GO:0005634 | F:GO:0003677 | F:GO:0003700 | P:GO:0009058 | P:GO:0006139	C:nucleus | F:DNA binding | F:transcription factor activity, sequence-specific DNA binding | P:biosynthetic process | P:nucleobase-containing compound metabolic process	0	0	IPR001471 (PRINTS) | IPR001471 (SMART) | IPR036955 (G3DSA:3.30.730.GENE3D) | IPR001471 (PFAM) | IPR017392 (PIRSF) | mobidb-lite (MOBIDB_LITE) | PTHR31190 (PANTHER) | PTHR31190:SF60 (PANTHER) | IPR001471 (PROSITE_PROFILES) | IPR001471 (CDD) | IPR016177 (SUPERFAMILY)	F:GO:0003677 | F:GO:0003700 | P:GO:0006355	F:DNA binding	P:regulation of transcription, DNA-templated
	VvCarFPS02VCR702_v1_PsGc_0.ver1_0.g000490.m01	VvCarFPS02VCR702_v1_PsGc_0.ver1_0.g000490	0	ethylene-responsive transcription factor 1B-like	C:GO:0005634 | F:GO:0003677 | F:GO:0003700 | P:GO:0009058 | P:GO:0006139	C:nucleus | F:DNA binding | F:transcription factor activity, sequence-specific DNA binding | P:biosynthetic process | P:nucleobase-containing compound metabolic process	0	0	IPR001471 (PRINTS) | IPR001471 (SMART) | IPR001471 (PFAM) | IPR036955 (G3DSA:3.30.730.GENE3D) | mobidb-lite (MOBIDB_LITE) | mobidb-lite (MOBIDB_LITE) | PTHR31190 (PANTHER) | PTHR31190:SF35 (PANTHER) | IPR001471 (PROSITE_PROFILES) | IPR001471 (CDD) | IPR016177 (SUPERFAMILY)	F:GO:0003677 | F:GO:0003700 | P:GO:0006355	F:DNA binding	P:regulation of transcription, DNA-templated
	VvCarFPS02VCR702_v1_PsGc_0.ver1_0.g000500.m01	VvCarFPS02VCR702_v1_PsGc_0.ver1_0.g000500	0	ethylene-responsive transcription factor 1B-like	C:GO:0005634 | F:GO:0003677 | F:GO:0003700 | P:GO:0009058 | P:GO:0006139	C:nucleus | F:DNA binding | F:transcription factor activity, sequence-specific DNA binding | P:biosynthetic process | P:nucleobase-containing compound metabolic process	0	0	IPR001471 (PRINTS) | IPR001471 (SMART) | IPR001471 (PFAM) | IPR036955 (G3DSA:3.30.730.GENE3D) | mobidb-lite (MOBIDB_LITE) | PTHR31190:SF35 (PANTHER) | PTHR31190 (PANTHER) | IPR001471 (PROSITE_PROFILES) | IPR001471 (CDD) | IPR016177 (SUPERFAMILY)	F:GO:0003677 | F:GO:0003700 | P:GO:0006355	F:DNA binding	P:regulation of transcription, DNA-templated
	VvCarFPS02VCR702_v1_PsGc_0.ver1_0.g000510.m01	VvCarFPS02VCR702_v1_PsGc_0.ver1_0.g000510	0	ethylene-responsive transcription factor 1B-like	C:GO:0005634 | F:GO:0003677 | F:GO:0003700 | P:GO:0009058 | P:GO:0006139	C:nucleus | F:DNA binding | F:transcription factor activity, sequence-specific DNA binding | P:biosynthetic process | P:nucleobase-containing compound metabolic process	0	0	IPR001471 (PRINTS) | IPR001471 (SMART) | IPR001471 (PFAM) | IPR036955 (G3DSA:3.30.730.GENE3D) | mobidb-lite (MOBIDB_LITE) | mobidb-lite (MOBIDB_LITE) | PTHR31190 (PANTHER) | PTHR31190:SF71 (PANTHER) | IPR001471 (PROSITE_PROFILES) | IPR001471 (CDD) | IPR016177 (SUPERFAMILY)	F:GO:0003677 | F:GO:0003700 | P:GO:0006355	F:DNA binding	P:regulation of transcription, DNA-templated
	VvCarFPS02VCR702_v1_PsGc_0.ver1_0.g000520.m01	VvCarFPS02VCR702_v1_PsGc_0.ver1_0.g000520	0	inorganic phosphate transporter 1-4-like	C:GO:0016020	C:membrane	0	0	G3DSA:1.20.1250.20 (GENE3D) | PTHR24064 (PANTHER) | PTHR24064:SF341 (PANTHER) | TMhelix (TMHMM)	no GO terms	no GO terms
	VvCarFPS02VCR702_v1_PsGc_0.ver1_0.g000530.m01	VvCarFPS02VCR702_v1_PsGc_0.ver1_0.g000530	0	probable inorganic phosphate transporter 1-3	C:GO:0016020 | P:GO:0006810 | F:GO:0005215	C:membrane | P:transport | F:transporter activity	0	0	IPR005828 (PFAM) | G3DSA:1.20.1250.20 (GENE3D) | PTHR24064 (PANTHER) | PTHR24064:SF331 (PANTHER) | IPR036259 (SUPERFAMILY) | TMhelix (TMHMM) | TMhelix (TMHMM)	P:GO:0055085 | F:GO:0022857 | C:GO:0016021	P:transmembrane transport	C:integral component of membrane
	VvCarFPS02VCR702_v1_PsGc_0.ver1_0.g000540.m01	VvCarFPS02VCR702_v1_PsGc_0.ver1_0.g000540	0	phosphate transporter 1 4	0	0	0	0	no IPS match	no IPS match	no IPS match
	VvCarFPS02VCR702_v1_PsGc_0.ver1_0.g000550.m01	VvCarFPS02VCR702_v1_PsGc_0.ver1_0.g000550	0	high affinity inorganic phosphate transporter	0	0	0	0	G3DSA:1.20.1250.20 (GENE3D) | PTHR24064:SF414 (PANTHER) | PTHR24064 (PANTHER) | TMhelix (TMHMM) | TMhelix (TMHMM)	no GO terms	no GO terms
	VvCarFPS02VCR702_v1_PsGc_0.ver1_0.g000560.m01	VvCarFPS02VCR702_v1_PsGc_0.ver1_0.g000560	0	inorganic phosphate transporter 1-4-like	C:GO:0016020 | P:GO:0006810 | F:GO:0005215	C:membrane | P:transport | F:transporter activity	0	0	G3DSA:1.20.1250.20 (GENE3D) | IPR005828 (PFAM) | PTHR24064 (PANTHER) | PTHR24064:SF341 (PANTHER) | IPR020846 (PROSITE_PROFILES) | IPR020846 (CDD) | IPR036259 (SUPERFAMILY) | TMhelix (TMHMM) | TMhelix (TMHMM) | TMhelix (TMHMM) | TMhelix (TMHMM) | TMhelix (TMHMM) | TMhelix (TMHMM)	P:GO:0055085 | F:GO:0022857 | C:GO:0016021	P:transmembrane transport	C:integral component of membrane
	VvCarFPS02VCR702_v1_PsGc_0.ver1_0.g000570.m01	VvCarFPS02VCR702_v1_PsGc_0.ver1_0.g000570	0	histone acetyltransferase subunit 4-domain	0	0	0	0	Coil (COILS) | PTHR13476:SF2 (PANTHER) | PTHR13476:SF2 (PANTHER) | PTHR13476 (PANTHER) | PTHR13476 (PANTHER)	no GO terms	no GO terms
	VvCarFPS02VCR702_v1_PsGc_0.ver1_0.g000580.m01	VvCarFPS02VCR702_v1_PsGc_0.ver1_0.g000580	0	root UVB sensitive chloroplastic	C:GO:0009536	C:plastid	0	0	IPR006968 (PFAM) | PTHR12770:SF5 (PANTHER) | IPR006968 (PANTHER)	no GO terms	no GO terms
	VvCarFPS02VCR702_v1_PsGc_0.ver1_0.g000590.m01	VvCarFPS02VCR702_v1_PsGc_0.ver1_0.g000590	0	myb-related Myb4-like	F:GO:0003677	F:DNA binding	0	0	IPR001005 (SMART) | IPR001005 (PFAM) | G3DSA:1.10.10.60 (GENE3D) | G3DSA:1.10.10.60 (GENE3D) | mobidb-lite (MOBIDB_LITE) | PTHR10641 (PANTHER) | PTHR10641:SF954 (PANTHER) | IPR017930 (PROSITE_PROFILES) | IPR017930 (PROSITE_PROFILES) | IPR001005 (CDD) | IPR009057 (SUPERFAMILY)	F:GO:0003677	F:DNA binding
	VvCarFPS02VCR702_v1_PsGc_0.ver1_0.g000600.m01	VvCarFPS02VCR702_v1_PsGc_0.ver1_0.g000600	0	Malate dehydrogenase	P:GO:0005975 | P:GO:0006091 | F:GO:0003824	P:carbohydrate metabolic process | P:generation of precursor metabolites and energy | F:catalytic activity	EC:1.1.1.37	Malate dehydrogenase	G3DSA:3.40.50.720 (GENE3D) | IPR015955 (G3DSA:3.90.110.GENE3D) | IPR022383 (PFAM) | IPR011274 (TIGRFAM) | IPR001236 (PFAM) | IPR001557 (PIRSF) | IPR010945 (TIGRFAM) | PTHR23382:SF7 (PANTHER) | IPR010945 (PANTHER) | IPR001252 (PROSITE_PATTERNS) | IPR011274 (CDD) | IPR015955 (SUPERFAMILY) | IPR036291 (SUPERFAMILY)	P:GO:0005975 | F:GO:0030060 | P:GO:0006108 | F:GO:0016615 | F:GO:0016616 | F:GO:0003824 | F:GO:0016491 | P:GO:0055114 | P:GO:0019752	P:carbohydrate metabolic process	P:malate metabolic process	F:malate dehydrogenase activity	F:oxidoreductase activity, acting on the CH-OH group of donors, NAD or NADP as acceptor	F:catalytic activity	F:oxidoreductase activity	P:oxidation-reduction process	P:carboxylic acid metabolic process
	VvCarFPS02VCR702_v1_PsGc_0.ver1_0.g000610.m01	VvCarFPS02VCR702_v1_PsGc_0.ver1_0.g000610	0	Malate dehydrogenase	P:GO:0005975 | P:GO:0006091 | F:GO:0003824	P:carbohydrate metabolic process | P:generation of precursor metabolites and energy | F:catalytic activity	EC:1.1.1.37	Malate dehydrogenase	G3DSA:3.40.50.720 (GENE3D) | IPR001557 (PIRSF) | IPR022383 (PFAM) | IPR015955 (G3DSA:3.90.110.GENE3D) | IPR010945 (TIGRFAM) | IPR001236 (PFAM) | IPR010945 (PANTHER) | PTHR23382:SF7 (PANTHER) | IPR001252 (PROSITE_PATTERNS) | IPR015955 (SUPERFAMILY) | IPR036291 (SUPERFAMILY)	P:GO:0005975 | P:GO:0006108 | F:GO:0016615 | F:GO:0016616 | F:GO:0003824 | F:GO:0016491 | P:GO:0055114 | P:GO:0019752	P:carbohydrate metabolic process	F:malate dehydrogenase activity	F:oxidoreductase activity, acting on the CH-OH group of donors, NAD or NADP as acceptor	F:catalytic activity	F:oxidoreductase activity	P:oxidation-reduction process	P:carboxylic acid metabolic process
	VvCarFPS02VCR702_v1_PsGc_0.ver1_0.g000620.m01	VvCarFPS02VCR702_v1_PsGc_0.ver1_0.g000620	0	malate dehydrogenase	P:GO:0006091 | F:GO:0003824	P:generation of precursor metabolites and energy | F:catalytic activity	0	0	IPR001236 (PFAM) | G3DSA:3.40.50.720 (GENE3D) | IPR010945 (PANTHER) | PTHR23382:SF7 (PANTHER) | IPR036291 (SUPERFAMILY) | TMhelix (TMHMM)	P:GO:0006108 | F:GO:0016615 | F:GO:0016491 | P:GO:0055114	P:malate metabolic process	F:oxidoreductase activity	P:oxidation-reduction process
	VvCarFPS02VCR702_v1_PsGc_0.ver1_0.g000630.m01	VvCarFPS02VCR702_v1_PsGc_0.ver1_0.g000630	0	import inner membrane translocase subunit TIM44-2	C:GO:0005739 | C:GO:0016020	C:mitochondrion | C:membrane	0	0	IPR007379 (SMART) | G3DSA:3.10.450.240 (GENE3D) | IPR007379 (PFAM) | PTHR10721 (PANTHER) | IPR032710 (SUPERFAMILY)	no GO terms	no GO terms
	VvCarFPS02VCR702_v1_PsGc_0.ver1_0.g000640.m01	VvCarFPS02VCR702_v1_PsGc_0.ver1_0.g000640	0	import inner membrane translocase subunit TIM44-2	0	0	0	0	no IPS match	no IPS match	no IPS match
	VvCarFPS02VCR702_v1_PsGc_0.ver1_0.g000650.m01	VvCarFPS02VCR702_v1_PsGc_0.ver1_0.g000650	0	pollen Ole e I family allergen	0	0	0	0	PTHR33210 (PANTHER) | PTHR33210:SF10 (PANTHER) | SignalP-noTM (SIGNALP_EUK) | SignalP-TM (SIGNALP_GRAM_POSITIVE) | SignalP-noTM (SIGNALP_GRAM_NEGATIVE) | TMhelix (TMHMM)	no GO terms	no GO terms
	VvCarFPS02VCR702_v1_PsGc_0.ver1_0.g000660.m01	VvCarFPS02VCR702_v1_PsGc_0.ver1_0.g000660	0	glutelin type-A 1-like	F:GO:0003674	F:molecular_function	0	0	IPR006044 (PRINTS) | IPR006045 (SMART) | IPR006045 (PFAM) | IPR014710 (G3DSA:2.60.120.GENE3D) | IPR014710 (G3DSA:2.60.120.GENE3D) | mobidb-lite (MOBIDB_LITE) | mobidb-lite (MOBIDB_LITE) | PTHR31189:SF1 (PANTHER) | PTHR31189 (PANTHER) | PTHR31189:SF1 (PANTHER) | PTHR31189 (PANTHER) | IPR022379 (PROSITE_PATTERNS) | IPR011051 (SUPERFAMILY)	F:GO:0045735	F:nutrient reservoir activity
	VvCarFPS02VCR702_v1_PsGc_0.ver1_0.g000670.m01	VvCarFPS02VCR702_v1_PsGc_0.ver1_0.g000670	0	glutelin type-A 1-like	F:GO:0003674	F:molecular_function	0	0	IPR006044 (PRINTS) | IPR006045 (SMART) | IPR014710 (G3DSA:2.60.120.GENE3D) | IPR014710 (G3DSA:2.60.120.GENE3D) | IPR006045 (PFAM) | mobidb-lite (MOBIDB_LITE) | mobidb-lite (MOBIDB_LITE) | mobidb-lite (MOBIDB_LITE) | PTHR31189 (PANTHER) | PTHR31189:SF1 (PANTHER) | IPR022379 (PROSITE_PATTERNS) | IPR011051 (SUPERFAMILY) | TMhelix (TMHMM)	F:GO:0045735	F:nutrient reservoir activity
	VvCarFPS02VCR702_v1_PsGc_0.ver1_0.g000680.m01	VvCarFPS02VCR702_v1_PsGc_0.ver1_0.g000680	0	glutelin type-A 1-like	F:GO:0003674	F:molecular_function	0	0	IPR006044 (PRINTS) | IPR006045 (SMART) | IPR014710 (G3DSA:2.60.120.GENE3D) | IPR006045 (PFAM) | IPR014710 (G3DSA:2.60.120.GENE3D) | IPR014710 (G3DSA:2.60.120.GENE3D) | mobidb-lite (MOBIDB_LITE) | mobidb-lite (MOBIDB_LITE) | mobidb-lite (MOBIDB_LITE) | PTHR31189:SF1 (PANTHER) | PTHR31189 (PANTHER) | IPR022379 (PROSITE_PATTERNS) | IPR011051 (SUPERFAMILY)	F:GO:0045735	F:nutrient reservoir activity
	VvCarFPS02VCR702_v1_PsGc_0.ver1_0.g000690.m01	VvCarFPS02VCR702_v1_PsGc_0.ver1_0.g000690	0	Sec14p-like phosphatidylinositol transfer family	C:GO:0016020	C:membrane	0	0	PR00180 (PRINTS) | IPR011074 (SMART) | IPR001251 (SMART) | IPR036865 (G3DSA:3.40.525.GENE3D) | IPR001251 (PFAM) | IPR011074 (PFAM) | mobidb-lite (MOBIDB_LITE) | PTHR23324 (PANTHER) | PTHR23324:SF82 (PANTHER) | IPR009038 (PROSITE_PROFILES) | IPR001251 (PROSITE_PROFILES) | IPR001251 (CDD) | IPR036273 (SUPERFAMILY) | IPR036865 (SUPERFAMILY)	no GO terms	no GO terms
	VvCarFPS02VCR702_v1_PsGc_0.ver1_0.g000700.m01	VvCarFPS02VCR702_v1_PsGc_0.ver1_0.g000700	0	structural maintenance of chromosomes	F:GO:0000166 | F:GO:0005515 | P:GO:0016043 | F:GO:0003682 | C:GO:0005622 | P:GO:0007049	F:nucleotide binding | F:protein binding | P:cellular component organization | F:chromatin binding | C:intracellular | P:cell cycle	0	0	Coil (COILS) | Coil (COILS) | Coil (COILS) | Coil (COILS) | G3DSA:3.30.70.1620 (GENE3D) | G3DSA:3.40.50.300 (GENE3D) | IPR003395 (PFAM) | PTHR18937 (PANTHER) | IPR028468 (PTHR18937:PANTHER) | cd03275 (CDD) | IPR036277 (SUPERFAMILY) | IPR027417 (SUPERFAMILY)	F:GO:0005524 | F:GO:0005515 | F:GO:0046982 | P:GO:0051276 | P:GO:0007064 | C:GO:0008278 | F:GO:0003682 | C:GO:0005694	F:ATP binding	F:protein heterodimerization activity	P:chromosome organization	P:mitotic sister chromatid cohesion	C:cohesin complex	F:chromatin binding	C:chromosome
	VvCarFPS02VCR702_v1_PsGc_0.ver1_0.g000710.m01	VvCarFPS02VCR702_v1_PsGc_0.ver1_0.g000710	0	structural maintenance of chromosomes	F:GO:0000166 | F:GO:0005515 | P:GO:0016043 | F:GO:0003682 | C:GO:0005622 | P:GO:0007049	F:nucleotide binding | F:protein binding | P:cellular component organization | F:chromatin binding | C:intracellular | P:cell cycle	0	0	Coil (COILS) | Coil (COILS) | Coil (COILS) | IPR010935 (SMART) | IPR010935 (PFAM) | G3DSA:1.20.1060.20 (GENE3D) | IPR028468 (PTHR18937:PANTHER) | PTHR18937 (PANTHER) | IPR036277 (SUPERFAMILY)	F:GO:0005524 | F:GO:0005515 | P:GO:0051276 | F:GO:0046982 | P:GO:0007064 | C:GO:0008278 | C:GO:0005694 | F:GO:0003682	F:ATP binding	P:chromosome organization	F:protein heterodimerization activity	P:mitotic sister chromatid cohesion	C:cohesin complex	C:chromosome	F:chromatin binding
	VvCarFPS02VCR702_v1_PsGc_0.ver1_0.g000720.m01	VvCarFPS02VCR702_v1_PsGc_0.ver1_0.g000720	0	peptidase S24 S26A S26B S26C family	C:GO:0016020 | C:GO:0005739	C:membrane | C:mitochondrion	0	0	G3DSA:2.10.109.10 (GENE3D) | PTHR12383 (PANTHER) | PTHR12383:SF5 (PANTHER) | cd06530 (CDD) | IPR036286 (SUPERFAMILY)	no GO terms	no GO terms
	VvCarFPS02VCR702_v1_PsGc_0.ver1_0.g000730.m01	VvCarFPS02VCR702_v1_PsGc_0.ver1_0.g000730	0	SAP BP-73	P:GO:0009058 | P:GO:0006139	P:biosynthetic process | P:nucleobase-containing compound metabolic process	0	0	Coil (COILS) | IPR011112 (SMART) | IPR011112 (PFAM) | mobidb-lite (MOBIDB_LITE) | mobidb-lite (MOBIDB_LITE) | PTHR34449 (PANTHER) | PTHR34449:SF2 (PANTHER)	P:GO:0006353	P:DNA-templated transcription, termination
	VvCarFPS02VCR702_v1_PsGc_0.ver1_0.g000740.m01	VvCarFPS02VCR702_v1_PsGc_0.ver1_0.g000740	0	armadillo beta-catenin repeat family	F:GO:0005515 | P:GO:0006464 | F:GO:0016740	F:protein binding | P:cellular protein modification process | F:transferase activity	0	0	Coil (COILS) | IPR000225 (SMART) | IPR003613 (SMART) | IPR013083 (G3DSA:3.30.40.GENE3D) | IPR011989 (G3DSA:1.25.10.GENE3D) | IPR011989 (G3DSA:1.25.10.GENE3D) | IPR000225 (PFAM) | IPR011989 (G3DSA:1.25.10.GENE3D) | IPR003613 (PFAM) | mobidb-lite (MOBIDB_LITE) | PTHR23315 (PANTHER) | PTHR23315:SF119 (PANTHER) | IPR000225 (PROSITE_PROFILES) | IPR003613 (PROSITE_PROFILES) | IPR000225 (PROSITE_PROFILE…	F:GO:0004842 | F:GO:0005515 | F:GO:0005488 | P:GO:0016567	F:ubiquitin-protein transferase activity	F:binding	P:protein ubiquitination
	VvCarFPS02VCR702_v1_PsGc_0.ver1_0.g000750.m01	VvCarFPS02VCR702_v1_PsGc_0.ver1_0.g000750	0	LIGHT-DEPENDENT SHORT HYPOCOTYLS 4-like isoform X2	C:GO:0005634	C:nucleus	0	0	IPR006936 (PFAM) | mobidb-lite (MOBIDB_LITE) | mobidb-lite (MOBIDB_LITE) | PTHR31165 (PANTHER) | PTHR31165:SF38 (PANTHER) | IPR006936 (PROSITE_PROFILES)	no GO terms	no GO terms
	VvCarFPS02VCR702_v1_PsGc_0.ver1_0.g000760.m01	VvCarFPS02VCR702_v1_PsGc_0.ver1_0.g000760	0	50S ribosomal chloroplastic-like	F:GO:0003723 | F:GO:0005198 | C:GO:0005840 | C:GO:0009536 | P:GO:0006412	F:RNA binding | F:structural molecule activity | C:ribosome | C:plastid | P:translation	0	0	IPR020526 (PFAM) | mobidb-lite (MOBIDB_LITE) | IPR020526 (PANTHER) | IPR020526 (PRODOM) | SignalP-TM (SIGNALP_GRAM_POSITIVE)	C:GO:0009507 | F:GO:0003735 | C:GO:0005840 | F:GO:0019843 | P:GO:0006412	C:chloroplast	C:ribosome	F:rRNA binding	P:translation
	VvCarFPS02VCR702_v1_PsGc_0.ver1_0.g000770.m01	VvCarFPS02VCR702_v1_PsGc_0.ver1_0.g000770	0	probable arabinose 5-phosphate isomerase	P:GO:0005975 | F:GO:0003824 | F:GO:0005488	P:carbohydrate metabolic process | F:catalytic activity | F:binding	0	0	IPR001347 (PFAM) | IPR000644 (PFAM) | IPR004800 (TIGRFAM) | IPR004800 (PIRSF) | G3DSA:3.40.50.10490 (GENE3D) | G3DSA:3.10.580.10 (GENE3D) | PTHR11911 (PANTHER) | PTHR11911:SF62 (PANTHER) | IPR000644 (PROSITE_PROFILES) | IPR001347 (PROSITE_PROFILES) | IPR000644 (PROSITE_PROFILES) | cd04604 (CDD) | IPR035474 (CDD) | SSF53697 (SUPERFAMILY)	P:GO:0005975 | F:GO:0097367 | P:GO:1901135 | F:GO:0016853	P:carbohydrate metabolic process	P:carbohydrate derivative metabolic process	F:isomerase activity
	VvCarFPS02VCR702_v1_PsGc_0.ver1_0.g000780.m01	VvCarFPS02VCR702_v1_PsGc_0.ver1_0.g000780	0	lysine-specific demethylase JMJ16	F:GO:0016740	F:transferase activity	0	0	IPR003347 (SMART) | IPR003349 (SMART) | G3DSA:2.60.120.650 (GENE3D) | IPR003349 (PFAM) | IPR003347 (PFAM) | IPR004198 (PFAM) | PTHR10694 (PANTHER) | PTHR10694:SF54 (PANTHER) | PTHR10694 (PANTHER) | PTHR10694:SF54 (PANTHER) | IPR003347 (PROSITE_PROFILES) | IPR003349 (PROSITE_PROFILES) | SSF51197 (SUPERFAMILY)	no GO terms	no GO terms
	VvCarFPS02VCR702_v1_PsGc_0.ver1_0.g000790.m01	VvCarFPS02VCR702_v1_PsGc_0.ver1_0.g000790	0	CUP-SHAPED COTYLEDON 3-like	C:GO:0005634 | F:GO:0003677 | P:GO:0009058 | P:GO:0006139	C:nucleus | F:DNA binding | P:biosynthetic process | P:nucleobase-containing compound metabolic process	0	0	IPR036093 (G3DSA:3.30.310.GENE3D) | IPR003441 (PFAM) | PTHR31744:SF4 (PANTHER) | PTHR31744 (PANTHER) | IPR003441 (PROSITE_PROFILES) | IPR036093 (SUPERFAMILY)	F:GO:0003677 | P:GO:0006355	F:DNA binding
	VvCarFPS02VCR702_v1_PsGc_0.ver1_0.g000800.m01	VvCarFPS02VCR702_v1_PsGc_0.ver1_0.g000800	0	Serine Threonine-kinase	F:GO:0016301	F:kinase activity	0	0	Coil (COILS) | IPR018865 (PFAM) | mobidb-lite (MOBIDB_LITE) | IPR018865 (PANTHER)	no GO terms	no GO terms
	VvCarFPS02VCR702_v1_PsGc_0.ver1_0.g000810.m01	VvCarFPS02VCR702_v1_PsGc_0.ver1_0.g000810	0	probable methyltransferase PMT3	C:GO:0016020 | F:GO:0016740	C:membrane | F:transferase activity	0	0	IPR004159 (PFAM) | G3DSA:3.40.50.150 (GENE3D) | IPR004159 (PANTHER) | PTHR10108:SF704 (PANTHER) | IPR029063 (SUPERFAMILY) | IPR029063 (SUPERFAMILY) | TMhelix (TMHMM)	F:GO:0008168	F:methyltransferase activity
	VvCarFPS02VCR702_v1_PsGc_0.ver1_0.g000820.m01	VvCarFPS02VCR702_v1_PsGc_0.ver1_0.g000820	0	dolichyl-diphosphooligosaccharide-- glycosyltransferase subunit 2-like	C:GO:0005737 | C:GO:0016020 | P:GO:0006464 | C:GO:0005783 | P:GO:0009058	C:cytoplasm | C:membrane | P:cellular protein modification process | C:endoplasmic reticulum | P:biosynthetic process	0	0	IPR008814 (PFAM) | IPR008814 (PANTHER) | TMhelix (TMHMM) | TMhelix (TMHMM) | TMhelix (TMHMM)	C:GO:0008250 | C:GO:0016021 | P:GO:0006487	C:oligosaccharyltransferase complex	P:protein N-linked glycosylation
	VvCarFPS02VCR702_v1_PsGc_0.ver1_0.g000830.m01	VvCarFPS02VCR702_v1_PsGc_0.ver1_0.g000830	0	adaptin ear-binding coat-associated 1	C:GO:0016020 | P:GO:0006810	C:membrane | P:transport	0	0	IPR011993 (G3DSA:2.30.29.GENE3D) | IPR012466 (PFAM) | mobidb-lite (MOBIDB_LITE) | mobidb-lite (MOBIDB_LITE) | mobidb-lite (MOBIDB_LITE) | PTHR12847 (PANTHER) | PTHR12847:SF3 (PANTHER) | PTHR12847:SF3 (PANTHER)	C:GO:0016020 | P:GO:0006897	C:membrane
	VvCarFPS02VCR702_v1_PsGc_0.ver1_0.g000840.m01	VvCarFPS02VCR702_v1_PsGc_0.ver1_0.g000840	0	CHROMATIN REMODELING 8	0	0	0	0	Coil (COILS) | G3DSA:3.40.50.300 (GENE3D) | mobidb-lite (MOBIDB_LITE) | mobidb-lite (MOBIDB_LITE) | PTHR10799 (PANTHER) | PTHR10799:SF837 (PANTHER) | IPR027417 (SUPERFAMILY)	no GO terms	no GO terms
	VvCarFPS02VCR702_v1_PsGc_0.ver1_0.g000850.m01	VvCarFPS02VCR702_v1_PsGc_0.ver1_0.g000850	0	chromatin remodeling 8	F:GO:0000166	F:nucleotide binding	0	0	IPR000330 (PFAM) | G3DSA:3.40.50.300 (GENE3D) | IPR038718 (G3DSA:3.40.50.GENE3D) | PTHR10799:SF837 (PANTHER) | PTHR10799 (PANTHER) | IPR027417 (SUPERFAMILY) | IPR027417 (SUPERFAMILY)	F:GO:0005524	F:ATP binding
	VvCarFPS02VCR702_v1_PsGc_0.ver1_0.g000860.m01	VvCarFPS02VCR702_v1_PsGc_0.ver1_0.g000860	0	CHROMATIN REMODELING 8	F:GO:0000166	F:nucleotide binding	0	0	Coil (COILS) | IPR014001 (SMART) | IPR038718 (G3DSA:3.40.50.GENE3D) | IPR000330 (PFAM) | mobidb-lite (MOBIDB_LITE) | mobidb-lite (MOBIDB_LITE) | mobidb-lite (MOBIDB_LITE) | mobidb-lite (MOBIDB_LITE) | mobidb-lite (MOBIDB_LITE) | PTHR10799:SF837 (PANTHER) | PTHR10799 (PANTHER) | cd00046 (CDD) | IPR027417 (SUPERFAMILY)	F:GO:0005524	F:ATP binding
	VvCarFPS02VCR702_v1_PsGc_0.ver1_0.g000870.m01	VvCarFPS02VCR702_v1_PsGc_0.ver1_0.g000870	0	P-loop containing nucleoside triphosphate hydrolases superfamily	F:GO:0000166 | F:GO:0016787	F:nucleotide binding | F:hydrolase activity	EC:3.6.1.3 | EC:3.6.1.15	Adenosinetriphosphatase | Nucleoside-triphosphate phosphatase	IPR003593 (SMART) | IPR003439 (PFAM) | G3DSA:3.40.50.300 (GENE3D) | mobidb-lite (MOBIDB_LITE) | PTHR12847 (PANTHER) | PTHR12847:SF6 (PANTHER) | IPR003439 (PROSITE_PROFILES) | IPR027417 (SUPERFAMILY)	F:GO:0016887 | F:GO:0005524	F:ATPase activity
	VvCarFPS02VCR702_v1_PsGc_0.ver1_0.g000880.m01	VvCarFPS02VCR702_v1_PsGc_0.ver1_0.g000880	0	serine threonine- kinase tricorner-like	F:GO:0000166 | P:GO:0006464 | F:GO:0016301	F:nucleotide binding | P:cellular protein modification process | F:kinase activity	0	0	Coil (COILS) | IPR000719 (SMART) | G3DSA:3.30.200.20 (GENE3D) | IPR000719 (PFAM) | G3DSA:1.10.510.10 (GENE3D) | mobidb-lite (MOBIDB_LITE) | PTHR24356:SF312 (PANTHER) | PTHR24356 (PANTHER) | IPR008271 (PROSITE_PATTERNS) | IPR017441 (PROSITE_PATTERNS) | IPR000719 (PROSITE_PROFILES) | IPR011009 (SUPERFAMILY)	F:GO:0005524 | F:GO:0004672 | P:GO:0006468	F:ATP binding	P:protein phosphorylation
	VvCarFPS02VCR702_v1_PsGc_0.ver1_0.g000890.m01	VvCarFPS02VCR702_v1_PsGc_0.ver1_0.g000890	0	serine threonine- kinase tricorner-like	F:GO:0000166 | P:GO:0006464 | F:GO:0016301	F:nucleotide binding | P:cellular protein modification process | F:kinase activity	0	0	IPR000719 (SMART) | IPR000719 (PFAM) | G3DSA:1.10.510.10 (GENE3D) | PTHR24356 (PANTHER) | PTHR24356:SF312 (PANTHER) | IPR000719 (PROSITE_PROFILES) | IPR011009 (SUPERFAMILY)	F:GO:0005524 | F:GO:0004672 | P:GO:0006468	F:ATP binding	P:protein phosphorylation
	VvCarFPS02VCR702_v1_PsGc_0.ver1_0.g000900.m01	VvCarFPS02VCR702_v1_PsGc_0.ver1_0.g000900	0	GRAS family transcription factor	0	0	0	0	IPR005202 (PFAM) | PTHR31636:SF22 (PANTHER) | PTHR31636 (PANTHER) | IPR005202 (PROSITE_PROFILES)	no GO terms	no GO terms
	VvCarFPS02VCR702_v1_PsGc_0.ver1_0.g000910.m01	VvCarFPS02VCR702_v1_PsGc_0.ver1_0.g000910	0	casein kinase I	F:GO:0000166 | C:GO:0005737 | P:GO:0006464 | F:GO:0016301	F:nucleotide binding | C:cytoplasm | P:cellular protein modification process | F:kinase activity	0	0	IPR000719 (SMART) | IPR000719 (PFAM) | G3DSA:1.10.510.10 (GENE3D) | mobidb-lite (MOBIDB_LITE) | mobidb-lite (MOBIDB_LITE) | PTHR11909:SF114 (PANTHER) | PTHR11909 (PANTHER) | IPR008271 (PROSITE_PATTERNS) | IPR017441 (PROSITE_PATTERNS) | IPR000719 (PROSITE_PROFILES) | cd14125 (CDD) | IPR011009 (SUPERFAMILY)	F:GO:0005524 | F:GO:0004672 | P:GO:0006468	F:ATP binding	P:protein phosphorylation
	VvCarFPS02VCR702_v1_PsGc_0.ver1_0.g000920.m01	VvCarFPS02VCR702_v1_PsGc_0.ver1_0.g000920	0	SNF7 family	P:GO:0006810	P:transport	0	0	Coil (COILS) | IPR005024 (PFAM) | mobidb-lite (MOBIDB_LITE) | mobidb-lite (MOBIDB_LITE) | PTHR10476 (PANTHER) | PTHR10476:SF8 (PANTHER)	P:GO:0007034	P:vacuolar transport
	VvCarFPS02VCR702_v1_PsGc_0.ver1_0.g000930.m01	VvCarFPS02VCR702_v1_PsGc_0.ver1_0.g000930	0	Calcium-binding EF-hand family	F:GO:0005488	F:binding	0	0	G3DSA:1.10.238.230 (GENE3D) | mobidb-lite (MOBIDB_LITE) | PTHR14095:SF7 (PANTHER) | PTHR14095 (PANTHER) | IPR011992 (SUPERFAMILY)	no GO terms	no GO terms
	VvCarFPS02VCR702_v1_PsGc_0.ver1_0.g000940.m01	VvCarFPS02VCR702_v1_PsGc_0.ver1_0.g000940	0	calcium-binding EF-hand family	F:GO:0005488	F:binding	0	0	G3DSA:1.10.238.10 (GENE3D) | IPR002048 (PFAM) | PTHR14095 (PANTHER) | PTHR14095:SF7 (PANTHER) | IPR018247 (PROSITE_PATTERNS) | IPR002048 (PROSITE_PROFILES) | IPR011992 (SUPERFAMILY)	F:GO:0005509	F:calcium ion binding
	VvCarFPS02VCR702_v1_PsGc_0.ver1_0.g000950.m01	VvCarFPS02VCR702_v1_PsGc_0.ver1_0.g000950	0	Ypt Rab-GAP domain of gyp1p superfamily	C:GO:0005623	C:cell	0	0	IPR000195 (SMART) | G3DSA:1.10.8.270 (GENE3D) | IPR000195 (PFAM) | mobidb-lite (MOBIDB_LITE) | PTHR22957 (PANTHER) | PTHR22957:SF299 (PANTHER) | IPR000195 (PROSITE_PROFILES) | IPR035969 (SUPERFAMILY) | IPR035969 (SUPERFAMILY)	no GO terms	no GO terms
	VvCarFPS02VCR702_v1_PsGc_0.ver1_0.g000960.m01	VvCarFPS02VCR702_v1_PsGc_0.ver1_0.g000960	0	PAK-box P21-Rho-binding family	0	0	0	0	IPR000095 (SMART) | IPR000095 (PFAM) | mobidb-lite (MOBIDB_LITE) | PTHR23177 (PANTHER) | PTHR23177:SF53 (PANTHER) | IPR000095 (PROSITE_PROFILES) | IPR000095 (CDD)	no GO terms	no GO terms
	VvCarFPS02VCR702_v1_PsGc_0.ver1_0.g000970.m01	VvCarFPS02VCR702_v1_PsGc_0.ver1_0.g000970	0	TOO MANY MOUTHS	F:GO:0005515 | C:GO:0016020	F:protein binding | C:membrane	0	0	IPR001611 (PFAM) | IPR032675 (G3DSA:3.80.10.GENE3D) | PTHR44325 (PANTHER) | PTHR44325:SF3 (PANTHER) | SignalP-TM (SIGNALP_GRAM_POSITIVE) | SignalP-noTM (SIGNALP_EUK) | SSF52058 (SUPERFAMILY) | TMhelix (TMHMM) | TMhelix (TMHMM)	F:GO:0005515	F:protein binding
	VvCarFPS02VCR702_v1_PsGc_0.ver1_0.g000980.m01	VvCarFPS02VCR702_v1_PsGc_0.ver1_0.g000980	0	glutathione gamma-glutamylcysteinyltransferase 1-like	P:GO:0019748 | P:GO:0009058 | P:GO:0044763 | F:GO:0016740 | F:GO:0005488 | P:GO:0044711 | P:GO:0009987	P:secondary metabolic process | P:biosynthetic process | P:single-organism cellular process | F:transferase activity | F:binding | P:single-organism biosynthetic process | P:cellular process	EC:2.3.2.15	Glutathione gamma-glutamylcysteinyltransferase	IPR038156 (G3DSA:3.90.70.GENE3D) | IPR007719 (PFAM) | IPR015407 (PFAM) | PTHR33447 (PANTHER) | IPR007719 (PROSITE_PROFILES) | SSF54001 (SUPERFAMILY)	P:GO:0046938 | F:GO:0016756 | F:GO:0046872 | P:GO:0010038	P:phytochelatin biosynthetic process	F:metal ion binding	P:response to metal ion
	VvCarFPS02VCR702_v1_PsGc_0.ver1_0.g000990.m01	VvCarFPS02VCR702_v1_PsGc_0.ver1_0.g000990	0	long-chain-alcohol oxidase FAO1-like	F:GO:0000166 | F:GO:0003824 | C:GO:0016020 | P:GO:0008152 | P:GO:0044710	F:nucleotide binding | F:catalytic activity | C:membrane | P:metabolic process | P:single-organism metabolic process	EC:1.1.3.20	Long-chain-alcohol oxidase	IPR000172 (PFAM) | IPR036188 (G3DSA:3.50.50.GENE3D) | IPR007867 (PFAM) | IPR012400 (PIRSF) | IPR036188 (G3DSA:3.50.50.GENE3D) | IPR036188 (G3DSA:3.50.50.GENE3D) | PTHR10668:SF100 (PANTHER) | PTHR10668 (PANTHER) | IPR036188 (SUPERFAMILY) | TMhelix (TMHMM)	F:GO:0016614 | F:GO:0050660 | P:GO:0055114 | F:GO:0046577	F:oxidoreductase activity, acting on CH-OH group of donors	P:oxidation-reduction process	F:long-chain-alcohol oxidase activity
	VvCarFPS02VCR702_v1_PsGc_0.ver1_0.g001000.m01	VvCarFPS02VCR702_v1_PsGc_0.ver1_0.g001000	0	succinate-- ligase [ADP-forming] subunit mitochondrial	P:GO:0006091 | F:GO:0003824	P:generation of precursor metabolites and energy | F:catalytic activity	0	0	IPR016102 (G3DSA:3.40.50.GENE3D) | IPR005811 (PFAM) | PTHR11815:SF5 (PANTHER) | IPR005809 (PANTHER) | IPR016102 (SUPERFAMILY)	F:GO:0003824 | P:GO:0008152 | P:GO:0006099	F:catalytic activity	P:tricarboxylic acid cycle
	VvCarFPS02VCR702_v1_PsGc_0.ver1_0.g001010.m01	VvCarFPS02VCR702_v1_PsGc_0.ver1_0.g001010	0	succinate-- ligase [ADP-forming] subunit mitochondrial	P:GO:0006091	P:generation of precursor metabolites and energy	0	0	G3DSA:3.30.470.20 (GENE3D) | IPR005809 (PANTHER) | PTHR11815:SF5 (PANTHER) | SSF56059 (SUPERFAMILY)	P:GO:0006099	P:tricarboxylic acid cycle
	VvCarFPS02VCR702_v1_PsGc_0.ver1_0.g001020.m01	VvCarFPS02VCR702_v1_PsGc_0.ver1_0.g001020	0	succinate-- ligase [ADP-forming] subunit mitochondrial	F:GO:0000166 | P:GO:0006091	F:nucleotide binding | P:generation of precursor metabolites and energy	0	0	IPR013650 (PFAM) | IPR013815 (G3DSA:3.30.1490.GENE3D) | PTHR11815:SF5 (PANTHER) | IPR005809 (PANTHER) | SSF56059 (SUPERFAMILY)	F:GO:0005524 | P:GO:0006099	F:ATP binding
	VvCarFPS02VCR702_v1_PsGc_0.ver1_0.g001030.m01	VvCarFPS02VCR702_v1_PsGc_0.ver1_0.g001030	0	Thioredoxin superfamily	C:GO:0009536	C:plastid	0	0	mobidb-lite (MOBIDB_LITE) | mobidb-lite (MOBIDB_LITE) | PTHR34669 (PANTHER) | PTHR34669:SF2 (PANTHER) | IPR036249 (SUPERFAMILY)	no GO terms	no GO terms
	VvCarFPS02VCR702_v1_PsGc_0.ver1_0.g001040.m01	VvCarFPS02VCR702_v1_PsGc_0.ver1_0.g001040	0	embryo sac development arrest	P:GO:0009791 | P:GO:0000003	P:post-embryonic development | P:reproduction	0	0	mobidb-lite (MOBIDB_LITE) | PTHR34657:SF2 (PANTHER) | PTHR34657 (PANTHER)	no GO terms	no GO terms
	VvCarFPS02VCR702_v1_PsGc_0.ver1_0.g001050.m01	VvCarFPS02VCR702_v1_PsGc_0.ver1_0.g001050	0	embryo sac development arrest	P:GO:0009790 | P:GO:0009791 | P:GO:0000003	P:embryo development | P:post-embryonic development | P:reproduction	0	0	mobidb-lite (MOBIDB_LITE) | PTHR34657 (PANTHER)	no GO terms	no GO terms
	VvCarFPS02VCR702_v1_PsGc_0.ver1_0.g001060.m01	VvCarFPS02VCR702_v1_PsGc_0.ver1_0.g001060	0	NPGR2-like isoform X1	F:GO:0005515 | C:GO:0016020	F:protein binding | C:membrane	0	0	IPR019734 (SMART) | IPR011990 (G3DSA:1.25.40.GENE3D) | IPR011990 (G3DSA:1.25.40.GENE3D) | IPR011990 (G3DSA:1.25.40.GENE3D) | PTHR44102:SF2 (PANTHER) | PTHR44102 (PANTHER) | IPR013026 (PROSITE_PROFILES) | IPR011990 (SUPERFAMILY) | IPR011990 (SUPERFAMILY)	F:GO:0005515	F:protein binding
	VvCarFPS02VCR702_v1_PsGc_0.ver1_0.g001070.m01	VvCarFPS02VCR702_v1_PsGc_0.ver1_0.g001070	0	transcription termination factor chloroplastic-like	0	0	0	0	PTHR13068:SF31 (PANTHER) | PTHR13068 (PANTHER) | SignalP-TM (SIGNALP_GRAM_POSITIVE)	no GO terms	no GO terms
	VvCarFPS02VCR702_v1_PsGc_0.ver1_0.g001080.m01	VvCarFPS02VCR702_v1_PsGc_0.ver1_0.g001080	0	transcription termination factor chloroplastic-like	F:GO:0003677 | P:GO:0009058 | P:GO:0006139 | C:GO:0009536	F:DNA binding | P:biosynthetic process | P:nucleobase-containing compound metabolic process | C:plastid	0	0	IPR003690 (SMART) | IPR038538 (G3DSA:1.25.70.GENE3D) | IPR003690 (PFAM) | PTHR13068 (PANTHER) | PTHR13068:SF31 (PANTHER)	F:GO:0003690 | P:GO:0006355	F:double-stranded DNA binding
	VvCarFPS02VCR702_v1_PsGc_0.ver1_0.g001090.m01	VvCarFPS02VCR702_v1_PsGc_0.ver1_0.g001090	0	transcription termination factor family	F:GO:0003677 | P:GO:0009058 | P:GO:0006139	F:DNA binding | P:biosynthetic process | P:nucleobase-containing compound metabolic process	0	0	IPR003690 (SMART) | IPR038538 (G3DSA:1.25.70.GENE3D) | IPR003690 (PFAM) | PTHR13068 (PANTHER) | PTHR13068:SF31 (PANTHER)	F:GO:0003690 | P:GO:0006355	F:double-stranded DNA binding
	VvCarFPS02VCR702_v1_PsGc_0.ver1_0.g001100.m01	VvCarFPS02VCR702_v1_PsGc_0.ver1_0.g001100	0	transcription termination factor mitochondrial-like	F:GO:0003677 | P:GO:0009058 | P:GO:0006139 | C:GO:0009536	F:DNA binding | P:biosynthetic process | P:nucleobase-containing compound metabolic process | C:plastid	0	0	IPR003690 (SMART) | IPR003690 (PFAM) | IPR038538 (G3DSA:1.25.70.GENE3D) | PTHR13068:SF31 (PANTHER) | PTHR13068 (PANTHER)	F:GO:0003690 | P:GO:0006355	F:double-stranded DNA binding
	VvCarFPS02VCR702_v1_PsGc_0.ver1_0.g001110.m01	VvCarFPS02VCR702_v1_PsGc_0.ver1_0.g001110	0	mitochondrial transcription termination factor family	F:GO:0003677 | P:GO:0009058 | P:GO:0006139	F:DNA binding | P:biosynthetic process | P:nucleobase-containing compound metabolic process	0	0	IPR038538 (G3DSA:1.25.70.GENE3D) | IPR003690 (PFAM) | PTHR13068:SF31 (PANTHER) | PTHR13068 (PANTHER) | TMhelix (TMHMM)	F:GO:0003690 | P:GO:0006355	F:double-stranded DNA binding
	VvCarFPS02VCR702_v1_PsGc_0.ver1_0.g001120.m01	VvCarFPS02VCR702_v1_PsGc_0.ver1_0.g001120	0	phospholipid--sterol O-acyltransferase	P:GO:0019538 | P:GO:0006629 | P:GO:0009058 | F:GO:0016740 | P:GO:0009987	P:protein metabolic process | P:lipid metabolic process | P:biosynthetic process | F:transferase activity | P:cellular process	0	0	IPR003386 (PFAM) | IPR029058 (G3DSA:3.40.50.GENE3D) | PTHR11440 (PANTHER) | PTHR11440 (PANTHER) | PTHR11440:SF7 (PANTHER) | PTHR11440:SF7 (PANTHER) | SignalP-noTM (SIGNALP_EUK) | SignalP-noTM (SIGNALP_GRAM_NEGATIVE) | IPR029058 (SUPERFAMILY)	F:GO:0008374 | P:GO:0006629	F:O-acyltransferase activity
	VvCarFPS02VCR702_v1_PsGc_0.ver1_0.g001130.m01	VvCarFPS02VCR702_v1_PsGc_0.ver1_0.g001130	0	exocyst complex component EXO84B-like	C:GO:0005737 | P:GO:0044763 | P:GO:0044765 | P:GO:0006810 | P:GO:0009987	C:cytoplasm | P:single-organism cellular process | P:single-organism transport | P:transport | P:cellular process	0	0	IPR032403 (PFAM) | PF08700 (PFAM) | mobidb-lite (MOBIDB_LITE) | IPR033961 (PANTHER) | PTHR21426:SF13 (PANTHER) | IPR016159 (SUPERFAMILY)	P:GO:0006887 | C:GO:0000145	P:exocytosis
	VvCarFPS02VCR702_v1_PsGc_0.ver1_0.g001140.m01	VvCarFPS02VCR702_v1_PsGc_0.ver1_0.g001140	0	exocyst complex component EXO84B-like	C:GO:0005737 | P:GO:0044763 | P:GO:0044765 | P:GO:0006810 | P:GO:0009987	C:cytoplasm | P:single-organism cellular process | P:single-organism transport | P:transport | P:cellular process	0	0	mobidb-lite (MOBIDB_LITE) | mobidb-lite (MOBIDB_LITE) | IPR033961 (PANTHER) | PTHR21426:SF13 (PANTHER)	P:GO:0006887 | C:GO:0000145	P:exocytosis
	VvCarFPS02VCR702_v1_PsGc_0.ver1_0.g001150.m01	VvCarFPS02VCR702_v1_PsGc_0.ver1_0.g001150	0	plastid developmental DAG	C:GO:0005739	C:mitochondrion	0	0	mobidb-lite (MOBIDB_LITE) | PTHR31346:SF9 (PANTHER) | PTHR31346 (PANTHER)	no GO terms	no GO terms
	VvCarFPS02VCR702_v1_PsGc_0.ver1_0.g001160.m01	VvCarFPS02VCR702_v1_PsGc_0.ver1_0.g001160	0	BREAST CANCER SUSCEPTIBILITY 1 homolog	F:GO:0005488 | P:GO:0006259 | P:GO:0006950	F:binding | P:DNA metabolic process | P:response to stress	0	0	IPR001357 (SMART) | IPR036420 (G3DSA:3.40.50.GENE3D) | IPR001357 (PFAM) | IPR013083 (G3DSA:3.30.40.GENE3D) | IPR036420 (G3DSA:3.40.50.GENE3D) | PF13771 (PFAM) | mobidb-lite (MOBIDB_LITE) | IPR031099 (PANTHER) | PTHR13763:SF1 (PANTHER) | IPR001357 (PROSITE_PROFILES) | IPR034732 (PROSITE_PROFILES) | IPR001357 (PROSITE_PROFILES) | IPR001357 (CDD) | IPR036420 (SUPERFAMILY) | IPR036420 (SUPERFAMILY)	P:GO:0006281 | P:GO:0006974	P:DNA repair
	VvCarFPS02VCR702_v1_PsGc_0.ver1_0.g001170.m01	VvCarFPS02VCR702_v1_PsGc_0.ver1_0.g001170	0	ankyrin repeat	0	0	0	0	mobidb-lite (MOBIDB_LITE) | PTHR24177:SF30 (PANTHER) | PTHR24177 (PANTHER)	no GO terms	no GO terms
	VvCarFPS02VCR702_v1_PsGc_1.ver1_0.g001180.m01	VvCarFPS02VCR702_v1_PsGc_1.ver1_0.g001180	0	SNF7 family	P:GO:0006810	P:transport	0	0	Coil (COILS) | IPR005024 (PFAM) | PTHR22761:SF39 (PANTHER) | PTHR22761 (PANTHER)	P:GO:0007034	P:vacuolar transport
	VvCarFPS02VCR702_v1_PsGc_1.ver1_0.g001190.m01	VvCarFPS02VCR702_v1_PsGc_1.ver1_0.g001190	0	MATE efflux family	0	0	0	0	PTHR11206:SF87 (PANTHER) | PTHR11206:SF87 (PANTHER) | PTHR11206 (PANTHER)	no GO terms	no GO terms
	VvCarFPS02VCR702_v1_PsGc_10.ver1_0.g001200.m01	VvCarFPS02VCR702_v1_PsGc_10.ver1_0.g001200	0	Arginine decarboxylase	F:GO:0003824 | P:GO:0009056 | P:GO:0044763 | P:GO:0009058 | P:GO:0009987 | P:GO:0044712	F:catalytic activity | P:catabolic process | P:single-organism cellular process | P:biosynthetic process | P:cellular process | P:single-organism catabolic process	EC:4.1.1.19	Arginine decarboxylase	IPR029066 (G3DSA:3.20.20.GENE3D) | IPR002985 (PANTHER) | IPR029066 (SUPERFAMILY)	P:GO:0006527 | F:GO:0008792 | P:GO:0008295	P:arginine catabolic process	P:spermidine biosynthetic process
	VvCarFPS02VCR702_v1_PsGc_100.ver1_0.g001210.m01	VvCarFPS02VCR702_v1_PsGc_100.ver1_0.g001210	0	dehydration-responsive element-binding 2C-like	0	0	0	0	PTHR31241:SF17 (PANTHER) | PTHR31241 (PANTHER)	no GO terms	no GO terms
	VvCarFPS02VCR702_v1_PsGc_100.ver1_0.g001220.m01	VvCarFPS02VCR702_v1_PsGc_100.ver1_0.g001220	0	DETOXIFICATION chloroplastic isoform X1	C:GO:0016020 | P:GO:0044765 | P:GO:0006810 | F:GO:0005215	C:membrane | P:single-organism transport | P:transport | F:transporter activity	0	0	IPR002528 (TIGRFAM) | IPR002528 (PFAM) | mobidb-lite (MOBIDB_LITE) | PTHR42893 (PANTHER) | PTHR42893:SF1 (PANTHER) | cd13136 (CDD) | TMhelix (TMHMM) | TMhelix (TMHMM) | TMhelix (TMHMM) | TMhelix (TMHMM) | TMhelix (TMHMM) | TMhelix (TMHMM) | TMhelix (TMHMM) | TMhelix (TMHMM) | TMhelix (TMHMM)	P:GO:0006855 | P:GO:0055085 | F:GO:0015297 | C:GO:0016020 | F:GO:0015238	P:drug transmembrane transport	F:antiporter activity	C:membrane	F:drug transmembrane transporter activity
	VvCarFPS02VCR702_v1_PsGc_100.ver1_0.g001230.m01	VvCarFPS02VCR702_v1_PsGc_100.ver1_0.g001230	0	Breast cancer type 2 susceptibility	P:GO:0006259 | P:GO:0006950	P:DNA metabolic process | P:response to stress	0	0	IPR015205 (SMART) | IPR015187 (PFAM) | IPR015252 (PFAM) | G3DSA:2.40.50.140 (GENE3D) | G3DSA:1.10.132.40 (GENE3D) | G3DSA:2.40.50.140 (GENE3D) | IPR002093 (PFAM) | mobidb-lite (MOBIDB_LITE) | mobidb-lite (MOBIDB_LITE) | IPR015525 (PANTHER) | IPR002093 (PROSITE_PROFILES) | IPR015187 (CDD) | IPR012340 (SUPERFAMILY) | IPR012340 (SUPERFAMILY) | IPR012340 (SUPERFAMILY) | IPR036315 (SUPERFAMILY) | SSF8…	P:GO:0006281 | P:GO:0000724	P:DNA repair
	VvCarFPS02VCR702_v1_PsGc_100.ver1_0.g001240.m01	VvCarFPS02VCR702_v1_PsGc_100.ver1_0.g001240	0	Brassinosteroid signaling positive regulator (BZR1) family	F:GO:0003700 | P:GO:0007165 | P:GO:0009719 | P:GO:0009058 | P:GO:0006139 | C:GO:0005622	F:transcription factor activity, sequence-specific DNA binding | P:signal transduction | P:response to endogenous stimulus | P:biosynthetic process | P:nucleobase-containing compound metabolic process | C:intracellular	0	0	IPR008540 (PFAM) | IPR033264 (PANTHER) | PTHR31506:SF9 (PANTHER)	F:GO:0003700 | P:GO:0006351 | P:GO:0009742	F:transcription factor activity, sequence-specific DNA binding	P:brassinosteroid mediated signaling pathway
	VvCarFPS02VCR702_v1_PsGc_100.ver1_0.g001250.m01	VvCarFPS02VCR702_v1_PsGc_100.ver1_0.g001250	0	trichome birefringence-like 34	C:GO:0005794	C:Golgi apparatus	0	0	IPR025846 (PFAM) | IPR026057 (PFAM) | mobidb-lite (MOBIDB_LITE) | PTHR32285:SF32 (PANTHER) | IPR029962 (PANTHER) | TMhelix (TMHMM)	no GO terms	no GO terms
	VvCarFPS02VCR702_v1_PsGc_100.ver1_0.g001260.m01	VvCarFPS02VCR702_v1_PsGc_100.ver1_0.g001260	0	trichome birefringence-like 34	C:GO:0005794	C:Golgi apparatus	0	0	IPR025846 (PFAM) | IPR026057 (PFAM) | IPR029962 (PANTHER) | IPR029971 (PTHR32285:PANTHER) | TMhelix (TMHMM)	no GO terms	no GO terms
	VvCarFPS02VCR702_v1_PsGc_100.ver1_0.g001270.m01	VvCarFPS02VCR702_v1_PsGc_100.ver1_0.g001270	0	abscisic acid receptor PYL4-like	C:GO:0016020	C:membrane	0	0	IPR023393 (G3DSA:3.30.530.GENE3D) | IPR019587 (PFAM) | mobidb-lite (MOBIDB_LITE) | PTHR31213:SF48 (PANTHER) | PTHR31213 (PANTHER) | PTHR31213 (PANTHER) | cd07821 (CDD) | SignalP-TM (SIGNALP_GRAM_POSITIVE) | SSF55961 (SUPERFAMILY)	no GO terms	no GO terms
	VvCarFPS02VCR702_v1_PsGc_100.ver1_0.g001280.m01	VvCarFPS02VCR702_v1_PsGc_100.ver1_0.g001280	0	DUF538 family	0	0	0	0	IPR036758 (G3DSA:2.30.240.GENE3D) | IPR007493 (PFAM) | IPR007493 (PANTHER) | PTHR31676:SF67 (PANTHER) | IPR036758 (SUPERFAMILY)	no GO terms	no GO terms
	VvCarFPS02VCR702_v1_PsGc_100.ver1_0.g001290.m01	VvCarFPS02VCR702_v1_PsGc_100.ver1_0.g001290	0	mitochondrial substrate carrier family	C:GO:0016020 | P:GO:0006810	C:membrane | P:transport	0	0	IPR002067 (PRINTS) | IPR023395 (G3DSA:1.50.40.GENE3D) | IPR018108 (PFAM) | mobidb-lite (MOBIDB_LITE) | PTHR24089 (PANTHER) | PTHR24089:SF308 (PANTHER) | IPR018108 (PROSITE_PROFILES) | IPR018108 (PROSITE_PROFILES) | IPR018108 (PROSITE_PROFILES) | IPR023395 (SUPERFAMILY)	P:GO:0055085	P:transmembrane transport
	VvCarFPS02VCR702_v1_PsGc_100.ver1_0.g001300.m01	VvCarFPS02VCR702_v1_PsGc_100.ver1_0.g001300	0	ferritin- chloroplastic-like	C:GO:0005623 | P:GO:0019725 | F:GO:0005488 | P:GO:0006810	C:cell | P:cellular homeostasis | F:binding | P:transport	0	0	IPR012347 (G3DSA:1.20.1260.GENE3D) | IPR008331 (PFAM) | PTHR11431:SF76 (PANTHER) | IPR001519 (PANTHER) | IPR014034 (PROSITE_PATTERNS) | IPR009040 (PROSITE_PROFILES) | cd01056 (CDD) | SignalP-noTM (SIGNALP_EUK) | IPR009078 (SUPERFAMILY)	P:GO:0006879 | F:GO:0008199 | P:GO:0006826	P:cellular iron ion homeostasis	P:iron ion transport
	VvCarFPS02VCR702_v1_PsGc_100.ver1_0.g001310.m01	VvCarFPS02VCR702_v1_PsGc_100.ver1_0.g001310	0	elongation factor	0	0	0	0	PTHR33181 (PANTHER) | PTHR33181:SF15 (PANTHER)	no GO terms	no GO terms
	VvCarFPS02VCR702_v1_PsGc_100.ver1_0.g001320.m01	VvCarFPS02VCR702_v1_PsGc_100.ver1_0.g001320	0	40S ribosomal S4	F:GO:0003723 | F:GO:0005198 | C:GO:0005840 | P:GO:0006412	F:RNA binding | F:structural molecule activity | C:ribosome | P:translation	0	0	IPR005824 (SMART) | IPR002942 (SMART) | IPR032277 (PFAM) | IPR002942 (PFAM) | IPR013845 (PFAM) | G3DSA:3.10.290.40 (GENE3D) | IPR000876 (PIRSF) | IPR013843 (PFAM) | IPR005824 (PFAM) | IPR038237 (G3DSA:2.40.50.GENE3D) | IPR014722 (G3DSA:2.30.30.GENE3D) | IPR000876 (PANTHER) | PTHR11581:SF11 (PANTHER) | IPR018199 (PROSITE_PATTERNS) | IPR013845 (PRODOM) | IPR000876 (HAMAP) | IPR002942 (PROSITE_PROFI…	F:GO:0003723 | F:GO:0003735 | C:GO:0005840 | C:GO:0005622 | P:GO:0006412	F:RNA binding	C:ribosome	C:intracellular	P:translation
	VvCarFPS02VCR702_v1_PsGc_100.ver1_0.g001330.m01	VvCarFPS02VCR702_v1_PsGc_100.ver1_0.g001330	0	MAR-binding filament	0	0	0	0	mobidb-lite (MOBIDB_LITE) | mobidb-lite (MOBIDB_LITE)	no GO terms	no GO terms
	VvCarFPS02VCR702_v1_PsGc_100.ver1_0.g001340.m01	VvCarFPS02VCR702_v1_PsGc_100.ver1_0.g001340	0	TIC chloroplastic	0	0	0	0	IPR037471 (PANTHER)	no GO terms	no GO terms
	VvCarFPS02VCR702_v1_PsGc_100.ver1_0.g001350.m01	VvCarFPS02VCR702_v1_PsGc_100.ver1_0.g001350	0	histone-lysine N-methyltransferase ATXR3	C:GO:0009536	C:plastid	0	0	IPR025640 (PFAM) | mobidb-lite (MOBIDB_LITE) | IPR037471 (PANTHER)	no GO terms	no GO terms
	VvCarFPS02VCR702_v1_PsGc_100.ver1_0.g001360.m01	VvCarFPS02VCR702_v1_PsGc_100.ver1_0.g001360	0	gamma interferon inducible lysosomal thiol reductase	C:GO:0005773	C:vacuole	0	0	IPR004911 (PFAM) | PTHR13234:SF42 (PANTHER) | IPR004911 (PANTHER) | SignalP-noTM (SIGNALP_EUK) | TMhelix (TMHMM)	no GO terms	no GO terms
	VvCarFPS02VCR702_v1_PsGc_100.ver1_0.g001370.m01	VvCarFPS02VCR702_v1_PsGc_100.ver1_0.g001370	0	plectin	0	0	0	0	PTHR35730 (PANTHER)	no GO terms	no GO terms
	VvCarFPS02VCR702_v1_PsGc_100.ver1_0.g001380.m01	VvCarFPS02VCR702_v1_PsGc_100.ver1_0.g001380	0	plectin	0	0	0	0	Coil (COILS) | Coil (COILS) | PTHR35730 (PANTHER)	no GO terms	no GO terms
	VvCarFPS02VCR702_v1_PsGc_100.ver1_0.g001390.m01	VvCarFPS02VCR702_v1_PsGc_100.ver1_0.g001390	0	Pentatricopeptide repeat (PPR-like) superfamily	0	0	0	0	no IPS match	no IPS match	no IPS match
	VvCarFPS02VCR702_v1_PsGc_100.ver1_0.g001400.m01	VvCarFPS02VCR702_v1_PsGc_100.ver1_0.g001400	0	ubiquitin-activating enzyme E1 1-like	F:GO:0000166 | F:GO:0003824 | P:GO:0006464	F:nucleotide binding | F:catalytic activity | P:cellular protein modification process	0	0	IPR000011 (PRINTS) | IPR018965 (SMART) | IPR000594 (PFAM) | G3DSA:3.40.50.720 (GENE3D) | G3DSA:1.10.10.2660 (GENE3D) | IPR018075 (TIGRFAM) | G3DSA:3.50.50.80 (GENE3D) | IPR038252 (G3DSA:3.10.290.GENE3D) | IPR032420 (PFAM) | IPR032418 (PFAM) | G3DSA:2.40.30.180 (GENE3D) | G3DSA:3.40.50.12550 (GENE3D) | IPR018965 (PFAM) | IPR019572 (PFAM) | mobidb-lite (MOBIDB_LITE) | PTHR10953 (PANTHER) | PTHR1095…	P:GO:0006464 | F:GO:0008641	P:cellular protein modification process
	VvCarFPS02VCR702_v1_PsGc_100.ver1_0.g001410.m01	VvCarFPS02VCR702_v1_PsGc_100.ver1_0.g001410	0	nodulation-signaling pathway 2 -like	P:GO:0009058 | P:GO:0006139	P:biosynthetic process | P:nucleobase-containing compound metabolic process	0	0	IPR005202 (PFAM) | mobidb-lite (MOBIDB_LITE) | PTHR31636 (PANTHER) | PTHR31636:SF126 (PANTHER) | IPR005202 (PROSITE_PROFILES) | TMhelix (TMHMM)	no GO terms	no GO terms
	VvCarFPS02VCR702_v1_PsGc_100.ver1_0.g001420.m01	VvCarFPS02VCR702_v1_PsGc_100.ver1_0.g001420	0	nodulation-signaling pathway 2 -like	C:GO:0005634	C:nucleus	0	0	Coil (COILS) | IPR005202 (PFAM) | PTHR31636:SF126 (PANTHER) | PTHR31636 (PANTHER) | IPR005202 (PROSITE_PROFILES)	no GO terms	no GO terms
	VvCarFPS02VCR702_v1_PsGc_100.ver1_0.g001430.m01	VvCarFPS02VCR702_v1_PsGc_100.ver1_0.g001430	0	L-type lectin-domain containing receptor kinase -like	F:GO:0030246	F:carbohydrate binding	0	0	G3DSA:2.60.120.200 (GENE3D) | IPR001220 (PFAM) | IPR016363 (PIRSF) | PTHR27007 (PANTHER) | PTHR27007:SF43 (PANTHER) | IPR001220 (CDD) | IPR013320 (SUPERFAMILY) | TMhelix (TMHMM)	F:GO:0030246	F:carbohydrate binding
	VvCarFPS02VCR702_v1_PsGc_100.ver1_0.g001440.m01	VvCarFPS02VCR702_v1_PsGc_100.ver1_0.g001440	0	nodulation-signaling pathway 2 -like	P:GO:0009058 | P:GO:0006139	P:biosynthetic process | P:nucleobase-containing compound metabolic process	0	0	Coil (COILS) | IPR005202 (PFAM) | PTHR31636:SF126 (PANTHER) | PTHR31636 (PANTHER) | IPR005202 (PROSITE_PROFILES)	no GO terms	no GO terms
	VvCarFPS02VCR702_v1_PsGc_100.ver1_0.g001450.m01	VvCarFPS02VCR702_v1_PsGc_100.ver1_0.g001450	0	hypothetical protein POPTR_0004s11270g, partial	0	0	0	0	no IPS match	no IPS match	no IPS match
	VvCarFPS02VCR702_v1_PsGc_100.ver1_0.g001460.m01	VvCarFPS02VCR702_v1_PsGc_100.ver1_0.g001460	0	L-type lectin-domain containing receptor kinase -like	F:GO:0000166 | C:GO:0016020 | P:GO:0006464 | F:GO:0030246 | F:GO:0016301	F:nucleotide binding | C:membrane | P:cellular protein modification process | F:carbohydrate binding | F:kinase activity	0	0	IPR000719 (SMART) | G3DSA:2.60.120.200 (GENE3D) | IPR001220 (PFAM) | G3DSA:3.30.200.20 (GENE3D) | G3DSA:1.10.510.10 (GENE3D) | IPR000719 (PFAM) | PTHR27007 (PANTHER) | PTHR27007:SF43 (PANTHER) | IPR017441 (PROSITE_PATTERNS) | IPR008271 (PROSITE_PATTERNS) | IPR000719 (PROSITE_PROFILES) | IPR011009 (SUPERFAMILY) | IPR013320 (SUPERFAMILY) | TMhelix (TMHMM)	F:GO:0005524 | F:GO:0004672 | P:GO:0006468 | F:GO:0030246	F:ATP binding	P:protein phosphorylation	F:carbohydrate binding
	VvCarFPS02VCR702_v1_PsGc_100.ver1_0.g001470.m01	VvCarFPS02VCR702_v1_PsGc_100.ver1_0.g001470	0	L-type lectin-domain containing receptor kinase -like	F:GO:0000166 | C:GO:0016020 | P:GO:0006464 | F:GO:0030246 | F:GO:0016301	F:nucleotide binding | C:membrane | P:cellular protein modification process | F:carbohydrate binding | F:kinase activity	0	0	IPR000719 (SMART) | G3DSA:2.60.120.200 (GENE3D) | IPR000719 (PFAM) | IPR001220 (PFAM) | G3DSA:1.10.510.10 (GENE3D) | G3DSA:3.30.200.20 (GENE3D) | PTHR27007:SF43 (PANTHER) | PTHR27007 (PANTHER) | IPR008271 (PROSITE_PATTERNS) | IPR017441 (PROSITE_PATTERNS) | IPR000719 (PROSITE_PROFILES) | IPR001220 (CDD) | cd14066 (CDD) | SignalP-TM (SIGNALP_GRAM_POSITIVE) | SignalP-noTM (SIGNALP_EUK) | IPR013320 (…	F:GO:0005524 | F:GO:0004672 | P:GO:0006468 | F:GO:0030246	F:ATP binding	P:protein phosphorylation	F:carbohydrate binding
	VvCarFPS02VCR702_v1_PsGc_100.ver1_0.g001480.m01	VvCarFPS02VCR702_v1_PsGc_100.ver1_0.g001480	0	thioredoxin chloroplastic	0	0	0	0	no IPS match	no IPS match	no IPS match
	VvCarFPS02VCR702_v1_PsGc_100.ver1_0.g001490.m01	VvCarFPS02VCR702_v1_PsGc_100.ver1_0.g001490	0	L-type lectin-domain containing receptor kinase -like	0	0	0	0	G3DSA:1.10.510.10 (GENE3D) | PTHR27007:SF43 (PANTHER) | PTHR27007 (PANTHER) | IPR011009 (SUPERFAMILY)	no GO terms	no GO terms
	VvCarFPS02VCR702_v1_PsGc_100.ver1_0.g001500.m01	VvCarFPS02VCR702_v1_PsGc_100.ver1_0.g001500	0	L-type lectin-domain containing receptor kinase -like	F:GO:0000166 | C:GO:0016020 | P:GO:0006464 | F:GO:0030246 | F:GO:0016301	F:nucleotide binding | C:membrane | P:cellular protein modification process | F:carbohydrate binding | F:kinase activity	0	0	IPR000719 (SMART) | G3DSA:2.60.120.200 (GENE3D) | IPR000719 (PFAM) | G3DSA:3.30.200.20 (GENE3D) | G3DSA:1.10.510.10 (GENE3D) | IPR001220 (PFAM) | PTHR27007:SF43 (PANTHER) | PTHR27007 (PANTHER) | IPR008271 (PROSITE_PATTERNS) | IPR017441 (PROSITE_PATTERNS) | IPR000719 (PROSITE_PROFILES) | cd14066 (CDD) | IPR001220 (CDD) | SignalP-TM (SIGNALP_EUK) | IPR013320 (SUPERFAMILY) | IPR011009 (SUPERFAMILY) …	F:GO:0005524 | F:GO:0004672 | P:GO:0006468 | F:GO:0030246	F:ATP binding	P:protein phosphorylation	F:carbohydrate binding
	VvCarFPS02VCR702_v1_PsGc_100.ver1_0.g001510.m01	VvCarFPS02VCR702_v1_PsGc_100.ver1_0.g001510	0	importin subunit beta-1-like	F:GO:0005515 | C:GO:0005737 | P:GO:0006810 | F:GO:0005215	F:protein binding | C:cytoplasm | P:transport | F:transporter activity	0	0	IPR001494 (SMART) | IPR011989 (G3DSA:1.25.10.GENE3D) | IPR001494 (PFAM) | PF13513 (PFAM) | mobidb-lite (MOBIDB_LITE) | IPR027140 (PTHR10527:PANTHER) | PTHR10527 (PANTHER) | IPR001494 (PROSITE_PROFILES) | IPR016024 (SUPERFAMILY)	P:GO:0006913 | F:GO:0008565 | P:GO:0006886 | F:GO:0005488 | F:GO:0008536	P:nucleocytoplasmic transport	P:intracellular protein transport	F:binding	F:Ran GTPase binding
	VvCarFPS02VCR702_v1_PsGc_100.ver1_0.g001520.m01	VvCarFPS02VCR702_v1_PsGc_100.ver1_0.g001520	0	uncharacterized protein LOC109765942	0	0	0	0	mobidb-lite (MOBIDB_LITE)	no GO terms	no GO terms
	VvCarFPS02VCR702_v1_PsGc_100.ver1_0.g001530.m01	VvCarFPS02VCR702_v1_PsGc_100.ver1_0.g001530	0	ubiquitin-like modifier-activating enzyme atg7	C:GO:0005737 | P:GO:0009987	C:cytoplasm | P:cellular process	0	0	IPR032197 (PFAM) | G3DSA:3.40.140.70 (GENE3D) | IPR006285 (PTHR10953:PANTHER) | PTHR10953 (PANTHER)	C:GO:0005737 | P:GO:0006914	C:cytoplasm
	VvCarFPS02VCR702_v1_PsGc_100.ver1_0.g001540.m01	VvCarFPS02VCR702_v1_PsGc_100.ver1_0.g001540	0	S-isoprenylcysteine O-methyltransferase	C:GO:0016020 | P:GO:0006464 | C:GO:0005783 | F:GO:0016740	C:membrane | P:cellular protein modification process | C:endoplasmic reticulum | F:transferase activity	EC:2.1.1.100	Protein-S-isoprenylcysteine O-methyltransferase	IPR007269 (PFAM) | G3DSA:1.20.120.1630 (GENE3D) | PTHR12714 (PANTHER) | PTHR12714:SF9 (PANTHER) | IPR025770 (PROSITE_PROFILES) | TMhelix (TMHMM) | TMhelix (TMHMM) | TMhelix (TMHMM)	P:GO:0006481 | C:GO:0016021 | C:GO:0005783 | F:GO:0004671	P:C-terminal protein methylation	C:endoplasmic reticulum	F:protein C-terminal S-isoprenylcysteine carboxyl O-methyltransferase activity
	VvCarFPS02VCR702_v1_PsGc_100.ver1_0.g001550.m01	VvCarFPS02VCR702_v1_PsGc_100.ver1_0.g001550	0	tubby-like F-box 6	0	0	0	0	IPR000007 (PRINTS) | IPR000007 (PFAM) | IPR025659 (G3DSA:3.20.90.GENE3D) | PTHR16517 (PANTHER) | PTHR16517:SF36 (PANTHER) | IPR025659 (SUPERFAMILY)	no GO terms	no GO terms
	VvCarFPS02VCR702_v1_PsGc_100.ver1_0.g001560.m01	VvCarFPS02VCR702_v1_PsGc_100.ver1_0.g001560	0	sentrin-specific protease 2	0	0	0	0	mobidb-lite (MOBIDB_LITE) | mobidb-lite (MOBIDB_LITE) | SSF54001 (SUPERFAMILY)	no GO terms	no GO terms
	VvCarFPS02VCR702_v1_PsGc_100.ver1_0.g001570.m01	VvCarFPS02VCR702_v1_PsGc_100.ver1_0.g001570	0	DNAJ heat shock N-terminal domain-containing family	0	0	0	0	no IPS match	no IPS match	no IPS match
	VvCarFPS02VCR702_v1_PsGc_100.ver1_0.g001580.m01	VvCarFPS02VCR702_v1_PsGc_100.ver1_0.g001580	0	LRR receptor-like kinase family	F:GO:0000166 | F:GO:0005515 | C:GO:0016020 | P:GO:0006464 | F:GO:0016301	F:nucleotide binding | F:protein binding | C:membrane | P:cellular protein modification process | F:kinase activity	0	0	PR00019 (PRINTS) | IPR003591 (SMART) | IPR001611 (PFAM) | IPR032675 (G3DSA:3.80.10.GENE3D) | IPR000719 (PFAM) | IPR032675 (G3DSA:3.80.10.GENE3D) | IPR013210 (PFAM) | IPR001611 (PFAM) | G3DSA:3.30.200.20 (GENE3D) | G3DSA:1.10.510.10 (GENE3D) | IPR032675 (G3DSA:3.80.10.GENE3D) | PTHR27000:SF241 (PANTHER) | PTHR27000 (PANTHER) | PTHR27000:SF241 (PANTHER) | IPR017441 (PROSITE_PATTERNS) | IPR008266 (P…	F:GO:0005524 | F:GO:0005515 | F:GO:0004672 | P:GO:0006468	F:ATP binding	F:protein kinase activity	P:protein phosphorylation
	VvCarFPS02VCR702_v1_PsGc_100.ver1_0.g001590.m01	VvCarFPS02VCR702_v1_PsGc_100.ver1_0.g001590	0	LRR receptor-like kinase family	F:GO:0000166 | F:GO:0005515 | C:GO:0016020 | P:GO:0006464 | F:GO:0016301	F:nucleotide binding | F:protein binding | C:membrane | P:cellular protein modification process | F:kinase activity	0	0	PR00019 (PRINTS) | IPR003591 (SMART) | IPR025875 (PFAM) | G3DSA:1.10.510.10 (GENE3D) | IPR032675 (G3DSA:3.80.10.GENE3D) | IPR001611 (PFAM) | G3DSA:3.30.200.20 (GENE3D) | IPR000719 (PFAM) | IPR032675 (G3DSA:3.80.10.GENE3D) | PTHR27000 (PANTHER) | PTHR27000:SF241 (PANTHER) | PTHR27000:SF241 (PANTHER) | PTHR27000 (PANTHER) | IPR017441 (PROSITE_PATTERNS) | IPR008266 (PROSITE_PATTERNS) | IPR001611 (PR…	F:GO:0005524 | F:GO:0005515 | F:GO:0004672 | P:GO:0006468	F:ATP binding	F:protein kinase activity	P:protein phosphorylation
	VvCarFPS02VCR702_v1_PsGc_1000.ver1_0.g001600.m01	VvCarFPS02VCR702_v1_PsGc_1000.ver1_0.g001600	0	orf490 (mitochondrion)	0	0	0	0	PTHR11439 (PANTHER) | PTHR11439:SF204 (PANTHER) | SSF56672 (SUPERFAMILY)	no GO terms	no GO terms
	VvCarFPS02VCR702_v1_PsGc_1000.ver1_0.g001610.m01	VvCarFPS02VCR702_v1_PsGc_1000.ver1_0.g001610	0	orf490 (mitochondrion)	0	0	0	0	IPR013103 (PFAM) | mobidb-lite (MOBIDB_LITE) | PTHR11439:SF204 (PANTHER) | PTHR11439 (PANTHER)	no GO terms	no GO terms
	VvCarFPS02VCR702_v1_PsGc_1000.ver1_0.g001620.m01	VvCarFPS02VCR702_v1_PsGc_1000.ver1_0.g001620	0	uncharacterized protein LOC109724777	0	0	0	0	PF14223 (PFAM) | mobidb-lite (MOBIDB_LITE) | PTHR11439 (PANTHER) | PTHR11439:SF232 (PANTHER)	no GO terms	no GO terms
	VvCarFPS02VCR702_v1_PsGc_1000.ver1_0.g001630.m01	VvCarFPS02VCR702_v1_PsGc_1000.ver1_0.g001630	0	hypothetical protein CICLE_v10019422mg	C:GO:0005634	C:nucleus	0	0	mobidb-lite (MOBIDB_LITE) | PTHR13052:SF1 (PANTHER) | IPR024867 (PANTHER)	C:GO:0031011	C:Ino80 complex
	VvCarFPS02VCR702_v1_PsGc_1002.ver1_0.g001640.m01	VvCarFPS02VCR702_v1_PsGc_1002.ver1_0.g001640	0	hypothetical protein CICLE_v10031733mg	0	0	0	0	mobidb-lite (MOBIDB_LITE)	no GO terms	no GO terms
	VvCarFPS02VCR702_v1_PsGc_1003.ver1_0.g001650.m01	VvCarFPS02VCR702_v1_PsGc_1003.ver1_0.g001650	0	NADH-ubiquinone oxidoreductase 19 kDa subunit family	C:GO:0016020 | C:GO:0005739	C:membrane | C:mitochondrion	0	0	IPR010625 (PFAM) | PTHR13344 (PANTHER) | PTHR13344:SF2 (PANTHER) | PS51808 (PROSITE_PROFILES) | PS51808 (PROSITE_PROFILES)	no GO terms	no GO terms
	VvCarFPS02VCR702_v1_PsGc_1003.ver1_0.g001660.m01	VvCarFPS02VCR702_v1_PsGc_1003.ver1_0.g001660	0	squamosa promoter-binding	C:GO:0005634 | F:GO:0003677 | C:GO:0016020	C:nucleus | F:DNA binding | C:membrane	0	0	IPR036893 (G3DSA:4.10.1100.GENE3D) | IPR004333 (PFAM) | mobidb-lite (MOBIDB_LITE) | mobidb-lite (MOBIDB_LITE) | PTHR31251:SF2 (PANTHER) | PTHR31251 (PANTHER) | IPR004333 (PROSITE_PROFILES) | IPR036893 (SUPERFAMILY) | TMhelix (TMHMM)	C:GO:0005634 | F:GO:0003677	C:nucleus
	VvCarFPS02VCR702_v1_PsGc_1003.ver1_0.g001670.m01	VvCarFPS02VCR702_v1_PsGc_1003.ver1_0.g001670	0	sugar porter (SP) family MFS transporter	C:GO:0016020 | P:GO:0006810 | F:GO:0005215	C:membrane | P:transport | F:transporter activity	0	0	IPR003663 (PRINTS) | IPR003663 (TIGRFAM) | G3DSA:1.20.1250.20 (GENE3D) | IPR005828 (PFAM) | PTHR23500 (PANTHER) | PTHR23500:SF112 (PANTHER) | IPR020846 (PROSITE_PROFILES) | IPR020846 (CDD) | IPR036259 (SUPERFAMILY) | TMhelix (TMHMM) | TMhelix (TMHMM) | TMhelix (TMHMM) | TMhelix (TMHMM) | TMhelix (TMHMM) | TMhelix (TMHMM) | TMhelix (TMHMM) | TMhelix (TMHMM) | TMhelix (TMHMM) | TMhelix (TMHMM) | TM…	P:GO:0055085 | F:GO:0022857 | C:GO:0016020 | C:GO:0016021	P:transmembrane transport	C:membrane	C:integral component of membrane
	VvCarFPS02VCR702_v1_PsGc_1003.ver1_0.g001680.m01	VvCarFPS02VCR702_v1_PsGc_1003.ver1_0.g001680	0	Low-density receptor	C:GO:0016020	C:membrane	0	0	TMhelix (TMHMM)	no GO terms	no GO terms
	VvCarFPS02VCR702_v1_PsGc_1004.ver1_0.g001690.m01	VvCarFPS02VCR702_v1_PsGc_1004.ver1_0.g001690	0	ATP-dependent RNA helicase DHX36	F:GO:0016787	F:hydrolase activity	EC:3.6.1.15	Nucleoside-triphosphate phosphatase	Coil (COILS) | IPR007502 (SMART) | IPR001650 (SMART) | IPR007502 (PFAM) | G3DSA:1.20.120.1080 (GENE3D) | IPR011709 (PFAM) | IPR001650 (PFAM) | G3DSA:3.40.50.300 (GENE3D) | PTHR18934 (PANTHER) | PTHR18934:SF191 (PANTHER) | IPR001650 (PROSITE_PROFILES) | IPR027417 (SUPERFAMILY)	F:GO:0004386	F:helicase activity
	VvCarFPS02VCR702_v1_PsGc_1004.ver1_0.g001700.m01	VvCarFPS02VCR702_v1_PsGc_1004.ver1_0.g001700	0	ATP-dependent RNA helicase DHX36	F:GO:0003676 | F:GO:0000166 | F:GO:0016787	F:nucleic acid binding | F:nucleotide binding | F:hydrolase activity	EC:3.6.1.15	Nucleoside-triphosphate phosphatase	IPR014001 (SMART) | G3DSA:3.40.50.300 (GENE3D) | IPR011545 (PFAM) | PTHR18934:SF191 (PANTHER) | PTHR18934 (PANTHER) | IPR002464 (PROSITE_PATTERNS) | IPR014001 (PROSITE_PROFILES) | cd00046 (CDD) | IPR027417 (SUPERFAMILY)	F:GO:0003676 | F:GO:0005524	F:nucleic acid binding
	VvCarFPS02VCR702_v1_PsGc_1004.ver1_0.g001710.m01	VvCarFPS02VCR702_v1_PsGc_1004.ver1_0.g001710	0	RNA helicase family	0	0	0	0	mobidb-lite (MOBIDB_LITE) | PTHR18934:SF191 (PANTHER) | PTHR18934 (PANTHER)	no GO terms	no GO terms
	VvCarFPS02VCR702_v1_PsGc_1004.ver1_0.g001720.m01	VvCarFPS02VCR702_v1_PsGc_1004.ver1_0.g001720	0	calcium-dependent kinase 1-like	F:GO:0000166 | C:GO:0005737 | P:GO:0006464 | F:GO:0016301	F:nucleotide binding | C:cytoplasm | P:cellular protein modification process | F:kinase activity	0	0	IPR002048 (SMART) | IPR000719 (SMART) | IPR002048 (PFAM) | PIRSF000654 (PIRSF) | G3DSA:1.10.510.10 (GENE3D) | G3DSA:1.10.238.10 (GENE3D) | IPR000719 (PFAM) | G3DSA:3.30.200.20 (GENE3D) | PTHR24349:SF161 (PANTHER) | PTHR24349 (PANTHER) | IPR008271 (PROSITE_PATTERNS) | IPR018247 (PROSITE_PATTERNS) | IPR018247 (PROSITE_PATTERNS) | IPR018247 (PROSITE_PATTERNS) | IPR018247 (PROSITE_PATTERNS) | IPR0020…	F:GO:0005524 | F:GO:0005509 | F:GO:0004672 | P:GO:0006468	F:ATP binding	F:protein kinase activity	P:protein phosphorylation
	VvCarFPS02VCR702_v1_PsGc_1004.ver1_0.g001730.m01	VvCarFPS02VCR702_v1_PsGc_1004.ver1_0.g001730	0	calcium-dependent kinase 1-like	0	0	0	0	mobidb-lite (MOBIDB_LITE) | PTHR24349 (PANTHER) | PTHR24349:SF161 (PANTHER)	no GO terms	no GO terms
	VvCarFPS02VCR702_v1_PsGc_1004.ver1_0.g001740.m01	VvCarFPS02VCR702_v1_PsGc_1004.ver1_0.g001740	0	Mal D 1-associated	C:GO:0005634	C:nucleus	0	0	mobidb-lite (MOBIDB_LITE) | mobidb-lite (MOBIDB_LITE) | PTHR35722 (PANTHER)	no GO terms	no GO terms
	VvCarFPS02VCR702_v1_PsGc_1004.ver1_0.g001750.m01	VvCarFPS02VCR702_v1_PsGc_1004.ver1_0.g001750	0	nuclear transcription factor Y subunit A-10-like	F:GO:0003700 | P:GO:0009058 | P:GO:0006139 | C:GO:0005622	F:transcription factor activity, sequence-specific DNA binding | P:biosynthetic process | P:nucleobase-containing compound metabolic process | C:intracellular	0	0	mobidb-lite (MOBIDB_LITE) | PTHR12632:SF7 (PANTHER) | IPR001289 (PANTHER)	F:GO:0003700 | P:GO:0006355	F:transcription factor activity, sequence-specific DNA binding
	VvCarFPS02VCR702_v1_PsGc_1004.ver1_0.g001760.m01	VvCarFPS02VCR702_v1_PsGc_1004.ver1_0.g001760	0	hypothetical protein PHAVU_002G020300g	0	0	0	0	Coil (COILS) | mobidb-lite (MOBIDB_LITE)	no GO terms	no GO terms
	VvCarFPS02VCR702_v1_PsGc_1004.ver1_0.g001770.m01	VvCarFPS02VCR702_v1_PsGc_1004.ver1_0.g001770	0	33 kDa ribonucleo	F:GO:0003676 | C:GO:0005622	F:nucleic acid binding | C:intracellular	0	0	IPR000504 (SMART) | IPR000504 (PFAM) | IPR012677 (G3DSA:3.30.70.GENE3D) | mobidb-lite (MOBIDB_LITE) | PTHR44202 (PANTHER) | IPR000504 (PROSITE_PROFILES) | IPR000504 (PROSITE_PROFILES) | IPR035979 (SUPERFAMILY) | IPR035979 (SUPERFAMILY)	F:GO:0003676	F:nucleic acid binding
	VvCarFPS02VCR702_v1_PsGc_1004.ver1_0.g001780.m01	VvCarFPS02VCR702_v1_PsGc_1004.ver1_0.g001780	0	deoxyribonuclease TATDN1	P:GO:0009056 | F:GO:0004518 | P:GO:0006259	P:catabolic process | F:nuclease activity | P:DNA metabolic process	EC:3.1.30 | EC:3.1.21	Acting on ester bonds | Acting on ester bonds	G3DSA:3.20.20.140 (GENE3D) | IPR001130 (PFAM) | IPR001130 (PIRSF) | IPR001130 (PANTHER) | PTHR10060:SF15 (PANTHER) | IPR018228 (PROSITE_PATTERNS) | IPR018228 (PROSITE_PATTERNS) | IPR001130 (CDD) | IPR032466 (SUPERFAMILY)	F:GO:0016788 | F:GO:0016888	F:hydrolase activity, acting on ester bonds
	VvCarFPS02VCR702_v1_PsGc_1004.ver1_0.g001790.m01	VvCarFPS02VCR702_v1_PsGc_1004.ver1_0.g001790	0	syntaxin of plants 122	F:GO:0005515 | C:GO:0016020 | P:GO:0006810 | C:GO:0005622	F:protein binding | C:membrane | P:transport | C:intracellular	0	0	Coil (COILS) | Coil (COILS) | IPR000727 (SMART) | IPR006011 (SMART) | IPR000727 (PFAM) | G3DSA:1.20.5.110 (GENE3D) | G3DSA:1.20.58.70 (GENE3D) | IPR006011 (PFAM) | mobidb-lite (MOBIDB_LITE) | mobidb-lite (MOBIDB_LITE) | PTHR19957:SF69 (PANTHER) | PTHR19957 (PANTHER) | IPR006012 (PROSITE_PATTERNS) | IPR000727 (PROSITE_PROFILES) | cd15848 (CDD) | cd00179 (CDD) | IPR010989 (SUPERFAMILY) | TMhelix (T…	P:GO:0016192 | C:GO:0016020 | F:GO:0005484 | P:GO:0006886	P:vesicle-mediated transport	F:SNAP receptor activity	P:intracellular protein transport
	VvCarFPS02VCR702_v1_PsGc_1004.ver1_0.g001800.m01	VvCarFPS02VCR702_v1_PsGc_1004.ver1_0.g001800	0	trafficking particle complex	0	0	0	0	IPR024420 (PANTHER)	no GO terms	no GO terms
	VvCarFPS02VCR702_v1_PsGc_1005.ver1_0.g001810.m01	VvCarFPS02VCR702_v1_PsGc_1005.ver1_0.g001810	0	NRT1 PTR FAMILY -like	C:GO:0016020 | P:GO:0006810 | F:GO:0005215	C:membrane | P:transport | F:transporter activity	0	0	IPR000109 (PFAM) | mobidb-lite (MOBIDB_LITE) | PTHR11654:SF19 (PANTHER) | IPR000109 (PANTHER) | IPR020846 (CDD) | IPR036259 (SUPERFAMILY) | TMhelix (TMHMM) | TMhelix (TMHMM) | TMhelix (TMHMM) | TMhelix (TMHMM) | TMhelix (TMHMM) | TMhelix (TMHMM) | TMhelix (TMHMM) | TMhelix (TMHMM) | TMhelix (TMHMM) | TMhelix (TMHMM)	P:GO:0055085 | F:GO:0022857 | C:GO:0016020	P:transmembrane transport	C:membrane
	VvCarFPS02VCR702_v1_PsGc_1005.ver1_0.g001820.m01	VvCarFPS02VCR702_v1_PsGc_1005.ver1_0.g001820	0	mitogen-activated kinase 3	F:GO:0000166 | C:GO:0005737 | P:GO:0007165 | P:GO:0006464 | F:GO:0004871 | F:GO:0016301	F:nucleotide binding | C:cytoplasm | P:signal transduction | P:cellular protein modification process | F:signal transducer activity | F:kinase activity	EC:2.7.11 | EC:2.7.11.24	Transferring phosphorus-containing groups | Mitogen-activated protein kinase	IPR000719 (SMART) | G3DSA:1.10.510.10 (GENE3D) | PIRSF000654 (PIRSF) | IPR000719 (PFAM) | G3DSA:3.30.200.20 (GENE3D) | PTHR24055 (PANTHER) | PTHR24055:SF214 (PANTHER) | IPR003527 (PROSITE_PATTERNS) | IPR008271 (PROSITE_PATTERNS) | IPR017441 (PROSITE_PATTERNS) | IPR000719 (PROSITE_PROFILES) | cd07858 (CDD) | IPR011009 (SUPERFAMILY)	F:GO:0005524 | F:GO:0004707 | F:GO:0004672 | P:GO:0006468	F:ATP binding	F:protein kinase activity	P:protein phosphorylation
	VvCarFPS02VCR702_v1_PsGc_1005.ver1_0.g001830.m01	VvCarFPS02VCR702_v1_PsGc_1005.ver1_0.g001830	0	ascorbate peroxidase 1	F:GO:0003824 | P:GO:0008152 | F:GO:0005488 | P:GO:0044710 | P:GO:0006950	F:catalytic activity | P:metabolic process | F:binding | P:single-organism metabolic process | P:response to stress	EC:1.11.1.7	Peroxidase	Coil (COILS) | IPR002016 (PRINTS) | IPR002207 (PRINTS) | G3DSA:1.10.420.10 (GENE3D) | IPR002016 (PFAM) | G3DSA:1.10.520.10 (GENE3D) | mobidb-lite (MOBIDB_LITE) | PTHR31356:SF17 (PANTHER) | PTHR31356 (PANTHER) | IPR019794 (PROSITE_PATTERNS) | IPR019793 (PROSITE_PATTERNS) | IPR002016 (PROSITE_PROFILES) | cd00691 (CDD) | IPR010255 (SUPERFAMILY)	F:GO:0004601 | P:GO:0006979 | P:GO:0055114 | F:GO:0020037	F:peroxidase activity	P:oxidation-reduction process	F:heme binding
	VvCarFPS02VCR702_v1_PsGc_1005.ver1_0.g001840.m01	VvCarFPS02VCR702_v1_PsGc_1005.ver1_0.g001840	0	RNA binding (RRM RBD RNP motifs) family	F:GO:0003676	F:nucleic acid binding	0	0	IPR003954 (SMART) | IPR012677 (G3DSA:3.30.70.GENE3D) | PF14570 (PFAM) | IPR000504 (PFAM) | IPR013083 (G3DSA:3.30.40.GENE3D) | PTHR12603:SF6 (PANTHER) | PTHR12603 (PANTHER) | IPR001841 (PROSITE_PROFILES) | IPR000504 (PROSITE_PROFILES) | IPR034261 (CDD) | cd16618 (CDD) | SSF57850 (SUPERFAMILY) | IPR035979 (SUPERFAMILY)	F:GO:0003676	F:nucleic acid binding
	VvCarFPS02VCR702_v1_PsGc_1006.ver1_0.g001850.m01	VvCarFPS02VCR702_v1_PsGc_1006.ver1_0.g001850	0	feruloyl ortho-hydroxylase 2-like isoform X1	F:GO:0003824 | P:GO:0008152 | F:GO:0005488 | P:GO:0044710	F:catalytic activity | P:metabolic process | F:binding | P:single-organism metabolic process	0	0	IPR005123 (PFAM) | IPR026992 (PFAM) | IPR027443 (G3DSA:2.60.120.GENE3D) | PTHR10209:SF113 (PANTHER) | PTHR10209 (PANTHER) | IPR005123 (PROSITE_PROFILES) | SSF51197 (SUPERFAMILY)	F:GO:0016491 | P:GO:0055114	F:oxidoreductase activity
	VvCarFPS02VCR702_v1_PsGc_1006.ver1_0.g001860.m01	VvCarFPS02VCR702_v1_PsGc_1006.ver1_0.g001860	0	feruloyl ortho-hydroxylase 2-like isoform X1	F:GO:0003824 | P:GO:0008152 | P:GO:0044710	F:catalytic activity | P:metabolic process | P:single-organism metabolic process	0	0	IPR005123 (PFAM) | IPR027443 (G3DSA:2.60.120.GENE3D) | PTHR10209:SF113 (PANTHER) | PTHR10209 (PANTHER) | IPR005123 (PROSITE_PROFILES) | SSF51197 (SUPERFAMILY)	F:GO:0016491 | P:GO:0055114	F:oxidoreductase activity
	VvCarFPS02VCR702_v1_PsGc_1006.ver1_0.g001870.m01	VvCarFPS02VCR702_v1_PsGc_1006.ver1_0.g001870	0	feruloyl ortho-hydroxylase 2-like isoform X1	0	0	0	0	PTHR10209:SF113 (PANTHER) | PTHR10209 (PANTHER)	no GO terms	no GO terms
	VvCarFPS02VCR702_v1_PsGc_1006.ver1_0.g001880.m01	VvCarFPS02VCR702_v1_PsGc_1006.ver1_0.g001880	0	BAG family molecular chaperone regulator 6	0	0	0	0	no IPS match	no IPS match	no IPS match
	VvCarFPS02VCR702_v1_PsGc_1006.ver1_0.g001890.m01	VvCarFPS02VCR702_v1_PsGc_1006.ver1_0.g001890	0	Ankyrin repeat-containing	0	0	0	0	IPR036770 (G3DSA:1.25.40.GENE3D)	no GO terms	no GO terms
	VvCarFPS02VCR702_v1_PsGc_1006.ver1_0.g001900.m01	VvCarFPS02VCR702_v1_PsGc_1006.ver1_0.g001900	0	Vinorine synthase	F:GO:0016740	F:transferase activity	0	0	IPR003480 (PFAM) | IPR023213 (G3DSA:3.30.559.GENE3D) | IPR023213 (G3DSA:3.30.559.GENE3D) | PTHR31623 (PANTHER) | PTHR31623:SF3 (PANTHER)	F:GO:0016747	F:transferase activity, transferring acyl groups other than amino-acyl groups
	VvCarFPS02VCR702_v1_PsGc_1006.ver1_0.g001910.m01	VvCarFPS02VCR702_v1_PsGc_1006.ver1_0.g001910	0	Vinorine synthase	F:GO:0016740	F:transferase activity	0	0	IPR023213 (G3DSA:3.30.559.GENE3D) | IPR003480 (PFAM) | PTHR31623:SF3 (PANTHER) | PTHR31623 (PANTHER)	F:GO:0016747	F:transferase activity, transferring acyl groups other than amino-acyl groups
	VvCarFPS02VCR702_v1_PsGc_1006.ver1_0.g001920.m01	VvCarFPS02VCR702_v1_PsGc_1006.ver1_0.g001920	0	Vinorine synthase	F:GO:0016740	F:transferase activity	0	0	IPR003480 (PFAM) | IPR023213 (G3DSA:3.30.559.GENE3D) | PTHR31623:SF3 (PANTHER) | PTHR31623 (PANTHER)	F:GO:0016747	F:transferase activity, transferring acyl groups other than amino-acyl groups
	VvCarFPS02VCR702_v1_PsGc_1006.ver1_0.g001930.m01	VvCarFPS02VCR702_v1_PsGc_1006.ver1_0.g001930	0	HXXXD-type acyl-transferase family	0	0	0	0	PTHR31623:SF3 (PANTHER) | PTHR31623 (PANTHER)	no GO terms	no GO terms
	VvCarFPS02VCR702_v1_PsGc_1006.ver1_0.g001940.m01	VvCarFPS02VCR702_v1_PsGc_1006.ver1_0.g001940	0	transferase family	F:GO:0016740	F:transferase activity	0	0	IPR023213 (G3DSA:3.30.559.GENE3D) | IPR023213 (G3DSA:3.30.559.GENE3D) | IPR003480 (PFAM) | mobidb-lite (MOBIDB_LITE) | PTHR31623 (PANTHER) | PTHR31623:SF6 (PANTHER) | PTHR31623 (PANTHER) | PTHR31623:SF6 (PANTHER)	F:GO:0016747	F:transferase activity, transferring acyl groups other than amino-acyl groups
	VvCarFPS02VCR702_v1_PsGc_1006.ver1_0.g001950.m01	VvCarFPS02VCR702_v1_PsGc_1006.ver1_0.g001950	0	Salutaridinol 7-O-acetyltransferase	F:GO:0016740	F:transferase activity	0	0	IPR003480 (PFAM) | IPR023213 (G3DSA:3.30.559.GENE3D) | PTHR31623:SF15 (PANTHER) | PTHR31623 (PANTHER)	F:GO:0016747	F:transferase activity, transferring acyl groups other than amino-acyl groups
	VvCarFPS02VCR702_v1_PsGc_1006.ver1_0.g001960.m01	VvCarFPS02VCR702_v1_PsGc_1006.ver1_0.g001960	0	transferase family	0	0	0	0	IPR023213 (G3DSA:3.30.559.GENE3D)	no GO terms	no GO terms
	VvCarFPS02VCR702_v1_PsGc_1006.ver1_0.g001970.m01	VvCarFPS02VCR702_v1_PsGc_1006.ver1_0.g001970	0	Salutaridinol 7-O-acetyltransferase	F:GO:0016740	F:transferase activity	0	0	IPR023213 (G3DSA:3.30.559.GENE3D) | IPR003480 (PFAM) | PTHR31623 (PANTHER) | PTHR31623:SF15 (PANTHER)	F:GO:0016747	F:transferase activity, transferring acyl groups other than amino-acyl groups
	VvCarFPS02VCR702_v1_PsGc_1006.ver1_0.g001980.m01	VvCarFPS02VCR702_v1_PsGc_1006.ver1_0.g001980	0	transferase family	F:GO:0016740	F:transferase activity	0	0	IPR003480 (PFAM) | IPR023213 (G3DSA:3.30.559.GENE3D) | IPR023213 (G3DSA:3.30.559.GENE3D) | mobidb-lite (MOBIDB_LITE) | PTHR31623 (PANTHER)	F:GO:0016747	F:transferase activity, transferring acyl groups other than amino-acyl groups
	VvCarFPS02VCR702_v1_PsGc_1006.ver1_0.g001990.m01	VvCarFPS02VCR702_v1_PsGc_1006.ver1_0.g001990	0	serine threonine phosphatase 2A 57 kDa regulatory subunit B theta isoform-like	P:GO:0007165 | F:GO:0005488 | F:GO:0030234 | C:GO:0005622	P:signal transduction | F:binding | F:enzyme regulator activity | C:intracellular	0	0	IPR002554 (PIRSF) | IPR011989 (G3DSA:1.25.10.GENE3D) | IPR002554 (PFAM) | PTHR10257:SF46 (PANTHER) | IPR002554 (PANTHER) | IPR016024 (SUPERFAMILY)	P:GO:0007165 | C:GO:0000159 | F:GO:0005488 | F:GO:0019888	P:signal transduction	F:binding	F:protein phosphatase regulator activity
	VvCarFPS02VCR702_v1_PsGc_1006.ver1_0.g002000.m01	VvCarFPS02VCR702_v1_PsGc_1006.ver1_0.g002000	0	zincin-like metalloproteases family	P:GO:0019538 | F:GO:0005488 | F:GO:0016787	P:protein metabolic process | F:binding | F:hydrolase activity	EC:3.4.24	Acting on peptide bonds (peptidases)	Coil (COILS) | IPR024079 (G3DSA:3.40.390.GENE3D) | IPR024080 (G3DSA:1.20.1050.GENE3D) | IPR001567 (PFAM) | IPR024077 (G3DSA:1.10.1370.GENE3D) | PTHR11804:SF40 (PANTHER) | PTHR11804 (PANTHER) | cd06455 (CDD) | SignalP-TM (SIGNALP_GRAM_POSITIVE) | SSF55486 (SUPERFAMILY) | TMhelix (TMHMM)	P:GO:0006508 | F:GO:0004222 | F:GO:0008237	P:proteolysis	F:metallopeptidase activity
	VvCarFPS02VCR702_v1_PsGc_1006.ver1_0.g002010.m01	VvCarFPS02VCR702_v1_PsGc_1006.ver1_0.g002010	0	signal recognition particle subunit SRP72-like	F:GO:0005515 | F:GO:0003723 | C:GO:0005737 | P:GO:0006810	F:protein binding | F:RNA binding | C:cytoplasm | P:transport	0	0	IPR026270 (PIRSF) | IPR031545 (PFAM) | IPR013699 (PFAM) | IPR011990 (G3DSA:1.25.40.GENE3D) | mobidb-lite (MOBIDB_LITE) | mobidb-lite (MOBIDB_LITE) | IPR026270 (PANTHER) | IPR011990 (SUPERFAMILY) | IPR011990 (SUPERFAMILY)	P:GO:0006614 | F:GO:0005515 | C:GO:0048500 | F:GO:0008312	P:SRP-dependent cotranslational protein targeting to membrane	C:signal recognition particle	F:7S RNA binding
	VvCarFPS02VCR702_v1_PsGc_1006.ver1_0.g002020.m01	VvCarFPS02VCR702_v1_PsGc_1006.ver1_0.g002020	0	F-box SKIP14-like	F:GO:0005515 | C:GO:0005829	F:protein binding | C:cytosol	0	0	IPR001810 (PFAM) | PTHR44838:SF2 (PANTHER) | PTHR44838 (PANTHER) | IPR036047 (SUPERFAMILY) | SSF52047 (SUPERFAMILY)	F:GO:0005515	F:protein binding
	VvCarFPS02VCR702_v1_PsGc_1006.ver1_0.g002030.m01	VvCarFPS02VCR702_v1_PsGc_1006.ver1_0.g002030	0	plastid transcriptionally active	F:GO:0016740	F:transferase activity	0	0	PTHR37257 (PANTHER)	no GO terms	no GO terms
	VvCarFPS02VCR702_v1_PsGc_1006.ver1_0.g002040.m01	VvCarFPS02VCR702_v1_PsGc_1006.ver1_0.g002040	0	ankyrin repeat	0	0	0	0	mobidb-lite (MOBIDB_LITE) | PTHR33386 (PANTHER) | PTHR33386:SF1 (PANTHER)	no GO terms	no GO terms
	VvCarFPS02VCR702_v1_PsGc_1006.ver1_0.g002050.m01	VvCarFPS02VCR702_v1_PsGc_1006.ver1_0.g002050	0	Restriction type II-like superfamily	F:GO:0003677	F:DNA binding	0	0	IPR011604 (G3DSA:3.90.320.GENE3D) | IPR017482 (TIGRFAM) | IPR019080 (PFAM) | PTHR45494 (PANTHER) | IPR011335 (SUPERFAMILY)	no GO terms	no GO terms
	VvCarFPS02VCR702_v1_PsGc_1006.ver1_0.g002060.m01	VvCarFPS02VCR702_v1_PsGc_1006.ver1_0.g002060	0	Homeodomain-like superfamily	C:GO:0005634	C:nucleus	0	0	IPR001005 (SMART) | PF13837 (PFAM) | G3DSA:1.10.10.60 (GENE3D) | PTHR45169 (PANTHER) | IPR017877 (PROSITE_PROFILES) | cd12203 (CDD)	no GO terms	no GO terms
	VvCarFPS02VCR702_v1_PsGc_1006.ver1_0.g002070.m01	VvCarFPS02VCR702_v1_PsGc_1006.ver1_0.g002070	0	Mitotic spindle checkpoint MAD2	P:GO:0016043 | P:GO:0007049	P:cellular component organization | P:cell cycle	0	0	IPR036570 (G3DSA:3.30.900.GENE3D) | IPR003511 (PFAM) | PTHR11842 (PANTHER) | IPR027097 (PTHR11842:PANTHER) | IPR003511 (PROSITE_PROFILES) | IPR036570 (SUPERFAMILY)	P:GO:0007094	P:mitotic spindle assembly checkpoint
	VvCarFPS02VCR702_v1_PsGc_1006.ver1_0.g002080.m01	VvCarFPS02VCR702_v1_PsGc_1006.ver1_0.g002080	0	hypothetical protein PHAVU_011G080100g	0	0	0	0	no IPS match	no IPS match	no IPS match
	VvCarFPS02VCR702_v1_PsGc_1006.ver1_0.g002090.m01	VvCarFPS02VCR702_v1_PsGc_1006.ver1_0.g002090	0	ABC transporter C family member 5-like	0	0	0	0	PTHR24223:SF222 (PANTHER) | PTHR24223 (PANTHER) | TMhelix (TMHMM) | TMhelix (TMHMM)	no GO terms	no GO terms
	VvCarFPS02VCR702_v1_PsGc_1006.ver1_0.g002100.m01	VvCarFPS02VCR702_v1_PsGc_1006.ver1_0.g002100	0	ABC transporter C family member 3-like	F:GO:0000166 | C:GO:0016020 | P:GO:0006810 | F:GO:0005215 | F:GO:0016787	F:nucleotide binding | C:membrane | P:transport | F:transporter activity | F:hydrolase activity	EC:3.6.1.3 | EC:3.6.1.15	Adenosinetriphosphatase | Nucleoside-triphosphate phosphatase	IPR011527 (PFAM) | IPR036640 (G3DSA:1.20.1560.GENE3D) | PTHR24223 (PANTHER) | PTHR24223:SF222 (PANTHER) | IPR011527 (PROSITE_PROFILES) | IPR036640 (SUPERFAMILY) | TMhelix (TMHMM)	F:GO:0005524 | F:GO:0042626 | P:GO:0055085 | C:GO:0016021	F:ATP binding	P:transmembrane transport	C:integral component of membrane
	VvCarFPS02VCR702_v1_PsGc_1006.ver1_0.g002110.m01	VvCarFPS02VCR702_v1_PsGc_1006.ver1_0.g002110	0	multidrug resistance ABC transporter family	F:GO:0000166 | C:GO:0016020 | P:GO:0006810 | F:GO:0005215 | F:GO:0016787	F:nucleotide binding | C:membrane | P:transport | F:transporter activity | F:hydrolase activity	EC:3.6.1.3 | EC:3.6.1.15	Adenosinetriphosphatase | Nucleoside-triphosphate phosphatase	IPR036640 (G3DSA:1.20.1560.GENE3D) | IPR011527 (PFAM) | G3DSA:3.40.50.300 (GENE3D) | IPR003439 (PFAM) | PTHR24223 (PANTHER) | PTHR24223:SF222 (PANTHER) | IPR011527 (PROSITE_PROFILES) | IPR036640 (SUPERFAMILY) | IPR027417 (SUPERFAMILY) | TMhelix (TMHMM) | TMhelix (TMHMM) | TMhelix (TMHMM) | TMhelix (TMHMM)	F:GO:0016887 | F:GO:0005524 | F:GO:0042626 | P:GO:0055085 | C:GO:0016021	F:ATPase activity	F:ATPase activity, coupled to transmembrane movement of substances	P:transmembrane transport	C:integral component of membrane
	VvCarFPS02VCR702_v1_PsGc_1006.ver1_0.g002120.m01	VvCarFPS02VCR702_v1_PsGc_1006.ver1_0.g002120	0	ABC transporter C family member 15	F:GO:0000166 | C:GO:0016020 | F:GO:0016787	F:nucleotide binding | C:membrane | F:hydrolase activity	EC:3.6.1.3 | EC:3.6.1.15	Adenosinetriphosphatase | Nucleoside-triphosphate phosphatase	IPR003593 (SMART) | IPR003439 (PFAM) | G3DSA:3.40.50.300 (GENE3D) | PTHR24223:SF222 (PANTHER) | PTHR24223 (PANTHER) | IPR003439 (PROSITE_PROFILES) | cd03244 (CDD) | IPR036640 (SUPERFAMILY) | IPR027417 (SUPERFAMILY) | TMhelix (TMHMM)	F:GO:0016887 | F:GO:0005524 | C:GO:0016021	F:ATPase activity	C:integral component of membrane
	VvCarFPS02VCR702_v1_PsGc_1006.ver1_0.g002130.m01	VvCarFPS02VCR702_v1_PsGc_1006.ver1_0.g002130	0	NADH-ubiquinone reductase complex 1 MLRQ subunit	C:GO:0016020	C:membrane	0	0	IPR010530 (PFAM) | PTHR33417:SF7 (PANTHER) | PTHR33417 (PANTHER) | TMhelix (TMHMM)	no GO terms	no GO terms
	VvCarFPS02VCR702_v1_PsGc_1006.ver1_0.g002140.m01	VvCarFPS02VCR702_v1_PsGc_1006.ver1_0.g002140	0	glyceraldehyde-3-phosphate cytosolic-like	F:GO:0000166 | F:GO:0003824 | P:GO:0008152 | P:GO:0044710	F:nucleotide binding | F:catalytic activity | P:metabolic process | P:single-organism metabolic process	0	0	IPR020831 (PRINTS) | IPR020828 (SMART) | IPR020828 (PFAM) | G3DSA:3.30.360.10 (GENE3D) | IPR020829 (PFAM) | G3DSA:3.40.50.720 (GENE3D) | IPR020831 (PIRSF) | PTHR10836:SF63 (PANTHER) | IPR020831 (PANTHER) | SSF55347 (SUPERFAMILY) | IPR036291 (SUPERFAMILY)	P:GO:0055114 | F:GO:0016620	P:oxidation-reduction process
	VvCarFPS02VCR702_v1_PsGc_1006.ver1_0.g002150.m01	VvCarFPS02VCR702_v1_PsGc_1006.ver1_0.g002150	0	pentatricopeptide repeat-containing mitochondrial-like	F:GO:0005515 | C:GO:0005622	F:protein binding | C:intracellular	0	0	IPR002885 (TIGRFAM) | IPR002885 (PFAM) | IPR002885 (PFAM) | IPR011990 (G3DSA:1.25.40.GENE3D) | PTHR24015 (PANTHER) | PTHR24015:SF347 (PANTHER) | IPR002885 (PROSITE_PROFILES) | IPR002885 (PROSITE_PROFILES) | IPR002885 (PROSITE_PROFILES) | IPR002885 (PROSITE_PROFILES) | IPR002885 (PROSITE_PROFILES) | IPR002885 (PROSITE_PROFILES) | IPR002885 (PROSITE_PROFILES) | IPR002885 (PROSITE_PROFILES)	F:GO:0005515	F:protein binding
	VvCarFPS02VCR702_v1_PsGc_1006.ver1_0.g002160.m01	VvCarFPS02VCR702_v1_PsGc_1006.ver1_0.g002160	0	ankyrin repeat	F:GO:0005515 | F:GO:0003824	F:protein binding | F:catalytic activity	0	0	IPR002110 (SMART) | IPR036770 (G3DSA:1.25.40.GENE3D) | IPR036770 (G3DSA:1.25.40.GENE3D) | IPR002110 (PFAM) | IPR020683 (PFAM) | mobidb-lite (MOBIDB_LITE) | PTHR44515 (PANTHER) | PTHR44515:SF2 (PANTHER) | IPR020683 (PROSITE_PROFILES) | IPR002110 (PROSITE_PROFILES) | IPR020683 (CDD) | IPR020683 (CDD) | IPR020683 (CDD) | IPR036770 (SUPERFAMILY)	F:GO:0005515	F:protein binding
	VvCarFPS02VCR702_v1_PsGc_1006.ver1_0.g002170.m01	VvCarFPS02VCR702_v1_PsGc_1006.ver1_0.g002170	0	lysine histidine transporter 1-like	C:GO:0016020	C:membrane	0	0	IPR013057 (PFAM) | PTHR22950 (PANTHER) | PTHR22950:SF356 (PANTHER) | TMhelix (TMHMM) | TMhelix (TMHMM) | TMhelix (TMHMM) | TMhelix (TMHMM) | TMhelix (TMHMM) | TMhelix (TMHMM) | TMhelix (TMHMM) | TMhelix (TMHMM) | TMhelix (TMHMM)	no GO terms	no GO terms
	VvCarFPS02VCR702_v1_PsGc_1006.ver1_0.g002180.m01	VvCarFPS02VCR702_v1_PsGc_1006.ver1_0.g002180	0	transmembrane amino acid transporter family	C:GO:0016020	C:membrane	0	0	IPR013057 (PFAM) | PTHR22950 (PANTHER) | PTHR22950:SF356 (PANTHER)	no GO terms	no GO terms
	VvCarFPS02VCR702_v1_PsGc_1006.ver1_0.g002190.m01	VvCarFPS02VCR702_v1_PsGc_1006.ver1_0.g002190	0	lysine histidine transporter 1-like	C:GO:0016020	C:membrane	0	0	IPR013057 (PFAM) | PTHR22950 (PANTHER) | PTHR22950:SF356 (PANTHER) | TMhelix (TMHMM) | TMhelix (TMHMM) | TMhelix (TMHMM) | TMhelix (TMHMM) | TMhelix (TMHMM) | TMhelix (TMHMM) | TMhelix (TMHMM)	no GO terms	no GO terms
	VvCarFPS02VCR702_v1_PsGc_1006.ver1_0.g002200.m01	VvCarFPS02VCR702_v1_PsGc_1006.ver1_0.g002200	0	extracellular ligand-gated ion channel	C:GO:0016020	C:membrane	0	0	IPR021924 (PFAM) | PTHR31963:SF2 (PANTHER) | IPR021924 (PANTHER) | TMhelix (TMHMM) | TMhelix (TMHMM) | TMhelix (TMHMM) | TMhelix (TMHMM) | TMhelix (TMHMM) | TMhelix (TMHMM) | TMhelix (TMHMM)	no GO terms	no GO terms
	VvCarFPS02VCR702_v1_PsGc_1006.ver1_0.g002210.m01	VvCarFPS02VCR702_v1_PsGc_1006.ver1_0.g002210	0	hypothetical protein SELMODRAFT_442895	0	0	0	0	no IPS match	no IPS match	no IPS match
	VvCarFPS02VCR702_v1_PsGc_1006.ver1_0.g002220.m01	VvCarFPS02VCR702_v1_PsGc_1006.ver1_0.g002220	0	Cyclin-dependent kinase G-2	F:GO:0000166 | P:GO:0006464 | F:GO:0016301	F:nucleotide binding | P:cellular protein modification process | F:kinase activity	0	0	IPR000719 (SMART) | G3DSA:3.30.200.20 (GENE3D) | G3DSA:1.10.510.10 (GENE3D) | IPR000719 (PFAM) | mobidb-lite (MOBIDB_LITE) | mobidb-lite (MOBIDB_LITE) | PTHR24056 (PANTHER) | PTHR24056:SF332 (PANTHER) | IPR008271 (PROSITE_PATTERNS) | IPR000719 (PROSITE_PROFILES) | cd07843 (CDD) | IPR011009 (SUPERFAMILY)	F:GO:0005524 | F:GO:0004672 | P:GO:0006468	F:ATP binding	P:protein phosphorylation
	VvCarFPS02VCR702_v1_PsGc_1006.ver1_0.g002230.m01	VvCarFPS02VCR702_v1_PsGc_1006.ver1_0.g002230	0	Remorin family	C:GO:0005634	C:nucleus	0	0	Coil (COILS) | IPR005516 (PFAM) | mobidb-lite (MOBIDB_LITE) | mobidb-lite (MOBIDB_LITE) | PTHR31471:SF15 (PANTHER) | PTHR31471 (PANTHER)	no GO terms	no GO terms
	VvCarFPS02VCR702_v1_PsGc_1006.ver1_0.g002240.m01	VvCarFPS02VCR702_v1_PsGc_1006.ver1_0.g002240	0	FAD NAD(P)-binding oxidoreductase family	F:GO:0000166	F:nucleotide binding	0	0	PR00420 (PRINTS) | IPR002938 (PFAM) | IPR036188 (G3DSA:3.50.50.GENE3D) | G3DSA:3.40.30.120 (GENE3D) | G3DSA:3.30.9.50 (GENE3D) | mobidb-lite (MOBIDB_LITE) | PTHR43004:SF6 (PANTHER) | PTHR43004 (PANTHER) | IPR036188 (SUPERFAMILY) | TMhelix (TMHMM)	F:GO:0071949	F:FAD binding
	VvCarFPS02VCR702_v1_PsGc_1006.ver1_0.g002250.m01	VvCarFPS02VCR702_v1_PsGc_1006.ver1_0.g002250	0	Acid phosphatase vanadium-dependent haloperoxidase-related	C:GO:0016020	C:membrane	0	0	IPR003832 (PFAM) | mobidb-lite (MOBIDB_LITE) | IPR003832 (PANTHER) | PTHR31446:SF18 (PANTHER) | IPR036938 (SUPERFAMILY) | TMhelix (TMHMM) | TMhelix (TMHMM) | TMhelix (TMHMM)	no GO terms	no GO terms
	VvCarFPS02VCR702_v1_PsGc_1006.ver1_0.g002260.m01	VvCarFPS02VCR702_v1_PsGc_1006.ver1_0.g002260	0	ATP-dependent DNA helicase Q-like 5	F:GO:0003676 | F:GO:0000166 | P:GO:0006259 | C:GO:0005622 | F:GO:0016787	F:nucleic acid binding | F:nucleotide binding | P:DNA metabolic process | C:intracellular | F:hydrolase activity	EC:3.6.1.3 | EC:3.6.1.15	Adenosinetriphosphatase | Nucleoside-triphosphate phosphatase	IPR001650 (SMART) | IPR014001 (SMART) | IPR001650 (PFAM) | G3DSA:3.40.50.300 (GENE3D) | G3DSA:3.40.50.300 (GENE3D) | IPR011545 (PFAM) | IPR004589 (TIGRFAM) | PTHR13710:SF108 (PANTHER) | PTHR13710 (PANTHER) | IPR002464 (PROSITE_PATTERNS) | IPR014001 (PROSITE_PROFILES) | IPR001650 (PROSITE_PROFILES) | cd00046 (CDD) | IPR001650 (CDD) | IPR027417 (SUPERFAMILY)	F:GO:0003676 | F:GO:0005524 | P:GO:0006310 | F:GO:0008026	F:nucleic acid binding	P:DNA recombination	F:ATP-dependent helicase activity
	VvCarFPS02VCR702_v1_PsGc_1006.ver1_0.g002270.m01	VvCarFPS02VCR702_v1_PsGc_1006.ver1_0.g002270	0	cell division control 48 homolog C-like	F:GO:0000166	F:nucleotide binding	0	0	IPR003593 (SMART) | G3DSA:3.40.50.300 (GENE3D) | G3DSA:1.10.8.60 (GENE3D) | G3DSA:1.10.8.60 (GENE3D) | G3DSA:3.40.50.300 (GENE3D) | IPR003959 (PFAM) | IPR031996 (PFAM) | mobidb-lite (MOBIDB_LITE) | mobidb-lite (MOBIDB_LITE) | PTHR23077:SF55 (PANTHER) | PTHR23077 (PANTHER) | IPR003960 (PROSITE_PATTERNS) | IPR003960 (PROSITE_PATTERNS) | cd00009 (CDD) | cd00009 (CDD) | IPR027417 (SUPERFAMILY) | IPR0…	F:GO:0005524	F:ATP binding
	VvCarFPS02VCR702_v1_PsGc_1006.ver1_0.g002280.m01	VvCarFPS02VCR702_v1_PsGc_1006.ver1_0.g002280	0	flocculation FLO11-like	C:GO:0005886	C:plasma membrane	0	0	mobidb-lite (MOBIDB_LITE) | mobidb-lite (MOBIDB_LITE) | mobidb-lite (MOBIDB_LITE) | mobidb-lite (MOBIDB_LITE) | mobidb-lite (MOBIDB_LITE) | mobidb-lite (MOBIDB_LITE) | PTHR31949 (PANTHER) | PTHR31949:SF3 (PANTHER)	no GO terms	no GO terms
	VvCarFPS02VCR702_v1_PsGc_1006.ver1_0.g002290.m01	VvCarFPS02VCR702_v1_PsGc_1006.ver1_0.g002290	0	Iojap- mitochondrial	C:GO:0005739	C:mitochondrion	0	0	PF02410 (PFAM) | G3DSA:3.30.460.10 (GENE3D) | IPR004394 (TIGRFAM) | IPR004394 (PANTHER) | PTHR21043:SF0 (PANTHER) | SSF81301 (SUPERFAMILY)	no GO terms	no GO terms
	VvCarFPS02VCR702_v1_PsGc_1006.ver1_0.g002300.m01	VvCarFPS02VCR702_v1_PsGc_1006.ver1_0.g002300	0	Transmembrane amino acid transporter family	C:GO:0016020	C:membrane	0	0	IPR013057 (PFAM) | PTHR22950 (PANTHER) | PTHR22950:SF356 (PANTHER) | TMhelix (TMHMM) | TMhelix (TMHMM) | TMhelix (TMHMM)	no GO terms	no GO terms
	VvCarFPS02VCR702_v1_PsGc_1006.ver1_0.g002310.m01	VvCarFPS02VCR702_v1_PsGc_1006.ver1_0.g002310	0	lysine histidine transporter 1-like	C:GO:0016020	C:membrane	0	0	IPR013057 (PFAM) | PTHR22950 (PANTHER) | PTHR22950:SF356 (PANTHER) | TMhelix (TMHMM) | TMhelix (TMHMM) | TMhelix (TMHMM) | TMhelix (TMHMM) | TMhelix (TMHMM) | TMhelix (TMHMM) | TMhelix (TMHMM) | TMhelix (TMHMM) | TMhelix (TMHMM) | TMhelix (TMHMM) | TMhelix (TMHMM)	no GO terms	no GO terms
	VvCarFPS02VCR702_v1_PsGc_1006.ver1_0.g002320.m01	VvCarFPS02VCR702_v1_PsGc_1006.ver1_0.g002320	0	transmembrane amino acid transporter family	0	0	0	0	IPR013057 (PFAM) | PTHR22950:SF356 (PANTHER) | PTHR22950 (PANTHER) | TMhelix (TMHMM)	no GO terms	no GO terms
	VvCarFPS02VCR702_v1_PsGc_1006.ver1_0.g002330.m01	VvCarFPS02VCR702_v1_PsGc_1006.ver1_0.g002330	0	mitochondrial chaperone bcs1	0	0	0	0	mobidb-lite (MOBIDB_LITE) | PTHR23070 (PANTHER) | PTHR23070:SF49 (PANTHER) | PTHR23070:SF49 (PANTHER) | PTHR23070 (PANTHER)	no GO terms	no GO terms
	VvCarFPS02VCR702_v1_PsGc_1006.ver1_0.g002340.m01	VvCarFPS02VCR702_v1_PsGc_1006.ver1_0.g002340	0	lysine histidine transporter 1-like	C:GO:0016020	C:membrane	0	0	IPR013057 (PFAM) | PTHR22950 (PANTHER) | PTHR22950:SF356 (PANTHER) | TMhelix (TMHMM) | TMhelix (TMHMM) | TMhelix (TMHMM) | TMhelix (TMHMM) | TMhelix (TMHMM) | TMhelix (TMHMM) | TMhelix (TMHMM) | TMhelix (TMHMM) | TMhelix (TMHMM) | TMhelix (TMHMM)	no GO terms	no GO terms
	VvCarFPS02VCR702_v1_PsGc_1006.ver1_0.g002350.m01	VvCarFPS02VCR702_v1_PsGc_1006.ver1_0.g002350	0	F-box plant	0	0	0	0	PTHR33784 (PANTHER)	no GO terms	no GO terms
	VvCarFPS02VCR702_v1_PsGc_1006.ver1_0.g002360.m01	VvCarFPS02VCR702_v1_PsGc_1006.ver1_0.g002360	0	3-oxoacyl-[acyl-carrier- ] reductase 4-like	P:GO:0019538 | P:GO:0006629 | C:GO:0005829 | P:GO:0009058 | P:GO:0044763 | F:GO:0016740 | P:GO:0044711 | P:GO:0009987	P:protein metabolic process | P:lipid metabolic process | C:cytosol | P:biosynthetic process | P:single-organism cellular process | F:transferase activity | P:single-organism biosynthetic process | P:cellular process	EC:2.3.1.85 | EC:1.1.1.100	Fatty-acid synthase | 3-oxoacyl-[acyl-carrier-protein] reductase	IPR002347 (PRINTS) | IPR002347 (PRINTS) | SM00822 (SMART) | IPR002347 (PFAM) | G3DSA:3.40.50.720 (GENE3D) | PTHR42760:SF16 (PANTHER) | PTHR42760 (PANTHER) | IPR036291 (SUPERFAMILY)	no GO terms	no GO terms
	VvCarFPS02VCR702_v1_PsGc_1006.ver1_0.g002370.m01	VvCarFPS02VCR702_v1_PsGc_1006.ver1_0.g002370	0	3-oxoacyl-[acyl-carrier- ] reductase 4-like	0	0	0	0	PF13561 (PFAM) | G3DSA:3.40.50.720 (GENE3D) | PTHR42760 (PANTHER) | PTHR42760:SF56 (PANTHER) | IPR036291 (SUPERFAMILY)	no GO terms	no GO terms
	VvCarFPS02VCR702_v1_PsGc_1006.ver1_0.g002380.m01	VvCarFPS02VCR702_v1_PsGc_1006.ver1_0.g002380	0	TLC domain-containing At5g14285-like	C:GO:0016020	C:membrane	0	0	IPR006634 (SMART) | IPR006634 (PFAM) | PTHR31766 (PANTHER) | IPR006634 (PROSITE_PROFILES)	C:GO:0016021	C:integral component of membrane
	VvCarFPS02VCR702_v1_PsGc_1006.ver1_0.g002390.m01	VvCarFPS02VCR702_v1_PsGc_1006.ver1_0.g002390	0	DNA polymerase alpha subunit B	F:GO:0003677 | P:GO:0009058 | F:GO:0016740 | P:GO:0006259 | C:GO:0005622	F:DNA binding | P:biosynthetic process | F:transferase activity | P:DNA metabolic process | C:intracellular	EC:2.7.7.7	DNA-directed DNA polymerase	IPR007185 (PFAM) | G3DSA:3.60.21.60 (GENE3D) | IPR016722 (PANTHER)	F:GO:0003677 | F:GO:0003887 | P:GO:0006260	F:DNA binding	P:DNA replication
	VvCarFPS02VCR702_v1_PsGc_1006.ver1_0.g002400.m01	VvCarFPS02VCR702_v1_PsGc_1006.ver1_0.g002400	0	DNA polymerase alpha subunit B	C:GO:0005634 | F:GO:0003677 | P:GO:0009058 | F:GO:0016740 | P:GO:0006259	C:nucleus | F:DNA binding | P:biosynthetic process | F:transferase activity | P:DNA metabolic process	EC:2.7.7.7	DNA-directed DNA polymerase	Coil (COILS) | IPR013627 (PFAM) | G3DSA:3.60.21.60 (GENE3D) | IPR007185 (PFAM) | IPR016722 (PIRSF) | mobidb-lite (MOBIDB_LITE) | IPR016722 (PANTHER)	F:GO:0003677 | F:GO:0003887 | P:GO:0006260	F:DNA binding	P:DNA replication
	VvCarFPS02VCR702_v1_PsGc_1006.ver1_0.g002410.m01	VvCarFPS02VCR702_v1_PsGc_1006.ver1_0.g002410	0	transmembrane amino acid transporter family	C:GO:0016020	C:membrane	0	0	IPR013057 (PFAM) | PTHR22950:SF356 (PANTHER) | PTHR22950 (PANTHER) | TMhelix (TMHMM) | TMhelix (TMHMM) | TMhelix (TMHMM) | TMhelix (TMHMM) | TMhelix (TMHMM) | TMhelix (TMHMM) | TMhelix (TMHMM) | TMhelix (TMHMM) | TMhelix (TMHMM) | TMhelix (TMHMM) | TMhelix (TMHMM) | TMhelix (TMHMM)	no GO terms	no GO terms
	VvCarFPS02VCR702_v1_PsGc_1006.ver1_0.g002420.m01	VvCarFPS02VCR702_v1_PsGc_1006.ver1_0.g002420	0	mitochondrial chaperone bcs1	0	0	0	0	PTHR23070 (PANTHER) | PTHR23070:SF49 (PANTHER)	no GO terms	no GO terms
	VvCarFPS02VCR702_v1_PsGc_1006.ver1_0.g002430.m01	VvCarFPS02VCR702_v1_PsGc_1006.ver1_0.g002430	0	mitochondrial chaperone bcs1	0	0	0	0	IPR025753 (PFAM) | PTHR23070 (PANTHER) | PTHR23070:SF49 (PANTHER)	no GO terms	no GO terms
	VvCarFPS02VCR702_v1_PsGc_1006.ver1_0.g002440.m01	VvCarFPS02VCR702_v1_PsGc_1006.ver1_0.g002440	0	mitochondrial chaperone bcs1	F:GO:0000166	F:nucleotide binding	0	0	mobidb-lite (MOBIDB_LITE) | PTHR23070:SF49 (PANTHER) | PTHR23070 (PANTHER)	no GO terms	no GO terms
	VvCarFPS02VCR702_v1_PsGc_1006.ver1_0.g002450.m01	VvCarFPS02VCR702_v1_PsGc_1006.ver1_0.g002450	0	mitochondrial chaperone bcs1	F:GO:0000166	F:nucleotide binding	0	0	G3DSA:3.40.50.300 (GENE3D) | IPR003959 (PFAM) | IPR025753 (PFAM) | PTHR23070 (PANTHER) | PTHR23070:SF49 (PANTHER) | cd00009 (CDD) | SignalP-TM (SIGNALP_GRAM_POSITIVE) | IPR027417 (SUPERFAMILY)	F:GO:0005524	F:ATP binding
	VvCarFPS02VCR702_v1_PsGc_1006.ver1_0.g002460.m01	VvCarFPS02VCR702_v1_PsGc_1006.ver1_0.g002460	0	4-coumarate-- ligase-like 5 isoform X1	F:GO:0003824 | P:GO:0008152	F:catalytic activity | P:metabolic process	0	0	G3DSA:3.30.300.30 (GENE3D) | G3DSA:3.40.50.12780 (GENE3D) | IPR025110 (PFAM) | IPR000873 (PFAM) | PTHR24096 (PANTHER) | PTHR24096:SF255 (PANTHER) | PTHR24096 (PANTHER) | PTHR24096:SF255 (PANTHER) | IPR020845 (PROSITE_PATTERNS) | SSF56801 (SUPERFAMILY)	F:GO:0003824 | P:GO:0008152	F:catalytic activity
	VvCarFPS02VCR702_v1_PsGc_1006.ver1_0.g002470.m01	VvCarFPS02VCR702_v1_PsGc_1006.ver1_0.g002470	0	lipoxygenase chloroplastic	F:GO:0003824 | P:GO:0008152 | F:GO:0005488 | P:GO:0044710	F:catalytic activity | P:metabolic process | F:binding | P:single-organism metabolic process	EC:1.13.11	Acting on single donors with incorporation of molecular oxygen (oxygenases). The oxygen incorporated need not be derived from O(2)	IPR013819 (PFAM) | G3DSA:1.20.245.10 (GENE3D) | IPR000907 (PANTHER) | PTHR11771:SF60 (PANTHER) | IPR013819 (PROSITE_PROFILES) | IPR036226 (SUPERFAMILY)	F:GO:0016702 | F:GO:0046872 | P:GO:0055114	F:oxidoreductase activity, acting on single donors with incorporation of molecular oxygen, incorporation of two atoms of oxygen	P:oxidation-reduction process
	VvCarFPS02VCR702_v1_PsGc_1006.ver1_0.g002480.m01	VvCarFPS02VCR702_v1_PsGc_1006.ver1_0.g002480	0	lipoxygenase chloroplastic	F:GO:0003824 | P:GO:0008152 | F:GO:0005488 | P:GO:0044710	F:catalytic activity | P:metabolic process | F:binding | P:single-organism metabolic process	EC:1.13.11	Acting on single donors with incorporation of molecular oxygen (oxygenases). The oxygen incorporated need not be derived from O(2)	IPR001246 (PRINTS) | IPR027433 (G3DSA:4.10.372.GENE3D) | IPR013819 (PFAM) | G3DSA:3.10.450.60 (GENE3D) | IPR000907 (PANTHER) | PTHR11771:SF60 (PANTHER) | IPR013819 (PROSITE_PROFILES) | IPR036226 (SUPERFAMILY)	F:GO:0016702 | F:GO:0016491 | F:GO:0046872 | P:GO:0055114	F:oxidoreductase activity, acting on single donors with incorporation of molecular oxygen, incorporation of two atoms of oxygen	F:metal ion binding	P:oxidation-reduction process
	VvCarFPS02VCR702_v1_PsGc_1006.ver1_0.g002490.m01	VvCarFPS02VCR702_v1_PsGc_1006.ver1_0.g002490	0	lipoxygenase chloroplastic	F:GO:0005515 | F:GO:0003824 | P:GO:0008152 | P:GO:0044710	F:protein binding | F:catalytic activity | P:metabolic process | P:single-organism metabolic process	EC:1.13.11	Acting on single donors with incorporation of molecular oxygen (oxygenases). The oxygen incorporated need not be derived from O(2)	G3DSA:2.60.60.20 (GENE3D) | mobidb-lite (MOBIDB_LITE) | IPR000907 (PANTHER) | PTHR11771:SF60 (PANTHER) | IPR036392 (SUPERFAMILY)	F:GO:0016702 | F:GO:0005515 | F:GO:0046872 | P:GO:0055114	F:oxidoreductase activity, acting on single donors with incorporation of molecular oxygen, incorporation of two atoms of oxygen	F:metal ion binding	P:oxidation-reduction process
	VvCarFPS02VCR702_v1_PsGc_1006.ver1_0.g002500.m01	VvCarFPS02VCR702_v1_PsGc_1006.ver1_0.g002500	0	urease	P:GO:0009056 | F:GO:0005488 | P:GO:0006139 | F:GO:0016787	P:catabolic process | F:binding | P:nucleobase-containing compound metabolic process | F:hydrolase activity	EC:3.5.1.5	Urease	IPR005848 (PRINTS) | IPR011059 (G3DSA:2.30.40.GENE3D) | IPR006680 (PFAM) | IPR036461 (G3DSA:2.10.150.GENE3D) | G3DSA:3.20.20.140 (GENE3D) | IPR011612 (PFAM) | IPR011059 (G3DSA:2.30.40.GENE3D) | IPR005848 (TIGRFAM) | IPR005848 (PANTHER) | IPR017950 (PROSITE_PATTERNS) | IPR017951 (PROSITE_PROFILES) | IPR005848 (HAMAP) | IPR005848 (CDD) | IPR032466 (SUPERFAMILY) | IPR036461 (SUPERFAMILY) | IPR011059…	F:GO:0016810 | P:GO:0006807 | F:GO:0016151 | F:GO:0009039 | F:GO:0016787	F:hydrolase activity, acting on carbon-nitrogen (but not peptide) bonds	F:nickel cation binding	F:urease activity	F:hydrolase activity
	VvCarFPS02VCR702_v1_PsGc_1006.ver1_0.g002510.m01	VvCarFPS02VCR702_v1_PsGc_1006.ver1_0.g002510	0	adenylate kinase	F:GO:0000166 | F:GO:0016301 | P:GO:0006139	F:nucleotide binding | F:kinase activity | P:nucleobase-containing compound metabolic process	EC:2.7.4.3	Adenylate kinase	IPR000850 (PRINTS) | PF00406 (PFAM) | G3DSA:3.40.50.300 (GENE3D) | PTHR23359:SF22 (PANTHER) | IPR000850 (PANTHER) | IPR033690 (PROSITE_PATTERNS) | IPR000850 (HAMAP) | IPR000850 (CDD) | IPR027417 (SUPERFAMILY)	F:GO:0005524 | F:GO:0019205 | P:GO:0006139	F:ATP binding	P:nucleobase-containing compound metabolic process
	VvCarFPS02VCR702_v1_PsGc_1006.ver1_0.g002520.m01	VvCarFPS02VCR702_v1_PsGc_1006.ver1_0.g002520	0	probable pre-mRNA-splicing factor ATP-dependent RNA helicase DEAH4	F:GO:0003676 | F:GO:0000166 | F:GO:0016787	F:nucleic acid binding | F:nucleotide binding | F:hydrolase activity	EC:3.6.1.15	Nucleoside-triphosphate phosphatase	Coil (COILS) | IPR001650 (SMART) | IPR014001 (SMART) | IPR007502 (SMART) | IPR007502 (PFAM) | G3DSA:1.20.120.1080 (GENE3D) | IPR011545 (PFAM) | IPR011709 (PFAM) | IPR001650 (PFAM) | G3DSA:3.40.50.300 (GENE3D) | G3DSA:3.40.50.300 (GENE3D) | mobidb-lite (MOBIDB_LITE) | mobidb-lite (MOBIDB_LITE) | PTHR18934:SF131 (PANTHER) | PTHR18934 (PANTHER) | IPR002464 (PROSITE_PATTERNS) | IPR001650 (PROSITE_PRO…	F:GO:0003676 | F:GO:0005524 | F:GO:0004386	F:nucleic acid binding	F:helicase activity
	VvCarFPS02VCR702_v1_PsGc_1006.ver1_0.g002530.m01	VvCarFPS02VCR702_v1_PsGc_1006.ver1_0.g002530	0	ankyrin domain	F:GO:0005515	F:protein binding	0	0	IPR002110 (SMART) | IPR020683 (PFAM) | IPR036770 (G3DSA:1.25.40.GENE3D) | IPR036770 (G3DSA:1.25.40.GENE3D) | IPR036770 (G3DSA:1.25.40.GENE3D) | PTHR24158 (PANTHER) | PTHR24158:SF35 (PANTHER) | IPR002110 (PROSITE_PROFILES) | IPR002110 (PROSITE_PROFILES) | IPR002110 (PROSITE_PROFILES) | IPR002110 (PROSITE_PROFILES) | IPR002110 (PROSITE_PROFILES) | IPR020683 (PROSITE_PROFILES) | IPR002110 (PROSITE_P…	F:GO:0005515	F:protein binding
	VvCarFPS02VCR702_v1_PsGc_1006.ver1_0.g002540.m01	VvCarFPS02VCR702_v1_PsGc_1006.ver1_0.g002540	0	early endosome antigen 1-like	C:GO:0005635	C:nuclear envelope	0	0	Coil (COILS) | IPR019448 (PFAM) | mobidb-lite (MOBIDB_LITE) | mobidb-lite (MOBIDB_LITE) | mobidb-lite (MOBIDB_LITE) | mobidb-lite (MOBIDB_LITE) | mobidb-lite (MOBIDB_LITE) | mobidb-lite (MOBIDB_LITE) | PTHR31344:SF5 (PANTHER) | PTHR31344 (PANTHER)	no GO terms	no GO terms
	VvCarFPS02VCR702_v1_PsGc_1006.ver1_0.g002550.m01	VvCarFPS02VCR702_v1_PsGc_1006.ver1_0.g002550	0	OTU domain-containing At3g57810-like	C:GO:0009536	C:plastid	0	0	IPR003323 (PFAM) | G3DSA:3.90.70.80 (GENE3D) | PTHR12419 (PANTHER) | PTHR12419:SF26 (PANTHER) | IPR003323 (PROSITE_PROFILES) | SSF54001 (SUPERFAMILY)	no GO terms	no GO terms
	VvCarFPS02VCR702_v1_PsGc_1006.ver1_0.g002560.m01	VvCarFPS02VCR702_v1_PsGc_1006.ver1_0.g002560	0	bZIP transcription factor family	0	0	0	0	mobidb-lite (MOBIDB_LITE) | mobidb-lite (MOBIDB_LITE) | PTHR37710 (PANTHER)	no GO terms	no GO terms
	VvCarFPS02VCR702_v1_PsGc_1006.ver1_0.g002570.m01	VvCarFPS02VCR702_v1_PsGc_1006.ver1_0.g002570	0	mitochondrial chaperone bcs1	0	0	0	0	PTHR23070:SF49 (PANTHER) | PTHR23070 (PANTHER)	no GO terms	no GO terms
	VvCarFPS02VCR702_v1_PsGc_1006.ver1_0.g002580.m01	VvCarFPS02VCR702_v1_PsGc_1006.ver1_0.g002580	0	mitochondrial chaperone bcs1	F:GO:0000166	F:nucleotide binding	0	0	IPR003593 (SMART) | IPR003959 (PFAM) | G3DSA:3.40.50.300 (GENE3D) | IPR025753 (PFAM) | PTHR23070:SF49 (PANTHER) | PTHR23070 (PANTHER) | IPR003960 (PROSITE_PATTERNS) | cd00009 (CDD) | IPR027417 (SUPERFAMILY)	F:GO:0005524	F:ATP binding
	VvCarFPS02VCR702_v1_PsGc_1006.ver1_0.g002590.m01	VvCarFPS02VCR702_v1_PsGc_1006.ver1_0.g002590	0	mitochondrial chaperone bcs1	0	0	0	0	PTHR23070:SF49 (PANTHER) | PTHR23070 (PANTHER)	no GO terms	no GO terms
	VvCarFPS02VCR702_v1_PsGc_1006.ver1_0.g002600.m01	VvCarFPS02VCR702_v1_PsGc_1006.ver1_0.g002600	0	mitochondrial chaperone bcs1	F:GO:0000166	F:nucleotide binding	0	0	IPR003593 (SMART) | G3DSA:3.40.50.300 (GENE3D) | IPR025753 (PFAM) | IPR003959 (PFAM) | mobidb-lite (MOBIDB_LITE) | PTHR23070 (PANTHER) | PTHR23070:SF49 (PANTHER) | IPR003960 (PROSITE_PATTERNS) | cd00009 (CDD) | IPR027417 (SUPERFAMILY)	F:GO:0005524	F:ATP binding
	VvCarFPS02VCR702_v1_PsGc_1006.ver1_0.g002610.m01	VvCarFPS02VCR702_v1_PsGc_1006.ver1_0.g002610	0	mitochondrial chaperone bcs1	F:GO:0000166	F:nucleotide binding	0	0	IPR003593 (SMART) | G3DSA:3.40.50.300 (GENE3D) | IPR003959 (PFAM) | IPR025753 (PFAM) | mobidb-lite (MOBIDB_LITE) | PTHR23070 (PANTHER) | PTHR23070:SF49 (PANTHER) | IPR003960 (PROSITE_PATTERNS) | cd00009 (CDD) | IPR027417 (SUPERFAMILY)	F:GO:0005524	F:ATP binding
	VvCarFPS02VCR702_v1_PsGc_1006.ver1_0.g002620.m01	VvCarFPS02VCR702_v1_PsGc_1006.ver1_0.g002620	0	mitochondrial chaperone bcs1	F:GO:0000166	F:nucleotide binding	0	0	IPR003593 (SMART) | IPR003959 (PFAM) | IPR025753 (PFAM) | G3DSA:3.40.50.300 (GENE3D) | PTHR23070:SF49 (PANTHER) | PTHR23070 (PANTHER) | IPR003960 (PROSITE_PATTERNS) | cd00009 (CDD) | SignalP-TM (SIGNALP_GRAM_POSITIVE) | IPR027417 (SUPERFAMILY)	F:GO:0005524	F:ATP binding
	VvCarFPS02VCR702_v1_PsGc_1006.ver1_0.g002630.m01	VvCarFPS02VCR702_v1_PsGc_1006.ver1_0.g002630	0	ARM repeat superfamily	F:GO:0005515 | P:GO:0006464 | F:GO:0016740	F:protein binding | P:cellular protein modification process | F:transferase activity	0	0	IPR000225 (SMART) | IPR003613 (SMART) | IPR003613 (PFAM) | IPR011989 (G3DSA:1.25.10.GENE3D) | PF05804 (PFAM) | IPR013083 (G3DSA:3.30.40.GENE3D) | mobidb-lite (MOBIDB_LITE) | PTHR22849:SF8 (PANTHER) | PTHR22849 (PANTHER) | IPR003613 (PROSITE_PROFILES) | cd16664 (CDD) | SSF57850 (SUPERFAMILY) | IPR016024 (SUPERFAMILY)	F:GO:0004842 | F:GO:0005515 | F:GO:0005488 | P:GO:0016567	F:ubiquitin-protein transferase activity	F:binding	P:protein ubiquitination
	VvCarFPS02VCR702_v1_PsGc_1006.ver1_0.g002640.m01	VvCarFPS02VCR702_v1_PsGc_1006.ver1_0.g002640	0	N-terminal nucleophile aminohydrolases (Ntn hydrolases) superfamily	P:GO:0019538 | C:GO:0005737 | P:GO:0009056 | P:GO:0009987 | F:GO:0016787	P:protein metabolic process | C:cytoplasm | P:catabolic process | P:cellular process | F:hydrolase activity	EC:3.4.25	Acting on peptide bonds (peptidases)	IPR000243 (PRINTS) | IPR029055 (G3DSA:3.60.20.GENE3D) | IPR001353 (PFAM) | PTHR11599 (PANTHER) | PTHR11599:SF63 (PANTHER) | IPR016050 (PROSITE_PATTERNS) | IPR023333 (PROSITE_PROFILES) | cd03761 (CDD) | IPR029055 (SUPERFAMILY)	C:GO:0005839 | F:GO:0004175 | F:GO:0004298 | P:GO:0051603	C:proteasome core complex	F:threonine-type endopeptidase activity	P:proteolysis involved in cellular protein catabolic process
	VvCarFPS02VCR702_v1_PsGc_1006.ver1_0.g002650.m01	VvCarFPS02VCR702_v1_PsGc_1006.ver1_0.g002650	0	receptor kinase ZAR1	F:GO:0000166 | F:GO:0005515 | C:GO:0016020 | P:GO:0006464 | F:GO:0016301	F:nucleotide binding | F:protein binding | C:membrane | P:cellular protein modification process | F:kinase activity	0	0	IPR000719 (SMART) | G3DSA:3.30.200.20 (GENE3D) | IPR032675 (G3DSA:3.80.10.GENE3D) | G3DSA:1.10.510.10 (GENE3D) | IPR001611 (PFAM) | IPR000719 (PFAM) | IPR032675 (G3DSA:3.80.10.GENE3D) | IPR013210 (PFAM) | mobidb-lite (MOBIDB_LITE) | PTHR27008 (PANTHER) | PTHR27008:SF9 (PANTHER) | IPR008271 (PROSITE_PATTERNS) | IPR000719 (PROSITE_PROFILES) | cd14066 (CDD) | SignalP-noTM (SIGNALP_GRAM_NEGATIVE) | S…	F:GO:0005524 | F:GO:0005515 | F:GO:0004672 | P:GO:0006468	F:ATP binding	F:protein kinase activity	P:protein phosphorylation
	VvCarFPS02VCR702_v1_PsGc_1006.ver1_0.g002660.m01	VvCarFPS02VCR702_v1_PsGc_1006.ver1_0.g002660	0	probable pre-mRNA-splicing factor ATP-dependent RNA helicase DEAH5	F:GO:0003676 | F:GO:0000166 | C:GO:0005737 | F:GO:0016787	F:nucleic acid binding | F:nucleotide binding | C:cytoplasm | F:hydrolase activity	EC:3.6.1.15	Nucleoside-triphosphate phosphatase	Coil (COILS) | IPR001650 (SMART) | IPR014001 (SMART) | IPR007502 (SMART) | IPR007502 (PFAM) | IPR011545 (PFAM) | G3DSA:1.20.120.1080 (GENE3D) | G3DSA:3.40.50.300 (GENE3D) | IPR011709 (PFAM) | IPR001650 (PFAM) | G3DSA:3.40.50.300 (GENE3D) | mobidb-lite (MOBIDB_LITE) | mobidb-lite (MOBIDB_LITE) | mobidb-lite (MOBIDB_LITE) | PTHR18934:SF91 (PANTHER) | PTHR18934 (PANTHER) | IPR014001 (PROSITE_PROFILE…	F:GO:0003676 | F:GO:0005524 | F:GO:0004386	F:nucleic acid binding	F:helicase activity
	VvCarFPS02VCR702_v1_PsGc_1006.ver1_0.g002670.m01	VvCarFPS02VCR702_v1_PsGc_1006.ver1_0.g002670	0	calcium-binding CML19	F:GO:0005488	F:binding	0	0	Coil (COILS) | IPR002048 (SMART) | G3DSA:1.10.238.10 (GENE3D) | G3DSA:1.10.238.10 (GENE3D) | IPR002048 (PFAM) | IPR002048 (PFAM) | PTHR43996 (PANTHER) | PTHR43996:SF5 (PANTHER) | IPR018247 (PROSITE_PATTERNS) | IPR018247 (PROSITE_PATTERNS) | IPR018247 (PROSITE_PATTERNS) | IPR002048 (PROSITE_PROFILES) | IPR002048 (PROSITE_PROFILES) | IPR002048 (PROSITE_PROFILES) | IPR002048 (PROSITE_PROFILES) | IPR…	F:GO:0005509	F:calcium ion binding
	VvCarFPS02VCR702_v1_PsGc_1006.ver1_0.g002680.m01	VvCarFPS02VCR702_v1_PsGc_1006.ver1_0.g002680	0	calcium-binding CML19	F:GO:0005488	F:binding	0	0	Coil (COILS) | IPR002048 (SMART) | IPR002048 (PFAM) | IPR002048 (PFAM) | G3DSA:1.10.238.10 (GENE3D) | G3DSA:1.10.238.10 (GENE3D) | PTHR43996:SF5 (PANTHER) | PTHR43996 (PANTHER) | IPR018247 (PROSITE_PATTERNS) | IPR018247 (PROSITE_PATTERNS) | IPR018247 (PROSITE_PATTERNS) | IPR002048 (PROSITE_PROFILES) | IPR002048 (PROSITE_PROFILES) | IPR002048 (PROSITE_PROFILES) | IPR002048 (PROSITE_PROFILES) | IPR…	F:GO:0005509	F:calcium ion binding
	VvCarFPS02VCR702_v1_PsGc_1006.ver1_0.g002690.m01	VvCarFPS02VCR702_v1_PsGc_1006.ver1_0.g002690	0	calcium-binding CML19	F:GO:0005488	F:binding	0	0	Coil (COILS) | IPR002048 (SMART) | IPR002048 (PFAM) | G3DSA:1.10.238.10 (GENE3D) | G3DSA:1.10.238.10 (GENE3D) | IPR002048 (PFAM) | PTHR43996:SF5 (PANTHER) | PTHR43996 (PANTHER) | IPR018247 (PROSITE_PATTERNS) | IPR018247 (PROSITE_PATTERNS) | IPR018247 (PROSITE_PATTERNS) | IPR002048 (PROSITE_PROFILES) | IPR002048 (PROSITE_PROFILES) | IPR002048 (PROSITE_PROFILES) | IPR002048 (PROSITE_PROFILES) | IPR…	F:GO:0005509	F:calcium ion binding
	VvCarFPS02VCR702_v1_PsGc_1006.ver1_0.g002700.m01	VvCarFPS02VCR702_v1_PsGc_1006.ver1_0.g002700	0	calcium-binding CML19	F:GO:0005488	F:binding	0	0	Coil (COILS) | IPR002048 (SMART) | IPR002048 (PFAM) | IPR002048 (PFAM) | G3DSA:1.10.238.10 (GENE3D) | G3DSA:1.10.238.10 (GENE3D) | PTHR43996:SF5 (PANTHER) | PTHR43996 (PANTHER) | IPR018247 (PROSITE_PATTERNS) | IPR018247 (PROSITE_PATTERNS) | IPR018247 (PROSITE_PATTERNS) | IPR002048 (PROSITE_PROFILES) | IPR002048 (PROSITE_PROFILES) | IPR002048 (PROSITE_PROFILES) | IPR002048 (PROSITE_PROFILES) | IPR…	F:GO:0005509	F:calcium ion binding
	VvCarFPS02VCR702_v1_PsGc_1006.ver1_0.g002710.m01	VvCarFPS02VCR702_v1_PsGc_1006.ver1_0.g002710	0	calcium-binding CML19	F:GO:0005488	F:binding	0	0	Coil (COILS) | IPR002048 (SMART) | G3DSA:1.10.238.10 (GENE3D) | IPR002048 (PFAM) | G3DSA:1.10.238.10 (GENE3D) | IPR002048 (PFAM) | PTHR43996:SF5 (PANTHER) | PTHR43996 (PANTHER) | IPR018247 (PROSITE_PATTERNS) | IPR018247 (PROSITE_PATTERNS) | IPR018247 (PROSITE_PATTERNS) | IPR002048 (PROSITE_PROFILES) | IPR002048 (PROSITE_PROFILES) | IPR002048 (PROSITE_PROFILES) | IPR002048 (PROSITE_PROFILES) | IPR…	F:GO:0005509	F:calcium ion binding
	VvCarFPS02VCR702_v1_PsGc_1006.ver1_0.g002720.m01	VvCarFPS02VCR702_v1_PsGc_1006.ver1_0.g002720	0	calcium-binding CML19	F:GO:0005488	F:binding	0	0	Coil (COILS) | IPR002048 (SMART) | IPR002048 (PFAM) | G3DSA:1.10.238.10 (GENE3D) | IPR002048 (PFAM) | G3DSA:1.10.238.10 (GENE3D) | PTHR43996:SF5 (PANTHER) | PTHR43996 (PANTHER) | IPR018247 (PROSITE_PATTERNS) | IPR018247 (PROSITE_PATTERNS) | IPR018247 (PROSITE_PATTERNS) | IPR002048 (PROSITE_PROFILES) | IPR002048 (PROSITE_PROFILES) | IPR002048 (PROSITE_PROFILES) | IPR002048 (PROSITE_PROFILES) | IPR…	F:GO:0005509	F:calcium ion binding
	VvCarFPS02VCR702_v1_PsGc_1006.ver1_0.g002730.m01	VvCarFPS02VCR702_v1_PsGc_1006.ver1_0.g002730	0	calcium-binding CML19	F:GO:0005488	F:binding	0	0	Coil (COILS) | IPR002048 (SMART) | IPR002048 (PFAM) | IPR002048 (PFAM) | G3DSA:1.10.238.10 (GENE3D) | G3DSA:1.10.238.10 (GENE3D) | PTHR43996 (PANTHER) | PTHR43996:SF5 (PANTHER) | IPR018247 (PROSITE_PATTERNS) | IPR018247 (PROSITE_PATTERNS) | IPR018247 (PROSITE_PATTERNS) | IPR002048 (PROSITE_PROFILES) | IPR002048 (PROSITE_PROFILES) | IPR002048 (PROSITE_PROFILES) | IPR002048 (PROSITE_PROFILES) | IPR…	F:GO:0005509	F:calcium ion binding
	VvCarFPS02VCR702_v1_PsGc_1006.ver1_0.g002740.m01	VvCarFPS02VCR702_v1_PsGc_1006.ver1_0.g002740	0	calcium-binding CML19	F:GO:0005488	F:binding	0	0	Coil (COILS) | IPR002048 (SMART) | IPR002048 (PFAM) | IPR002048 (PFAM) | G3DSA:1.10.238.10 (GENE3D) | G3DSA:1.10.238.10 (GENE3D) | PTHR43996:SF5 (PANTHER) | PTHR43996 (PANTHER) | IPR018247 (PROSITE_PATTERNS) | IPR018247 (PROSITE_PATTERNS) | IPR002048 (PROSITE_PROFILES) | IPR002048 (PROSITE_PROFILES) | IPR002048 (PROSITE_PROFILES) | IPR002048 (PROSITE_PROFILES) | IPR002048 (CDD) | IPR002048 (CDD) …	F:GO:0005509	F:calcium ion binding
	VvCarFPS02VCR702_v1_PsGc_1006.ver1_0.g002750.m01	VvCarFPS02VCR702_v1_PsGc_1006.ver1_0.g002750	0	calcium-binding CML19	F:GO:0005488	F:binding	0	0	Coil (COILS) | IPR002048 (SMART) | IPR002048 (PFAM) | G3DSA:1.10.238.10 (GENE3D) | IPR002048 (PFAM) | PTHR43996:SF5 (PANTHER) | PTHR43996 (PANTHER) | IPR018247 (PROSITE_PATTERNS) | IPR018247 (PROSITE_PATTERNS) | IPR018247 (PROSITE_PATTERNS) | IPR002048 (PROSITE_PROFILES) | IPR002048 (PROSITE_PROFILES) | IPR002048 (PROSITE_PROFILES) | IPR002048 (PROSITE_PROFILES) | IPR002048 (CDD) | IPR002048 (CDD…	F:GO:0005509	F:calcium ion binding
	VvCarFPS02VCR702_v1_PsGc_1006.ver1_0.g002760.m01	VvCarFPS02VCR702_v1_PsGc_1006.ver1_0.g002760	0	calcium-binding CML19	F:GO:0005488	F:binding	0	0	Coil (COILS) | IPR002048 (SMART) | IPR002048 (PFAM) | G3DSA:1.10.238.10 (GENE3D) | G3DSA:1.10.238.10 (GENE3D) | IPR002048 (PFAM) | PTHR43996 (PANTHER) | PTHR43996:SF5 (PANTHER) | IPR018247 (PROSITE_PATTERNS) | IPR018247 (PROSITE_PATTERNS) | IPR018247 (PROSITE_PATTERNS) | IPR002048 (PROSITE_PROFILES) | IPR002048 (PROSITE_PROFILES) | IPR002048 (PROSITE_PROFILES) | IPR002048 (PROSITE_PROFILES) | IPR…	F:GO:0005509	F:calcium ion binding
	VvCarFPS02VCR702_v1_PsGc_1006.ver1_0.g002770.m01	VvCarFPS02VCR702_v1_PsGc_1006.ver1_0.g002770	0	ankyrin repeat	0	0	0	0	mobidb-lite (MOBIDB_LITE) | TMhelix (TMHMM)	no GO terms	no GO terms
	VvCarFPS02VCR702_v1_PsGc_1006.ver1_0.g002780.m01	VvCarFPS02VCR702_v1_PsGc_1006.ver1_0.g002780	0	hypothetical protein POPTR_0001s33990g	0	0	0	0	mobidb-lite (MOBIDB_LITE) | mobidb-lite (MOBIDB_LITE) | mobidb-lite (MOBIDB_LITE) | PTHR34280:SF2 (PANTHER) | PTHR34280 (PANTHER)	no GO terms	no GO terms
	VvCarFPS02VCR702_v1_PsGc_1006.ver1_0.g002790.m01	VvCarFPS02VCR702_v1_PsGc_1006.ver1_0.g002790	0	LRR receptor-like serine threonine- kinase GSO1	F:GO:0005515 | C:GO:0016020	F:protein binding | C:membrane	0	0	PR00019 (PRINTS) | IPR032675 (G3DSA:3.80.10.GENE3D) | IPR001611 (PFAM) | PTHR27004:SF21 (PANTHER) | PTHR27004 (PANTHER) | SSF52058 (SUPERFAMILY) | TMhelix (TMHMM)	F:GO:0005515	F:protein binding
	VvCarFPS02VCR702_v1_PsGc_1006.ver1_0.g002800.m01	VvCarFPS02VCR702_v1_PsGc_1006.ver1_0.g002800	0	LRR receptor-like kinase family	F:GO:0005515	F:protein binding	0	0	SM00368 (SMART) | IPR003591 (SMART) | IPR013210 (PFAM) | IPR001611 (PFAM) | IPR032675 (G3DSA:3.80.10.GENE3D) | IPR032675 (G3DSA:3.80.10.GENE3D) | IPR032675 (G3DSA:3.80.10.GENE3D) | IPR032675 (G3DSA:3.80.10.GENE3D) | PTHR27004 (PANTHER) | PTHR27004:SF41 (PANTHER) | IPR001611 (PROSITE_PROFILES) | IPR001611 (PROSITE_PROFILES) | IPR001611 (PROSITE_PROFILES) | IPR001611 (PROSITE_PROFILES) | IPR001611 …	F:GO:0005515	F:protein binding
	VvCarFPS02VCR702_v1_PsGc_1006.ver1_0.g002810.m01	VvCarFPS02VCR702_v1_PsGc_1006.ver1_0.g002810	0	LRR receptor-like serine threonine- kinase GSO1	F:GO:0005515 | C:GO:0016020	F:protein binding | C:membrane	0	0	IPR001611 (PFAM) | IPR032675 (G3DSA:3.80.10.GENE3D) | mobidb-lite (MOBIDB_LITE) | PTHR27004:SF21 (PANTHER) | PTHR27004 (PANTHER) | SSF52058 (SUPERFAMILY) | TMhelix (TMHMM)	F:GO:0005515	F:protein binding
	VvCarFPS02VCR702_v1_PsGc_1006.ver1_0.g002820.m01	VvCarFPS02VCR702_v1_PsGc_1006.ver1_0.g002820	0	GEM 7	F:GO:0016740	F:transferase activity	0	0	IPR004182 (SMART) | IPR004182 (PFAM) | IPR011993 (G3DSA:2.30.29.GENE3D) | PTHR31969:SF32 (PANTHER) | IPR037848 (PANTHER)	no GO terms	no GO terms
	VvCarFPS02VCR702_v1_PsGc_1006.ver1_0.g002830.m01	VvCarFPS02VCR702_v1_PsGc_1006.ver1_0.g002830	0	zinc finger CCCH domain-containing 17-like	F:GO:0005515	F:protein binding	0	0	IPR001680 (SMART) | IPR000571 (SMART) | G3DSA:4.10.1000.10 (GENE3D) | IPR001680 (PFAM) | IPR015943 (G3DSA:2.130.10.GENE3D) | IPR015943 (G3DSA:2.130.10.GENE3D) | mobidb-lite (MOBIDB_LITE) | PTHR44050 (PANTHER) | PTHR44050:SF4 (PANTHER) | PTHR44050 (PANTHER) | PTHR44050:SF4 (PANTHER) | IPR019775 (PROSITE_PATTERNS) | IPR000571 (PROSITE_PROFILES) | IPR000571 (PROSITE_PROFILES) | IPR001680 (PROSITE_PR…	F:GO:0005515 | F:GO:0046872	F:protein binding
	VvCarFPS02VCR702_v1_PsGc_1007.ver1_0.g002840.m01	VvCarFPS02VCR702_v1_PsGc_1007.ver1_0.g002840	0	hypothetical protein POPTR_0013s12970g	0	0	0	0	TMhelix (TMHMM)	no GO terms	no GO terms
	VvCarFPS02VCR702_v1_PsGc_1007.ver1_0.g002850.m01	VvCarFPS02VCR702_v1_PsGc_1007.ver1_0.g002850	0	hypothetical protein POPTR_0010s14570g	0	0	0	0	mobidb-lite (MOBIDB_LITE) | TMhelix (TMHMM) | TMhelix (TMHMM) | TMhelix (TMHMM) | TMhelix (TMHMM)	no GO terms	no GO terms
	VvCarFPS02VCR702_v1_PsGc_1007.ver1_0.g002860.m01	VvCarFPS02VCR702_v1_PsGc_1007.ver1_0.g002860	0	elongation factor 1-alpha-like	0	0	0	0	G3DSA:2.40.30.10 (GENE3D) | PTHR23115:SF227 (PANTHER) | PTHR23115 (PANTHER) | IPR009000 (SUPERFAMILY)	no GO terms	no GO terms
	VvCarFPS02VCR702_v1_PsGc_1007.ver1_0.g002870.m01	VvCarFPS02VCR702_v1_PsGc_1007.ver1_0.g002870	0	ENHANCER OF AG-4 2-like	0	0	0	0	no IPS match	no IPS match	no IPS match
	VvCarFPS02VCR702_v1_PsGc_1007.ver1_0.g002880.m01	VvCarFPS02VCR702_v1_PsGc_1007.ver1_0.g002880	0	TRAF-like superfamily	0	0	0	0	Coil (COILS)	no GO terms	no GO terms
	VvCarFPS02VCR702_v1_PsGc_1007.ver1_0.g002890.m01	VvCarFPS02VCR702_v1_PsGc_1007.ver1_0.g002890	0	hypothetical protein POPTR_0010s14570g	0	0	0	0	mobidb-lite (MOBIDB_LITE) | TMhelix (TMHMM) | TMhelix (TMHMM) | TMhelix (TMHMM)	no GO terms	no GO terms
	VvCarFPS02VCR702_v1_PsGc_1007.ver1_0.g002900.m01	VvCarFPS02VCR702_v1_PsGc_1007.ver1_0.g002900	0	hypothetical protein L484_025821	0	0	0	0	mobidb-lite (MOBIDB_LITE) | TMhelix (TMHMM) | TMhelix (TMHMM) | TMhelix (TMHMM) | TMhelix (TMHMM)	no GO terms	no GO terms
	VvCarFPS02VCR702_v1_PsGc_1007.ver1_0.g002910.m01	VvCarFPS02VCR702_v1_PsGc_1007.ver1_0.g002910	0	chloroplastic isoform X3	0	0	0	0	IPR029058 (G3DSA:3.40.50.GENE3D) | IPR000073 (PFAM) | PTHR10992 (PANTHER) | PTHR10992:SF984 (PANTHER) | IPR029058 (SUPERFAMILY)	no GO terms	no GO terms
	VvCarFPS02VCR702_v1_PsGc_1007.ver1_0.g002920.m01	VvCarFPS02VCR702_v1_PsGc_1007.ver1_0.g002920	0	chloroplastic isoform X3	P:GO:0009058 | P:GO:0044763 | F:GO:0005488 | F:GO:0016740 | P:GO:0044711 | P:GO:0009987	P:biosynthetic process | P:single-organism cellular process | F:binding | F:transferase activity | P:single-organism biosynthetic process | P:cellular process	EC:2.2.1.9	2-succinyl-5-enolpyruvyl-6-hydroxy-3-cyclohexene-1-carboxylic-acid	G3DSA:3.40.50.970 (GENE3D) | IPR032264 (PFAM) | G3DSA:3.40.50.970 (GENE3D) | G3DSA:3.40.50.1220 (GENE3D) | IPR004433 (PANTHER) | IPR029035 (SUPERFAMILY)	F:GO:0030976 | F:GO:0070204 | P:GO:0009234	F:thiamine pyrophosphate binding	P:menaquinone biosynthetic process
	VvCarFPS02VCR702_v1_PsGc_1007.ver1_0.g002930.m01	VvCarFPS02VCR702_v1_PsGc_1007.ver1_0.g002930	0	chloroplastic isoform X1	P:GO:0009058 | P:GO:0044763 | F:GO:0005488 | F:GO:0016740 | P:GO:0044711 | P:GO:0009987	P:biosynthetic process | P:single-organism cellular process | F:binding | F:transferase activity | P:single-organism biosynthetic process | P:cellular process	EC:2.2.1.9	2-succinyl-5-enolpyruvyl-6-hydroxy-3-cyclohexene-1-carboxylic-acid	Coil (COILS) | IPR012001 (PFAM) | G3DSA:3.40.50.970 (GENE3D) | IPR004433 (PANTHER) | cd07037 (CDD) | IPR029061 (SUPERFAMILY)	F:GO:0030976 | F:GO:0070204 | P:GO:0009234	F:thiamine pyrophosphate binding	P:menaquinone biosynthetic process
	VvCarFPS02VCR702_v1_PsGc_1007.ver1_0.g002940.m01	VvCarFPS02VCR702_v1_PsGc_1007.ver1_0.g002940	0	probable copper-transporting ATPase HMA5	0	0	0	0	TMhelix (TMHMM)	no GO terms	no GO terms
	VvCarFPS02VCR702_v1_PsGc_1007.ver1_0.g002950.m01	VvCarFPS02VCR702_v1_PsGc_1007.ver1_0.g002950	0	GMP synthase (glutamine-hydrolyzing) glutamine amidotransferase	F:GO:0000166 | F:GO:0016787	F:nucleotide binding | F:hydrolase activity	0	0	G3DSA:3.30.300.10 (GENE3D) | IPR014729 (G3DSA:3.40.50.GENE3D) | PTHR11922:SF2 (PANTHER) | PTHR11922 (PANTHER) | IPR025777 (PROSITE_PROFILES) | SSF52402 (SUPERFAMILY)	F:GO:0005524 | F:GO:0016462	F:ATP binding
	VvCarFPS02VCR702_v1_PsGc_1007.ver1_0.g002960.m01	VvCarFPS02VCR702_v1_PsGc_1007.ver1_0.g002960	0	TCP-1 cpn60 chaperonin family	F:GO:0000166 | C:GO:0009536 | P:GO:0009987	F:nucleotide binding | C:plastid | P:cellular process	0	0	Coil (COILS) | IPR001844 (PRINTS) | IPR002423 (PFAM) | IPR001844 (TIGRFAM) | IPR027409 (G3DSA:3.50.7.GENE3D) | IPR027410 (G3DSA:3.30.260.GENE3D) | IPR027413 (G3DSA:1.10.560.GENE3D) | mobidb-lite (MOBIDB_LITE) | IPR002423 (PANTHER) | PTHR11353:SF81 (PANTHER) | IPR018370 (PROSITE_PATTERNS) | IPR001844 (CDD) | IPR027409 (SUPERFAMILY) | IPR027413 (SUPERFAMILY) | IPR027410 (SUPERFAMILY)	F:GO:0005524 | C:GO:0005737 | P:GO:0042026 | P:GO:0006457	F:ATP binding	P:protein refolding	P:protein folding
	VvCarFPS02VCR702_v1_PsGc_1007.ver1_0.g002970.m01	VvCarFPS02VCR702_v1_PsGc_1007.ver1_0.g002970	0	BZIP transcription factor	F:GO:0003677 | F:GO:0003700 | P:GO:0009058 | P:GO:0006139 | C:GO:0005622	F:DNA binding | F:transcription factor activity, sequence-specific DNA binding | P:biosynthetic process | P:nucleobase-containing compound metabolic process | C:intracellular	0	0	Coil (COILS) | IPR004827 (SMART) | G3DSA:1.20.5.170 (GENE3D) | IPR004827 (PFAM) | PTHR22952 (PANTHER) | PTHR22952:SF133 (PANTHER) | IPR004827 (PROSITE_PATTERNS) | IPR004827 (PROSITE_PROFILES) | cd14702 (CDD) | SSF57959 (SUPERFAMILY)	F:GO:0003700 | P:GO:0006355	F:transcription factor activity, sequence-specific DNA binding
	VvCarFPS02VCR702_v1_PsGc_1007.ver1_0.g002980.m01	VvCarFPS02VCR702_v1_PsGc_1007.ver1_0.g002980	0	E3 ubiquitin- (DUF177)	0	0	0	0	PTHR37734 (PANTHER) | SignalP-TM (SIGNALP_GRAM_POSITIVE)	no GO terms	no GO terms
	VvCarFPS02VCR702_v1_PsGc_1007.ver1_0.g002990.m01	VvCarFPS02VCR702_v1_PsGc_1007.ver1_0.g002990	0	choline ethanolaminephosphotransferase 1-like	C:GO:0016020 | P:GO:0006629 | P:GO:0009058 | P:GO:0044763 | F:GO:0016740 | P:GO:0044711 | P:GO:0009987	C:membrane | P:lipid metabolic process | P:biosynthetic process | P:single-organism cellular process | F:transferase activity | P:single-organism biosynthetic process | P:cellular process	0	0	G3DSA:1.20.120.1760 (GENE3D) | IPR000462 (PFAM) | IPR014472 (PIRSF) | PTHR10414:SF49 (PANTHER) | IPR014472 (PANTHER) | IPR000462 (PROSITE_PATTERNS) | TMhelix (TMHMM) | TMhelix (TMHMM) | TMhelix (TMHMM) | TMhelix (TMHMM) | TMhelix (TMHMM) | TMhelix (TMHMM) | TMhelix (TMHMM)	C:GO:0016020 | P:GO:0008654 | F:GO:0016780	C:membrane	F:phosphotransferase activity, for other substituted phosphate groups
	VvCarFPS02VCR702_v1_PsGc_1007.ver1_0.g003000.m01	VvCarFPS02VCR702_v1_PsGc_1007.ver1_0.g003000	0	Peroxidase 48	F:GO:0003824 | P:GO:0009056 | C:GO:0005576 | F:GO:0005488 | P:GO:0006950 | P:GO:0009987	F:catalytic activity | P:catabolic process | C:extracellular region | F:binding | P:response to stress | P:cellular process	EC:1.11.1.7	Peroxidase	IPR002016 (PRINTS) | IPR000823 (PRINTS) | G3DSA:1.10.420.10 (GENE3D) | IPR002016 (PFAM) | G3DSA:1.10.520.10 (GENE3D) | PTHR31235 (PANTHER) | PTHR31235:SF55 (PANTHER) | IPR019793 (PROSITE_PATTERNS) | IPR002016 (PROSITE_PROFILES) | IPR033905 (CDD) | IPR010255 (SUPERFAMILY)	F:GO:0004601 | P:GO:0006979 | P:GO:0055114 | F:GO:0020037 | P:GO:0042744	F:peroxidase activity	P:oxidation-reduction process	F:heme binding	P:hydrogen peroxide catabolic process
	VvCarFPS02VCR702_v1_PsGc_1007.ver1_0.g003010.m01	VvCarFPS02VCR702_v1_PsGc_1007.ver1_0.g003010	0	hypothetical protein CICLE_v10013834mg	0	0	0	0	IPR012511 (PFAM) | PTHR35727 (PANTHER) | PTHR35727:SF1 (PANTHER)	no GO terms	no GO terms
	VvCarFPS02VCR702_v1_PsGc_1007.ver1_0.g003020.m01	VvCarFPS02VCR702_v1_PsGc_1007.ver1_0.g003020	0	S-adenosylmethionine decarboxylase proenzyme	F:GO:0003824 | C:GO:0005829 | P:GO:0009058 | P:GO:0044763 | P:GO:0009987	F:catalytic activity | C:cytosol | P:biosynthetic process | P:single-organism cellular process | P:cellular process	EC:4.1.1.50	Adenosylmethionine decarboxylase	IPR001985 (PIRSF) | IPR001985 (PFAM) | G3DSA:3.30.360.50 (GENE3D) | IPR001985 (TIGRFAM) | G3DSA:3.60.90.10 (GENE3D) | IPR001985 (PANTHER) | PTHR11570:SF15 (PANTHER) | IPR018166 (PROSITE_PATTERNS) | IPR016067 (SUPERFAMILY)	P:GO:0008295 | P:GO:0006597 | F:GO:0004014	P:spermidine biosynthetic process	F:adenosylmethionine decarboxylase activity
	VvCarFPS02VCR702_v1_PsGc_1007.ver1_0.g003030.m01	VvCarFPS02VCR702_v1_PsGc_1007.ver1_0.g003030	0	NSP-INTERACTING KINASE 2	F:GO:0000166 | F:GO:0005515 | C:GO:0016020 | P:GO:0006464 | F:GO:0016301	F:nucleotide binding | F:protein binding | C:membrane | P:cellular protein modification process | F:kinase activity	0	0	IPR000719 (SMART) | IPR032675 (G3DSA:3.80.10.GENE3D) | IPR013210 (PFAM) | IPR001611 (PFAM) | IPR000719 (PFAM) | G3DSA:1.10.510.10 (GENE3D) | G3DSA:3.30.200.20 (GENE3D) | PTHR27001 (PANTHER) | PTHR27001:SF217 (PANTHER) | IPR017441 (PROSITE_PATTERNS) | IPR008271 (PROSITE_PATTERNS) | IPR000719 (PROSITE_PROFILES) | SignalP-noTM (SIGNALP_EUK) | SSF52058 (SUPERFAMILY) | IPR011009 (SUPERFAMILY) | TMheli…	F:GO:0005524 | F:GO:0005515 | F:GO:0004672 | P:GO:0006468	F:ATP binding	F:protein kinase activity	P:protein phosphorylation
	VvCarFPS02VCR702_v1_PsGc_1007.ver1_0.g003040.m01	VvCarFPS02VCR702_v1_PsGc_1007.ver1_0.g003040	0	F-box RNI FBD-like domain	F:GO:0005515	F:protein binding	0	0	IPR006566 (SMART) | IPR032675 (G3DSA:3.80.10.GENE3D) | IPR006566 (PFAM) | IPR001810 (PFAM) | IPR013101 (PFAM) | PTHR44451 (PANTHER) | PTHR44451:SF2 (PANTHER) | IPR036047 (SUPERFAMILY) | SSF52047 (SUPERFAMILY)	F:GO:0005515	F:protein binding
	VvCarFPS02VCR702_v1_PsGc_1007.ver1_0.g003050.m01	VvCarFPS02VCR702_v1_PsGc_1007.ver1_0.g003050	0	F-box RNI FBD-like domain	F:GO:0005515	F:protein binding	0	0	IPR006566 (SMART) | IPR013101 (PFAM) | IPR032675 (G3DSA:3.80.10.GENE3D) | IPR001810 (PFAM) | PTHR44451 (PANTHER) | PTHR44451:SF3 (PANTHER) | IPR001810 (PROSITE_PROFILES) | IPR036047 (SUPERFAMILY) | SSF52047 (SUPERFAMILY)	F:GO:0005515	F:protein binding
	VvCarFPS02VCR702_v1_PsGc_1007.ver1_0.g003060.m01	VvCarFPS02VCR702_v1_PsGc_1007.ver1_0.g003060	0	F-box RNI FBD-like domain	0	0	0	0	IPR006566 (SMART) | IPR006566 (PFAM) | PTHR44451 (PANTHER)	no GO terms	no GO terms
	VvCarFPS02VCR702_v1_PsGc_1007.ver1_0.g003070.m01	VvCarFPS02VCR702_v1_PsGc_1007.ver1_0.g003070	0	phosphoribulokinase uridine kinase family	C:GO:0016020	C:membrane	0	0	Coil (COILS) | G3DSA:1.20.5.340 (GENE3D)	no GO terms	no GO terms
	VvCarFPS02VCR702_v1_PsGc_1007.ver1_0.g003080.m01	VvCarFPS02VCR702_v1_PsGc_1007.ver1_0.g003080	0	phosphoribulokinase uridine kinase family	F:GO:0000166 | F:GO:0016301	F:nucleotide binding | F:kinase activity	0	0	PR00988 (PRINTS) | IPR006083 (PFAM) | G3DSA:3.40.50.300 (GENE3D) | PTHR10285 (PANTHER) | PTHR10285:SF76 (PANTHER) | cd02028 (CDD) | IPR027417 (SUPERFAMILY)	F:GO:0005524 | P:GO:0008152 | F:GO:0016301	F:ATP binding	F:kinase activity
	VvCarFPS02VCR702_v1_PsGc_1007.ver1_0.g003090.m01	VvCarFPS02VCR702_v1_PsGc_1007.ver1_0.g003090	0	peroxidase 11	F:GO:0003824 | P:GO:0009056 | C:GO:0005576 | F:GO:0005488 | P:GO:0006950 | P:GO:0009987	F:catalytic activity | P:catabolic process | C:extracellular region | F:binding | P:response to stress | P:cellular process	EC:1.11.1.7	Peroxidase	IPR000823 (PRINTS) | IPR002016 (PRINTS) | IPR002016 (PFAM) | G3DSA:1.10.520.10 (GENE3D) | G3DSA:1.10.420.10 (GENE3D) | PTHR31388 (PANTHER) | PTHR31388:SF9 (PANTHER) | IPR019793 (PROSITE_PATTERNS) | IPR019794 (PROSITE_PATTERNS) | IPR002016 (PROSITE_PROFILES) | IPR033905 (CDD) | SignalP-noTM (SIGNALP_EUK) | IPR010255 (SUPERFAMILY)	F:GO:0004601 | P:GO:0006979 | P:GO:0055114 | F:GO:0020037 | P:GO:0042744	F:peroxidase activity	P:oxidation-reduction process	F:heme binding	P:hydrogen peroxide catabolic process
	VvCarFPS02VCR702_v1_PsGc_1007.ver1_0.g003100.m01	VvCarFPS02VCR702_v1_PsGc_1007.ver1_0.g003100	0	plant MWL2-17	C:GO:0005829	C:cytosol	0	0	PTHR37227 (PANTHER)	no GO terms	no GO terms
	VvCarFPS02VCR702_v1_PsGc_1007.ver1_0.g003110.m01	VvCarFPS02VCR702_v1_PsGc_1007.ver1_0.g003110	0	ASC1 1	C:GO:0016020 | C:GO:0005783	C:membrane | C:endoplasmic reticulum	0	0	IPR006634 (SMART) | IPR016439 (PIRSF) | IPR006634 (PFAM) | PTHR12560:SF22 (PANTHER) | IPR016439 (PANTHER) | IPR006634 (PROSITE_PROFILES) | TMhelix (TMHMM) | TMhelix (TMHMM) | TMhelix (TMHMM) | TMhelix (TMHMM) | TMhelix (TMHMM)	C:GO:0016021	C:integral component of membrane
	VvCarFPS02VCR702_v1_PsGc_1007.ver1_0.g003120.m01	VvCarFPS02VCR702_v1_PsGc_1007.ver1_0.g003120	0	sodium potassium calcium exchanger 1-like	0	0	0	0	mobidb-lite (MOBIDB_LITE) | PTHR33347:SF2 (PANTHER) | PTHR33347 (PANTHER)	no GO terms	no GO terms
	VvCarFPS02VCR702_v1_PsGc_1007.ver1_0.g003130.m01	VvCarFPS02VCR702_v1_PsGc_1007.ver1_0.g003130	0	6-phosphogluconate dehydrogenase family	P:GO:0005975 | F:GO:0003824 | P:GO:0006139 | P:GO:0044723	P:carbohydrate metabolic process | F:catalytic activity | P:nucleobase-containing compound metabolic process | P:single-organism carbohydrate metabolic process	EC:1.1.1.44	Phosphogluconate dehydrogenase (NADP(+)-dependent, decarboxylating)	IPR006183 (PRINTS) | IPR006114 (SMART) | IPR006113 (TIGRFAM) | IPR006113 (PIRSF) | IPR006114 (PFAM) | IPR006115 (PFAM) | G3DSA:1.20.5.320 (GENE3D) | IPR013328 (G3DSA:1.10.1040.GENE3D) | G3DSA:3.40.50.720 (GENE3D) | PTHR11811 (PANTHER) | PTHR11811:SF33 (PANTHER) | IPR008927 (SUPERFAMILY) | IPR036291 (SUPERFAMILY)	F:GO:0004616 | P:GO:0006098 | F:GO:0016491 | P:GO:0055114	F:phosphogluconate dehydrogenase (decarboxylating) activity	F:oxidoreductase activity	P:oxidation-reduction process
	VvCarFPS02VCR702_v1_PsGc_1007.ver1_0.g003140.m01	VvCarFPS02VCR702_v1_PsGc_1007.ver1_0.g003140	0	serotonin N-acetyltransferase chloroplastic	P:GO:0019538 | P:GO:0009058 | F:GO:0016740 | P:GO:0009987	P:protein metabolic process | P:biosynthetic process | F:transferase activity | P:cellular process	0	0	G3DSA:3.40.630.30 (GENE3D) | IPR000182 (PFAM) | PTHR43626 (PANTHER) | PTHR43626:SF2 (PANTHER) | IPR000182 (PROSITE_PROFILES) | cd04301 (CDD) | SignalP-TM (SIGNALP_GRAM_POSITIVE) | IPR016181 (SUPERFAMILY)	no GO terms	no GO terms
	VvCarFPS02VCR702_v1_PsGc_1007.ver1_0.g003150.m01	VvCarFPS02VCR702_v1_PsGc_1007.ver1_0.g003150	0	DHHC-type zinc finger	C:GO:0016020	C:membrane	0	0	IPR001594 (PFAM) | PTHR22883:SF35 (PANTHER) | PTHR22883 (PANTHER) | PS50216 (PROSITE_PROFILES) | TMhelix (TMHMM) | TMhelix (TMHMM) | TMhelix (TMHMM) | TMhelix (TMHMM)	no GO terms	no GO terms
	VvCarFPS02VCR702_v1_PsGc_1007.ver1_0.g003160.m01	VvCarFPS02VCR702_v1_PsGc_1007.ver1_0.g003160	0	YGGT family	C:GO:0016020 | C:GO:0009536 | C:GO:0009579	C:membrane | C:plastid | C:thylakoid	0	0	IPR003425 (PFAM) | PTHR33219:SF11 (PANTHER) | IPR003425 (PANTHER) | TMhelix (TMHMM) | TMhelix (TMHMM)	C:GO:0016020	C:membrane
	VvCarFPS02VCR702_v1_PsGc_1007.ver1_0.g003170.m01	VvCarFPS02VCR702_v1_PsGc_1007.ver1_0.g003170	0	anamorsin homolog	C:GO:0005737 | P:GO:0016043 | P:GO:0009058 | F:GO:0016740 | F:GO:0005488	C:cytoplasm | P:cellular component organization | P:biosynthetic process | F:transferase activity | F:binding	0	0	IPR013216 (PFAM) | G3DSA:3.40.50.150 (GENE3D) | IPR007785 (PFAM) | IPR007785 (PANTHER) | IPR007785 (HAMAP) | IPR029063 (SUPERFAMILY)	C:GO:0005737 | P:GO:0008152 | F:GO:0008168 | F:GO:0051536 | P:GO:0016226	C:cytoplasm	F:methyltransferase activity	F:iron-sulfur cluster binding	P:iron-sulfur cluster assembly
	VvCarFPS02VCR702_v1_PsGc_1009.ver1_0.g003180.m01	VvCarFPS02VCR702_v1_PsGc_1009.ver1_0.g003180	0	E3 ubiquitin- ligase ATL42	0	0	0	0	no IPS match	no IPS match	no IPS match
	VvCarFPS02VCR702_v1_PsGc_1009.ver1_0.g003190.m01	VvCarFPS02VCR702_v1_PsGc_1009.ver1_0.g003190	0	subtilisin-like serine protease	0	0	0	0	no IPS match	no IPS match	no IPS match
	VvCarFPS02VCR702_v1_PsGc_1009.ver1_0.g003200.m01	VvCarFPS02VCR702_v1_PsGc_1009.ver1_0.g003200	0	transmembrane 45B	C:GO:0016020	C:membrane	0	0	mobidb-lite (MOBIDB_LITE) | IPR006904 (PANTHER) | PTHR16007:SF43 (PANTHER) | TMhelix (TMHMM)	no GO terms	no GO terms
	VvCarFPS02VCR702_v1_PsGc_101.ver1_0.g003210.m01	VvCarFPS02VCR702_v1_PsGc_101.ver1_0.g003210	0	Disease resistance (TIR-NBS-LRR class) family	0	0	0	0	IPR032675 (G3DSA:3.80.10.GENE3D) | IPR032675 (G3DSA:3.80.10.GENE3D) | PTHR11017 (PANTHER) | SSF52058 (SUPERFAMILY)	no GO terms	no GO terms
	VvCarFPS02VCR702_v1_PsGc_101.ver1_0.g003220.m01	VvCarFPS02VCR702_v1_PsGc_101.ver1_0.g003220	0	TMV resistance N	0	0	0	0	PTHR34630 (PANTHER)	no GO terms	no GO terms
	VvCarFPS02VCR702_v1_PsGc_101.ver1_0.g003230.m01	VvCarFPS02VCR702_v1_PsGc_101.ver1_0.g003230	0	V-type proton ATPase subunit G-like	C:GO:0016020 | C:GO:0005773 | P:GO:0044765 | P:GO:0006810 | F:GO:0005215 | F:GO:0016787	C:membrane | C:vacuole | P:single-organism transport | P:transport | F:transporter activity | F:hydrolase activity	EC:3.6.1.3 | EC:3.6.1.15	Adenosinetriphosphatase | Nucleoside-triphosphate phosphatase	Coil (COILS) | IPR005124 (PFAM) | G3DSA:1.20.5.620 (GENE3D) | IPR005124 (TIGRFAM) | PTHR12713:SF14 (PANTHER) | IPR005124 (PANTHER)	F:GO:0042626 | P:GO:0015992 | C:GO:0016471	F:ATPase activity, coupled to transmembrane movement of substances	C:vacuolar proton-transporting V-type ATPase complex
	VvCarFPS02VCR702_v1_PsGc_101.ver1_0.g003240.m01	VvCarFPS02VCR702_v1_PsGc_101.ver1_0.g003240	0	V-type proton ATPase subunit G-like	C:GO:0016020 | C:GO:0005773 | P:GO:0044765 | P:GO:0006810 | F:GO:0005215 | F:GO:0016787	C:membrane | C:vacuole | P:single-organism transport | P:transport | F:transporter activity | F:hydrolase activity	EC:3.6.1.3 | EC:3.6.1.15	Adenosinetriphosphatase | Nucleoside-triphosphate phosphatase	Coil (COILS) | G3DSA:1.20.5.620 (GENE3D) | IPR005124 (PFAM) | IPR005124 (TIGRFAM) | mobidb-lite (MOBIDB_LITE) | IPR005124 (PANTHER) | PTHR12713:SF14 (PANTHER)	F:GO:0042626 | P:GO:0015992 | C:GO:0016471	F:ATPase activity, coupled to transmembrane movement of substances	C:vacuolar proton-transporting V-type ATPase complex
	VvCarFPS02VCR702_v1_PsGc_101.ver1_0.g003250.m01	VvCarFPS02VCR702_v1_PsGc_101.ver1_0.g003250	0	TMV resistance N	F:GO:0000166 | F:GO:0005515 | P:GO:0007165	F:nucleotide binding | F:protein binding | P:signal transduction	0	0	PR00364 (PRINTS) | IPR000157 (SMART) | IPR003591 (SMART) | IPR035897 (G3DSA:3.40.50.GENE3D) | IPR002182 (PFAM) | IPR032675 (G3DSA:3.80.10.GENE3D) | G3DSA:1.10.8.430 (GENE3D) | IPR032675 (G3DSA:3.80.10.GENE3D) | G3DSA:3.40.50.300 (GENE3D) | IPR000157 (PFAM) | mobidb-lite (MOBIDB_LITE) | IPR000157 (PROSITE_PROFILES) | IPR035897 (SUPERFAMILY) | SSF52058 (SUPERFAMILY) | IPR036390 (SUPERFAMILY) | IPR0…	F:GO:0005515 | P:GO:0007165 | F:GO:0043531	F:protein binding	F:ADP binding
	VvCarFPS02VCR702_v1_PsGc_101.ver1_0.g003260.m01	VvCarFPS02VCR702_v1_PsGc_101.ver1_0.g003260	0	disease resistance (TIR-NBS-LRR class)	F:GO:0000166 | F:GO:0005515 | P:GO:0007165	F:nucleotide binding | F:protein binding | P:signal transduction	0	0	PR00364 (PRINTS) | IPR003591 (SMART) | IPR000157 (SMART) | IPR032675 (G3DSA:3.80.10.GENE3D) | G3DSA:3.40.50.300 (GENE3D) | IPR035897 (G3DSA:3.40.50.GENE3D) | IPR000157 (PFAM) | IPR002182 (PFAM) | IPR032675 (G3DSA:3.80.10.GENE3D) | IPR000157 (PROSITE_PROFILES) | SSF52058 (SUPERFAMILY) | IPR036390 (SUPERFAMILY) | SSF52058 (SUPERFAMILY) | IPR035897 (SUPERFAMILY) | IPR027417 (SUPERFAMILY)	F:GO:0005515 | P:GO:0007165 | F:GO:0043531	F:protein binding	F:ADP binding
	VvCarFPS02VCR702_v1_PsGc_1010.ver1_0.g003270.m01	VvCarFPS02VCR702_v1_PsGc_1010.ver1_0.g003270	0	uncharacterized serine-rich -like	0	0	0	0	mobidb-lite (MOBIDB_LITE) | mobidb-lite (MOBIDB_LITE) | PTHR34952:SF2 (PANTHER) | PTHR34952 (PANTHER)	no GO terms	no GO terms
	VvCarFPS02VCR702_v1_PsGc_1010.ver1_0.g003280.m01	VvCarFPS02VCR702_v1_PsGc_1010.ver1_0.g003280	0	arginine biosynthesis bifunctional chloroplastic	P:GO:0019538 | P:GO:0009058 | P:GO:0044763 | F:GO:0016740 | P:GO:0044711 | C:GO:0009536 | P:GO:0009987	P:protein metabolic process | P:biosynthetic process | P:single-organism cellular process | F:transferase activity | P:single-organism biosynthetic process | C:plastid | P:cellular process	EC:2.3.1.35	Glutamate N-acetyltransferase	G3DSA:3.30.2330.10 (GENE3D) | IPR002813 (PFAM) | IPR002813 (TIGRFAM) | G3DSA:3.10.20.340 (GENE3D) | IPR016117 (G3DSA:3.60.70.GENE3D) | IPR002813 (PANTHER) | PTHR23100:SF3 (PANTHER) | PD004193 (PRODOM) | IPR002813 (HAMAP) | IPR002813 (CDD) | IPR016117 (SUPERFAMILY)	F:GO:0004358 | P:GO:0006526	F:glutamate N-acetyltransferase activity
	VvCarFPS02VCR702_v1_PsGc_1010.ver1_0.g003290.m01	VvCarFPS02VCR702_v1_PsGc_1010.ver1_0.g003290	0	glycine-rich RNA-binding mitochondrial-like	F:GO:0003676	F:nucleic acid binding	0	0	IPR000504 (SMART) | IPR012677 (G3DSA:3.30.70.GENE3D) | IPR000504 (PFAM) | mobidb-lite (MOBIDB_LITE) | PTHR45392 (PANTHER) | IPR000504 (PROSITE_PROFILES) | IPR035979 (SUPERFAMILY)	F:GO:0003676	F:nucleic acid binding
	VvCarFPS02VCR702_v1_PsGc_1010.ver1_0.g003300.m01	VvCarFPS02VCR702_v1_PsGc_1010.ver1_0.g003300	0	nodulin-like MFS transporter	0	0	0	0	SignalP-TM (SIGNALP_GRAM_POSITIVE) | SignalP-noTM (SIGNALP_EUK) | TMhelix (TMHMM)	no GO terms	no GO terms
	VvCarFPS02VCR702_v1_PsGc_1010.ver1_0.g003310.m01	VvCarFPS02VCR702_v1_PsGc_1010.ver1_0.g003310	0	PHD zinc finger	F:GO:0005488	F:binding	0	0	IPR001965 (SMART) | G3DSA:3.40.630.30 (GENE3D) | IPR013083 (G3DSA:3.30.40.GENE3D) | IPR013083 (G3DSA:3.30.40.GENE3D) | IPR032308 (PFAM) | mobidb-lite (MOBIDB_LITE) | PTHR42672 (PANTHER) | PTHR42672:SF4 (PANTHER) | IPR019786 (PROSITE_PATTERNS) | IPR019786 (PROSITE_PATTERNS) | IPR019787 (PROSITE_PROFILES) | IPR019787 (PROSITE_PROFILES) | IPR000182 (PROSITE_PROFILES) | cd15539 (CDD) | cd04301 (CDD) …	no GO terms	no GO terms
	VvCarFPS02VCR702_v1_PsGc_1010.ver1_0.g003320.m01	VvCarFPS02VCR702_v1_PsGc_1010.ver1_0.g003320	0	GDSL-like lipase acylhydrolase	0	0	0	0	PTHR38527:SF2 (PANTHER) | PTHR38527 (PANTHER)	no GO terms	no GO terms
	VvCarFPS02VCR702_v1_PsGc_1010.ver1_0.g003330.m01	VvCarFPS02VCR702_v1_PsGc_1010.ver1_0.g003330	0	actin-depolymerizing factor family	C:GO:0005856 | F:GO:0005515 | P:GO:0016043	C:cytoskeleton | F:protein binding | P:cellular component organization	0	0	IPR002108 (SMART) | IPR002108 (PFAM) | IPR029006 (G3DSA:3.40.20.GENE3D) | PTHR11913:SF50 (PANTHER) | IPR017904 (PANTHER) | IPR002108 (PROSITE_PROFILES) | IPR017904 (CDD) | SSF55753 (SUPERFAMILY)	F:GO:0003779 | P:GO:0030042 | C:GO:0015629 | C:GO:0005622	F:actin binding	C:actin cytoskeleton	C:intracellular
	VvCarFPS02VCR702_v1_PsGc_1010.ver1_0.g003340.m01	VvCarFPS02VCR702_v1_PsGc_1010.ver1_0.g003340	0	pentatricopeptide repeat-containing At1g74580	F:GO:0005515 | C:GO:0009536	F:protein binding | C:plastid	0	0	IPR011990 (G3DSA:1.25.40.GENE3D) | IPR002885 (PFAM) | IPR011990 (G3DSA:1.25.40.GENE3D) | IPR002885 (TIGRFAM) | IPR002885 (PFAM) | IPR011990 (G3DSA:1.25.40.GENE3D) | IPR002885 (PFAM) | PTHR24015:SF993 (PANTHER) | PTHR24015:SF993 (PANTHER) | PTHR24015 (PANTHER) | IPR002885 (PROSITE_PROFILES) | IPR002885 (PROSITE_PROFILES) | IPR002885 (PROSITE_PROFILES) | IPR002885 (PROSITE_PROFILES) | IPR002885 (PR…	F:GO:0005515	F:protein binding
	VvCarFPS02VCR702_v1_PsGc_1010.ver1_0.g003350.m01	VvCarFPS02VCR702_v1_PsGc_1010.ver1_0.g003350	0	E3 ubiquitin- ligase	0	0	0	0	no IPS match	no IPS match	no IPS match
	VvCarFPS02VCR702_v1_PsGc_1010.ver1_0.g003360.m01	VvCarFPS02VCR702_v1_PsGc_1010.ver1_0.g003360	0	E3 ubiquitin- ligase RING1	0	0	0	0	IPR001841 (SMART) | IPR013083 (G3DSA:3.30.40.GENE3D) | IPR001841 (PFAM) | PTHR45491 (PANTHER) | IPR001841 (PROSITE_PROFILES) | cd16454 (CDD) | SSF57850 (SUPERFAMILY)	no GO terms	no GO terms
	VvCarFPS02VCR702_v1_PsGc_1010.ver1_0.g003370.m01	VvCarFPS02VCR702_v1_PsGc_1010.ver1_0.g003370	0	UNC93 3	C:GO:0016020	C:membrane	0	0	G3DSA:1.20.1250.20 (GENE3D) | IPR010291 (PFAM) | mobidb-lite (MOBIDB_LITE) | PTHR19444:SF13 (PANTHER) | PTHR19444 (PANTHER) | IPR036259 (SUPERFAMILY) | TMhelix (TMHMM) | TMhelix (TMHMM) | TMhelix (TMHMM) | TMhelix (TMHMM) | TMhelix (TMHMM) | TMhelix (TMHMM) | TMhelix (TMHMM) | TMhelix (TMHMM) | TMhelix (TMHMM) | TMhelix (TMHMM)	no GO terms	no GO terms
	VvCarFPS02VCR702_v1_PsGc_1010.ver1_0.g003380.m01	VvCarFPS02VCR702_v1_PsGc_1010.ver1_0.g003380	0	forkhead box G1	C:GO:0016020	C:membrane	0	0	PTHR34658 (PANTHER) | TMhelix (TMHMM) | TMhelix (TMHMM)	no GO terms	no GO terms
	VvCarFPS02VCR702_v1_PsGc_1010.ver1_0.g003390.m01	VvCarFPS02VCR702_v1_PsGc_1010.ver1_0.g003390	0	short-chain dehydrogenase TIC chloroplastic-like	F:GO:0003824	F:catalytic activity	0	0	IPR002347 (PRINTS) | IPR002347 (PRINTS) | G3DSA:3.40.50.720 (GENE3D) | IPR002347 (PFAM) | PTHR24320 (PANTHER) | PTHR24320:SF81 (PANTHER) | cd05327 (CDD) | IPR036291 (SUPERFAMILY)	no GO terms	no GO terms
	VvCarFPS02VCR702_v1_PsGc_1010.ver1_0.g003400.m01	VvCarFPS02VCR702_v1_PsGc_1010.ver1_0.g003400	0	probable ADP-ribosylation factor GTPase-activating AGD6	F:GO:0030234	F:enzyme regulator activity	0	0	IPR001164 (PRINTS) | IPR001164 (SMART) | IPR038508 (G3DSA:3.30.40.GENE3D) | IPR001164 (PFAM) | mobidb-lite (MOBIDB_LITE) | mobidb-lite (MOBIDB_LITE) | PTHR23180 (PANTHER) | PTHR23180:SF35 (PANTHER) | IPR001164 (PROSITE_PROFILES) | IPR037278 (SUPERFAMILY)	F:GO:0005096	F:GTPase activator activity
	VvCarFPS02VCR702_v1_PsGc_1010.ver1_0.g003410.m01	VvCarFPS02VCR702_v1_PsGc_1010.ver1_0.g003410	0	Cation H(+) antiporter 20	0	0	0	0	PTHR32468 (PANTHER) | PTHR32468:SF10 (PANTHER)	no GO terms	no GO terms
	VvCarFPS02VCR702_v1_PsGc_1010.ver1_0.g003420.m01	VvCarFPS02VCR702_v1_PsGc_1010.ver1_0.g003420	0	Cation H(+) antiporter 20	0	0	0	0	PTHR32468 (PANTHER) | PTHR32468:SF10 (PANTHER)	no GO terms	no GO terms
	VvCarFPS02VCR702_v1_PsGc_1010.ver1_0.g003430.m01	VvCarFPS02VCR702_v1_PsGc_1010.ver1_0.g003430	0	cation H+ exchanger 3	C:GO:0016020 | P:GO:0006810 | F:GO:0005215	C:membrane | P:transport | F:transporter activity	0	0	G3DSA:1.20.1530.20 (GENE3D) | IPR006153 (PFAM) | PTHR32468:SF10 (PANTHER) | PTHR32468 (PANTHER) | TMhelix (TMHMM) | TMhelix (TMHMM)	F:GO:0015299 | P:GO:0006812 | P:GO:0055085 | C:GO:0016021	F:solute:proton antiporter activity	P:transmembrane transport	C:integral component of membrane
	VvCarFPS02VCR702_v1_PsGc_1011.ver1_0.g003440.m01	VvCarFPS02VCR702_v1_PsGc_1011.ver1_0.g003440	0	Helicase ARIP4	0	0	0	0	no IPS match	no IPS match	no IPS match
	VvCarFPS02VCR702_v1_PsGc_1011.ver1_0.g003450.m01	VvCarFPS02VCR702_v1_PsGc_1011.ver1_0.g003450	0	hydrolyzing O-glycosyl compounds hydrolase	P:GO:0009058 | P:GO:0006139 | C:GO:0005654	P:biosynthetic process | P:nucleobase-containing compound metabolic process | C:nucleoplasm	0	0	PTHR14898:SF5 (PANTHER) | IPR024943 (PANTHER)	C:GO:0035267 | C:GO:0032777 | P:GO:0006357	C:NuA4 histone acetyltransferase complex	P:regulation of transcription from RNA polymerase II promoter
	VvCarFPS02VCR702_v1_PsGc_1011.ver1_0.g003460.m01	VvCarFPS02VCR702_v1_PsGc_1011.ver1_0.g003460	0	GDSL-like lipase acylhydrolase	F:GO:0016787	F:hydrolase activity	0	0	IPR036514 (G3DSA:3.40.50.GENE3D) | PTHR22835:SF328 (PANTHER) | PTHR22835 (PANTHER)	no GO terms	no GO terms
	VvCarFPS02VCR702_v1_PsGc_1011.ver1_0.g003470.m01	VvCarFPS02VCR702_v1_PsGc_1011.ver1_0.g003470	0	GDSL esterase lipase At5g45670-like	0	0	0	0	PTHR22835:SF328 (PANTHER) | PTHR22835 (PANTHER)	no GO terms	no GO terms
	VvCarFPS02VCR702_v1_PsGc_1011.ver1_0.g003480.m01	VvCarFPS02VCR702_v1_PsGc_1011.ver1_0.g003480	0	GDSL esterase lipase	0	0	0	0	PTHR22835:SF328 (PANTHER) | PTHR22835 (PANTHER) | SignalP-noTM (SIGNALP_EUK)	no GO terms	no GO terms
	VvCarFPS02VCR702_v1_PsGc_1011.ver1_0.g003490.m01	VvCarFPS02VCR702_v1_PsGc_1011.ver1_0.g003490	0	GDSL-like lipase acylhydrolase	F:GO:0016787	F:hydrolase activity	0	0	IPR036514 (G3DSA:3.40.50.GENE3D) | IPR001087 (PFAM) | PTHR22835:SF328 (PANTHER) | PTHR22835 (PANTHER) | IPR035669 (CDD) | SignalP-TM (SIGNALP_GRAM_POSITIVE) | SignalP-noTM (SIGNALP_EUK)	F:GO:0016788	F:hydrolase activity, acting on ester bonds
	VvCarFPS02VCR702_v1_PsGc_1011.ver1_0.g003500.m01	VvCarFPS02VCR702_v1_PsGc_1011.ver1_0.g003500	0	GDSL-like lipase acylhydrolase	F:GO:0016787	F:hydrolase activity	0	0	Coil (COILS) | IPR036514 (G3DSA:3.40.50.GENE3D) | IPR001087 (PFAM) | PTHR22835 (PANTHER) | PTHR22835:SF487 (PANTHER) | IPR035669 (CDD) | SignalP-noTM (SIGNALP_EUK) | SignalP-noTM (SIGNALP_GRAM_NEGATIVE) | SignalP-TM (SIGNALP_GRAM_POSITIVE)	F:GO:0016788	F:hydrolase activity, acting on ester bonds
	VvCarFPS02VCR702_v1_PsGc_1011.ver1_0.g003510.m01	VvCarFPS02VCR702_v1_PsGc_1011.ver1_0.g003510	0	kinase superfamily	F:GO:0000166 | C:GO:0016020 | P:GO:0006464 | F:GO:0016301	F:nucleotide binding | C:membrane | P:cellular protein modification process | F:kinase activity	0	0	IPR000719 (SMART) | G3DSA:3.30.200.20 (GENE3D) | IPR001245 (PFAM) | G3DSA:1.10.510.10 (GENE3D) | PIRSF000615 (PIRSF) | PTHR27003 (PANTHER) | PTHR27003:SF16 (PANTHER) | IPR008271 (PROSITE_PATTERNS) | IPR000719 (PROSITE_PROFILES) | cd14066 (CDD) | IPR011009 (SUPERFAMILY) | TMhelix (TMHMM)	F:GO:0005524 | F:GO:0004672 | P:GO:0006468	F:ATP binding	P:protein phosphorylation
	VvCarFPS02VCR702_v1_PsGc_1011.ver1_0.g003520.m01	VvCarFPS02VCR702_v1_PsGc_1011.ver1_0.g003520	0	ERD (early-responsive to dehydration stress) family	0	0	0	0	Coil (COILS) | mobidb-lite (MOBIDB_LITE)	no GO terms	no GO terms
	VvCarFPS02VCR702_v1_PsGc_1011.ver1_0.g003530.m01	VvCarFPS02VCR702_v1_PsGc_1011.ver1_0.g003530	0	phosphatidylinositol 3- and 4-kinase family	F:GO:0016301	F:kinase activity	0	0	IPR000403 (PFAM) | PTHR15245:SF37 (PANTHER) | PTHR15245 (PANTHER) | IPR029071 (SUPERFAMILY)	no GO terms	no GO terms
	VvCarFPS02VCR702_v1_PsGc_1011.ver1_0.g003540.m01	VvCarFPS02VCR702_v1_PsGc_1011.ver1_0.g003540	0	polyadenylate-binding 2-like	F:GO:0003723	F:RNA binding	0	0	IPR002004 (SMART) | G3DSA:1.10.1900.10 (GENE3D) | IPR002004 (PFAM) | PTHR24012 (PANTHER) | PTHR24012:SF349 (PANTHER) | IPR002004 (PROSITE_PROFILES) | IPR036053 (SUPERFAMILY)	F:GO:0003723	F:RNA binding
	VvCarFPS02VCR702_v1_PsGc_1011.ver1_0.g003550.m01	VvCarFPS02VCR702_v1_PsGc_1011.ver1_0.g003550	0	aspartate aminotransferase	F:GO:0003824	F:catalytic activity	0	0	IPR015421 (G3DSA:3.40.640.GENE3D) | PTHR43795 (PANTHER) | PTHR43795:SF26 (PANTHER)	F:GO:0003824	F:catalytic activity
	VvCarFPS02VCR702_v1_PsGc_1011.ver1_0.g003560.m01	VvCarFPS02VCR702_v1_PsGc_1011.ver1_0.g003560	0	auxin-independent growth promoter	C:GO:0005768	C:endosome	0	0	IPR024709 (PIRSF) | IPR019378 (PFAM) | mobidb-lite (MOBIDB_LITE) | PTHR31741 (PANTHER) | PTHR31741:SF18 (PANTHER) | TMhelix (TMHMM)	no GO terms	no GO terms
	VvCarFPS02VCR702_v1_PsGc_1011.ver1_0.g003570.m01	VvCarFPS02VCR702_v1_PsGc_1011.ver1_0.g003570	0	LRR and NB-ARC domain disease resistance	F:GO:0000166	F:nucleotide binding	0	0	PR00364 (PRINTS) | IPR003591 (SMART) | IPR032675 (G3DSA:3.80.10.GENE3D) | G3DSA:3.40.50.300 (GENE3D) | IPR002182 (PFAM) | IPR032675 (G3DSA:3.80.10.GENE3D) | PTHR23155:SF862 (PANTHER) | PTHR23155 (PANTHER) | SSF52058 (SUPERFAMILY) | SSF52058 (SUPERFAMILY) | SSF52047 (SUPERFAMILY) | IPR027417 (SUPERFAMILY)	F:GO:0043531	F:ADP binding
	VvCarFPS02VCR702_v1_PsGc_1011.ver1_0.g003580.m01	VvCarFPS02VCR702_v1_PsGc_1011.ver1_0.g003580	0	AT-hook motif nuclear-localized 23-like	0	0	0	0	no IPS match	no IPS match	no IPS match
	VvCarFPS02VCR702_v1_PsGc_1011.ver1_0.g003590.m01	VvCarFPS02VCR702_v1_PsGc_1011.ver1_0.g003590	0	calcium-dependent phospholipid-binding copine family	P:GO:0008219 | F:GO:0008289	P:cell death | F:lipid binding	0	0	IPR002035 (SMART) | IPR000008 (SMART) | IPR035892 (G3DSA:2.60.40.GENE3D) | IPR035892 (G3DSA:2.60.40.GENE3D) | IPR000008 (PFAM) | IPR010734 (PFAM) | PTHR10857 (PANTHER) | IPR031116 (PTHR10857:PANTHER) | IPR000008 (PROSITE_PROFILES) | IPR002035 (PROSITE_PROFILES) | cd04048 (CDD) | IPR010734 (CDD) | IPR037768 (CDD) | SSF49562 (SUPERFAMILY) | SSF49562 (SUPERFAMILY) | IPR036465 (SUPERFAMILY)	P:GO:0060548 | F:GO:0005544	P:negative regulation of cell death
	VvCarFPS02VCR702_v1_PsGc_1011.ver1_0.g003600.m01	VvCarFPS02VCR702_v1_PsGc_1011.ver1_0.g003600	0	disease resistance gene NBS-LRR family	F:GO:0000166	F:nucleotide binding	0	0	PR00364 (PRINTS) | IPR002182 (PFAM) | G3DSA:3.40.50.300 (GENE3D) | PTHR44061 (PANTHER) | IPR027417 (SUPERFAMILY)	F:GO:0043531	F:ADP binding
	VvCarFPS02VCR702_v1_PsGc_1011.ver1_0.g003610.m01	VvCarFPS02VCR702_v1_PsGc_1011.ver1_0.g003610	0	disease resistance gene NBS-LRR family	F:GO:0000166 | F:GO:0005515	F:nucleotide binding | F:protein binding	0	0	Coil (COILS) | PR00364 (PRINTS) | IPR003591 (SMART) | IPR032675 (G3DSA:3.80.10.GENE3D) | IPR001611 (PFAM) | IPR002182 (PFAM) | IPR032675 (G3DSA:3.80.10.GENE3D) | G3DSA:3.40.50.300 (GENE3D) | PTHR44061 (PANTHER) | PTHR44061 (PANTHER) | PTHR44061:SF1 (PANTHER) | IPR001611 (PROSITE_PROFILES) | IPR001611 (PROSITE_PROFILES) | IPR001611 (PROSITE_PROFILES) | IPR001611 (PROSITE_PROFILES) | IPR001611 (PRO…	F:GO:0005515 | F:GO:0043531	F:protein binding
	VvCarFPS02VCR702_v1_PsGc_1011.ver1_0.g003620.m01	VvCarFPS02VCR702_v1_PsGc_1011.ver1_0.g003620	0	Glycolipid transfer	C:GO:0005737	C:cytoplasm	0	0	IPR014830 (PFAM) | IPR036497 (G3DSA:1.10.3520.GENE3D) | PTHR10219 (PANTHER) | PTHR10219:SF28 (PANTHER) | IPR036497 (SUPERFAMILY)	N/A | C:GO:0005737 | N/A	N/A	N/A
	VvCarFPS02VCR702_v1_PsGc_1011.ver1_0.g003630.m01	VvCarFPS02VCR702_v1_PsGc_1011.ver1_0.g003630	0	hypothetical protein POPTR_0006s07300g	0	0	0	0	Coil (COILS) | mobidb-lite (MOBIDB_LITE)	no GO terms	no GO terms
	VvCarFPS02VCR702_v1_PsGc_1011.ver1_0.g003640.m01	VvCarFPS02VCR702_v1_PsGc_1011.ver1_0.g003640	0	Ribosomal L30 L7 family	C:GO:0005829 | C:GO:0005840	C:cytosol | C:ribosome	0	0	Coil (COILS) | IPR023106 (G3DSA:1.10.15.GENE3D) | IPR036919 (G3DSA:3.30.1390.GENE3D) | IPR012988 (PFAM) | IPR005998 (TIGRFAM) | IPR016082 (PFAM) | PTHR11524:SF16 (PANTHER) | PTHR11524 (PANTHER) | IPR018038 (PROSITE_PATTERNS) | IPR035808 (CDD) | IPR036919 (SUPERFAMILY)	no GO terms	no GO terms
	VvCarFPS02VCR702_v1_PsGc_1012.ver1_0.g003650.m01	VvCarFPS02VCR702_v1_PsGc_1012.ver1_0.g003650	0	ALA-interacting subunit 3-like	C:GO:0016020	C:membrane	0	0	IPR005045 (PIRSF) | IPR005045 (PFAM) | mobidb-lite (MOBIDB_LITE) | mobidb-lite (MOBIDB_LITE) | PTHR10926:SF28 (PANTHER) | PTHR10926:SF28 (PANTHER) | IPR005045 (PANTHER) | IPR005045 (PANTHER) | TMhelix (TMHMM) | TMhelix (TMHMM)	C:GO:0016020	C:membrane
	VvCarFPS02VCR702_v1_PsGc_1013.ver1_0.g003660.m01	VvCarFPS02VCR702_v1_PsGc_1013.ver1_0.g003660	0	glycerol-3-phosphate dehydrogenase mitochondrial	C:GO:0005737 | F:GO:0003824 | P:GO:0006629 | P:GO:0044763 | P:GO:0009987	C:cytoplasm | F:catalytic activity | P:lipid metabolic process | P:single-organism cellular process | P:cellular process	EC:1.1.5.3	Glycerol-3-phosphate dehydrogenase	IPR000447 (PRINTS) | IPR036188 (G3DSA:3.50.50.GENE3D) | IPR000447 (PANTHER) | IPR000447 (PROSITE_PATTERNS) | SignalP-TM (SIGNALP_GRAM_POSITIVE) | IPR036188 (SUPERFAMILY)	P:GO:0006072 | C:GO:0009331 | P:GO:0055114 | F:GO:0004368	P:glycerol-3-phosphate metabolic process	P:oxidation-reduction process	F:glycerol-3-phosphate dehydrogenase activity
	VvCarFPS02VCR702_v1_PsGc_1013.ver1_0.g003670.m01	VvCarFPS02VCR702_v1_PsGc_1013.ver1_0.g003670	0	vacuolar -sorting-associated 33 homolog	P:GO:0044763 | P:GO:0044765 | P:GO:0006810 | P:GO:0009987	P:single-organism cellular process | P:single-organism transport | P:transport | P:cellular process	0	0	G3DSA:3.90.830.10 (GENE3D) | IPR027482 (G3DSA:3.40.50.GENE3D) | IPR001619 (PFAM) | IPR001619 (PIRSF) | G3DSA:1.25.40.850 (GENE3D) | G3DSA:3.40.50.2060 (GENE3D) | IPR027121 (PTHR11679:PANTHER) | IPR001619 (PANTHER) | IPR036045 (SUPERFAMILY)	P:GO:0016192 | P:GO:0006904	P:vesicle-mediated transport
	VvCarFPS02VCR702_v1_PsGc_1013.ver1_0.g003680.m01	VvCarFPS02VCR702_v1_PsGc_1013.ver1_0.g003680	0	armadillo beta-catenin repeat family	F:GO:0005515 | C:GO:0005737 | P:GO:0006464 | F:GO:0016740	F:protein binding | C:cytoplasm | P:cellular protein modification process | F:transferase activity	0	0	IPR000225 (SMART) | IPR003613 (SMART) | IPR013083 (G3DSA:3.30.40.GENE3D) | IPR000225 (PFAM) | IPR011989 (G3DSA:1.25.10.GENE3D) | IPR011989 (G3DSA:1.25.10.GENE3D) | IPR003613 (PFAM) | PTHR23315:SF111 (PANTHER) | PTHR23315 (PANTHER) | IPR003613 (PROSITE_PROFILES) | IPR000225 (PROSITE_PROFILES) | IPR000225 (PROSITE_PROFILES) | cd16664 (CDD) | SSF57850 (SUPERFAMILY) | IPR016024 (SUPERFAMILY)	F:GO:0004842 | F:GO:0005515 | F:GO:0005488 | P:GO:0016567	F:ubiquitin-protein transferase activity	F:binding	P:protein ubiquitination
	VvCarFPS02VCR702_v1_PsGc_1013.ver1_0.g003690.m01	VvCarFPS02VCR702_v1_PsGc_1013.ver1_0.g003690	0	small GTPase family RAB	F:GO:0000166 | F:GO:0016787	F:nucleotide binding | F:hydrolase activity	EC:3.6.1.15	Nucleoside-triphosphate phosphatase	PR00449 (PRINTS) | SM00173 (SMART) | SM00175 (SMART) | SM00174 (SMART) | IPR005225 (TIGRFAM) | G3DSA:3.40.50.300 (GENE3D) | IPR001806 (PFAM) | mobidb-lite (MOBIDB_LITE) | PTHR24073:SF618 (PANTHER) | PTHR24073 (PANTHER) | PS51419 (PROSITE_PROFILES) | cd01860 (CDD) | IPR027417 (SUPERFAMILY)	F:GO:0005525 | F:GO:0003924	F:GTP binding
	VvCarFPS02VCR702_v1_PsGc_1013.ver1_0.g003700.m01	VvCarFPS02VCR702_v1_PsGc_1013.ver1_0.g003700	0	probable S-acyltransferase 16	C:GO:0016020	C:membrane	0	0	IPR001594 (PFAM) | mobidb-lite (MOBIDB_LITE) | PTHR22883:SF19 (PANTHER) | PTHR22883 (PANTHER) | PS50216 (PROSITE_PROFILES) | TMhelix (TMHMM) | TMhelix (TMHMM) | TMhelix (TMHMM) | TMhelix (TMHMM)	no GO terms	no GO terms
	VvCarFPS02VCR702_v1_PsGc_1013.ver1_0.g003710.m01	VvCarFPS02VCR702_v1_PsGc_1013.ver1_0.g003710	0	vacuolar amino acid transporter 1-like	C:GO:0016020	C:membrane	0	0	IPR013057 (PFAM) | mobidb-lite (MOBIDB_LITE) | PTHR22950 (PANTHER) | PTHR22950:SF240 (PANTHER) | TMhelix (TMHMM) | TMhelix (TMHMM) | TMhelix (TMHMM) | TMhelix (TMHMM)	no GO terms	no GO terms
	VvCarFPS02VCR702_v1_PsGc_1013.ver1_0.g003720.m01	VvCarFPS02VCR702_v1_PsGc_1013.ver1_0.g003720	0	vacuolar amino acid transporter 1-like	C:GO:0016020	C:membrane	0	0	IPR013057 (PFAM) | PTHR22950:SF240 (PANTHER) | PTHR22950 (PANTHER) | TMhelix (TMHMM) | TMhelix (TMHMM) | TMhelix (TMHMM)	no GO terms	no GO terms
	VvCarFPS02VCR702_v1_PsGc_1013.ver1_0.g003730.m01	VvCarFPS02VCR702_v1_PsGc_1013.ver1_0.g003730	0	thioredoxin-like 3- chloroplastic	C:GO:0005623 | P:GO:0019725 | F:GO:0003824 | P:GO:0008152 | P:GO:0044710	C:cell | P:cellular homeostasis | F:catalytic activity | P:metabolic process | P:single-organism metabolic process	0	0	G3DSA:3.40.30.10 (GENE3D) | IPR013766 (PFAM) | IPR005746 (PANTHER) | PTHR10438:SF297 (PANTHER) | IPR013766 (PROSITE_PROFILES) | cd02947 (CDD) | IPR036249 (SUPERFAMILY)	F:GO:0015035 | P:GO:0006662 | P:GO:0045454	F:protein disulfide oxidoreductase activity	P:cell redox homeostasis
	VvCarFPS02VCR702_v1_PsGc_1013.ver1_0.g003740.m01	VvCarFPS02VCR702_v1_PsGc_1013.ver1_0.g003740	0	pumilio homolog 1-like	F:GO:0003723	F:RNA binding	0	0	IPR001313 (SMART) | IPR012940 (PFAM) | IPR011989 (G3DSA:1.25.10.GENE3D) | IPR001313 (PFAM) | mobidb-lite (MOBIDB_LITE) | mobidb-lite (MOBIDB_LITE) | mobidb-lite (MOBIDB_LITE) | PTHR12537 (PANTHER) | PTHR12537:SF71 (PANTHER) | IPR001313 (PROSITE_PROFILES) | IPR001313 (PROSITE_PROFILES) | IPR001313 (PROSITE_PROFILES) | IPR001313 (PROSITE_PROFILES) | IPR001313 (PROSITE_PROFILES) | IPR001313 (PROSITE…	F:GO:0003723 | F:GO:0005488	F:RNA binding
	VvCarFPS02VCR702_v1_PsGc_1013.ver1_0.g003750.m01	VvCarFPS02VCR702_v1_PsGc_1013.ver1_0.g003750	0	ROOT PRIMORDIUM DEFECTIVE 1	C:GO:0005739	C:mitochondrion	0	0	IPR021099 (PFAM) | PTHR31476 (PANTHER) | PTHR31476:SF13 (PANTHER)	no GO terms	no GO terms
	VvCarFPS02VCR702_v1_PsGc_1013.ver1_0.g003760.m01	VvCarFPS02VCR702_v1_PsGc_1013.ver1_0.g003760	0	OTU domain-containing 5-like isoform X1	F:GO:0016787	F:hydrolase activity	0	0	G3DSA:3.90.70.80 (GENE3D) | IPR003323 (PFAM) | mobidb-lite (MOBIDB_LITE) | PTHR12419:SF19 (PANTHER) | PTHR12419 (PANTHER) | IPR003323 (PROSITE_PROFILES) | SSF54001 (SUPERFAMILY)	no GO terms	no GO terms
	VvCarFPS02VCR702_v1_PsGc_1013.ver1_0.g003770.m01	VvCarFPS02VCR702_v1_PsGc_1013.ver1_0.g003770	0	probable serine threonine- kinase PBL19	F:GO:0000166 | P:GO:0006464 | F:GO:0016301	F:nucleotide binding | P:cellular protein modification process | F:kinase activity	0	0	IPR001245 (PFAM) | G3DSA:3.30.200.20 (GENE3D) | G3DSA:1.10.510.10 (GENE3D) | PIRSF000654 (PIRSF) | mobidb-lite (MOBIDB_LITE) | mobidb-lite (MOBIDB_LITE) | PTHR27001 (PANTHER) | PTHR27001:SF520 (PANTHER) | IPR017441 (PROSITE_PATTERNS) | IPR000719 (PROSITE_PROFILES) | cd14066 (CDD) | IPR011009 (SUPERFAMILY)	F:GO:0005524 | F:GO:0004672 | P:GO:0006468	F:ATP binding	P:protein phosphorylation
	VvCarFPS02VCR702_v1_PsGc_1013.ver1_0.g003780.m01	VvCarFPS02VCR702_v1_PsGc_1013.ver1_0.g003780	0	ABC transporter family	0	0	0	0	PTHR19241 (PANTHER) | PTHR19241:SF304 (PANTHER) | SignalP-noTM (SIGNALP_EUK) | TMhelix (TMHMM)	no GO terms	no GO terms
	VvCarFPS02VCR702_v1_PsGc_1013.ver1_0.g003790.m01	VvCarFPS02VCR702_v1_PsGc_1013.ver1_0.g003790	0	ABC transporter G family member 28-like	F:GO:0000166 | C:GO:0016020 | F:GO:0016787	F:nucleotide binding | C:membrane | F:hydrolase activity	EC:3.6.1.3 | EC:3.6.1.15	Adenosinetriphosphatase | Nucleoside-triphosphate phosphatase	Coil (COILS) | IPR003593 (SMART) | IPR003439 (PFAM) | G3DSA:3.40.50.300 (GENE3D) | PTHR19241 (PANTHER) | PTHR19241:SF304 (PANTHER) | IPR017871 (PROSITE_PATTERNS) | IPR003439 (PROSITE_PROFILES) | cd03213 (CDD) | IPR027417 (SUPERFAMILY) | TMhelix (TMHMM) | TMhelix (TMHMM) | TMhelix (TMHMM) | TMhelix (TMHMM) | TMhelix (TMHMM)	F:GO:0016887 | F:GO:0005524	F:ATPase activity
	VvCarFPS02VCR702_v1_PsGc_1013.ver1_0.g003800.m01	VvCarFPS02VCR702_v1_PsGc_1013.ver1_0.g003800	0	arsenical pump-driving ATPase	F:GO:0000166 | F:GO:0016787	F:nucleotide binding | F:hydrolase activity	EC:3.6.1.3 | EC:3.6.1.15	Adenosinetriphosphatase | Nucleoside-triphosphate phosphatase	Coil (COILS) | G3DSA:3.40.50.300 (GENE3D) | IPR025723 (PFAM) | IPR016300 (TIGRFAM) | PTHR10803:SF16 (PANTHER) | IPR016300 (PANTHER) | IPR016300 (CDD) | SignalP-TM (SIGNALP_GRAM_POSITIVE) | IPR027417 (SUPERFAMILY)	F:GO:0016887 | F:GO:0005524	F:ATPase activity
	VvCarFPS02VCR702_v1_PsGc_1013.ver1_0.g003810.m01	VvCarFPS02VCR702_v1_PsGc_1013.ver1_0.g003810	0	DNL-type zinc finger	C:GO:0005739 | F:GO:0005488	C:mitochondrion | F:binding	0	0	IPR007853 (PFAM) | IPR024158 (PANTHER) | PTHR20922:SF13 (PANTHER) | IPR007853 (PROSITE_PROFILES)	F:GO:0008270	F:zinc ion binding
	VvCarFPS02VCR702_v1_PsGc_1013.ver1_0.g003820.m01	VvCarFPS02VCR702_v1_PsGc_1013.ver1_0.g003820	0	probable acetyltransferase NATA1-like	C:GO:0009536	C:plastid	0	0	IPR000182 (PFAM) | mobidb-lite (MOBIDB_LITE) | PTHR10545:SF29 (PANTHER) | PTHR10545 (PANTHER) | IPR000182 (PROSITE_PROFILES) | cd04301 (CDD) | IPR016181 (SUPERFAMILY)	no GO terms	no GO terms
	VvCarFPS02VCR702_v1_PsGc_1013.ver1_0.g003830.m01	VvCarFPS02VCR702_v1_PsGc_1013.ver1_0.g003830	0	lysM domain receptor-like kinase 3	F:GO:0000166 | P:GO:0006464 | F:GO:0016301 | C:GO:0005886	F:nucleotide binding | P:cellular protein modification process | F:kinase activity | C:plasma membrane	0	0	IPR000719 (PFAM) | G3DSA:1.10.510.10 (GENE3D) | G3DSA:3.30.200.20 (GENE3D) | mobidb-lite (MOBIDB_LITE) | PTHR27001 (PANTHER) | PTHR27001:SF271 (PANTHER) | IPR000719 (PROSITE_PROFILES) | IPR011009 (SUPERFAMILY)	F:GO:0005524 | F:GO:0004672 | P:GO:0006468	F:ATP binding	P:protein phosphorylation
	VvCarFPS02VCR702_v1_PsGc_1013.ver1_0.g003840.m01	VvCarFPS02VCR702_v1_PsGc_1013.ver1_0.g003840	0	probable acetyltransferase NATA1-like	C:GO:0009536	C:plastid	0	0	G3DSA:3.40.630.30 (GENE3D) | IPR000182 (PFAM) | mobidb-lite (MOBIDB_LITE) | PTHR10545 (PANTHER) | PTHR10545:SF29 (PANTHER) | IPR000182 (PROSITE_PROFILES) | cd04301 (CDD) | IPR016181 (SUPERFAMILY)	no GO terms	no GO terms
	VvCarFPS02VCR702_v1_PsGc_1013.ver1_0.g003850.m01	VvCarFPS02VCR702_v1_PsGc_1013.ver1_0.g003850	0	lysine-specific demethylase REF6	F:GO:0003676	F:nucleic acid binding	0	0	IPR013087 (SMART) | G3DSA:3.30.160.60 (GENE3D) | G3DSA:3.30.160.60 (GENE3D) | PF00096 (PFAM) | G3DSA:3.30.160.60 (GENE3D) | mobidb-lite (MOBIDB_LITE) | mobidb-lite (MOBIDB_LITE) | mobidb-lite (MOBIDB_LITE) | PTHR10694:SF45 (PANTHER) | PTHR10694 (PANTHER) | PTHR10694 (PANTHER) | IPR013087 (PROSITE_PATTERNS) | IPR013087 (PROSITE_PATTERNS) | IPR013087 (PROSITE_PATTERNS) | IPR013087 (PROSITE_PROFILES…	F:GO:0003676	F:nucleic acid binding
	VvCarFPS02VCR702_v1_PsGc_1013.ver1_0.g003860.m01	VvCarFPS02VCR702_v1_PsGc_1013.ver1_0.g003860	0	lysine-specific demethylase REF6	F:GO:0016740	F:transferase activity	0	0	IPR003347 (SMART) | IPR003349 (SMART) | IPR003347 (PFAM) | IPR003349 (PFAM) | mobidb-lite (MOBIDB_LITE) | mobidb-lite (MOBIDB_LITE) | PTHR10694 (PANTHER) | PTHR10694:SF45 (PANTHER) | IPR003347 (PROSITE_PROFILES) | IPR003349 (PROSITE_PROFILES) | SSF51197 (SUPERFAMILY)	no GO terms	no GO terms
	VvCarFPS02VCR702_v1_PsGc_1013.ver1_0.g003870.m01	VvCarFPS02VCR702_v1_PsGc_1013.ver1_0.g003870	0	Plant thionin family	0	0	0	0	SignalP-noTM (SIGNALP_EUK) | SignalP-TM (SIGNALP_GRAM_POSITIVE)	no GO terms	no GO terms
	VvCarFPS02VCR702_v1_PsGc_1013.ver1_0.g003880.m01	VvCarFPS02VCR702_v1_PsGc_1013.ver1_0.g003880	0	plastid transketolase	F:GO:0016740 | P:GO:0006139	F:transferase activity | P:nucleobase-containing compound metabolic process	EC:2.2.1.1	Transketolase	IPR005475 (SMART) | IPR033248 (PFAM) | G3DSA:3.40.50.970 (GENE3D) | IPR009014 (G3DSA:3.40.50.GENE3D) | IPR005475 (PFAM) | PTHR43522:SF5 (PANTHER) | IPR033247 (PANTHER) | cd07033 (CDD) | IPR029061 (SUPERFAMILY) | IPR009014 (SUPERFAMILY) | TMhelix (TMHMM)	F:GO:0003824 | P:GO:0008152	F:catalytic activity
	VvCarFPS02VCR702_v1_PsGc_1013.ver1_0.g003890.m01	VvCarFPS02VCR702_v1_PsGc_1013.ver1_0.g003890	0	Transketolase	0	0	0	0	G3DSA:3.40.50.970 (GENE3D) | IPR005474 (PFAM) | IPR033247 (PANTHER) | PTHR43522:SF5 (PANTHER) | cd02012 (CDD) | IPR029061 (SUPERFAMILY)	no GO terms	no GO terms
	VvCarFPS02VCR702_v1_PsGc_1013.ver1_0.g003900.m01	VvCarFPS02VCR702_v1_PsGc_1013.ver1_0.g003900	0	Adenosine kinase 2	C:GO:0005829 | P:GO:0009058 | P:GO:0044711 | F:GO:0016301 | P:GO:0006139	C:cytosol | P:biosynthetic process | P:single-organism biosynthetic process | F:kinase activity | P:nucleobase-containing compound metabolic process	EC:2.7.1.20	Adenosine kinase	IPR001805 (PRINTS) | G3DSA:3.30.1110.10 (GENE3D) | IPR011611 (PFAM) | IPR029056 (G3DSA:3.40.1190.GENE3D) | PTHR10584:SF207 (PANTHER) | PTHR10584 (PANTHER) | IPR002173 (PROSITE_PATTERNS) | cd01168 (CDD) | IPR029056 (SUPERFAMILY)	F:GO:0004001 | P:GO:0006166 | F:GO:0016773	F:adenosine kinase activity	F:phosphotransferase activity, alcohol group as acceptor
	VvCarFPS02VCR702_v1_PsGc_1013.ver1_0.g003910.m01	VvCarFPS02VCR702_v1_PsGc_1013.ver1_0.g003910	0	Adenosine kinase 2	C:GO:0005829 | P:GO:0009058 | P:GO:0044711 | F:GO:0016301 | P:GO:0006139	C:cytosol | P:biosynthetic process | P:single-organism biosynthetic process | F:kinase activity | P:nucleobase-containing compound metabolic process	EC:2.7.1.20	Adenosine kinase	IPR001805 (PRINTS) | IPR029056 (G3DSA:3.40.1190.GENE3D) | IPR011611 (PFAM) | G3DSA:3.30.1110.10 (GENE3D) | PTHR10584:SF207 (PANTHER) | PTHR10584 (PANTHER) | IPR002173 (PROSITE_PATTERNS) | cd01168 (CDD) | IPR029056 (SUPERFAMILY)	F:GO:0004001 | P:GO:0006166 | F:GO:0016773	F:adenosine kinase activity	F:phosphotransferase activity, alcohol group as acceptor
	VvCarFPS02VCR702_v1_PsGc_1013.ver1_0.g003920.m01	VvCarFPS02VCR702_v1_PsGc_1013.ver1_0.g003920	0	Phenylalanine ammonia-lyase	C:GO:0005737 | F:GO:0003824 | P:GO:0009056 | P:GO:0044763 | P:GO:0009987 | P:GO:0044712	C:cytoplasm | F:catalytic activity | P:catabolic process | P:single-organism cellular process | P:cellular process | P:single-organism catabolic process	0	0	Coil (COILS) | IPR023144 (G3DSA:1.10.274.GENE3D) | G3DSA:1.20.200.10 (GENE3D) | IPR024083 (G3DSA:1.10.275.GENE3D) | IPR005922 (TIGRFAM) | IPR001106 (PFAM) | PTHR10362:SF32 (PANTHER) | IPR001106 (PANTHER) | IPR022313 (PROSITE_PATTERNS) | IPR001106 (CDD) | IPR008948 (SUPERFAMILY)	P:GO:0006559 | C:GO:0005737 | F:GO:0003824 | F:GO:0016841	P:L-phenylalanine catabolic process	F:catalytic activity	F:ammonia-lyase activity
	VvCarFPS02VCR702_v1_PsGc_1013.ver1_0.g003930.m01	VvCarFPS02VCR702_v1_PsGc_1013.ver1_0.g003930	0	plant synaptotagmin	C:GO:0005783 | F:GO:0008289	C:endoplasmic reticulum | F:lipid binding	0	0	IPR000008 (PRINTS) | IPR000008 (SMART) | IPR035892 (G3DSA:2.60.40.GENE3D) | IPR000008 (PFAM) | IPR035892 (G3DSA:2.60.40.GENE3D) | IPR031468 (PFAM) | PTHR10774 (PANTHER) | PTHR10774:SF62 (PANTHER) | IPR000008 (PROSITE_PROFILES) | IPR000008 (PROSITE_PROFILES) | cd00030 (CDD) | SSF49562 (SUPERFAMILY) | SSF49562 (SUPERFAMILY) | TMhelix (TMHMM)	F:GO:0008289	F:lipid binding
	VvCarFPS02VCR702_v1_PsGc_1013.ver1_0.g003940.m01	VvCarFPS02VCR702_v1_PsGc_1013.ver1_0.g003940	0	Zinc finger (C3HC4-type RING finger) family	F:GO:0005488	F:binding	0	0	Coil (COILS) | IPR001841 (SMART) | IPR002035 (SMART) | IPR013083 (G3DSA:3.30.40.GENE3D) | IPR032838 (PFAM) | IPR036465 (G3DSA:3.40.50.GENE3D) | IPR001841 (PFAM) | IPR002035 (PFAM) | mobidb-lite (MOBIDB_LITE) | mobidb-lite (MOBIDB_LITE) | PTHR10579 (PANTHER) | PTHR10579:SF71 (PANTHER) | IPR001841 (PROSITE_PROFILES) | IPR002035 (PROSITE_PROFILES) | cd01466 (CDD) | cd16448 (CDD) | SignalP-noTM (SIGN…	no GO terms	no GO terms
	VvCarFPS02VCR702_v1_PsGc_1013.ver1_0.g003950.m01	VvCarFPS02VCR702_v1_PsGc_1013.ver1_0.g003950	0	BTB POZ domain-containing At1g30440-like	F:GO:0005515 | C:GO:0005739 | C:GO:0005886	F:protein binding | C:mitochondrion | C:plasma membrane	0	0	Coil (COILS) | IPR000210 (PFAM) | IPR020164 (PFAM) | G3DSA:3.30.710.10 (GENE3D) | IPR027356 (PFAM) | mobidb-lite (MOBIDB_LITE) | PTHR32370:SF46 (PANTHER) | PTHR32370 (PANTHER) | IPR000210 (PROSITE_PROFILES) | IPR027356 (PROSITE_PROFILES) | IPR011333 (SUPERFAMILY)	F:GO:0005515 | C:GO:0031966	F:protein binding
	VvCarFPS02VCR702_v1_PsGc_1013.ver1_0.g003960.m01	VvCarFPS02VCR702_v1_PsGc_1013.ver1_0.g003960	0	ribophorin 1 family	C:GO:0005737 | C:GO:0016020 | P:GO:0006464 | C:GO:0005783 | P:GO:0009058 | F:GO:0016740	C:cytoplasm | C:membrane | P:cellular protein modification process | C:endoplasmic reticulum | P:biosynthetic process | F:transferase activity	EC:2.4.1.119	Glycosyltransferases	IPR007676 (PFAM) | IPR007676 (PANTHER) | PTHR21049:SF1 (PANTHER) | SignalP-noTM (SIGNALP_EUK) | SignalP-TM (SIGNALP_GRAM_POSITIVE) | TMhelix (TMHMM)	F:GO:0004579 | C:GO:0016021 | P:GO:0006486 | C:GO:0005783	F:dolichyl-diphosphooligosaccharide-protein glycotransferase activity	P:protein glycosylation	C:endoplasmic reticulum
	VvCarFPS02VCR702_v1_PsGc_1013.ver1_0.g003970.m01	VvCarFPS02VCR702_v1_PsGc_1013.ver1_0.g003970	0	ENHANCED DISEASE RESISTANCE 2-like isoform X1	F:GO:0008289	F:lipid binding	0	0	IPR002913 (SMART) | IPR001849 (SMART) | IPR002913 (PFAM) | IPR023393 (G3DSA:3.30.530.GENE3D) | IPR009769 (PFAM) | IPR011993 (G3DSA:2.30.29.GENE3D) | IPR001849 (PFAM) | mobidb-lite (MOBIDB_LITE) | PTHR12136 (PANTHER) | PTHR12136:SF86 (PANTHER) | IPR002913 (PROSITE_PROFILES) | IPR001849 (PROSITE_PROFILES) | cd00821 (CDD) | cd00177 (CDD) | SSF55961 (SUPERFAMILY) | SSF50729 (SUPERFAMILY)	F:GO:0008289	F:lipid binding
	VvCarFPS02VCR702_v1_PsGc_1013.ver1_0.g003980.m01	VvCarFPS02VCR702_v1_PsGc_1013.ver1_0.g003980	0	GATA transcription factor 11-like	C:GO:0005634 | F:GO:0003677 | F:GO:0003700 | P:GO:0009058 | P:GO:0006139	C:nucleus | F:DNA binding | F:transcription factor activity, sequence-specific DNA binding | P:biosynthetic process | P:nucleobase-containing compound metabolic process	0	0	IPR000679 (SMART) | IPR013088 (G3DSA:3.30.50.GENE3D) | IPR000679 (PFAM) | IPR016679 (PIRSF) | mobidb-lite (MOBIDB_LITE) | mobidb-lite (MOBIDB_LITE) | PTHR10071 (PANTHER) | PTHR10071:SF194 (PANTHER) | IPR000679 (PROSITE_PATTERNS) | IPR000679 (PROSITE_PROFILES) | cd00202 (CDD) | SSF57716 (SUPERFAMILY)	C:GO:0005634 | F:GO:0003677 | F:GO:0003700 | F:GO:0008270 | P:GO:0045893 | P:GO:0006355 | F:GO:0043565	C:nucleus	F:transcription factor activity, sequence-specific DNA binding	F:zinc ion binding	P:positive regulation of transcription, DNA-templated	P:regulation of transcription, DNA-templated	F:sequence-specific DNA binding
	VvCarFPS02VCR702_v1_PsGc_1013.ver1_0.g003990.m01	VvCarFPS02VCR702_v1_PsGc_1013.ver1_0.g003990	0	auxin response factor 18-like	C:GO:0005634 | F:GO:0003677 | F:GO:0005515 | P:GO:0009719 | P:GO:0009058 | P:GO:0006139	C:nucleus | F:DNA binding | F:protein binding | P:response to endogenous stimulus | P:biosynthetic process | P:nucleobase-containing compound metabolic process	0	0	IPR003340 (SMART) | IPR003340 (PFAM) | G3DSA:3.10.20.90 (GENE3D) | G3DSA:2.30.30.1040 (GENE3D) | IPR015300 (G3DSA:2.40.330.GENE3D) | IPR010525 (PFAM) | mobidb-lite (MOBIDB_LITE) | PTHR31384 (PANTHER) | PTHR31384:SF39 (PANTHER) | IPR003340 (PROSITE_PROFILES) | IPR000270 (PROSITE_PROFILES) | IPR003340 (CDD) | IPR015300 (SUPERFAMILY)	F:GO:0003677 | C:GO:0005634 | F:GO:0005515 | P:GO:0006355 | P:GO:0009725	F:DNA binding	F:protein binding	P:regulation of transcription, DNA-templated	P:response to hormone
	VvCarFPS02VCR702_v1_PsGc_1013.ver1_0.g004000.m01	VvCarFPS02VCR702_v1_PsGc_1013.ver1_0.g004000	0	phosphoglucosamine mutase family	P:GO:0005975 | F:GO:0003824	P:carbohydrate metabolic process | F:catalytic activity	0	0	IPR005841 (PRINTS) | IPR005846 (PFAM) | G3DSA:3.40.120.10 (GENE3D) | G3DSA:3.40.120.10 (GENE3D) | IPR005844 (PFAM) | G3DSA:3.40.120.10 (GENE3D) | IPR005845 (PFAM) | PTHR42946 (PANTHER) | PTHR42946:SF1 (PANTHER) | cd03089 (CDD) | IPR016055 (SUPERFAMILY) | IPR016055 (SUPERFAMILY) | IPR016055 (SUPERFAMILY)	P:GO:0005975 | F:GO:0016868	P:carbohydrate metabolic process
	VvCarFPS02VCR702_v1_PsGc_1013.ver1_0.g004010.m01	VvCarFPS02VCR702_v1_PsGc_1013.ver1_0.g004010	0	Acyl- N-acyltransferases (NAT) superfamily	C:GO:0009536	C:plastid	0	0	G3DSA:3.40.630.30 (GENE3D) | IPR000182 (PFAM) | PTHR23091:SF208 (PANTHER) | PTHR23091 (PANTHER) | IPR000182 (PROSITE_PROFILES) | cd04301 (CDD) | SignalP-TM (SIGNALP_GRAM_POSITIVE) | IPR016181 (SUPERFAMILY)	no GO terms	no GO terms
	VvCarFPS02VCR702_v1_PsGc_1013.ver1_0.g004020.m01	VvCarFPS02VCR702_v1_PsGc_1013.ver1_0.g004020	0	Endoplasmic reticulum metallopeptidase 1	C:GO:0016020	C:membrane	0	0	no IPS match	no IPS match	no IPS match
	VvCarFPS02VCR702_v1_PsGc_1013.ver1_0.g004030.m01	VvCarFPS02VCR702_v1_PsGc_1013.ver1_0.g004030	0	endoplasmic reticulum metallopeptidase 1	C:GO:0016020	C:membrane	0	0	G3DSA:3.40.630.10 (GENE3D) | IPR007484 (PFAM) | PTHR12147:SF26 (PANTHER) | PTHR12147 (PANTHER) | PTHR12147 (PANTHER) | PTHR12147:SF26 (PANTHER) | cd03875 (CDD) | SSF53187 (SUPERFAMILY) | TMhelix (TMHMM) | TMhelix (TMHMM) | TMhelix (TMHMM) | TMhelix (TMHMM) | TMhelix (TMHMM) | TMhelix (TMHMM) | TMhelix (TMHMM)	no GO terms	no GO terms
	VvCarFPS02VCR702_v1_PsGc_1013.ver1_0.g004040.m01	VvCarFPS02VCR702_v1_PsGc_1013.ver1_0.g004040	0	CASP 5A1	C:GO:0016020	C:membrane	0	0	IPR006702 (PFAM) | PTHR32021 (PANTHER) | PTHR32021:SF16 (PANTHER) | TMhelix (TMHMM) | TMhelix (TMHMM) | TMhelix (TMHMM) | TMhelix (TMHMM)	no GO terms	no GO terms
	VvCarFPS02VCR702_v1_PsGc_1013.ver1_0.g004050.m01	VvCarFPS02VCR702_v1_PsGc_1013.ver1_0.g004050	0	homeobox-leucine zipper ATHB-14-like	C:GO:0005634 | F:GO:0003677 | F:GO:0008289	C:nucleus | F:DNA binding | F:lipid binding	0	0	Coil (COILS) | IPR002913 (SMART) | IPR001356 (SMART) | IPR013978 (PFAM) | IPR002913 (PFAM) | IPR001356 (PFAM) | IPR023393 (G3DSA:3.30.530.GENE3D) | G3DSA:1.10.10.60 (GENE3D) | mobidb-lite (MOBIDB_LITE) | PTHR24326:SF279 (PANTHER) | PTHR24326 (PANTHER) | IPR001356 (PROSITE_PROFILES) | IPR002913 (PROSITE_PROFILES) | cd14686 (CDD) | IPR001356 (CDD) | SSF55961 (SUPERFAMILY) | IPR009057 (SUPERFAMILY)	F:GO:0003677 | F:GO:0008289	F:DNA binding
	VvCarFPS02VCR702_v1_PsGc_1013.ver1_0.g004060.m01	VvCarFPS02VCR702_v1_PsGc_1013.ver1_0.g004060	0	nudix hydrolase homolog 10	F:GO:0003723 | C:GO:0005737 | F:GO:0016787	F:RNA binding | C:cytoplasm | F:hydrolase activity	0	0	IPR007722 (SMART) | IPR036189 (G3DSA:1.10.10.GENE3D) | IPR007722 (PFAM) | IPR000086 (PFAM) | G3DSA:3.90.79.10 (GENE3D) | PTHR23114:SF17 (PANTHER) | PTHR23114 (PANTHER) | IPR020084 (PROSITE_PATTERNS) | IPR000086 (PROSITE_PROFILES) | cd03672 (CDD) | IPR015797 (SUPERFAMILY) | IPR036189 (SUPERFAMILY)	F:GO:0003723 | F:GO:0030145 | F:GO:0016787	F:RNA binding	F:hydrolase activity
	VvCarFPS02VCR702_v1_PsGc_1013.ver1_0.g004070.m01	VvCarFPS02VCR702_v1_PsGc_1013.ver1_0.g004070	0	60S ribosomal L12	F:GO:0005198 | C:GO:0005829 | C:GO:0005840 | P:GO:0006412	F:structural molecule activity | C:cytosol | C:ribosome | P:translation	0	0	IPR000911 (SMART) | IPR020783 (PFAM) | IPR020784 (PFAM) | IPR036796 (G3DSA:3.30.1550.GENE3D) | IPR036769 (G3DSA:1.10.10.GENE3D) | IPR000911 (PANTHER) | PTHR11661:SF2 (PANTHER) | IPR020785 (PROSITE_PATTERNS) | IPR000911 (HAMAP) | IPR000911 (CDD) | IPR036769 (SUPERFAMILY) | IPR036796 (SUPERFAMILY)	F:GO:0003735 | C:GO:0005840 | P:GO:0006412	F:structural constituent of ribosome	P:translation
	VvCarFPS02VCR702_v1_PsGc_1013.ver1_0.g004080.m01	VvCarFPS02VCR702_v1_PsGc_1013.ver1_0.g004080	0	Aquaporin PIP2-1	C:GO:0016020 | P:GO:0006810 | F:GO:0005215	C:membrane | P:transport | F:transporter activity	0	0	IPR000425 (PRINTS) | IPR023271 (G3DSA:1.20.1080.GENE3D) | IPR000425 (TIGRFAM) | IPR000425 (PFAM) | PTHR19139:SF260 (PANTHER) | IPR034294 (PANTHER) | IPR022357 (PROSITE_PATTERNS) | IPR000425 (CDD) | IPR023271 (SUPERFAMILY) | TMhelix (TMHMM) | TMhelix (TMHMM) | TMhelix (TMHMM) | TMhelix (TMHMM) | TMhelix (TMHMM) | TMhelix (TMHMM)	F:GO:0015267 | P:GO:0055085 | C:GO:0016020	F:channel activity	C:membrane
	VvCarFPS02VCR702_v1_PsGc_1013.ver1_0.g004090.m01	VvCarFPS02VCR702_v1_PsGc_1013.ver1_0.g004090	0	casein kinase 1 2 isoform X2	0	0	0	0	PTHR37263 (PANTHER)	no GO terms	no GO terms
	VvCarFPS02VCR702_v1_PsGc_1013.ver1_0.g004100.m01	VvCarFPS02VCR702_v1_PsGc_1013.ver1_0.g004100	0	caffeoylshikimate esterase-like	C:GO:0016020	C:membrane	0	0	IPR022742 (PFAM) | IPR029058 (G3DSA:3.40.50.GENE3D) | PTHR11614 (PANTHER) | PTHR11614:SF101 (PANTHER) | IPR029058 (SUPERFAMILY)	no GO terms	no GO terms
	VvCarFPS02VCR702_v1_PsGc_1013.ver1_0.g004110.m01	VvCarFPS02VCR702_v1_PsGc_1013.ver1_0.g004110	0	WPP domain-associated -like	0	0	0	0	Coil (COILS) | Coil (COILS) | IPR037490 (PANTHER) | IPR037490 (PANTHER) | PTHR33883:SF1 (PANTHER) | IPR037490 (PANTHER) | PTHR33883:SF1 (PANTHER) | PTHR33883:SF1 (PANTHER)	no GO terms	no GO terms
	VvCarFPS02VCR702_v1_PsGc_1013.ver1_0.g004120.m01	VvCarFPS02VCR702_v1_PsGc_1013.ver1_0.g004120	0	disulfide isomerase-like 1-4	P:GO:0019725 | C:GO:0009536	P:cellular homeostasis | C:plastid	0	0	PR00421 (PRINTS) | PF13848 (PFAM) | G3DSA:3.40.30.10 (GENE3D) | G3DSA:3.40.30.10 (GENE3D) | G3DSA:3.40.30.10 (GENE3D) | IPR013766 (PFAM) | G3DSA:3.40.30.10 (GENE3D) | mobidb-lite (MOBIDB_LITE) | PTHR18929 (PANTHER) | PTHR18929 (PANTHER) | PTHR18929:SF121 (PANTHER) | IPR017937 (PROSITE_PATTERNS) | IPR013766 (PROSITE_PROFILES) | cd02981 (CDD) | cd02961 (CDD) | cd02982 (CDD) | SignalP-TM (SIGNALP_GR…	P:GO:0045454	P:cell redox homeostasis
	VvCarFPS02VCR702_v1_PsGc_1013.ver1_0.g004130.m01	VvCarFPS02VCR702_v1_PsGc_1013.ver1_0.g004130	0	V-type proton ATPase subunit G-like	C:GO:0016020 | C:GO:0005773 | P:GO:0044765 | P:GO:0006810 | F:GO:0005215 | F:GO:0016787	C:membrane | C:vacuole | P:single-organism transport | P:transport | F:transporter activity | F:hydrolase activity	EC:3.6.1.3 | EC:3.6.1.15	Adenosinetriphosphatase | Nucleoside-triphosphate phosphatase	Coil (COILS) | IPR005124 (TIGRFAM) | G3DSA:1.20.5.620 (GENE3D) | IPR005124 (PFAM) | PTHR12713:SF21 (PANTHER) | IPR005124 (PANTHER)	F:GO:0042626 | P:GO:0015992 | C:GO:0016471	F:ATPase activity, coupled to transmembrane movement of substances	C:vacuolar proton-transporting V-type ATPase complex
	VvCarFPS02VCR702_v1_PsGc_1013.ver1_0.g004140.m01	VvCarFPS02VCR702_v1_PsGc_1013.ver1_0.g004140	0	Tryptophan tyrosine permease	P:GO:0044765 | P:GO:0006810 | C:GO:0005886 | F:GO:0005215	P:single-organism transport | P:transport | C:plasma membrane | F:transporter activity	0	0	IPR018227 (PFAM) | PTHR32195:SF10 (PANTHER) | IPR013059 (PANTHER) | TMhelix (TMHMM) | TMhelix (TMHMM) | TMhelix (TMHMM) | TMhelix (TMHMM)	C:GO:0005887 | F:GO:0015173 | P:GO:0015801 | P:GO:0003333	C:integral component of plasma membrane	P:aromatic amino acid transport	P:amino acid transmembrane transport
	VvCarFPS02VCR702_v1_PsGc_1013.ver1_0.g004150.m01	VvCarFPS02VCR702_v1_PsGc_1013.ver1_0.g004150	0	Tryptophan tyrosine permease	P:GO:0044765 | P:GO:0006810 | C:GO:0005886 | F:GO:0005215	P:single-organism transport | P:transport | C:plasma membrane | F:transporter activity	0	0	IPR018227 (PFAM) | PTHR32195:SF10 (PANTHER) | IPR013059 (PANTHER) | TMhelix (TMHMM) | TMhelix (TMHMM) | TMhelix (TMHMM) | TMhelix (TMHMM)	C:GO:0005887 | F:GO:0015173 | P:GO:0015801 | P:GO:0003333	C:integral component of plasma membrane	P:aromatic amino acid transport	P:amino acid transmembrane transport
	VvCarFPS02VCR702_v1_PsGc_1013.ver1_0.g004160.m01	VvCarFPS02VCR702_v1_PsGc_1013.ver1_0.g004160	0	pentatricopeptide repeat-containing At3g02330	0	0	0	0	mobidb-lite (MOBIDB_LITE) | PTHR24015 (PANTHER) | PTHR24015:SF1043 (PANTHER)	no GO terms	no GO terms
	VvCarFPS02VCR702_v1_PsGc_1013.ver1_0.g004170.m01	VvCarFPS02VCR702_v1_PsGc_1013.ver1_0.g004170	0	patatin 6	P:GO:0008152 | F:GO:0016787	P:metabolic process | F:hydrolase activity	0	0	G3DSA:3.40.1090.10 (GENE3D) | mobidb-lite (MOBIDB_LITE) | PTHR32241 (PANTHER) | IPR016035 (SUPERFAMILY)	P:GO:0008152	P:metabolic process
	VvCarFPS02VCR702_v1_PsGc_1013.ver1_0.g004180.m01	VvCarFPS02VCR702_v1_PsGc_1013.ver1_0.g004180	0	chorismate synthase	F:GO:0003824 | P:GO:0009058 | P:GO:0044763 | P:GO:0044711 | P:GO:0009987	F:catalytic activity | P:biosynthetic process | P:single-organism cellular process | P:single-organism biosynthetic process | P:cellular process	EC:4.2.3.5	Chorismate synthase	IPR000453 (PFAM) | IPR035904 (G3DSA:3.60.150.GENE3D) | IPR000453 (PANTHER) | IPR020541 (PROSITE_PATTERNS) | IPR035904 (SUPERFAMILY)	P:GO:0009073 | F:GO:0004107	P:aromatic amino acid family biosynthetic process
	VvCarFPS02VCR702_v1_PsGc_1013.ver1_0.g004190.m01	VvCarFPS02VCR702_v1_PsGc_1013.ver1_0.g004190	0	chorismate synthase	F:GO:0003824 | P:GO:0009058 | P:GO:0044763 | P:GO:0044711 | P:GO:0009987	F:catalytic activity | P:biosynthetic process | P:single-organism cellular process | P:single-organism biosynthetic process | P:cellular process	EC:4.2.3.5	Chorismate synthase	IPR000453 (PFAM) | IPR035904 (G3DSA:3.60.150.GENE3D) | IPR000453 (PANTHER) | IPR020541 (PROSITE_PATTERNS) | IPR020541 (PROSITE_PATTERNS) | IPR035904 (SUPERFAMILY)	P:GO:0009073 | F:GO:0004107	P:aromatic amino acid family biosynthetic process
	VvCarFPS02VCR702_v1_PsGc_1013.ver1_0.g004200.m01	VvCarFPS02VCR702_v1_PsGc_1013.ver1_0.g004200	0	Para-aminobenzoate synthase	P:GO:0009058 | P:GO:0044763 | P:GO:0044711 | P:GO:0009987	P:biosynthetic process | P:single-organism cellular process | P:single-organism biosynthetic process | P:cellular process	0	0	PR00099 (PRINTS) | PR00097 (PRINTS) | PR00096 (PRINTS) | IPR006805 (PFAM) | IPR015890 (PFAM) | IPR017926 (PFAM) | IPR005802 (TIGRFAM) | IPR005801 (G3DSA:3.60.120.GENE3D) | mobidb-lite (MOBIDB_LITE) | mobidb-lite (MOBIDB_LITE) | PTHR11236 (PANTHER) | PTHR11236:SF18 (PANTHER) | IPR017926 (PROSITE_PROFILES) | cd01743 (CDD) | IPR005801 (SUPERFAMILY) | IPR029062 (SUPERFAMILY)	P:GO:0009396 | P:GO:0009058	P:folic acid-containing compound biosynthetic process
	VvCarFPS02VCR702_v1_PsGc_1013.ver1_0.g004210.m01	VvCarFPS02VCR702_v1_PsGc_1013.ver1_0.g004210	0	Para-aminobenzoate synthase	P:GO:0009058 | P:GO:0044763 | P:GO:0044711 | P:GO:0009987	P:biosynthetic process | P:single-organism cellular process | P:single-organism biosynthetic process | P:cellular process	0	0	PR00099 (PRINTS) | PR00097 (PRINTS) | PR00096 (PRINTS) | IPR017926 (PFAM) | IPR005801 (G3DSA:3.60.120.GENE3D) | IPR005802 (TIGRFAM) | IPR015890 (PFAM) | IPR006805 (PFAM) | PTHR11236 (PANTHER) | PTHR11236:SF18 (PANTHER) | IPR017926 (PROSITE_PROFILES) | cd01743 (CDD) | SignalP-noTM (SIGNALP_EUK) | IPR029062 (SUPERFAMILY) | IPR005801 (SUPERFAMILY)	P:GO:0009396 | P:GO:0009058	P:folic acid-containing compound biosynthetic process
	VvCarFPS02VCR702_v1_PsGc_1013.ver1_0.g004220.m01	VvCarFPS02VCR702_v1_PsGc_1013.ver1_0.g004220	0	myosin 2	F:GO:0005515	F:protein binding	0	0	PTHR13140 (PANTHER) | PTHR13140:SF382 (PANTHER) | IPR000048 (PROSITE_PROFILES)	F:GO:0005515	F:protein binding
	VvCarFPS02VCR702_v1_PsGc_1013.ver1_0.g004230.m01	VvCarFPS02VCR702_v1_PsGc_1013.ver1_0.g004230	0	SUPPRESSOR OF K(+) TRANSPORT GROWTH DEFECT 1	F:GO:0000166	F:nucleotide binding	0	0	IPR003959 (PFAM) | IPR015415 (PFAM) | G3DSA:1.10.8.60 (GENE3D) | G3DSA:3.40.50.300 (GENE3D) | PTHR23074 (PANTHER) | PTHR23074:SF137 (PANTHER) | IPR003960 (PROSITE_PATTERNS) | IPR027417 (SUPERFAMILY)	F:GO:0005524	F:ATP binding
	VvCarFPS02VCR702_v1_PsGc_1013.ver1_0.g004240.m01	VvCarFPS02VCR702_v1_PsGc_1013.ver1_0.g004240	0	serine threonine- kinase	F:GO:0000166 | P:GO:0006464 | F:GO:0016301	F:nucleotide binding | P:cellular protein modification process | F:kinase activity	0	0	IPR000719 (SMART) | G3DSA:1.10.510.10 (GENE3D) | IPR000719 (PFAM) | G3DSA:3.30.200.20 (GENE3D) | PIRSF000654 (PIRSF) | PTHR27006 (PANTHER) | PTHR27006:SF102 (PANTHER) | IPR008271 (PROSITE_PATTERNS) | IPR017441 (PROSITE_PATTERNS) | IPR000719 (PROSITE_PROFILES) | cd14066 (CDD) | IPR011009 (SUPERFAMILY)	F:GO:0005524 | F:GO:0004672 | P:GO:0006468	F:ATP binding	P:protein phosphorylation
	VvCarFPS02VCR702_v1_PsGc_1013.ver1_0.g004250.m01	VvCarFPS02VCR702_v1_PsGc_1013.ver1_0.g004250	0	Serine threonine- kinase	F:GO:0000166 | P:GO:0006464 | F:GO:0016301	F:nucleotide binding | P:cellular protein modification process | F:kinase activity	0	0	IPR000719 (SMART) | G3DSA:1.10.510.10 (GENE3D) | IPR000719 (PFAM) | IPR009091 (G3DSA:2.130.10.GENE3D) | G3DSA:3.30.200.20 (GENE3D) | PTHR27003 (PANTHER) | PTHR27003:SF123 (PANTHER) | IPR008271 (PROSITE_PATTERNS) | IPR017441 (PROSITE_PATTERNS) | IPR000719 (PROSITE_PROFILES) | SignalP-TM (SIGNALP_GRAM_POSITIVE) | SignalP-noTM (SIGNALP_GRAM_NEGATIVE) | SignalP-noTM (SIGNALP_EUK) | IPR011009 (SUPERFA…	F:GO:0005524 | F:GO:0004672 | P:GO:0006468	F:ATP binding	P:protein phosphorylation
	VvCarFPS02VCR702_v1_PsGc_1013.ver1_0.g004260.m01	VvCarFPS02VCR702_v1_PsGc_1013.ver1_0.g004260	0	chlorophyll a-b binding chloroplastic	P:GO:0006091 | C:GO:0016020 | P:GO:0015979 | C:GO:0009536	P:generation of precursor metabolites and energy | C:membrane | P:photosynthesis | C:plastid	0	0	IPR023329 (G3DSA:1.10.3460.GENE3D) | IPR022796 (PFAM) | IPR001344 (PANTHER) | PTHR21649:SF7 (PANTHER) | SignalP-TM (SIGNALP_GRAM_POSITIVE) | SSF103511 (SUPERFAMILY)	C:GO:0016020 | P:GO:0009765	C:membrane
	VvCarFPS02VCR702_v1_PsGc_1013.ver1_0.g004270.m01	VvCarFPS02VCR702_v1_PsGc_1013.ver1_0.g004270	0	kinase superfamily	F:GO:0000166 | P:GO:0006464 | F:GO:0016301	F:nucleotide binding | P:cellular protein modification process | F:kinase activity	0	0	IPR004147 (PFAM) | PTHR10566:SF44 (PANTHER) | PTHR10566 (PANTHER) | IPR000719 (PROSITE_PROFILES) | cd05121 (CDD) | IPR011009 (SUPERFAMILY)	F:GO:0005524 | F:GO:0004672 | P:GO:0006468	F:ATP binding	P:protein phosphorylation
	VvCarFPS02VCR702_v1_PsGc_1013.ver1_0.g004280.m01	VvCarFPS02VCR702_v1_PsGc_1013.ver1_0.g004280	0	probable E3 ubiquitin- ligase HIP1	C:GO:0016020 | P:GO:0006810	C:membrane | P:transport	0	0	SM01160 (SMART) | IPR001841 (SMART) | IPR013083 (G3DSA:3.30.40.GENE3D) | IPR001841 (PFAM) | IPR013861 (PFAM) | mobidb-lite (MOBIDB_LITE) | mobidb-lite (MOBIDB_LITE) | PTHR22937:SF74 (PANTHER) | PTHR22937 (PANTHER) | IPR001841 (PROSITE_PROFILES) | SSF57850 (SUPERFAMILY) | SSF144091 (SUPERFAMILY) | TMhelix (TMHMM) | TMhelix (TMHMM) | TMhelix (TMHMM) | TMhelix (TMHMM) | TMhelix (TMHMM) | TMhelix (TM…	P:GO:0006890 | C:GO:0016021	P:retrograde vesicle-mediated transport, Golgi to ER
	VvCarFPS02VCR702_v1_PsGc_1013.ver1_0.g004290.m01	VvCarFPS02VCR702_v1_PsGc_1013.ver1_0.g004290	0	ubiquitin-conjugating enzyme E2	C:GO:0005737	C:cytoplasm	0	0	SM00212 (SMART) | IPR000608 (PFAM) | IPR016135 (G3DSA:3.10.110.GENE3D) | mobidb-lite (MOBIDB_LITE) | PTHR44189 (PANTHER) | IPR023313 (PROSITE_PATTERNS) | IPR000608 (PROSITE_PROFILES) | IPR000608 (CDD) | IPR016135 (SUPERFAMILY)	no GO terms	no GO terms
	VvCarFPS02VCR702_v1_PsGc_1013.ver1_0.g004300.m01	VvCarFPS02VCR702_v1_PsGc_1013.ver1_0.g004300	0	Pre translocase Sec61-beta subunit	C:GO:0005737 | C:GO:0016020 | C:GO:0005783 | P:GO:0006810	C:cytoplasm | C:membrane | C:endoplasmic reticulum | P:transport	0	0	IPR030671 (PIRSF) | IPR016482 (PFAM) | mobidb-lite (MOBIDB_LITE) | IPR030671 (PANTHER) | PTHR13509:SF8 (PANTHER) | TMhelix (TMHMM)	P:GO:0006886 | C:GO:0005784	P:intracellular protein transport
	VvCarFPS02VCR702_v1_PsGc_1013.ver1_0.g004310.m01	VvCarFPS02VCR702_v1_PsGc_1013.ver1_0.g004310	0	seven transmembrane MLO family	C:GO:0016020 | P:GO:0006950	C:membrane | P:response to stress	0	0	IPR004326 (PFAM) | mobidb-lite (MOBIDB_LITE) | PTHR31942:SF34 (PANTHER) | PTHR31942:SF34 (PANTHER) | PTHR31942 (PANTHER) | PTHR31942 (PANTHER) | TMhelix (TMHMM) | TMhelix (TMHMM) | TMhelix (TMHMM) | TMhelix (TMHMM) | TMhelix (TMHMM) | TMhelix (TMHMM) | TMhelix (TMHMM)	C:GO:0016021 | P:GO:0006952	C:integral component of membrane
	VvCarFPS02VCR702_v1_PsGc_1013.ver1_0.g004320.m01	VvCarFPS02VCR702_v1_PsGc_1013.ver1_0.g004320	0	Seven transmembrane MLO family	C:GO:0016020 | P:GO:0006950	C:membrane | P:response to stress	0	0	IPR004326 (PFAM) | mobidb-lite (MOBIDB_LITE) | PTHR31942:SF34 (PANTHER) | PTHR31942 (PANTHER) | TMhelix (TMHMM) | TMhelix (TMHMM) | TMhelix (TMHMM) | TMhelix (TMHMM) | TMhelix (TMHMM) | TMhelix (TMHMM) | TMhelix (TMHMM)	C:GO:0016021 | P:GO:0006952	C:integral component of membrane
	VvCarFPS02VCR702_v1_PsGc_1013.ver1_0.g004330.m01	VvCarFPS02VCR702_v1_PsGc_1013.ver1_0.g004330	0	hypothetical protein SELMODRAFT_424121	0	0	0	0	TMhelix (TMHMM) | TMhelix (TMHMM)	no GO terms	no GO terms
	VvCarFPS02VCR702_v1_PsGc_1013.ver1_0.g004340.m01	VvCarFPS02VCR702_v1_PsGc_1013.ver1_0.g004340	0	serine carboxypeptidase-like 27	P:GO:0019538 | C:GO:0005773 | F:GO:0016787	P:protein metabolic process | C:vacuole | F:hydrolase activity	EC:3.4.21 | EC:3.4.16	Acting on peptide bonds (peptidases) | Acting on peptide bonds (peptidases)	IPR001563 (PRINTS) | IPR001563 (PFAM) | G3DSA:3.40.50.11320 (GENE3D) | IPR029058 (G3DSA:3.40.50.GENE3D) | IPR001563 (PANTHER) | PTHR11802:SF44 (PANTHER) | IPR033124 (PROSITE_PATTERNS) | IPR018202 (PROSITE_PATTERNS) | SignalP-TM (SIGNALP_GRAM_POSITIVE) | SignalP-noTM (SIGNALP_EUK) | SignalP-TM (SIGNALP_GRAM_NEGATIVE) | IPR029058 (SUPERFAMILY) | TMhelix (TMHMM)	P:GO:0006508 | F:GO:0004185	P:proteolysis
	VvCarFPS02VCR702_v1_PsGc_1013.ver1_0.g004350.m01	VvCarFPS02VCR702_v1_PsGc_1013.ver1_0.g004350	0	serine carboxypeptidase-like 27	P:GO:0019538 | C:GO:0005773 | F:GO:0016787	P:protein metabolic process | C:vacuole | F:hydrolase activity	EC:3.4.21 | EC:3.4.16	Acting on peptide bonds (peptidases) | Acting on peptide bonds (peptidases)	IPR001563 (PRINTS) | IPR029058 (G3DSA:3.40.50.GENE3D) | IPR001563 (PFAM) | G3DSA:3.40.50.11320 (GENE3D) | IPR001563 (PANTHER) | PTHR11802:SF198 (PANTHER) | IPR018202 (PROSITE_PATTERNS) | IPR033124 (PROSITE_PATTERNS) | SignalP-noTM (SIGNALP_EUK) | IPR029058 (SUPERFAMILY) | TMhelix (TMHMM)	P:GO:0006508 | F:GO:0004185	P:proteolysis
	VvCarFPS02VCR702_v1_PsGc_1013.ver1_0.g004360.m01	VvCarFPS02VCR702_v1_PsGc_1013.ver1_0.g004360	0	Myb DNA-binding domain	C:GO:0005634 | F:GO:0003677	C:nucleus | F:DNA binding	0	0	Coil (COILS) | IPR001005 (SMART) | G3DSA:1.20.58.1880 (GENE3D) | IPR001005 (PFAM) | G3DSA:1.10.10.60 (GENE3D) | mobidb-lite (MOBIDB_LITE) | mobidb-lite (MOBIDB_LITE) | mobidb-lite (MOBIDB_LITE) | mobidb-lite (MOBIDB_LITE) | mobidb-lite (MOBIDB_LITE) | mobidb-lite (MOBIDB_LITE) | mobidb-lite (MOBIDB_LITE) | PTHR13992 (PANTHER) | PTHR13992:SF7 (PANTHER) | IPR017884 (PROSITE_PROFILES) | IPR017884 (P…	F:GO:0003677	F:DNA binding
	VvCarFPS02VCR702_v1_PsGc_1013.ver1_0.g004370.m01	VvCarFPS02VCR702_v1_PsGc_1013.ver1_0.g004370	0	Pseudouridine synthase family	F:GO:0003723 | F:GO:0003824 | P:GO:0006139	F:RNA binding | F:catalytic activity | P:nucleobase-containing compound metabolic process	EC:5.4.99.12	tRNA pseudouridine(38-40) synthase	IPR006145 (PFAM) | G3DSA:3.30.2350.10 (GENE3D) | PTHR45280 (PANTHER) | IPR006224 (PROSITE_PATTERNS) | IPR006145 (CDD) | IPR002942 (CDD) | IPR020103 (SUPERFAMILY)	P:GO:0001522 | F:GO:0003723 | P:GO:0009451 | F:GO:0009982	P:pseudouridine synthesis	P:RNA modification	F:pseudouridine synthase activity
	VvCarFPS02VCR702_v1_PsGc_1013.ver1_0.g004380.m01	VvCarFPS02VCR702_v1_PsGc_1013.ver1_0.g004380	0	zinc finger B-box	C:GO:0016020	C:membrane	0	0	mobidb-lite (MOBIDB_LITE) | PTHR31033:SF12 (PANTHER) | PTHR31033 (PANTHER)	no GO terms	no GO terms
	VvCarFPS02VCR702_v1_PsGc_1013.ver1_0.g004390.m01	VvCarFPS02VCR702_v1_PsGc_1013.ver1_0.g004390	0	General transcription factor IIF subunit 2	P:GO:0009058 | P:GO:0006139 | C:GO:0005654	P:biosynthetic process | P:nucleobase-containing compound metabolic process | C:nucleoplasm	0	0	IPR036388 (G3DSA:1.10.10.GENE3D) | IPR003196 (PFAM) | mobidb-lite (MOBIDB_LITE) | IPR003196 (PANTHER) | PTHR10445:SF2 (PANTHER) | cd07980 (CDD) | IPR011039 (SUPERFAMILY) | IPR036390 (SUPERFAMILY)	P:GO:0006366 | C:GO:0005674 | P:GO:0006367	P:transcription from RNA polymerase II promoter	P:transcription initiation from RNA polymerase II promoter
	VvCarFPS02VCR702_v1_PsGc_1013.ver1_0.g004400.m01	VvCarFPS02VCR702_v1_PsGc_1013.ver1_0.g004400	0	60S acidic ribosomal P0	P:GO:0008150 | C:GO:0005840	P:biological_process | C:ribosome	0	0	PF00428 (PFAM) | IPR001790 (PFAM) | IPR030670 (PIRSF) | G3DSA:3.90.105.20 (GENE3D) | mobidb-lite (MOBIDB_LITE) | PTHR21141 (PANTHER) | PTHR21141:SF74 (PANTHER) | cd05795 (CDD) | SSF160369 (SUPERFAMILY)	P:GO:0042254 | C:GO:0005622	P:ribosome biogenesis
	VvCarFPS02VCR702_v1_PsGc_1013.ver1_0.g004410.m01	VvCarFPS02VCR702_v1_PsGc_1013.ver1_0.g004410	0	elongation factor 1-alpha	F:GO:0005515	F:protein binding	0	0	Coil (COILS) | Coil (COILS) | Coil (COILS) | Coil (COILS) | Coil (COILS) | IPR026183 (PFAM) | mobidb-lite (MOBIDB_LITE) | IPR026183 (PANTHER) | PTHR16127:SF13 (PANTHER)	F:GO:0019905	F:syntaxin binding
	VvCarFPS02VCR702_v1_PsGc_1013.ver1_0.g004420.m01	VvCarFPS02VCR702_v1_PsGc_1013.ver1_0.g004420	0	transcription factor GTE6-like isoform X1	C:GO:0005634 | F:GO:0005515 | P:GO:0009058 | P:GO:0006139	C:nucleus | F:protein binding | P:biosynthetic process | P:nucleobase-containing compound metabolic process	0	0	Coil (COILS) | Coil (COILS) | IPR001487 (PRINTS) | IPR001487 (SMART) | IPR001487 (PFAM) | IPR027353 (PFAM) | IPR036427 (G3DSA:1.20.920.GENE3D) | IPR038336 (G3DSA:1.20.1270.GENE3D) | mobidb-lite (MOBIDB_LITE) | mobidb-lite (MOBIDB_LITE) | mobidb-lite (MOBIDB_LITE) | PTHR22880 (PANTHER) | IPR017413 (PTHR22880:PANTHER) | IPR001487 (PROSITE_PROFILES) | IPR027353 (PROSITE_PROFILES) | IPR036427 (SUPERF…	C:GO:0005634 | F:GO:0005515 | P:GO:0006355	C:nucleus	P:regulation of transcription, DNA-templated
	VvCarFPS02VCR702_v1_PsGc_1013.ver1_0.g004430.m01	VvCarFPS02VCR702_v1_PsGc_1013.ver1_0.g004430	0	Bax inhibitor 1	C:GO:0005739	C:mitochondrion	0	0	IPR009724 (PFAM) | mobidb-lite (MOBIDB_LITE) | IPR009724 (PANTHER)	no GO terms	no GO terms
	VvCarFPS02VCR702_v1_PsGc_1013.ver1_0.g004440.m01	VvCarFPS02VCR702_v1_PsGc_1013.ver1_0.g004440	0	formin 14	0	0	0	0	PTHR34130:SF1 (PANTHER) | PTHR34130 (PANTHER)	no GO terms	no GO terms
	VvCarFPS02VCR702_v1_PsGc_1013.ver1_0.g004450.m01	VvCarFPS02VCR702_v1_PsGc_1013.ver1_0.g004450	0	elongation factor 1-alpha-like	F:GO:0000166 | F:GO:0008135 | C:GO:0005840 | F:GO:0016787	F:nucleotide binding | F:translation factor activity, RNA binding | C:ribosome | F:hydrolase activity	EC:3.6.1.15	Nucleoside-triphosphate phosphatase	IPR000795 (PRINTS) | G3DSA:3.40.50.300 (GENE3D) | G3DSA:2.40.30.10 (GENE3D) | IPR000795 (PFAM) | IPR004161 (PFAM) | G3DSA:2.40.30.10 (GENE3D) | IPR004160 (PFAM) | IPR004539 (TIGRFAM) | PTHR23115:SF230 (PANTHER) | PTHR23115 (PANTHER) | IPR031157 (PROSITE_PATTERNS) | IPR000795 (PROSITE_PROFILES) | IPR004539 (HAMAP) | cd03693 (CDD) | cd03705 (CDD) | cd01883 (CDD) | IPR009001 (SUPERFAMILY) | IPR02741…	F:GO:0005525 | F:GO:0003746 | C:GO:0005737 | F:GO:0003924 | P:GO:0006414	F:GTP binding	C:cytoplasm	F:GTPase activity	P:translational elongation
	VvCarFPS02VCR702_v1_PsGc_1013.ver1_0.g004460.m01	VvCarFPS02VCR702_v1_PsGc_1013.ver1_0.g004460	0	hypothetical protein PHAVU_007G092400g	0	0	0	0	PTHR34130:SF3 (PANTHER) | PTHR34130 (PANTHER)	no GO terms	no GO terms
	VvCarFPS02VCR702_v1_PsGc_1013.ver1_0.g004470.m01	VvCarFPS02VCR702_v1_PsGc_1013.ver1_0.g004470	0	formin 14	0	0	0	0	mobidb-lite (MOBIDB_LITE) | mobidb-lite (MOBIDB_LITE) | mobidb-lite (MOBIDB_LITE) | PTHR34130:SF3 (PANTHER) | PTHR34130 (PANTHER)	no GO terms	no GO terms
	VvCarFPS02VCR702_v1_PsGc_1013.ver1_0.g004480.m01	VvCarFPS02VCR702_v1_PsGc_1013.ver1_0.g004480	0	nucleolar complex 2 homolog	C:GO:0005634	C:nucleus	0	0	Coil (COILS) | IPR005343 (PFAM) | mobidb-lite (MOBIDB_LITE) | mobidb-lite (MOBIDB_LITE) | IPR005343 (PANTHER) | PTHR12687:SF8 (PANTHER)	no GO terms	no GO terms
	VvCarFPS02VCR702_v1_PsGc_1013.ver1_0.g004490.m01	VvCarFPS02VCR702_v1_PsGc_1013.ver1_0.g004490	0	IQ-DOMAIN 1-like	F:GO:0005515 | C:GO:0016020	F:protein binding | C:membrane	0	0	Coil (COILS) | IPR000048 (SMART) | IPR000048 (PFAM) | mobidb-lite (MOBIDB_LITE) | mobidb-lite (MOBIDB_LITE) | mobidb-lite (MOBIDB_LITE) | PTHR32295 (PANTHER) | PTHR32295:SF28 (PANTHER) | IPR000048 (PROSITE_PROFILES)	F:GO:0005515	F:protein binding
	VvCarFPS02VCR702_v1_PsGc_1013.ver1_0.g004500.m01	VvCarFPS02VCR702_v1_PsGc_1013.ver1_0.g004500	0	CRS1 (CRM) domain	0	0	0	0	SignalP-noTM (SIGNALP_EUK)	no GO terms	no GO terms
	VvCarFPS02VCR702_v1_PsGc_1013.ver1_0.g004510.m01	VvCarFPS02VCR702_v1_PsGc_1013.ver1_0.g004510	0	acylamino-acid-releasing enzyme 2-like	0	0	0	0	PTHR42776 (PANTHER) | PTHR42776:SF14 (PANTHER) | PTHR42776:SF14 (PANTHER) | PTHR42776 (PANTHER)	no GO terms	no GO terms
	VvCarFPS02VCR702_v1_PsGc_1013.ver1_0.g004520.m01	VvCarFPS02VCR702_v1_PsGc_1013.ver1_0.g004520	0	mitochondrial import inner membrane translocase subunit TIM14-3-like	C:GO:0016020	C:membrane	0	0	IPR001623 (SMART) | IPR036869 (G3DSA:1.10.287.GENE3D) | PTHR12763 (PANTHER) | PTHR12763:SF30 (PANTHER) | IPR001623 (PROSITE_PROFILES) | IPR001623 (CDD) | SignalP-noTM (SIGNALP_EUK) | IPR036869 (SUPERFAMILY)	no GO terms	no GO terms
	VvCarFPS02VCR702_v1_PsGc_1013.ver1_0.g004530.m01	VvCarFPS02VCR702_v1_PsGc_1013.ver1_0.g004530	0	mitochondrial substrate carrier family	F:GO:0005488 | P:GO:0006810 | C:GO:0009536	F:binding | P:transport | C:plastid	0	0	IPR002067 (PRINTS) | G3DSA:1.10.238.10 (GENE3D) | IPR023395 (G3DSA:1.50.40.GENE3D) | IPR018108 (PFAM) | mobidb-lite (MOBIDB_LITE) | PTHR24089 (PANTHER) | PTHR24089:SF300 (PANTHER) | IPR018247 (PROSITE_PATTERNS) | IPR018108 (PROSITE_PROFILES) | IPR002048 (PROSITE_PROFILES) | IPR002048 (PROSITE_PROFILES) | IPR018108 (PROSITE_PROFILES) | IPR018108 (PROSITE_PROFILES) | IPR011992 (SUPERFAMILY) | IPR02…	P:GO:0055085 | F:GO:0005509	P:transmembrane transport
	VvCarFPS02VCR702_v1_PsGc_1013.ver1_0.g004540.m01	VvCarFPS02VCR702_v1_PsGc_1013.ver1_0.g004540	0	ATP synthase subunit mitochondrial-like	C:GO:0016020 | C:GO:0005739 | P:GO:0009058 | P:GO:0044711 | P:GO:0044765 | P:GO:0006139 | P:GO:0006810 | C:GO:0009536 | F:GO:0005215 | C:GO:0009579	C:membrane | C:mitochondrion | P:biosynthetic process | P:single-organism biosynthetic process | P:single-organism transport | P:nucleobase-containing compound metabolic process | P:transport | C:plastid | F:transporter activity | C:thylakoid	0	0	Coil (COILS) | IPR036228 (G3DSA:1.20.58.GENE3D) | IPR008689 (PIRSF) | IPR008689 (PFAM) | IPR008689 (PANTHER) | PD968187 (PRODOM) | IPR036228 (SUPERFAMILY)	C:GO:0000276 | F:GO:0015078 | P:GO:0015986	C:mitochondrial proton-transporting ATP synthase complex, coupling factor F(o)	P:ATP synthesis coupled proton transport
	VvCarFPS02VCR702_v1_PsGc_1013.ver1_0.g004550.m01	VvCarFPS02VCR702_v1_PsGc_1013.ver1_0.g004550	0	dehydration-responsive element-binding 1E-like	C:GO:0005634 | F:GO:0003677 | F:GO:0003700 | P:GO:0009058 | P:GO:0006139	C:nucleus | F:DNA binding | F:transcription factor activity, sequence-specific DNA binding | P:biosynthetic process | P:nucleobase-containing compound metabolic process	0	0	IPR001471 (PRINTS) | IPR001471 (SMART) | IPR036955 (G3DSA:3.30.730.GENE3D) | IPR001471 (PFAM) | mobidb-lite (MOBIDB_LITE) | PTHR31839:SF8 (PANTHER) | PTHR31839 (PANTHER) | IPR001471 (PROSITE_PROFILES) | IPR001471 (CDD) | IPR016177 (SUPERFAMILY)	F:GO:0003677 | F:GO:0003700 | P:GO:0006355	F:DNA binding	P:regulation of transcription, DNA-templated
	VvCarFPS02VCR702_v1_PsGc_1013.ver1_0.g004560.m01	VvCarFPS02VCR702_v1_PsGc_1013.ver1_0.g004560	0	LOB domain-containing 1-like	C:GO:0005739	C:mitochondrion	0	0	Coil (COILS) | IPR004883 (PFAM) | PTHR31301:SF14 (PANTHER) | PTHR31301 (PANTHER) | IPR004883 (PROSITE_PROFILES)	no GO terms	no GO terms
	VvCarFPS02VCR702_v1_PsGc_1013.ver1_0.g004570.m01	VvCarFPS02VCR702_v1_PsGc_1013.ver1_0.g004570	0	LOB domain-containing 1-like	C:GO:0005739	C:mitochondrion	0	0	Coil (COILS) | IPR004883 (PFAM) | PTHR31301:SF14 (PANTHER) | PTHR31301 (PANTHER) | IPR004883 (PROSITE_PROFILES)	no GO terms	no GO terms
	VvCarFPS02VCR702_v1_PsGc_1013.ver1_0.g004580.m01	VvCarFPS02VCR702_v1_PsGc_1013.ver1_0.g004580	0	LOB domain-containing 1-like	C:GO:0005739	C:mitochondrion	0	0	Coil (COILS) | IPR004883 (PFAM) | PTHR31301:SF14 (PANTHER) | PTHR31301 (PANTHER) | IPR004883 (PROSITE_PROFILES)	no GO terms	no GO terms
	VvCarFPS02VCR702_v1_PsGc_1013.ver1_0.g004590.m01	VvCarFPS02VCR702_v1_PsGc_1013.ver1_0.g004590	0	LOB domain-containing 1-like	P:GO:0007275 | P:GO:0009653	P:multicellular organism development | P:anatomical structure morphogenesis	0	0	IPR004883 (PFAM) | PTHR31301:SF14 (PANTHER) | PTHR31301 (PANTHER) | IPR004883 (PROSITE_PROFILES)	no GO terms	no GO terms
	VvCarFPS02VCR702_v1_PsGc_1013.ver1_0.g004600.m01	VvCarFPS02VCR702_v1_PsGc_1013.ver1_0.g004600	0	LOB domain-containing 1-like	C:GO:0005739	C:mitochondrion	0	0	Coil (COILS) | IPR004883 (PFAM) | mobidb-lite (MOBIDB_LITE) | PTHR31301 (PANTHER) | PTHR31301:SF14 (PANTHER) | IPR004883 (PROSITE_PROFILES) | SignalP-TM (SIGNALP_GRAM_POSITIVE)	no GO terms	no GO terms
	VvCarFPS02VCR702_v1_PsGc_1013.ver1_0.g004610.m01	VvCarFPS02VCR702_v1_PsGc_1013.ver1_0.g004610	0	LOB domain-containing 1-like	C:GO:0005739	C:mitochondrion	0	0	Coil (COILS) | IPR004883 (PFAM) | PTHR31301 (PANTHER) | PTHR31301:SF14 (PANTHER) | IPR004883 (PROSITE_PROFILES)	no GO terms	no GO terms
	VvCarFPS02VCR702_v1_PsGc_1013.ver1_0.g004620.m01	VvCarFPS02VCR702_v1_PsGc_1013.ver1_0.g004620	0	LOB domain-containing 1-like	C:GO:0005739	C:mitochondrion	0	0	Coil (COILS) | IPR004883 (PFAM) | PTHR31301:SF14 (PANTHER) | PTHR31301 (PANTHER) | IPR004883 (PROSITE_PROFILES)	no GO terms	no GO terms
	VvCarFPS02VCR702_v1_PsGc_1013.ver1_0.g004630.m01	VvCarFPS02VCR702_v1_PsGc_1013.ver1_0.g004630	0	plasma-membrane choline transporter family	C:GO:0016020	C:membrane	0	0	IPR007603 (PFAM) | PTHR12385:SF76 (PANTHER) | IPR007603 (PANTHER) | IPR007603 (PANTHER) | PTHR12385:SF76 (PANTHER) | TMhelix (TMHMM) | TMhelix (TMHMM)	no GO terms	no GO terms
	VvCarFPS02VCR702_v1_PsGc_1013.ver1_0.g004640.m01	VvCarFPS02VCR702_v1_PsGc_1013.ver1_0.g004640	0	LOB domain-containing 1-like	C:GO:0005739	C:mitochondrion	0	0	IPR004883 (PFAM) | mobidb-lite (MOBIDB_LITE) | PTHR31301:SF14 (PANTHER) | PTHR31301 (PANTHER) | IPR004883 (PROSITE_PROFILES)	no GO terms	no GO terms
	VvCarFPS02VCR702_v1_PsGc_1013.ver1_0.g004650.m01	VvCarFPS02VCR702_v1_PsGc_1013.ver1_0.g004650	0	LOB domain-containing 1-like	C:GO:0005739	C:mitochondrion	0	0	Coil (COILS) | IPR004883 (PFAM) | PTHR31301 (PANTHER) | PTHR31301:SF14 (PANTHER) | IPR004883 (PROSITE_PROFILES)	no GO terms	no GO terms
	VvCarFPS02VCR702_v1_PsGc_1014.ver1_0.g004660.m01	VvCarFPS02VCR702_v1_PsGc_1014.ver1_0.g004660	0	DEAD-box ATP-dependent RNA helicase 47A	0	0	0	0	mobidb-lite (MOBIDB_LITE)	no GO terms	no GO terms
	VvCarFPS02VCR702_v1_PsGc_1014.ver1_0.g004670.m01	VvCarFPS02VCR702_v1_PsGc_1014.ver1_0.g004670	0	ribosomal S7 (chloroplast)	C:GO:0005840 | P:GO:0006412	C:ribosome | P:translation	0	0	IPR023798 (PFAM) | IPR036823 (G3DSA:1.10.455.GENE3D) | IPR000235 (PIRSF) | IPR000235 (PANTHER) | PTHR11205:SF19 (PANTHER) | IPR036823 (SUPERFAMILY)	P:GO:0006412	P:translation
	VvCarFPS02VCR702_v1_PsGc_1014.ver1_0.g004680.m01	VvCarFPS02VCR702_v1_PsGc_1014.ver1_0.g004680	0	Condensin complex subunit 1	0	0	0	0	PTHR34081 (PANTHER)	no GO terms	no GO terms
	VvCarFPS02VCR702_v1_PsGc_1014.ver1_0.g004690.m01	VvCarFPS02VCR702_v1_PsGc_1014.ver1_0.g004690	0	LRR receptor-like kinase	0	0	0	0	PTHR34081 (PANTHER)	no GO terms	no GO terms
	VvCarFPS02VCR702_v1_PsGc_1014.ver1_0.g004700.m01	VvCarFPS02VCR702_v1_PsGc_1014.ver1_0.g004700	0	LRR receptor-like kinase	0	0	0	0	IPR032675 (G3DSA:3.80.10.GENE3D) | PTHR23315:SF164 (PANTHER) | PTHR23315 (PANTHER)	no GO terms	no GO terms
	VvCarFPS02VCR702_v1_PsGc_1014.ver1_0.g004710.m01	VvCarFPS02VCR702_v1_PsGc_1014.ver1_0.g004710	0	Plant invertase pectin methylesterase inhibitor superfamily	0	0	0	0	no IPS match	no IPS match	no IPS match
	VvCarFPS02VCR702_v1_PsGc_1014.ver1_0.g004720.m01	VvCarFPS02VCR702_v1_PsGc_1014.ver1_0.g004720	0	chromosome transmission fidelity 18 homolog	0	0	0	0	mobidb-lite (MOBIDB_LITE)	no GO terms	no GO terms
	VvCarFPS02VCR702_v1_PsGc_1014.ver1_0.g004730.m01	VvCarFPS02VCR702_v1_PsGc_1014.ver1_0.g004730	0	chromosome transmission fidelity 18 homolog	F:GO:0000166	F:nucleotide binding	0	0	G3DSA:3.40.50.300 (GENE3D) | IPR003959 (PFAM) | PTHR13779 (PANTHER) | PTHR13779:SF33 (PANTHER) | PTHR13779 (PANTHER) | PTHR13779:SF33 (PANTHER) | cd00009 (CDD) | IPR027417 (SUPERFAMILY)	F:GO:0005524	F:ATP binding
	VvCarFPS02VCR702_v1_PsGc_1014.ver1_0.g004740.m01	VvCarFPS02VCR702_v1_PsGc_1014.ver1_0.g004740	0	chromosome transmission fidelity 18 homolog	F:GO:0000166	F:nucleotide binding	0	0	IPR003593 (SMART) | IPR003959 (PFAM) | G3DSA:3.40.50.300 (GENE3D) | G3DSA:1.10.8.60 (GENE3D) | PTHR23389:SF3 (PANTHER) | PTHR23389 (PANTHER) | cd00009 (CDD) | IPR027417 (SUPERFAMILY)	F:GO:0005524	F:ATP binding
	VvCarFPS02VCR702_v1_PsGc_1015.ver1_0.g004750.m01	VvCarFPS02VCR702_v1_PsGc_1015.ver1_0.g004750	0	ankyrin repeat family	C:GO:0016020	C:membrane	0	0	IPR026961 (PFAM) | PTHR24177:SF106 (PANTHER) | PTHR24177 (PANTHER) | TMhelix (TMHMM) | TMhelix (TMHMM) | TMhelix (TMHMM) | TMhelix (TMHMM)	no GO terms	no GO terms
	VvCarFPS02VCR702_v1_PsGc_1015.ver1_0.g004760.m01	VvCarFPS02VCR702_v1_PsGc_1015.ver1_0.g004760	0	methyl- -binding domain-containing 9-like	0	0	0	0	PTHR14140:SF29 (PANTHER) | PTHR14140 (PANTHER)	no GO terms	no GO terms
	VvCarFPS02VCR702_v1_PsGc_1015.ver1_0.g004770.m01	VvCarFPS02VCR702_v1_PsGc_1015.ver1_0.g004770	0	Ankyrin repeat-containing	F:GO:0005515	F:protein binding	0	0	IPR002110 (SMART) | IPR020683 (PFAM) | IPR036770 (G3DSA:1.25.40.GENE3D) | PTHR24177 (PANTHER) | PTHR24177:SF33 (PANTHER) | IPR020683 (PROSITE_PROFILES) | IPR020683 (CDD) | IPR036770 (SUPERFAMILY)	F:GO:0005515	F:protein binding
	VvCarFPS02VCR702_v1_PsGc_1015.ver1_0.g004780.m01	VvCarFPS02VCR702_v1_PsGc_1015.ver1_0.g004780	0	ankyrin repeat family	0	0	0	0	PTHR24177 (PANTHER) | PTHR24177:SF106 (PANTHER)	no GO terms	no GO terms
	VvCarFPS02VCR702_v1_PsGc_1016.ver1_0.g004790.m01	VvCarFPS02VCR702_v1_PsGc_1016.ver1_0.g004790	0	enhancer of mRNA-decapping 4-like	0	0	0	0	PTHR15598 (PANTHER) | PTHR15598:SF7 (PANTHER)	no GO terms	no GO terms
	VvCarFPS02VCR702_v1_PsGc_1016.ver1_0.g004800.m01	VvCarFPS02VCR702_v1_PsGc_1016.ver1_0.g004800	0	hemerythrin HHE cation-binding domain	F:GO:0005488	F:binding	0	0	G3DSA:1.20.120.520 (GENE3D) | IPR012312 (PFAM) | PTHR35739 (PANTHER) | cd12108 (CDD) | IPR035938 (SUPERFAMILY)	no GO terms	no GO terms
	VvCarFPS02VCR702_v1_PsGc_1016.ver1_0.g004810.m01	VvCarFPS02VCR702_v1_PsGc_1016.ver1_0.g004810	0	Ribonuclease H2 subunit A	F:GO:0003723 | F:GO:0004518	F:RNA binding | F:nuclease activity	EC:3.1.30 | EC:3.1.26 | EC:3.1.26.4	Acting on ester bonds | Acting on ester bonds | Ribonuclease H	IPR024567 (PFAM) | IPR036397 (G3DSA:3.30.420.GENE3D) | IPR001352 (PANTHER) | PTHR10954:SF7 (PANTHER) | IPR012337 (SUPERFAMILY)	F:GO:0003676 | F:GO:0004523 | F:GO:0003723	F:nucleic acid binding	F:RNA binding
	VvCarFPS02VCR702_v1_PsGc_1017.ver1_0.g004820.m01	VvCarFPS02VCR702_v1_PsGc_1017.ver1_0.g004820	0	nuclear factor subunit B1	C:GO:0005634 | F:GO:0003677 | F:GO:0005515 | P:GO:0009058 | P:GO:0006139	C:nucleus | F:DNA binding | F:protein binding | P:biosynthetic process | P:nucleobase-containing compound metabolic process	0	0	PR00615 (PRINTS) | IPR003958 (PFAM) | IPR009072 (G3DSA:1.10.20.GENE3D) | mobidb-lite (MOBIDB_LITE) | PTHR11064 (PANTHER) | PTHR11064:SF85 (PANTHER) | IPR003956 (PROSITE_PATTERNS) | IPR009072 (SUPERFAMILY)	C:GO:0005634 | F:GO:0046982 | P:GO:0006355 | F:GO:0043565	C:nucleus	P:regulation of transcription, DNA-templated	F:sequence-specific DNA binding
	VvCarFPS02VCR702_v1_PsGc_1017.ver1_0.g004830.m01	VvCarFPS02VCR702_v1_PsGc_1017.ver1_0.g004830	0	NRT1 PTR FAMILY -like	C:GO:0016020 | P:GO:0006810 | F:GO:0005215	C:membrane | P:transport | F:transporter activity	0	0	IPR000109 (PFAM) | mobidb-lite (MOBIDB_LITE) | IPR000109 (PANTHER) | PTHR11654:SF19 (PANTHER) | IPR036259 (SUPERFAMILY) | TMhelix (TMHMM) | TMhelix (TMHMM) | TMhelix (TMHMM) | TMhelix (TMHMM) | TMhelix (TMHMM) | TMhelix (TMHMM) | TMhelix (TMHMM) | TMhelix (TMHMM) | TMhelix (TMHMM)	P:GO:0055085 | F:GO:0022857 | C:GO:0016020	P:transmembrane transport	C:membrane
	VvCarFPS02VCR702_v1_PsGc_1017.ver1_0.g004840.m01	VvCarFPS02VCR702_v1_PsGc_1017.ver1_0.g004840	0	NRT1 PTR FAMILY -like	C:GO:0016020 | P:GO:0006810 | F:GO:0005215	C:membrane | P:transport | F:transporter activity	0	0	IPR000109 (PFAM) | mobidb-lite (MOBIDB_LITE) | PTHR11654:SF19 (PANTHER) | IPR000109 (PANTHER) | IPR020846 (CDD) | IPR036259 (SUPERFAMILY) | TMhelix (TMHMM) | TMhelix (TMHMM) | TMhelix (TMHMM) | TMhelix (TMHMM) | TMhelix (TMHMM) | TMhelix (TMHMM) | TMhelix (TMHMM) | TMhelix (TMHMM) | TMhelix (TMHMM) | TMhelix (TMHMM)	P:GO:0055085 | F:GO:0022857 | C:GO:0016020	P:transmembrane transport	C:membrane
	VvCarFPS02VCR702_v1_PsGc_1017.ver1_0.g004850.m01	VvCarFPS02VCR702_v1_PsGc_1017.ver1_0.g004850	0	mitogen-activated kinase 3	F:GO:0000166 | C:GO:0005737 | P:GO:0007165 | P:GO:0006464 | F:GO:0004871 | F:GO:0016301	F:nucleotide binding | C:cytoplasm | P:signal transduction | P:cellular protein modification process | F:signal transducer activity | F:kinase activity	EC:2.7.11 | EC:2.7.11.24	Transferring phosphorus-containing groups | Mitogen-activated protein kinase	IPR000719 (SMART) | G3DSA:1.10.510.10 (GENE3D) | PIRSF000654 (PIRSF) | IPR000719 (PFAM) | G3DSA:3.30.200.20 (GENE3D) | PTHR24055 (PANTHER) | PTHR24055:SF214 (PANTHER) | IPR003527 (PROSITE_PATTERNS) | IPR017441 (PROSITE_PATTERNS) | IPR008271 (PROSITE_PATTERNS) | IPR000719 (PROSITE_PROFILES) | cd07858 (CDD) | IPR011009 (SUPERFAMILY)	F:GO:0005524 | F:GO:0004707 | F:GO:0004672 | P:GO:0006468	F:ATP binding	F:protein kinase activity	P:protein phosphorylation
	VvCarFPS02VCR702_v1_PsGc_1017.ver1_0.g004860.m01	VvCarFPS02VCR702_v1_PsGc_1017.ver1_0.g004860	0	ascorbate peroxidase 1	F:GO:0003824 | P:GO:0008152 | F:GO:0005488 | P:GO:0044710 | P:GO:0006950	F:catalytic activity | P:metabolic process | F:binding | P:single-organism metabolic process | P:response to stress	EC:1.11.1.7	Peroxidase	Coil (COILS) | IPR002016 (PRINTS) | IPR002207 (PRINTS) | IPR002016 (PFAM) | G3DSA:1.10.420.10 (GENE3D) | G3DSA:1.10.520.10 (GENE3D) | mobidb-lite (MOBIDB_LITE) | PTHR31356 (PANTHER) | PTHR31356:SF17 (PANTHER) | IPR019794 (PROSITE_PATTERNS) | IPR019793 (PROSITE_PATTERNS) | IPR002016 (PROSITE_PROFILES) | cd00691 (CDD) | IPR010255 (SUPERFAMILY)	F:GO:0004601 | P:GO:0006979 | P:GO:0055114 | F:GO:0020037	F:peroxidase activity	P:oxidation-reduction process	F:heme binding
	VvCarFPS02VCR702_v1_PsGc_1017.ver1_0.g004870.m01	VvCarFPS02VCR702_v1_PsGc_1017.ver1_0.g004870	0	RNA binding (RRM RBD RNP motifs) family	F:GO:0003676 | C:GO:0005622	F:nucleic acid binding | C:intracellular	0	0	IPR003954 (SMART) | IPR000504 (PFAM) | IPR012677 (G3DSA:3.30.70.GENE3D) | mobidb-lite (MOBIDB_LITE) | mobidb-lite (MOBIDB_LITE) | PTHR12603 (PANTHER) | PTHR12603:SF6 (PANTHER) | IPR000504 (PROSITE_PROFILES) | IPR034261 (CDD) | IPR035979 (SUPERFAMILY)	F:GO:0003676	F:nucleic acid binding
	VvCarFPS02VCR702_v1_PsGc_1017.ver1_0.g004880.m01	VvCarFPS02VCR702_v1_PsGc_1017.ver1_0.g004880	0	AP2-like ethylene-responsive transcription factor	C:GO:0005634 | F:GO:0003677 | F:GO:0003700 | P:GO:0007275 | P:GO:0009058 | P:GO:0006139	C:nucleus | F:DNA binding | F:transcription factor activity, sequence-specific DNA binding | P:multicellular organism development | P:biosynthetic process | P:nucleobase-containing compound metabolic process	0	0	IPR001471 (PRINTS) | IPR001471 (SMART) | IPR036955 (G3DSA:3.30.730.GENE3D) | IPR001471 (PFAM) | mobidb-lite (MOBIDB_LITE) | mobidb-lite (MOBIDB_LITE) | mobidb-lite (MOBIDB_LITE) | IPR031112 (PANTHER) | PTHR32467:SF46 (PANTHER) | IPR001471 (PROSITE_PROFILES) | IPR001471 (PROSITE_PROFILES) | IPR001471 (CDD) | IPR001471 (CDD) | IPR016177 (SUPERFAMILY) | IPR016177 (SUPERFAMILY)	F:GO:0003677 | F:GO:0003700 | P:GO:0007275 | P:GO:0006355	F:DNA binding	P:multicellular organism development	P:regulation of transcription, DNA-templated
	VvCarFPS02VCR702_v1_PsGc_1017.ver1_0.g004890.m01	VvCarFPS02VCR702_v1_PsGc_1017.ver1_0.g004890	0	DNA repair (Rad51) family	F:GO:0000166 | C:GO:0005634 | F:GO:0003677 | P:GO:0006259 | P:GO:0006950 | F:GO:0016787	F:nucleotide binding | C:nucleus | F:DNA binding | P:DNA metabolic process | P:response to stress | F:hydrolase activity	EC:3.6.1.3 | EC:3.6.1.15	Adenosinetriphosphatase | Nucleoside-triphosphate phosphatase	G3DSA:3.40.50.300 (GENE3D) | IPR013632 (PFAM) | PTHR22942 (PANTHER) | IPR030548 (PTHR22942:PANTHER) | IPR020588 (PROSITE_PROFILES) | IPR027417 (SUPERFAMILY)	C:GO:0033063 | P:GO:0006281 | F:GO:0003677 | F:GO:0005524 | F:GO:0008094 | P:GO:0000724	C:Rad51B-Rad51C-Rad51D-XRCC2 complex	F:DNA binding	F:ATP binding	F:DNA-dependent ATPase activity	P:double-strand break repair via homologous recombination
	VvCarFPS02VCR702_v1_PsGc_1017.ver1_0.g004900.m01	VvCarFPS02VCR702_v1_PsGc_1017.ver1_0.g004900	0	DNA repair (Rad51) family	0	0	0	0	SSF47789 (SUPERFAMILY)	no GO terms	no GO terms
	VvCarFPS02VCR702_v1_PsGc_1018.ver1_0.g004910.m01	VvCarFPS02VCR702_v1_PsGc_1018.ver1_0.g004910	0	ankyrin domain	F:GO:0005515	F:protein binding	0	0	IPR002110 (SMART) | IPR036770 (G3DSA:1.25.40.GENE3D) | IPR036770 (G3DSA:1.25.40.GENE3D) | IPR020683 (PFAM) | IPR036770 (G3DSA:1.25.40.GENE3D) | PTHR24158 (PANTHER) | PTHR24158:SF42 (PANTHER) | IPR002110 (PROSITE_PROFILES) | IPR002110 (PROSITE_PROFILES) | IPR020683 (PROSITE_PROFILES) | IPR002110 (PROSITE_PROFILES) | IPR020683 (CDD) | IPR020683 (CDD) | IPR020683 (CDD) | IPR020683 (CDD) | IPR036770 …	F:GO:0005515	F:protein binding
	VvCarFPS02VCR702_v1_PsGc_1018.ver1_0.g004920.m01	VvCarFPS02VCR702_v1_PsGc_1018.ver1_0.g004920	0	ankyrin domain	F:GO:0005515	F:protein binding	0	0	IPR002110 (SMART) | IPR036770 (G3DSA:1.25.40.GENE3D) | PTHR24158 (PANTHER) | PTHR24158:SF42 (PANTHER) | IPR020683 (PROSITE_PROFILES) | IPR002110 (PROSITE_PROFILES) | IPR020683 (CDD) | IPR036770 (SUPERFAMILY)	F:GO:0005515	F:protein binding
	VvCarFPS02VCR702_v1_PsGc_1018.ver1_0.g004930.m01	VvCarFPS02VCR702_v1_PsGc_1018.ver1_0.g004930	0	galactosyltransferase family	C:GO:0005737 | C:GO:0016020 | P:GO:0006464 | C:GO:0005794 | P:GO:0009058 | F:GO:0016740	C:cytoplasm | C:membrane | P:cellular protein modification process | C:Golgi apparatus | P:biosynthetic process | F:transferase activity	0	0	IPR002659 (PFAM) | IPR025298 (PFAM) | IPR002659 (PANTHER) | PTHR11214:SF123 (PANTHER) | TMhelix (TMHMM)	C:GO:0016020 | P:GO:0006486 | F:GO:0008378	C:membrane	F:galactosyltransferase activity
	VvCarFPS02VCR702_v1_PsGc_1018.ver1_0.g004940.m01	VvCarFPS02VCR702_v1_PsGc_1018.ver1_0.g004940	0	Polyketide cyclase dehydrase and lipid transport superfamily	C:GO:0016020 | F:GO:0008289	C:membrane | F:lipid binding	0	0	IPR023393 (G3DSA:3.30.530.GENE3D) | IPR002913 (PFAM) | PTHR19308 (PANTHER) | PTHR19308:SF29 (PANTHER) | IPR002913 (PROSITE_PROFILES) | cd08870 (CDD) | SSF55961 (SUPERFAMILY) | TMhelix (TMHMM)	F:GO:0008289	F:lipid binding
	VvCarFPS02VCR702_v1_PsGc_1018.ver1_0.g004950.m01	VvCarFPS02VCR702_v1_PsGc_1018.ver1_0.g004950	0	pyruvate dehydrogenase E1 component subunit mitochondrial	F:GO:0003824 | P:GO:0008152	F:catalytic activity | P:metabolic process	0	0	G3DSA:3.40.50.970 (GENE3D) | IPR001017 (PFAM) | PTHR11516 (PANTHER) | PTHR11516:SF25 (PANTHER) | IPR029061 (SUPERFAMILY)	F:GO:0016624 | P:GO:0008152	F:oxidoreductase activity, acting on the aldehyde or oxo group of donors, disulfide as acceptor
	VvCarFPS02VCR702_v1_PsGc_1018.ver1_0.g004960.m01	VvCarFPS02VCR702_v1_PsGc_1018.ver1_0.g004960	0	Avr9 Cf-9 rapidly elicited	0	0	0	0	mobidb-lite (MOBIDB_LITE) | PTHR33641 (PANTHER) | PTHR33641:SF10 (PANTHER)	no GO terms	no GO terms
	VvCarFPS02VCR702_v1_PsGc_1018.ver1_0.g004970.m01	VvCarFPS02VCR702_v1_PsGc_1018.ver1_0.g004970	0	flavin containing monooxygenase YUCCA10	0	0	0	0	PTHR34683 (PANTHER) | PTHR34683:SF1 (PANTHER) | SignalP-noTM (SIGNALP_EUK) | SignalP-noTM (SIGNALP_GRAM_NEGATIVE) | SignalP-TM (SIGNALP_GRAM_POSITIVE)	no GO terms	no GO terms
	VvCarFPS02VCR702_v1_PsGc_1018.ver1_0.g004980.m01	VvCarFPS02VCR702_v1_PsGc_1018.ver1_0.g004980	0	granule-bound starch synthase chloroplastic amyloplastic-like	0	0	0	0	G3DSA:3.40.50.2000 (GENE3D) | IPR013534 (PFAM) | mobidb-lite (MOBIDB_LITE)	no GO terms	no GO terms
	VvCarFPS02VCR702_v1_PsGc_1018.ver1_0.g004990.m01	VvCarFPS02VCR702_v1_PsGc_1018.ver1_0.g004990	0	60S acidic ribosomal family	F:GO:0005198 | C:GO:0005829 | C:GO:0005840 | P:GO:0006412	F:structural molecule activity | C:cytosol | C:ribosome | P:translation	0	0	PF00428 (PFAM) | IPR038716 (G3DSA:1.10.10.GENE3D) | mobidb-lite (MOBIDB_LITE) | mobidb-lite (MOBIDB_LITE) | PTHR21141:SF59 (PANTHER) | PTHR21141 (PANTHER) | IPR027534 (HAMAP) | cd05831 (CDD)	F:GO:0003735 | C:GO:0005840 | P:GO:0006414 | C:GO:0005622	F:structural constituent of ribosome	P:translational elongation	C:intracellular
	VvCarFPS02VCR702_v1_PsGc_1018.ver1_0.g005000.m01	VvCarFPS02VCR702_v1_PsGc_1018.ver1_0.g005000	0	Glycosyl hydrolase superfamily	P:GO:0005975 | C:GO:0005886 | F:GO:0016787	P:carbohydrate metabolic process | C:plasma membrane | F:hydrolase activity	0	0	G3DSA:3.20.20.80 (GENE3D) | IPR000490 (PFAM) | PTHR32227:SF236 (PANTHER) | PTHR32227 (PANTHER) | IPR017853 (SUPERFAMILY) | TMhelix (TMHMM)	P:GO:0005975 | F:GO:0004553	P:carbohydrate metabolic process
	VvCarFPS02VCR702_v1_PsGc_1018.ver1_0.g005010.m01	VvCarFPS02VCR702_v1_PsGc_1018.ver1_0.g005010	0	ubiquitin carboxyl-terminal hydrolase family	P:GO:0009056 | P:GO:0006464 | F:GO:0016787	P:catabolic process | P:cellular protein modification process | F:hydrolase activity	EC:3.4.19.12	Ubiquitinyl hydrolase 1	IPR006615 (SMART) | IPR006615 (PFAM) | G3DSA:3.10.20.90 (GENE3D) | IPR001394 (PFAM) | G3DSA:3.90.70.10 (GENE3D) | G3DSA:3.30.2230.10 (GENE3D) | mobidb-lite (MOBIDB_LITE) | PTHR43913:SF3 (PANTHER) | IPR028134 (PANTHER) | IPR018200 (PROSITE_PATTERNS) | IPR018200 (PROSITE_PATTERNS) | IPR006615 (PROSITE_PROFILES) | IPR028889 (PROSITE_PROFILES) | cd02674 (CDD) | SSF54001 (SUPERFAMILY) | IPR035927 (SUP…	F:GO:0004843 | P:GO:0016579 | F:GO:0036459 | P:GO:0006511	F:thiol-dependent ubiquitin-specific protease activity	F:thiol-dependent ubiquitinyl hydrolase activity	P:ubiquitin-dependent protein catabolic process
	VvCarFPS02VCR702_v1_PsGc_1018.ver1_0.g005020.m01	VvCarFPS02VCR702_v1_PsGc_1018.ver1_0.g005020	0	RING FYVE PHD zinc finger superfamily	F:GO:0005488	F:binding	0	0	IPR001965 (SMART) | IPR013083 (G3DSA:3.30.40.GENE3D) | mobidb-lite (MOBIDB_LITE) | mobidb-lite (MOBIDB_LITE) | mobidb-lite (MOBIDB_LITE) | mobidb-lite (MOBIDB_LITE) | PTHR14571:SF9 (PANTHER) | PTHR14571 (PANTHER) | IPR019786 (PROSITE_PATTERNS) | IPR011011 (SUPERFAMILY)	no GO terms	no GO terms
	VvCarFPS02VCR702_v1_PsGc_1018.ver1_0.g005030.m01	VvCarFPS02VCR702_v1_PsGc_1018.ver1_0.g005030	0	polyadenylate-binding -interacting 12-like	F:GO:0003676	F:nucleic acid binding	0	0	IPR000504 (SMART) | IPR012677 (G3DSA:3.30.70.GENE3D) | IPR000504 (PFAM) | IPR012677 (G3DSA:3.30.70.GENE3D) | IPR009818 (PFAM) | mobidb-lite (MOBIDB_LITE) | PTHR44161:SF2 (PANTHER) | PTHR44161 (PANTHER) | IPR000504 (PROSITE_PROFILES) | IPR000504 (PROSITE_PROFILES) | IPR034823 (CDD) | IPR034825 (CDD) | IPR035979 (SUPERFAMILY) | IPR035979 (SUPERFAMILY)	F:GO:0003676	F:nucleic acid binding
	VvCarFPS02VCR702_v1_PsGc_1018.ver1_0.g005040.m01	VvCarFPS02VCR702_v1_PsGc_1018.ver1_0.g005040	0	alcohol dehydrogenase 1	F:GO:0003824 | P:GO:0008152 | F:GO:0005488 | P:GO:0044710	F:catalytic activity | P:metabolic process | F:binding | P:single-organism metabolic process	0	0	G3DSA:3.90.180.10 (GENE3D) | IPR013149 (PFAM) | IPR013154 (PFAM) | G3DSA:3.40.50.720 (GENE3D) | PTHR43880 (PANTHER) | PTHR43880:SF18 (PANTHER) | IPR002328 (PROSITE_PATTERNS) | cd08301 (CDD) | IPR011032 (SUPERFAMILY) | IPR011032 (SUPERFAMILY) | IPR036291 (SUPERFAMILY)	F:GO:0008270 | F:GO:0016491 | P:GO:0055114	F:zinc ion binding	P:oxidation-reduction process
	VvCarFPS02VCR702_v1_PsGc_1018.ver1_0.g005050.m01	VvCarFPS02VCR702_v1_PsGc_1018.ver1_0.g005050	0	DUF4228 domain	0	0	0	0	Coil (COILS) | IPR025322 (PFAM) | PTHR33148:SF11 (PANTHER) | PTHR33148 (PANTHER)	no GO terms	no GO terms
	VvCarFPS02VCR702_v1_PsGc_1018.ver1_0.g005060.m01	VvCarFPS02VCR702_v1_PsGc_1018.ver1_0.g005060	0	DUF4228 domain	0	0	0	0	IPR025322 (PFAM) | PTHR33148:SF10 (PANTHER) | PTHR33148 (PANTHER)	no GO terms	no GO terms
	VvCarFPS02VCR702_v1_PsGc_1018.ver1_0.g005070.m01	VvCarFPS02VCR702_v1_PsGc_1018.ver1_0.g005070	0	NAC domain-containing 43-like	C:GO:0005634 | F:GO:0003677 | P:GO:0009058 | P:GO:0006139	C:nucleus | F:DNA binding | P:biosynthetic process | P:nucleobase-containing compound metabolic process	0	0	IPR003441 (PFAM) | IPR036093 (G3DSA:3.30.310.GENE3D) | PTHR31989:SF39 (PANTHER) | PTHR31989 (PANTHER) | IPR003441 (PROSITE_PROFILES) | IPR036093 (SUPERFAMILY)	F:GO:0003677 | P:GO:0006355	F:DNA binding
	VvCarFPS02VCR702_v1_PsGc_1018.ver1_0.g005080.m01	VvCarFPS02VCR702_v1_PsGc_1018.ver1_0.g005080	0	glutaredoxin family	C:GO:0005623 | P:GO:0019725 | F:GO:0003824	C:cell | P:cellular homeostasis | F:catalytic activity	0	0	IPR002109 (PFAM) | G3DSA:3.40.30.10 (GENE3D) | PTHR10168 (PANTHER) | PTHR10168:SF79 (PANTHER) | IPR002109 (PROSITE_PROFILES) | cd03031 (CDD) | IPR036249 (SUPERFAMILY)	F:GO:0015035 | F:GO:0009055 | P:GO:0045454	F:protein disulfide oxidoreductase activity	P:cell redox homeostasis
	VvCarFPS02VCR702_v1_PsGc_1018.ver1_0.g005090.m01	VvCarFPS02VCR702_v1_PsGc_1018.ver1_0.g005090	0	growth-regulating factor 4-like	F:GO:0000166 | C:GO:0005634 | P:GO:0009058 | P:GO:0006139	F:nucleotide binding | C:nucleus | P:biosynthetic process | P:nucleobase-containing compound metabolic process	0	0	IPR014978 (SMART) | IPR014978 (PFAM) | IPR014977 (PFAM) | mobidb-lite (MOBIDB_LITE) | mobidb-lite (MOBIDB_LITE) | IPR031137 (PANTHER) | IPR031137 (PANTHER) | PTHR31602:SF41 (PANTHER) | PTHR31602:SF41 (PANTHER) | IPR014978 (PROSITE_PROFILES) | IPR014977 (PROSITE_PROFILES)	F:GO:0005524 | C:GO:0005634 | P:GO:0006351 | P:GO:0006355 | P:GO:0032502	F:ATP binding	P:transcription, DNA-templated	P:regulation of transcription, DNA-templated	P:developmental process
	VvCarFPS02VCR702_v1_PsGc_1018.ver1_0.g005100.m01	VvCarFPS02VCR702_v1_PsGc_1018.ver1_0.g005100	0	BRANCHLESS TRICHOME	0	0	0	0	Coil (COILS) | Coil (COILS) | mobidb-lite (MOBIDB_LITE) | mobidb-lite (MOBIDB_LITE) | PTHR31071:SF10 (PANTHER) | PTHR31071 (PANTHER)	no GO terms	no GO terms
	VvCarFPS02VCR702_v1_PsGc_1018.ver1_0.g005110.m01	VvCarFPS02VCR702_v1_PsGc_1018.ver1_0.g005110	0	Lung seven transmembrane receptor family	C:GO:0005768 | C:GO:0016020	C:endosome | C:membrane	0	0	IPR009637 (PFAM) | PTHR21229:SF22 (PANTHER) | IPR009637 (PANTHER) | SignalP-TM (SIGNALP_GRAM_POSITIVE) | SignalP-noTM (SIGNALP_GRAM_NEGATIVE) | SignalP-noTM (SIGNALP_EUK) | TMhelix (TMHMM) | TMhelix (TMHMM) | TMhelix (TMHMM) | TMhelix (TMHMM) | TMhelix (TMHMM) | TMhelix (TMHMM)	C:GO:0016021	C:integral component of membrane
	VvCarFPS02VCR702_v1_PsGc_1018.ver1_0.g005120.m01	VvCarFPS02VCR702_v1_PsGc_1018.ver1_0.g005120	0	endoglucanase 1-like	P:GO:0005975 | P:GO:0044763 | P:GO:0009987 | F:GO:0016787 | P:GO:0044723	P:carbohydrate metabolic process | P:single-organism cellular process | P:cellular process | F:hydrolase activity | P:single-organism carbohydrate metabolic process	EC:3.2.1.4	Cellulase	IPR012341 (G3DSA:1.50.10.GENE3D) | IPR012341 (G3DSA:1.50.10.GENE3D) | IPR001701 (PFAM) | PTHR22298:SF32 (PANTHER) | PTHR22298 (PANTHER) | IPR018221 (PROSITE_PATTERNS) | IPR033126 (PROSITE_PATTERNS) | PS51257 (PROSITE_PROFILES) | SignalP-noTM (SIGNALP_EUK) | IPR008928 (SUPERFAMILY) | TMhelix (TMHMM)	P:GO:0005975 | F:GO:0003824 | F:GO:0004553	P:carbohydrate metabolic process	F:hydrolase activity, hydrolyzing O-glycosyl compounds
	VvCarFPS02VCR702_v1_PsGc_1018.ver1_0.g005130.m01	VvCarFPS02VCR702_v1_PsGc_1018.ver1_0.g005130	0	beta-carotene isomerase chloroplastic	F:GO:0003824	F:catalytic activity	0	0	IPR025114 (PFAM) | PTHR33591:SF1 (PANTHER) | PTHR33591 (PANTHER)	no GO terms	no GO terms
	VvCarFPS02VCR702_v1_PsGc_1018.ver1_0.g005140.m01	VvCarFPS02VCR702_v1_PsGc_1018.ver1_0.g005140	0	GDSL-like Lipase Acylhydrolase superfamily	F:GO:0016787	F:hydrolase activity	0	0	IPR036514 (G3DSA:3.40.50.GENE3D) | IPR001087 (PFAM) | PTHR22835:SF325 (PANTHER) | PTHR22835 (PANTHER) | PTHR22835:SF325 (PANTHER) | IPR035669 (CDD) | SignalP-noTM (SIGNALP_EUK) | TMhelix (TMHMM)	F:GO:0016788	F:hydrolase activity, acting on ester bonds
	VvCarFPS02VCR702_v1_PsGc_1018.ver1_0.g005150.m01	VvCarFPS02VCR702_v1_PsGc_1018.ver1_0.g005150	0	alpha beta-Hydrolases superfamily	C:GO:0016020	C:membrane	0	0	PTHR43689 (PANTHER) | PTHR43689:SF9 (PANTHER) | TMhelix (TMHMM)	no GO terms	no GO terms
	VvCarFPS02VCR702_v1_PsGc_1018.ver1_0.g005160.m01	VvCarFPS02VCR702_v1_PsGc_1018.ver1_0.g005160	0	alpha beta-Hydrolases superfamily	C:GO:0016020	C:membrane	0	0	IPR000073 (PRINTS) | IPR000073 (PFAM) | PTHR43689:SF9 (PANTHER) | PTHR43689 (PANTHER) | IPR029058 (SUPERFAMILY)	no GO terms	no GO terms
	VvCarFPS02VCR702_v1_PsGc_1018.ver1_0.g005170.m01	VvCarFPS02VCR702_v1_PsGc_1018.ver1_0.g005170	0	basic helix-loop-helix family	F:GO:0005515 | F:GO:0003824	F:protein binding | F:catalytic activity	EC:1.3.1.74	2-alkenal reductase (NAD(P)(+))	Coil (COILS) | IPR011598 (SMART) | IPR025610 (PFAM) | IPR011598 (PFAM) | IPR036638 (G3DSA:4.10.280.GENE3D) | mobidb-lite (MOBIDB_LITE) | PTHR11514 (PANTHER) | PTHR11514:SF99 (PANTHER) | IPR011598 (PROSITE_PROFILES) | IPR011598 (CDD) | IPR036638 (SUPERFAMILY)	F:GO:0046983	F:protein dimerization activity
	VvCarFPS02VCR702_v1_PsGc_1018.ver1_0.g005180.m01	VvCarFPS02VCR702_v1_PsGc_1018.ver1_0.g005180	0	aldehyde oxidase GLOX-like	P:GO:0005975 | F:GO:0003824 | P:GO:0044723	P:carbohydrate metabolic process | F:catalytic activity | P:single-organism carbohydrate metabolic process	EC:1.1.3.9	Galactose oxidase	IPR037293 (G3DSA:2.130.10.GENE3D) | IPR013783 (G3DSA:2.60.40.GENE3D) | IPR009880 (PFAM) | IPR015202 (PFAM) | PTHR32208 (PANTHER) | PTHR32208:SF27 (PANTHER) | IPR015202 (CDD) | IPR011043 (SUPERFAMILY) | IPR014756 (SUPERFAMILY)	no GO terms	no GO terms
	VvCarFPS02VCR702_v1_PsGc_1018.ver1_0.g005190.m01	VvCarFPS02VCR702_v1_PsGc_1018.ver1_0.g005190	0	F-box family	0	0	0	0	no IPS match	no IPS match	no IPS match
	VvCarFPS02VCR702_v1_PsGc_1018.ver1_0.g005200.m01	VvCarFPS02VCR702_v1_PsGc_1018.ver1_0.g005200	0	homeobox leucine zipper family	C:GO:0005634 | F:GO:0003677 | F:GO:0003700 | P:GO:0009058 | P:GO:0006139	C:nucleus | F:DNA binding | F:transcription factor activity, sequence-specific DNA binding | P:biosynthetic process | P:nucleobase-containing compound metabolic process	0	0	Coil (COILS) | IPR001356 (SMART) | IPR001356 (PFAM) | G3DSA:1.10.10.60 (GENE3D) | IPR003106 (PFAM) | PTHR24326 (PANTHER) | PTHR24326:SF122 (PANTHER) | IPR017970 (PROSITE_PATTERNS) | IPR001356 (PROSITE_PROFILES) | IPR001356 (CDD) | IPR009057 (SUPERFAMILY)	F:GO:0003677 | F:GO:0003700 | P:GO:0006355 | F:GO:0043565	F:DNA binding	P:regulation of transcription, DNA-templated	F:sequence-specific DNA binding
	VvCarFPS02VCR702_v1_PsGc_1018.ver1_0.g005210.m01	VvCarFPS02VCR702_v1_PsGc_1018.ver1_0.g005210	0	Mediator subunit Med10	P:GO:0009058 | P:GO:0006139 | F:GO:0003674 | C:GO:0005654	P:biosynthetic process | P:nucleobase-containing compound metabolic process | F:molecular_function | C:nucleoplasm	0	0	IPR019145 (PFAM) | IPR019145 (PTHR13345:PANTHER) | PTHR13345 (PANTHER)	C:GO:0016592 | F:GO:0001104 | P:GO:0006357	C:mediator complex	P:regulation of transcription from RNA polymerase II promoter
	VvCarFPS02VCR702_v1_PsGc_1018.ver1_0.g005220.m01	VvCarFPS02VCR702_v1_PsGc_1018.ver1_0.g005220	0	cytochrome P450 78A9-like	0	0	0	0	PTHR24298:SF46 (PANTHER) | PTHR24298 (PANTHER) | TMhelix (TMHMM)	no GO terms	no GO terms
	VvCarFPS02VCR702_v1_PsGc_1018.ver1_0.g005230.m01	VvCarFPS02VCR702_v1_PsGc_1018.ver1_0.g005230	0	Cytochrome P450 78A3	F:GO:0003824 | P:GO:0008152 | F:GO:0005488 | P:GO:0044710	F:catalytic activity | P:metabolic process | F:binding | P:single-organism metabolic process	0	0	IPR002401 (PRINTS) | IPR001128 (PFAM) | IPR036396 (G3DSA:1.10.630.GENE3D) | PTHR24298 (PANTHER) | PTHR24298:SF46 (PANTHER) | IPR017972 (PROSITE_PATTERNS) | IPR036396 (SUPERFAMILY)	F:GO:0016705 | F:GO:0005506 | P:GO:0055114 | F:GO:0020037	F:oxidoreductase activity, acting on paired donors, with incorporation or reduction of molecular oxygen	P:oxidation-reduction process	F:heme binding
	VvCarFPS02VCR702_v1_PsGc_1018.ver1_0.g005240.m01	VvCarFPS02VCR702_v1_PsGc_1018.ver1_0.g005240	0	methionine gamma-lyase	F:GO:0003824 | F:GO:0005488	F:catalytic activity | F:binding	0	0	IPR000277 (PFAM) | IPR015422 (G3DSA:3.90.1150.GENE3D) | PTHR11808:SF15 (PANTHER) | IPR000277 (PANTHER) | IPR015424 (SUPERFAMILY)	F:GO:0030170 | F:GO:0003824	F:pyridoxal phosphate binding
	VvCarFPS02VCR702_v1_PsGc_1018.ver1_0.g005250.m01	VvCarFPS02VCR702_v1_PsGc_1018.ver1_0.g005250	0	embryogenesis-associated EMB8	P:GO:0009056 | P:GO:0006629 | P:GO:0044763 | P:GO:0009987 | F:GO:0016787 | P:GO:0044712	P:catabolic process | P:lipid metabolic process | P:single-organism cellular process | P:cellular process | F:hydrolase activity | P:single-organism catabolic process	EC:3.1.1.23 | EC:3.1.1.1	Acylglycerol lipase | Carboxylesterase	IPR000073 (PFAM) | IPR029058 (G3DSA:3.40.50.GENE3D) | PTHR10794 (PANTHER) | PTHR10794:SF63 (PANTHER) | IPR000952 (PROSITE_PATTERNS) | IPR029058 (SUPERFAMILY)	no GO terms	no GO terms
	VvCarFPS02VCR702_v1_PsGc_1018.ver1_0.g005260.m01	VvCarFPS02VCR702_v1_PsGc_1018.ver1_0.g005260	0	plant F25P12-18	C:GO:0005634	C:nucleus	0	0	IPR007493 (PFAM) | IPR036758 (G3DSA:2.30.240.GENE3D) | PTHR31676:SF20 (PANTHER) | IPR007493 (PANTHER) | IPR036758 (SUPERFAMILY)	no GO terms	no GO terms
	VvCarFPS02VCR702_v1_PsGc_1018.ver1_0.g005270.m01	VvCarFPS02VCR702_v1_PsGc_1018.ver1_0.g005270	0	Ypt Rab-GAP domain of gyp1p superfamily	C:GO:0016020	C:membrane	0	0	IPR000195 (SMART) | G3DSA:1.10.472.80 (GENE3D) | G3DSA:1.10.8.270 (GENE3D) | IPR000195 (PFAM) | mobidb-lite (MOBIDB_LITE) | mobidb-lite (MOBIDB_LITE) | PTHR22957 (PANTHER) | PTHR22957:SF455 (PANTHER) | IPR000195 (PROSITE_PROFILES) | IPR035969 (SUPERFAMILY) | IPR035969 (SUPERFAMILY) | TMhelix (TMHMM) | TMhelix (TMHMM)	no GO terms	no GO terms
	VvCarFPS02VCR702_v1_PsGc_1018.ver1_0.g005280.m01	VvCarFPS02VCR702_v1_PsGc_1018.ver1_0.g005280	0	Hop-interacting THI002	F:GO:0005515 | C:GO:0005829	F:protein binding | C:cytosol	0	0	PF06552 (PFAM) | IPR011990 (G3DSA:1.25.40.GENE3D) | mobidb-lite (MOBIDB_LITE) | PTHR45005 (PANTHER) | PTHR45005:SF2 (PANTHER) | IPR011990 (SUPERFAMILY) | IPR011990 (SUPERFAMILY)	F:GO:0005515	F:protein binding
	VvCarFPS02VCR702_v1_PsGc_1018.ver1_0.g005290.m01	VvCarFPS02VCR702_v1_PsGc_1018.ver1_0.g005290	0	OPT family oligopeptide transporter	C:GO:0016020 | P:GO:0006810	C:membrane | P:transport	0	0	IPR004813 (PFAM) | IPR004813 (TIGRFAM) | PTHR31645:SF11 (PANTHER) | PTHR31645 (PANTHER) | TMhelix (TMHMM) | TMhelix (TMHMM) | TMhelix (TMHMM) | TMhelix (TMHMM) | TMhelix (TMHMM) | TMhelix (TMHMM) | TMhelix (TMHMM)	P:GO:0055085	P:transmembrane transport
	VvCarFPS02VCR702_v1_PsGc_1018.ver1_0.g005300.m01	VvCarFPS02VCR702_v1_PsGc_1018.ver1_0.g005300	0	OPT family oligopeptide transporter	C:GO:0016020 | P:GO:0006810	C:membrane | P:transport	0	0	IPR004813 (TIGRFAM) | IPR004813 (PFAM) | PTHR31645 (PANTHER) | PTHR31645:SF11 (PANTHER) | PTHR31645:SF11 (PANTHER) | PTHR31645 (PANTHER) | TMhelix (TMHMM) | TMhelix (TMHMM) | TMhelix (TMHMM)	P:GO:0055085	P:transmembrane transport
	VvCarFPS02VCR702_v1_PsGc_1018.ver1_0.g005310.m01	VvCarFPS02VCR702_v1_PsGc_1018.ver1_0.g005310	0	metal-nicotianamine transporter YSL3-like	C:GO:0016020 | P:GO:0006810	C:membrane | P:transport	0	0	IPR004813 (PFAM) | PTHR31645 (PANTHER) | PTHR31645:SF11 (PANTHER) | TMhelix (TMHMM) | TMhelix (TMHMM)	P:GO:0055085	P:transmembrane transport
	VvCarFPS02VCR702_v1_PsGc_1018.ver1_0.g005320.m01	VvCarFPS02VCR702_v1_PsGc_1018.ver1_0.g005320	0	OPT family oligopeptide transporter	C:GO:0016020 | P:GO:0006810	C:membrane | P:transport	0	0	Coil (COILS) | Coil (COILS) | IPR004813 (PFAM) | IPR004813 (TIGRFAM) | mobidb-lite (MOBIDB_LITE) | PTHR31645:SF11 (PANTHER) | PTHR31645 (PANTHER) | TMhelix (TMHMM) | TMhelix (TMHMM) | TMhelix (TMHMM) | TMhelix (TMHMM) | TMhelix (TMHMM) | TMhelix (TMHMM) | TMhelix (TMHMM) | TMhelix (TMHMM) | TMhelix (TMHMM) | TMhelix (TMHMM)	P:GO:0055085	P:transmembrane transport
	VvCarFPS02VCR702_v1_PsGc_1018.ver1_0.g005330.m01	VvCarFPS02VCR702_v1_PsGc_1018.ver1_0.g005330	0	Erythronate-4-phosphate dehydrogenase family	C:GO:0016020	C:membrane	0	0	PTHR37244 (PANTHER) | TMhelix (TMHMM)	no GO terms	no GO terms
	VvCarFPS02VCR702_v1_PsGc_1018.ver1_0.g005340.m01	VvCarFPS02VCR702_v1_PsGc_1018.ver1_0.g005340	0	kinase superfamily	F:GO:0000166 | P:GO:0006464 | F:GO:0016301	F:nucleotide binding | P:cellular protein modification process | F:kinase activity	0	0	G3DSA:3.30.200.20 (GENE3D) | IPR000719 (PFAM) | G3DSA:1.10.510.10 (GENE3D) | PTHR24361:SF615 (PANTHER) | PTHR24361 (PANTHER) | IPR017441 (PROSITE_PATTERNS) | IPR000719 (PROSITE_PROFILES) | IPR011009 (SUPERFAMILY)	F:GO:0005524 | F:GO:0004672 | P:GO:0006468	F:ATP binding	P:protein phosphorylation
	VvCarFPS02VCR702_v1_PsGc_1018.ver1_0.g005350.m01	VvCarFPS02VCR702_v1_PsGc_1018.ver1_0.g005350	0	kinase superfamily	0	0	0	0	mobidb-lite (MOBIDB_LITE) | mobidb-lite (MOBIDB_LITE)	no GO terms	no GO terms
	VvCarFPS02VCR702_v1_PsGc_1018.ver1_0.g005360.m01	VvCarFPS02VCR702_v1_PsGc_1018.ver1_0.g005360	0	kinase superfamily	0	0	0	0	mobidb-lite (MOBIDB_LITE) | PTHR24361 (PANTHER) | PTHR24361:SF615 (PANTHER)	no GO terms	no GO terms
	VvCarFPS02VCR702_v1_PsGc_1018.ver1_0.g005370.m01	VvCarFPS02VCR702_v1_PsGc_1018.ver1_0.g005370	0	zinc finger matrin-type	C:GO:0016020	C:membrane	0	0	mobidb-lite (MOBIDB_LITE) | PTHR36804 (PANTHER) | TMhelix (TMHMM)	no GO terms	no GO terms
	VvCarFPS02VCR702_v1_PsGc_1018.ver1_0.g005380.m01	VvCarFPS02VCR702_v1_PsGc_1018.ver1_0.g005380	0	uncharacterized protein LOC109809273	0	0	0	0	PTHR32166:SF50 (PANTHER) | PTHR32166:SF50 (PANTHER) | PTHR32166 (PANTHER) | PTHR32166 (PANTHER)	no GO terms	no GO terms
	VvCarFPS02VCR702_v1_PsGc_1018.ver1_0.g005390.m01	VvCarFPS02VCR702_v1_PsGc_1018.ver1_0.g005390	0	heat shock	C:GO:0016020	C:membrane	0	0	Coil (COILS) | Coil (COILS) | PTHR36383 (PANTHER) | TMhelix (TMHMM) | TMhelix (TMHMM)	no GO terms	no GO terms
	VvCarFPS02VCR702_v1_PsGc_1018.ver1_0.g005400.m01	VvCarFPS02VCR702_v1_PsGc_1018.ver1_0.g005400	0	Metal-dependent hydrolase	C:GO:0005829	C:cytosol	0	0	IPR003226 (PFAM) | IPR003226 (PANTHER) | PTHR11215:SF3 (PANTHER)	no GO terms	no GO terms
	VvCarFPS02VCR702_v1_PsGc_1018.ver1_0.g005410.m01	VvCarFPS02VCR702_v1_PsGc_1018.ver1_0.g005410	0	aldolase like	C:GO:0005737 | F:GO:0003824	C:cytoplasm | F:catalytic activity	0	0	G3DSA:3.20.20.60 (GENE3D) | IPR005000 (PFAM) | mobidb-lite (MOBIDB_LITE) | mobidb-lite (MOBIDB_LITE) | PTHR30502 (PANTHER) | PTHR30502:SF0 (PANTHER) | IPR015813 (SUPERFAMILY)	F:GO:0003824	F:catalytic activity
	VvCarFPS02VCR702_v1_PsGc_1018.ver1_0.g005420.m01	VvCarFPS02VCR702_v1_PsGc_1018.ver1_0.g005420	0	Major facilitator superfamily	C:GO:0016020 | P:GO:0006810 | F:GO:0005215	C:membrane | P:transport | F:transporter activity	0	0	G3DSA:1.20.1250.20 (GENE3D) | IPR008509 (PFAM) | PTHR23516:SF12 (PANTHER) | IPR008509 (PANTHER) | IPR020846 (CDD) | SignalP-TM (SIGNALP_EUK) | IPR036259 (SUPERFAMILY) | TMhelix (TMHMM) | TMhelix (TMHMM) | TMhelix (TMHMM) | TMhelix (TMHMM) | TMhelix (TMHMM) | TMhelix (TMHMM) | TMhelix (TMHMM) | TMhelix (TMHMM) | TMhelix (TMHMM) | TMhelix (TMHMM) | TMhelix (TMHMM)	F:GO:0015098 | C:GO:0016021 | P:GO:0015689	F:molybdate ion transmembrane transporter activity	P:molybdate ion transport
	VvCarFPS02VCR702_v1_PsGc_1018.ver1_0.g005430.m01	VvCarFPS02VCR702_v1_PsGc_1018.ver1_0.g005430	0	early nodulin 1	F:GO:0003674	F:molecular_function	0	0	IPR008972 (G3DSA:2.60.40.GENE3D) | IPR003245 (PFAM) | PTHR33021 (PANTHER) | PTHR33021:SF44 (PANTHER) | IPR003245 (PRODOM) | IPR003245 (PROSITE_PROFILES) | cd11019 (CDD) | SignalP-noTM (SIGNALP_EUK) | IPR008972 (SUPERFAMILY)	F:GO:0009055	F:electron carrier activity
	VvCarFPS02VCR702_v1_PsGc_1018.ver1_0.g005440.m01	VvCarFPS02VCR702_v1_PsGc_1018.ver1_0.g005440	0	methyltransferase 1	C:GO:0005737	C:cytoplasm	0	0	IPR007757 (PFAM) | mobidb-lite (MOBIDB_LITE) | mobidb-lite (MOBIDB_LITE) | PTHR12829 (PANTHER) | PTHR12829:SF2 (PANTHER) | IPR007757 (PROSITE_PROFILES) | IPR029063 (SUPERFAMILY)	no GO terms	no GO terms
	VvCarFPS02VCR702_v1_PsGc_1018.ver1_0.g005450.m01	VvCarFPS02VCR702_v1_PsGc_1018.ver1_0.g005450	0	oligopeptide transporter 7-like	C:GO:0016020 | P:GO:0006810	C:membrane | P:transport	0	0	IPR004813 (TIGRFAM) | IPR004648 (TIGRFAM) | IPR004813 (PFAM) | mobidb-lite (MOBIDB_LITE) | PTHR22601 (PANTHER) | PTHR22601:SF12 (PANTHER) | TMhelix (TMHMM) | TMhelix (TMHMM) | TMhelix (TMHMM) | TMhelix (TMHMM) | TMhelix (TMHMM) | TMhelix (TMHMM) | TMhelix (TMHMM) | TMhelix (TMHMM) | TMhelix (TMHMM) | TMhelix (TMHMM) | TMhelix (TMHMM) | TMhelix (TMHMM) | TMhelix (TMHMM) | TMhelix (TMHMM)	P:GO:0055085	P:transmembrane transport
	VvCarFPS02VCR702_v1_PsGc_1018.ver1_0.g005460.m01	VvCarFPS02VCR702_v1_PsGc_1018.ver1_0.g005460	0	yippee-like At4g27745	F:GO:0005488	F:binding	0	0	IPR004910 (PFAM) | PTHR13848:SF36 (PANTHER) | PTHR13848 (PANTHER) | IPR034751 (PROSITE_PROFILES)	no GO terms	no GO terms
	VvCarFPS02VCR702_v1_PsGc_1018.ver1_0.g005470.m01	VvCarFPS02VCR702_v1_PsGc_1018.ver1_0.g005470	0	WNK kinase	F:GO:0000166 | P:GO:0006464 | F:GO:0016301	F:nucleotide binding | P:cellular protein modification process | F:kinase activity	0	0	IPR000719 (SMART) | G3DSA:3.10.20.90 (GENE3D) | IPR000719 (PFAM) | G3DSA:3.30.200.20 (GENE3D) | G3DSA:1.10.510.10 (GENE3D) | PTHR13902 (PANTHER) | PTHR13902:SF107 (PANTHER) | PTHR13902:SF107 (PANTHER) | IPR008271 (PROSITE_PATTERNS) | IPR000719 (PROSITE_PROFILES) | cd13983 (CDD) | IPR011009 (SUPERFAMILY)	F:GO:0005524 | F:GO:0004672 | P:GO:0006468	F:ATP binding	P:protein phosphorylation
	VvCarFPS02VCR702_v1_PsGc_1018.ver1_0.g005480.m01	VvCarFPS02VCR702_v1_PsGc_1018.ver1_0.g005480	0	uncharacterized protein LOC100500380	0	0	0	0	mobidb-lite (MOBIDB_LITE)	no GO terms	no GO terms
	VvCarFPS02VCR702_v1_PsGc_1018.ver1_0.g005490.m01	VvCarFPS02VCR702_v1_PsGc_1018.ver1_0.g005490	0	TRANSPARENT TESTA 16-like	C:GO:0005634 | F:GO:0003677 | F:GO:0003700 | F:GO:0005515 | P:GO:0009791 | P:GO:0009058 | P:GO:0006139 | P:GO:0000003	C:nucleus | F:DNA binding | F:transcription factor activity, sequence-specific DNA binding | F:protein binding | P:post-embryonic development | P:biosynthetic process | P:nucleobase-containing compound metabolic process | P:reproduction	0	0	Coil (COILS) | IPR002100 (PRINTS) | IPR002100 (SMART) | IPR002100 (PFAM) | IPR002487 (PFAM) | IPR036879 (G3DSA:3.40.1810.GENE3D) | PTHR11945 (PANTHER) | IPR031050 (PTHR11945:PANTHER) | IPR002100 (PROSITE_PATTERNS) | IPR002487 (PROSITE_PROFILES) | IPR002100 (PROSITE_PROFILES) | IPR033896 (CDD) | IPR036879 (SUPERFAMILY)	F:GO:0003677 | C:GO:0005634 | F:GO:0003700 | F:GO:0000977 | P:GO:0006355 | P:GO:0048316 | F:GO:0046983 | P:GO:0045944	F:DNA binding	F:transcription factor activity, sequence-specific DNA binding	F:RNA polymerase II regulatory region sequence-specific DNA binding	P:regulation of transcription, DNA-templated	P:seed development	F:protein dimerization activity	P:positive regulation of transcription from RNA polymerase II promoter
	VvCarFPS02VCR702_v1_PsGc_1018.ver1_0.g005500.m01	VvCarFPS02VCR702_v1_PsGc_1018.ver1_0.g005500	0	FAS-associated factor 2-B	F:GO:0005515 | C:GO:0016020	F:protein binding | C:membrane	0	0	Coil (COILS) | IPR006577 (SMART) | IPR001012 (SMART) | PF14555 (PFAM) | G3DSA:3.10.20.90 (GENE3D) | G3DSA:1.10.8.10 (GENE3D) | IPR001012 (PFAM) | G3DSA:3.40.30.10 (GENE3D) | mobidb-lite (MOBIDB_LITE) | PTHR23322:SF1 (PANTHER) | PTHR23322 (PANTHER) | IPR001012 (PROSITE_PROFILES) | cd14353 (CDD) | cd02958 (CDD) | IPR036249 (SUPERFAMILY) | IPR029071 (SUPERFAMILY) | TMhelix (TMHMM)	F:GO:0005515	F:protein binding
	VvCarFPS02VCR702_v1_PsGc_1018.ver1_0.g005510.m01	VvCarFPS02VCR702_v1_PsGc_1018.ver1_0.g005510	0	zinc finger HIT domain-containing 2 isoform X2	F:GO:0005488	F:binding	0	0	IPR007009 (PFAM) | G3DSA:3.30.60.190 (GENE3D) | IPR007529 (PFAM) | mobidb-lite (MOBIDB_LITE) | PTHR15555 (PANTHER) | IPR007529 (PROSITE_PROFILES) | SSF144232 (SUPERFAMILY)	no GO terms	no GO terms
	VvCarFPS02VCR702_v1_PsGc_1018.ver1_0.g005520.m01	VvCarFPS02VCR702_v1_PsGc_1018.ver1_0.g005520	0	aluminum-activated malate transporter 10-like	C:GO:0016020 | P:GO:0044765 | P:GO:0006810	C:membrane | P:single-organism transport | P:transport	0	0	IPR020966 (PFAM) | PTHR31086 (PANTHER) | PTHR31086:SF4 (PANTHER) | TMhelix (TMHMM) | TMhelix (TMHMM) | TMhelix (TMHMM)	P:GO:0015743	P:malate transport
	VvCarFPS02VCR702_v1_PsGc_1018.ver1_0.g005530.m01	VvCarFPS02VCR702_v1_PsGc_1018.ver1_0.g005530	0	bHLH transcription factor	F:GO:0005515 | C:GO:0005829	F:protein binding | C:cytosol	0	0	IPR025610 (PFAM) | mobidb-lite (MOBIDB_LITE) | mobidb-lite (MOBIDB_LITE) | mobidb-lite (MOBIDB_LITE) | PTHR13902:SF74 (PANTHER) | PTHR13902 (PANTHER) | IPR011598 (PROSITE_PROFILES) | IPR011598 (CDD) | IPR036638 (SUPERFAMILY)	F:GO:0046983	F:protein dimerization activity
	VvCarFPS02VCR702_v1_PsGc_1018.ver1_0.g005540.m01	VvCarFPS02VCR702_v1_PsGc_1018.ver1_0.g005540	0	hypothetical protein L484_013693	F:GO:0003676	F:nucleic acid binding	0	0	IPR006564 (SMART) | IPR007527 (PFAM) | IPR018289 (PFAM) | mobidb-lite (MOBIDB_LITE) | PTHR31973 (PANTHER) | IPR001878 (PROSITE_PROFILES) | IPR007527 (PROSITE_PROFILES)	F:GO:0003676 | F:GO:0008270	F:nucleic acid binding
	VvCarFPS02VCR702_v1_PsGc_1018.ver1_0.g005550.m01	VvCarFPS02VCR702_v1_PsGc_1018.ver1_0.g005550	0	BTB POZ domain-containing At3g05675-like	F:GO:0005515	F:protein binding	0	0	G3DSA:3.30.710.10 (GENE3D) | IPR000210 (PFAM) | PTHR31060 (PANTHER) | PTHR31060:SF8 (PANTHER) | IPR011333 (SUPERFAMILY)	F:GO:0005515	F:protein binding
	VvCarFPS02VCR702_v1_PsGc_1018.ver1_0.g005560.m01	VvCarFPS02VCR702_v1_PsGc_1018.ver1_0.g005560	0	BTB POZ domain-containing At3g05675-like	0	0	0	0	PTHR31060 (PANTHER) | PTHR31060:SF8 (PANTHER)	no GO terms	no GO terms
	VvCarFPS02VCR702_v1_PsGc_1018.ver1_0.g005570.m01	VvCarFPS02VCR702_v1_PsGc_1018.ver1_0.g005570	0	E3 ubiquitin- ligase UPL2	0	0	0	0	TMhelix (TMHMM) | TMhelix (TMHMM)	no GO terms	no GO terms
	VvCarFPS02VCR702_v1_PsGc_1018.ver1_0.g005580.m01	VvCarFPS02VCR702_v1_PsGc_1018.ver1_0.g005580	0	Dof-type zinc finger DNA-binding family	C:GO:0005634 | F:GO:0003677 | P:GO:0009058 | P:GO:0006139	C:nucleus | F:DNA binding | P:biosynthetic process | P:nucleobase-containing compound metabolic process	0	0	IPR003851 (PFAM) | mobidb-lite (MOBIDB_LITE) | mobidb-lite (MOBIDB_LITE) | PTHR31992:SF78 (PANTHER) | PTHR31992 (PANTHER) | IPR003851 (PROSITE_PATTERNS) | IPR003851 (PRODOM) | IPR003851 (PROSITE_PROFILES) | SignalP-noTM (SIGNALP_EUK)	F:GO:0003677 | P:GO:0006355	F:DNA binding
	VvCarFPS02VCR702_v1_PsGc_1018.ver1_0.g005590.m01	VvCarFPS02VCR702_v1_PsGc_1018.ver1_0.g005590	0	Transducin WD40 repeat-like superfamily	F:GO:0005515 | F:GO:0016740	F:protein binding | F:transferase activity	0	0	IPR020472 (PRINTS) | IPR001680 (SMART) | IPR015943 (G3DSA:2.130.10.GENE3D) | IPR001680 (PFAM) | IPR015943 (G3DSA:2.130.10.GENE3D) | mobidb-lite (MOBIDB_LITE) | PTHR14221:SF5 (PANTHER) | PTHR14221 (PANTHER) | IPR001680 (PROSITE_PROFILES) | IPR001680 (PROSITE_PROFILES) | IPR001680 (PROSITE_PROFILES) | IPR017986 (PROSITE_PROFILES) | IPR036322 (SUPERFAMILY)	F:GO:0005515	F:protein binding
	VvCarFPS02VCR702_v1_PsGc_1018.ver1_0.g005600.m01	VvCarFPS02VCR702_v1_PsGc_1018.ver1_0.g005600	0	anthocyanidin 3-O-glucosyltransferase-like	0	0	0	0	TMhelix (TMHMM)	no GO terms	no GO terms
	VvCarFPS02VCR702_v1_PsGc_1018.ver1_0.g005610.m01	VvCarFPS02VCR702_v1_PsGc_1018.ver1_0.g005610	0	myb-related Myb4-like	F:GO:0003677	F:DNA binding	0	0	IPR001005 (SMART) | G3DSA:1.10.10.60 (GENE3D) | IPR001005 (PFAM) | G3DSA:1.10.10.60 (GENE3D) | mobidb-lite (MOBIDB_LITE) | PTHR10641 (PANTHER) | PTHR10641:SF203 (PANTHER) | IPR017930 (PROSITE_PROFILES) | IPR017930 (PROSITE_PROFILES) | IPR001005 (CDD) | IPR001005 (CDD) | IPR009057 (SUPERFAMILY)	F:GO:0003677	F:DNA binding
	VvCarFPS02VCR702_v1_PsGc_1018.ver1_0.g005620.m01	VvCarFPS02VCR702_v1_PsGc_1018.ver1_0.g005620	0	methyltransferase mitochondrial	F:GO:0016740 | P:GO:0006412	F:transferase activity | P:translation	0	0	IPR015324 (PFAM) | G3DSA:3.40.50.150 (GENE3D) | mobidb-lite (MOBIDB_LITE) | mobidb-lite (MOBIDB_LITE) | PTHR21320 (PANTHER) | PTHR21320:SF0 (PANTHER) | IPR029063 (SUPERFAMILY)	F:GO:0008168 | P:GO:0006412	F:methyltransferase activity
	VvCarFPS02VCR702_v1_PsGc_1018.ver1_0.g005630.m01	VvCarFPS02VCR702_v1_PsGc_1018.ver1_0.g005630	0	short-chain dehydrogenase TIC chloroplastic-like	F:GO:0003824	F:catalytic activity	0	0	IPR002347 (PRINTS) | IPR002347 (PRINTS) | IPR002347 (PFAM) | G3DSA:3.40.50.720 (GENE3D) | PTHR24320 (PANTHER) | PTHR24320:SF114 (PANTHER) | cd05327 (CDD) | IPR036291 (SUPERFAMILY)	no GO terms	no GO terms
	VvCarFPS02VCR702_v1_PsGc_1018.ver1_0.g005640.m01	VvCarFPS02VCR702_v1_PsGc_1018.ver1_0.g005640	0	trehalase	P:GO:0005975 | P:GO:0044763 | P:GO:0009987 | F:GO:0016787 | P:GO:0044723	P:carbohydrate metabolic process | P:single-organism cellular process | P:cellular process | F:hydrolase activity | P:single-organism carbohydrate metabolic process	EC:3.2.1.28	Alpha,alpha-trehalase	IPR001661 (PRINTS) | IPR012341 (G3DSA:1.50.10.GENE3D) | IPR001661 (PFAM) | PTHR23403:SF1 (PANTHER) | IPR001661 (PANTHER) | IPR018232 (PROSITE_PATTERNS) | SignalP-TM (SIGNALP_GRAM_POSITIVE) | SignalP-TM (SIGNALP_EUK) | IPR008928 (SUPERFAMILY) | TMhelix (TMHMM)	F:GO:0003824 | P:GO:0005991 | F:GO:0004555	F:catalytic activity	F:alpha,alpha-trehalase activity
	VvCarFPS02VCR702_v1_PsGc_1018.ver1_0.g005650.m01	VvCarFPS02VCR702_v1_PsGc_1018.ver1_0.g005650	0	carboxyl-terminal peptidase	0	0	0	0	IPR004314 (PFAM) | IPR025521 (PFAM)	no GO terms	no GO terms
	VvCarFPS02VCR702_v1_PsGc_1018.ver1_0.g005660.m01	VvCarFPS02VCR702_v1_PsGc_1018.ver1_0.g005660	0	ABC transporter F family member 3	F:GO:0000166 | C:GO:0005829 | F:GO:0016787	F:nucleotide binding | C:cytosol | F:hydrolase activity	EC:3.6.1.3 | EC:3.6.1.15	Adenosinetriphosphatase | Nucleoside-triphosphate phosphatase	Coil (COILS) | IPR003593 (SMART) | G3DSA:3.40.50.300 (GENE3D) | IPR032781 (PFAM) | IPR003439 (PFAM) | mobidb-lite (MOBIDB_LITE) | PTHR19211:SF45 (PANTHER) | PTHR19211 (PANTHER) | IPR017871 (PROSITE_PATTERNS) | IPR017871 (PROSITE_PATTERNS) | IPR003439 (PROSITE_PROFILES) | IPR003439 (PROSITE_PROFILES) | cd03221 (CDD) | cd03221 (CDD) | IPR027417 (SUPERFAMILY) | IPR027417 (SUPERFAMILY)	F:GO:0016887 | F:GO:0005524	F:ATPase activity
	VvCarFPS02VCR702_v1_PsGc_1018.ver1_0.g005670.m01	VvCarFPS02VCR702_v1_PsGc_1018.ver1_0.g005670	0	carbon-nitrogen hydrolase family	F:GO:0000166 | C:GO:0005737 | F:GO:0003824 | P:GO:0009058 | P:GO:0044711 | P:GO:0006139	F:nucleotide binding | C:cytoplasm | F:catalytic activity | P:biosynthetic process | P:single-organism biosynthetic process | P:nucleobase-containing compound metabolic process	EC:6.3.5.1	NAD(+) synthase (glutamine-hydrolyzing)	IPR003694 (TIGRFAM) | IPR014729 (G3DSA:3.40.50.GENE3D) | IPR036526 (G3DSA:3.60.110.GENE3D) | IPR022310 (PFAM) | IPR014445 (PIRSF) | IPR003010 (PFAM) | IPR003694 (PANTHER) | PTHR23090:SF12 (PANTHER) | IPR014445 (HAMAP) | IPR003010 (PROSITE_PROFILES) | cd07570 (CDD) | IPR003694 (CDD) | IPR036526 (SUPERFAMILY) | SSF52402 (SUPERFAMILY)	F:GO:0003952 | F:GO:0005524 | P:GO:0006807 | P:GO:0009435	F:NAD+ synthase (glutamine-hydrolyzing) activity	P:nitrogen compound metabolic process	P:NAD biosynthetic process
	VvCarFPS02VCR702_v1_PsGc_1018.ver1_0.g005680.m01	VvCarFPS02VCR702_v1_PsGc_1018.ver1_0.g005680	0	luminal-binding 5	F:GO:0000166	F:nucleotide binding	0	0	Coil (COILS) | Coil (COILS) | Coil (COILS) | Coil (COILS) | IPR013126 (PRINTS) | G3DSA:3.30.420.40 (GENE3D) | IPR029047 (G3DSA:2.60.34.GENE3D) | G3DSA:3.90.640.10 (GENE3D) | IPR013126 (PFAM) | IPR029048 (G3DSA:1.20.1270.GENE3D) | G3DSA:3.30.420.40 (GENE3D) | mobidb-lite (MOBIDB_LITE) | IPR013126 (PANTHER) | PTHR19375:SF317 (PANTHER) | IPR018181 (PROSITE_PATTERNS) | IPR018181 (PROSITE_PATTERNS) | …	no GO terms	no GO terms
	VvCarFPS02VCR702_v1_PsGc_1018.ver1_0.g005690.m01	VvCarFPS02VCR702_v1_PsGc_1018.ver1_0.g005690	0	Spc97 Spc98 family of spindle pole body (SBP) component	C:GO:0005737	C:cytoplasm	0	0	no IPS match	no IPS match	no IPS match
	VvCarFPS02VCR702_v1_PsGc_1018.ver1_0.g005700.m01	VvCarFPS02VCR702_v1_PsGc_1018.ver1_0.g005700	0	beta-amylase chloroplastic	P:GO:0005975 | P:GO:0009056 | P:GO:0044763 | P:GO:0009987 | F:GO:0016787 | P:GO:0044723	P:carbohydrate metabolic process | P:catabolic process | P:single-organism cellular process | P:cellular process | F:hydrolase activity | P:single-organism carbohydrate metabolic process	EC:3.2.1.2	Beta-amylase	IPR001554 (PRINTS) | G3DSA:3.20.20.80 (GENE3D) | IPR001554 (PFAM) | PTHR31352:SF7 (PANTHER) | IPR001554 (PANTHER) | IPR017853 (SUPERFAMILY)	P:GO:0000272 | F:GO:0016161	P:polysaccharide catabolic process
	VvCarFPS02VCR702_v1_PsGc_1018.ver1_0.g005710.m01	VvCarFPS02VCR702_v1_PsGc_1018.ver1_0.g005710	0	beta-amylase chloroplastic-like	P:GO:0005975 | P:GO:0009056 | P:GO:0044763 | P:GO:0009987 | F:GO:0016787 | P:GO:0044723	P:carbohydrate metabolic process | P:catabolic process | P:single-organism cellular process | P:cellular process | F:hydrolase activity | P:single-organism carbohydrate metabolic process	EC:3.2.1.2	Beta-amylase	IPR001554 (PRINTS) | IPR001554 (PFAM) | G3DSA:3.20.20.80 (GENE3D) | PTHR31352:SF7 (PANTHER) | IPR001554 (PANTHER) | IPR017853 (SUPERFAMILY)	P:GO:0000272 | F:GO:0016161	P:polysaccharide catabolic process
	VvCarFPS02VCR702_v1_PsGc_1018.ver1_0.g005720.m01	VvCarFPS02VCR702_v1_PsGc_1018.ver1_0.g005720	0	proline-rich family	0	0	0	0	mobidb-lite (MOBIDB_LITE) | PTHR34467:SF1 (PANTHER) | PTHR34467 (PANTHER) | PS51257 (PROSITE_PROFILES) | SignalP-noTM (SIGNALP_GRAM_NEGATIVE) | SignalP-noTM (SIGNALP_EUK) | SignalP-TM (SIGNALP_GRAM_POSITIVE) | TMhelix (TMHMM)	no GO terms	no GO terms
	VvCarFPS02VCR702_v1_PsGc_1018.ver1_0.g005730.m01	VvCarFPS02VCR702_v1_PsGc_1018.ver1_0.g005730	0	B3 domain-containing At2g33720-like	F:GO:0003677	F:DNA binding	0	0	Coil (COILS) | IPR015300 (G3DSA:2.40.330.GENE3D) | mobidb-lite (MOBIDB_LITE) | PTHR34269 (PANTHER) | IPR003340 (CDD) | IPR015300 (SUPERFAMILY)	F:GO:0003677	F:DNA binding
	VvCarFPS02VCR702_v1_PsGc_1018.ver1_0.g005740.m01	VvCarFPS02VCR702_v1_PsGc_1018.ver1_0.g005740	0	kinesin light chain	F:GO:0005515 | C:GO:0005737	F:protein binding | C:cytoplasm	0	0	Coil (COILS) | Coil (COILS) | IPR019734 (SMART) | IPR011990 (G3DSA:1.25.40.GENE3D) | IPR011990 (G3DSA:1.25.40.GENE3D) | PF13424 (PFAM) | IPR011990 (G3DSA:1.25.40.GENE3D) | mobidb-lite (MOBIDB_LITE) | PTHR19959:SF202 (PANTHER) | PTHR19959 (PANTHER) | IPR019734 (PROSITE_PROFILES) | IPR019734 (PROSITE_PROFILES) | IPR019734 (PROSITE_PROFILES) | IPR019734 (PROSITE_PROFILES) | IPR019734 (PROSITE_PROFIL…	F:GO:0005515	F:protein binding
	VvCarFPS02VCR702_v1_PsGc_1018.ver1_0.g005750.m01	VvCarFPS02VCR702_v1_PsGc_1018.ver1_0.g005750	0	bidirectional sugar transporter SWEET6b-like	C:GO:0016020	C:membrane	0	0	IPR004316 (PFAM) | G3DSA:1.20.1280.290 (GENE3D) | PTHR10791 (PANTHER) | PTHR10791:SF105 (PANTHER) | TMhelix (TMHMM) | TMhelix (TMHMM) | TMhelix (TMHMM) | TMhelix (TMHMM) | TMhelix (TMHMM) | TMhelix (TMHMM)	C:GO:0016021	C:integral component of membrane
	VvCarFPS02VCR702_v1_PsGc_1018.ver1_0.g005760.m01	VvCarFPS02VCR702_v1_PsGc_1018.ver1_0.g005760	0	bidirectional sugar transporter SWEET4-like	0	0	0	0	TMhelix (TMHMM)	no GO terms	no GO terms
	VvCarFPS02VCR702_v1_PsGc_1018.ver1_0.g005770.m01	VvCarFPS02VCR702_v1_PsGc_1018.ver1_0.g005770	0	plant regulator RWP-RK family	C:GO:0005634 | F:GO:0005515	C:nucleus | F:protein binding	0	0	IPR000270 (SMART) | IPR000270 (PFAM) | G3DSA:3.10.20.90 (GENE3D) | IPR003035 (PFAM) | mobidb-lite (MOBIDB_LITE) | mobidb-lite (MOBIDB_LITE) | PTHR32002 (PANTHER) | PTHR32002:SF4 (PANTHER) | IPR003035 (PROSITE_PROFILES) | IPR000270 (PROSITE_PROFILES) | IPR034891 (CDD) | SSF54277 (SUPERFAMILY)	F:GO:0005515	F:protein binding
	VvCarFPS02VCR702_v1_PsGc_1018.ver1_0.g005780.m01	VvCarFPS02VCR702_v1_PsGc_1018.ver1_0.g005780	0	Plant regulator RWP-RK family	0	0	0	0	IPR009653 (PFAM) | PTHR32002:SF4 (PANTHER) | PTHR32002:SF4 (PANTHER) | PTHR32002 (PANTHER) | PTHR32002 (PANTHER)	no GO terms	no GO terms
	VvCarFPS02VCR702_v1_PsGc_1018.ver1_0.g005790.m01	VvCarFPS02VCR702_v1_PsGc_1018.ver1_0.g005790	0	DUF2439 family	0	0	0	0	IPR018838 (PFAM)	no GO terms	no GO terms
	VvCarFPS02VCR702_v1_PsGc_1018.ver1_0.g005800.m01	VvCarFPS02VCR702_v1_PsGc_1018.ver1_0.g005800	0	hypothetical protein SELMODRAFT_176439	0	0	0	0	mobidb-lite (MOBIDB_LITE) | mobidb-lite (MOBIDB_LITE) | mobidb-lite (MOBIDB_LITE)	no GO terms	no GO terms
	VvCarFPS02VCR702_v1_PsGc_1018.ver1_0.g005810.m01	VvCarFPS02VCR702_v1_PsGc_1018.ver1_0.g005810	0	ABL interactor 3	C:GO:0005737	C:cytoplasm	0	0	mobidb-lite (MOBIDB_LITE) | IPR028457 (PANTHER) | PTHR10460:SF10 (PANTHER)	no GO terms	no GO terms
	VvCarFPS02VCR702_v1_PsGc_1018.ver1_0.g005820.m01	VvCarFPS02VCR702_v1_PsGc_1018.ver1_0.g005820	0	26S proteasome non-ATPase regulatory subunit 8 homolog A-like	P:GO:0019538 | C:GO:0005829	P:protein metabolic process | C:cytosol	0	0	G3DSA:1.25.40.990 (GENE3D) | IPR033464 (PFAM) | IPR006746 (PANTHER)	C:GO:0005838 | P:GO:0006508	C:proteasome regulatory particle
	VvCarFPS02VCR702_v1_PsGc_1018.ver1_0.g005830.m01	VvCarFPS02VCR702_v1_PsGc_1018.ver1_0.g005830	0	30S ribosomal S6 chloroplastic	F:GO:0003723 | F:GO:0005198 | C:GO:0005840 | P:GO:0006412	F:RNA binding | F:structural molecule activity | C:ribosome | P:translation	0	0	IPR014717 (G3DSA:3.30.70.GENE3D) | IPR000529 (PFAM) | mobidb-lite (MOBIDB_LITE) | mobidb-lite (MOBIDB_LITE) | PTHR21011:SF7 (PANTHER) | IPR000529 (PANTHER) | IPR020814 (HAMAP) | cd15487 (CDD) | IPR035980 (SUPERFAMILY)	F:GO:0003735 | C:GO:0005840 | F:GO:0019843 | P:GO:0006412	F:structural constituent of ribosome	F:rRNA binding	P:translation
	VvCarFPS02VCR702_v1_PsGc_1018.ver1_0.g005840.m01	VvCarFPS02VCR702_v1_PsGc_1018.ver1_0.g005840	0	RING U-box superfamily	C:GO:0016020	C:membrane	0	0	IPR001841 (SMART) | IPR013083 (G3DSA:3.30.40.GENE3D) | IPR001841 (PFAM) | mobidb-lite (MOBIDB_LITE) | PTHR22765:SF50 (PANTHER) | PTHR22765 (PANTHER) | IPR001841 (PROSITE_PROFILES) | SSF57850 (SUPERFAMILY) | TMhelix (TMHMM)	no GO terms	no GO terms
	VvCarFPS02VCR702_v1_PsGc_1018.ver1_0.g005850.m01	VvCarFPS02VCR702_v1_PsGc_1018.ver1_0.g005850	0	cellulose synthase G3	P:GO:0005975 | C:GO:0016020 | C:GO:0005794 | P:GO:0009058 | F:GO:0016740 | P:GO:0044711 | P:GO:0006139 | P:GO:0044723	P:carbohydrate metabolic process | C:membrane | C:Golgi apparatus | P:biosynthetic process | F:transferase activity | P:single-organism biosynthetic process | P:nucleobase-containing compound metabolic process | P:single-organism carbohydrate metabolic process	EC:2.4.1.12	Cellulose synthase (UDP-forming)	IPR029044 (G3DSA:3.90.550.GENE3D) | IPR005150 (PFAM) | PTHR13301 (PANTHER) | PTHR13301:SF89 (PANTHER) | IPR029044 (SUPERFAMILY) | TMhelix (TMHMM) | TMhelix (TMHMM) | TMhelix (TMHMM) | TMhelix (TMHMM) | TMhelix (TMHMM) | TMhelix (TMHMM) | TMhelix (TMHMM) | TMhelix (TMHMM)	C:GO:0016020 | P:GO:0030244 | F:GO:0016760	C:membrane	F:cellulose synthase (UDP-forming) activity
	VvCarFPS02VCR702_v1_PsGc_1018.ver1_0.g005860.m01	VvCarFPS02VCR702_v1_PsGc_1018.ver1_0.g005860	0	cellulose synthase G3	P:GO:0005975 | C:GO:0016020 | C:GO:0005794 | P:GO:0009058 | F:GO:0016740 | P:GO:0044711 | P:GO:0006139 | P:GO:0044723	P:carbohydrate metabolic process | C:membrane | C:Golgi apparatus | P:biosynthetic process | F:transferase activity | P:single-organism biosynthetic process | P:nucleobase-containing compound metabolic process | P:single-organism carbohydrate metabolic process	EC:2.4.1.12	Cellulose synthase (UDP-forming)	IPR005150 (PFAM) | IPR029044 (G3DSA:3.90.550.GENE3D) | PTHR13301:SF89 (PANTHER) | PTHR13301 (PANTHER) | IPR029044 (SUPERFAMILY) | TMhelix (TMHMM) | TMhelix (TMHMM) | TMhelix (TMHMM) | TMhelix (TMHMM) | TMhelix (TMHMM) | TMhelix (TMHMM)	C:GO:0016020 | F:GO:0016760 | P:GO:0030244	C:membrane	P:cellulose biosynthetic process
	VvCarFPS02VCR702_v1_PsGc_1018.ver1_0.g005870.m01	VvCarFPS02VCR702_v1_PsGc_1018.ver1_0.g005870	0	Cellulose synthase E6	P:GO:0005975 | C:GO:0016020 | C:GO:0005794 | P:GO:0009058 | F:GO:0016740 | P:GO:0044711 | P:GO:0006139 | P:GO:0044723	P:carbohydrate metabolic process | C:membrane | C:Golgi apparatus | P:biosynthetic process | F:transferase activity | P:single-organism biosynthetic process | P:nucleobase-containing compound metabolic process | P:single-organism carbohydrate metabolic process	EC:2.4.1.12	Cellulose synthase (UDP-forming)	IPR029044 (G3DSA:3.90.550.GENE3D) | IPR005150 (PFAM) | PTHR13301:SF89 (PANTHER) | PTHR13301 (PANTHER) | IPR029044 (SUPERFAMILY) | TMhelix (TMHMM) | TMhelix (TMHMM) | TMhelix (TMHMM) | TMhelix (TMHMM) | TMhelix (TMHMM) | TMhelix (TMHMM)	C:GO:0016020 | F:GO:0016760 | P:GO:0030244	C:membrane	P:cellulose biosynthetic process
	VvCarFPS02VCR702_v1_PsGc_1018.ver1_0.g005880.m01	VvCarFPS02VCR702_v1_PsGc_1018.ver1_0.g005880	0	cellulose synthase G3	P:GO:0005975 | C:GO:0016020 | P:GO:0009058 | F:GO:0016740 | P:GO:0044711 | P:GO:0006139 | P:GO:0044723	P:carbohydrate metabolic process | C:membrane | P:biosynthetic process | F:transferase activity | P:single-organism biosynthetic process | P:nucleobase-containing compound metabolic process | P:single-organism carbohydrate metabolic process	EC:2.4.1.12	Cellulose synthase (UDP-forming)	IPR005150 (PFAM) | PTHR13301:SF89 (PANTHER) | PTHR13301 (PANTHER)	C:GO:0016020 | P:GO:0030244 | F:GO:0016760	C:membrane	F:cellulose synthase (UDP-forming) activity
	VvCarFPS02VCR702_v1_PsGc_1018.ver1_0.g005890.m01	VvCarFPS02VCR702_v1_PsGc_1018.ver1_0.g005890	0	cellulose synthase G3	P:GO:0005975 | C:GO:0016020 | C:GO:0005794 | P:GO:0009058 | F:GO:0016740 | P:GO:0044711 | P:GO:0006139 | P:GO:0044723	P:carbohydrate metabolic process | C:membrane | C:Golgi apparatus | P:biosynthetic process | F:transferase activity | P:single-organism biosynthetic process | P:nucleobase-containing compound metabolic process | P:single-organism carbohydrate metabolic process	EC:2.4.1.12	Cellulose synthase (UDP-forming)	IPR029044 (G3DSA:3.90.550.GENE3D) | IPR005150 (PFAM) | PTHR13301 (PANTHER) | PTHR13301:SF89 (PANTHER) | IPR029044 (SUPERFAMILY) | TMhelix (TMHMM) | TMhelix (TMHMM) | TMhelix (TMHMM) | TMhelix (TMHMM) | TMhelix (TMHMM) | TMhelix (TMHMM) | TMhelix (TMHMM)	C:GO:0016020 | P:GO:0030244 | F:GO:0016760	C:membrane	F:cellulose synthase (UDP-forming) activity
	VvCarFPS02VCR702_v1_PsGc_1018.ver1_0.g005900.m01	VvCarFPS02VCR702_v1_PsGc_1018.ver1_0.g005900	0	Cellulose synthase G3	0	0	0	0	PTHR13301 (PANTHER) | PTHR13301:SF89 (PANTHER)	no GO terms	no GO terms
	VvCarFPS02VCR702_v1_PsGc_1018.ver1_0.g005910.m01	VvCarFPS02VCR702_v1_PsGc_1018.ver1_0.g005910	0	cellulose synthase G3	P:GO:0005975 | C:GO:0016020 | C:GO:0005794 | P:GO:0009058 | F:GO:0016740 | P:GO:0044711 | P:GO:0006139 | P:GO:0044723	P:carbohydrate metabolic process | C:membrane | C:Golgi apparatus | P:biosynthetic process | F:transferase activity | P:single-organism biosynthetic process | P:nucleobase-containing compound metabolic process | P:single-organism carbohydrate metabolic process	EC:2.4.1.12	Cellulose synthase (UDP-forming)	IPR029044 (G3DSA:3.90.550.GENE3D) | IPR005150 (PFAM) | PTHR13301:SF89 (PANTHER) | PTHR13301 (PANTHER) | IPR029044 (SUPERFAMILY) | TMhelix (TMHMM) | TMhelix (TMHMM)	C:GO:0016020 | F:GO:0016760 | P:GO:0030244	C:membrane	P:cellulose biosynthetic process
	VvCarFPS02VCR702_v1_PsGc_1018.ver1_0.g005920.m01	VvCarFPS02VCR702_v1_PsGc_1018.ver1_0.g005920	0	cellulose synthase G3	P:GO:0005975 | C:GO:0016020 | C:GO:0005794 | P:GO:0009058 | F:GO:0016740 | P:GO:0044711 | P:GO:0006139 | P:GO:0044723	P:carbohydrate metabolic process | C:membrane | C:Golgi apparatus | P:biosynthetic process | F:transferase activity | P:single-organism biosynthetic process | P:nucleobase-containing compound metabolic process | P:single-organism carbohydrate metabolic process	EC:2.4.1.12	Cellulose synthase (UDP-forming)	IPR029044 (G3DSA:3.90.550.GENE3D) | IPR005150 (PFAM) | PTHR13301:SF89 (PANTHER) | PTHR13301 (PANTHER) | IPR029044 (SUPERFAMILY) | TMhelix (TMHMM) | TMhelix (TMHMM) | TMhelix (TMHMM) | TMhelix (TMHMM) | TMhelix (TMHMM) | TMhelix (TMHMM)	C:GO:0016020 | F:GO:0016760 | P:GO:0030244	C:membrane	P:cellulose biosynthetic process
	VvCarFPS02VCR702_v1_PsGc_1018.ver1_0.g005930.m01	VvCarFPS02VCR702_v1_PsGc_1018.ver1_0.g005930	0	cellulose synthase G3	P:GO:0005975 | C:GO:0016020 | C:GO:0005794 | P:GO:0009058 | F:GO:0016740 | P:GO:0044711 | P:GO:0006139 | P:GO:0044723	P:carbohydrate metabolic process | C:membrane | C:Golgi apparatus | P:biosynthetic process | F:transferase activity | P:single-organism biosynthetic process | P:nucleobase-containing compound metabolic process | P:single-organism carbohydrate metabolic process	EC:2.4.1.12	Cellulose synthase (UDP-forming)	IPR029044 (G3DSA:3.90.550.GENE3D) | IPR005150 (PFAM) | PTHR13301:SF89 (PANTHER) | PTHR13301 (PANTHER) | IPR029044 (SUPERFAMILY) | TMhelix (TMHMM) | TMhelix (TMHMM) | TMhelix (TMHMM) | TMhelix (TMHMM) | TMhelix (TMHMM) | TMhelix (TMHMM)	C:GO:0016020 | F:GO:0016760 | P:GO:0030244	C:membrane	P:cellulose biosynthetic process
	VvCarFPS02VCR702_v1_PsGc_1018.ver1_0.g005940.m01	VvCarFPS02VCR702_v1_PsGc_1018.ver1_0.g005940	0	cellulose synthase G3	P:GO:0005975 | C:GO:0016020 | C:GO:0005794 | P:GO:0009058 | F:GO:0016740 | P:GO:0044711 | P:GO:0006139 | P:GO:0044723	P:carbohydrate metabolic process | C:membrane | C:Golgi apparatus | P:biosynthetic process | F:transferase activity | P:single-organism biosynthetic process | P:nucleobase-containing compound metabolic process | P:single-organism carbohydrate metabolic process	EC:2.4.1.12	Cellulose synthase (UDP-forming)	IPR029044 (G3DSA:3.90.550.GENE3D) | IPR005150 (PFAM) | PTHR13301 (PANTHER) | PTHR13301:SF89 (PANTHER) | IPR029044 (SUPERFAMILY) | TMhelix (TMHMM) | TMhelix (TMHMM) | TMhelix (TMHMM) | TMhelix (TMHMM) | TMhelix (TMHMM) | TMhelix (TMHMM) | TMhelix (TMHMM) | TMhelix (TMHMM)	C:GO:0016020 | F:GO:0016760 | P:GO:0030244	C:membrane	P:cellulose biosynthetic process
	VvCarFPS02VCR702_v1_PsGc_1018.ver1_0.g005950.m01	VvCarFPS02VCR702_v1_PsGc_1018.ver1_0.g005950	0	hypothetical protein PRUPE_ppa014120mg	0	0	0	0	no IPS match	no IPS match	no IPS match
	VvCarFPS02VCR702_v1_PsGc_1018.ver1_0.g005960.m01	VvCarFPS02VCR702_v1_PsGc_1018.ver1_0.g005960	0	cellulose synthase G3	0	0	0	0	PTHR13301 (PANTHER) | PTHR13301:SF89 (PANTHER) | TMhelix (TMHMM) | TMhelix (TMHMM) | TMhelix (TMHMM)	no GO terms	no GO terms
	VvCarFPS02VCR702_v1_PsGc_1018.ver1_0.g005970.m01	VvCarFPS02VCR702_v1_PsGc_1018.ver1_0.g005970	0	cellulose synthase G3	P:GO:0005975 | C:GO:0016020 | C:GO:0005794 | P:GO:0009058 | F:GO:0016740 | P:GO:0044711 | P:GO:0006139 | P:GO:0044723	P:carbohydrate metabolic process | C:membrane | C:Golgi apparatus | P:biosynthetic process | F:transferase activity | P:single-organism biosynthetic process | P:nucleobase-containing compound metabolic process | P:single-organism carbohydrate metabolic process	EC:2.4.1.12	Cellulose synthase (UDP-forming)	IPR029044 (G3DSA:3.90.550.GENE3D) | IPR005150 (PFAM) | PTHR13301:SF89 (PANTHER) | PTHR13301 (PANTHER) | IPR029044 (SUPERFAMILY) | TMhelix (TMHMM) | TMhelix (TMHMM)	C:GO:0016020 | F:GO:0016760 | P:GO:0030244	C:membrane	P:cellulose biosynthetic process
	VvCarFPS02VCR702_v1_PsGc_1018.ver1_0.g005980.m01	VvCarFPS02VCR702_v1_PsGc_1018.ver1_0.g005980	0	cellulose synthase G3	P:GO:0005975 | C:GO:0016020 | C:GO:0005794 | P:GO:0009058 | F:GO:0016740 | P:GO:0044711 | P:GO:0006139 | P:GO:0044723	P:carbohydrate metabolic process | C:membrane | C:Golgi apparatus | P:biosynthetic process | F:transferase activity | P:single-organism biosynthetic process | P:nucleobase-containing compound metabolic process | P:single-organism carbohydrate metabolic process	EC:2.4.1.12	Cellulose synthase (UDP-forming)	IPR029044 (G3DSA:3.90.550.GENE3D) | IPR005150 (PFAM) | PTHR13301 (PANTHER) | PTHR13301:SF89 (PANTHER) | IPR029044 (SUPERFAMILY) | TMhelix (TMHMM) | TMhelix (TMHMM)	C:GO:0016020 | P:GO:0030244 | F:GO:0016760	C:membrane	F:cellulose synthase (UDP-forming) activity
	VvCarFPS02VCR702_v1_PsGc_1018.ver1_0.g005990.m01	VvCarFPS02VCR702_v1_PsGc_1018.ver1_0.g005990	0	cellulose synthase G3	0	0	0	0	PTHR13301:SF89 (PANTHER) | PTHR13301 (PANTHER) | TMhelix (TMHMM) | TMhelix (TMHMM) | TMhelix (TMHMM)	no GO terms	no GO terms
	VvCarFPS02VCR702_v1_PsGc_1018.ver1_0.g006000.m01	VvCarFPS02VCR702_v1_PsGc_1018.ver1_0.g006000	0	cellulose synthase G3	P:GO:0005975 | C:GO:0016020 | C:GO:0005794 | P:GO:0009058 | F:GO:0016740 | P:GO:0044711 | P:GO:0006139 | P:GO:0044723	P:carbohydrate metabolic process | C:membrane | C:Golgi apparatus | P:biosynthetic process | F:transferase activity | P:single-organism biosynthetic process | P:nucleobase-containing compound metabolic process | P:single-organism carbohydrate metabolic process	EC:2.4.1.12	Cellulose synthase (UDP-forming)	IPR005150 (PFAM) | IPR029044 (G3DSA:3.90.550.GENE3D) | PTHR13301 (PANTHER) | PTHR13301:SF89 (PANTHER) | IPR029044 (SUPERFAMILY) | TMhelix (TMHMM) | TMhelix (TMHMM)	C:GO:0016020 | P:GO:0030244 | F:GO:0016760	C:membrane	F:cellulose synthase (UDP-forming) activity
	VvCarFPS02VCR702_v1_PsGc_1018.ver1_0.g006010.m01	VvCarFPS02VCR702_v1_PsGc_1018.ver1_0.g006010	0	cellulose synthase G3	P:GO:0005975 | C:GO:0016020 | C:GO:0005794 | P:GO:0009058 | F:GO:0016740 | P:GO:0044711 | P:GO:0006139 | P:GO:0044723	P:carbohydrate metabolic process | C:membrane | C:Golgi apparatus | P:biosynthetic process | F:transferase activity | P:single-organism biosynthetic process | P:nucleobase-containing compound metabolic process | P:single-organism carbohydrate metabolic process	EC:2.4.1.12	Cellulose synthase (UDP-forming)	IPR005150 (PFAM) | IPR029044 (G3DSA:3.90.550.GENE3D) | PTHR13301 (PANTHER) | PTHR13301:SF89 (PANTHER) | IPR029044 (SUPERFAMILY) | TMhelix (TMHMM) | TMhelix (TMHMM) | TMhelix (TMHMM) | TMhelix (TMHMM) | TMhelix (TMHMM) | TMhelix (TMHMM) | TMhelix (TMHMM) | TMhelix (TMHMM)	C:GO:0016020 | P:GO:0030244 | F:GO:0016760	C:membrane	F:cellulose synthase (UDP-forming) activity
	VvCarFPS02VCR702_v1_PsGc_1018.ver1_0.g006020.m01	VvCarFPS02VCR702_v1_PsGc_1018.ver1_0.g006020	0	subtilisin-like protease	P:GO:0019538 | F:GO:0016787	P:protein metabolic process | F:hydrolase activity	EC:3.4.21	Acting on peptide bonds (peptidases)	G3DSA:3.50.30.30 (GENE3D) | mobidb-lite (MOBIDB_LITE) | PTHR10795:SF382 (PANTHER) | PTHR10795:SF382 (PANTHER) | PTHR10795 (PANTHER) | IPR036852 (SUPERFAMILY)	P:GO:0006508 | F:GO:0004252	P:proteolysis
	VvCarFPS02VCR702_v1_PsGc_1018.ver1_0.g006030.m01	VvCarFPS02VCR702_v1_PsGc_1018.ver1_0.g006030	0	cellulose synthase G3	P:GO:0005975 | C:GO:0016020 | C:GO:0005794 | P:GO:0009058 | F:GO:0016740 | P:GO:0044711 | P:GO:0006139 | P:GO:0044723	P:carbohydrate metabolic process | C:membrane | C:Golgi apparatus | P:biosynthetic process | F:transferase activity | P:single-organism biosynthetic process | P:nucleobase-containing compound metabolic process | P:single-organism carbohydrate metabolic process	EC:2.4.1.12	Cellulose synthase (UDP-forming)	IPR005150 (PFAM) | IPR029044 (G3DSA:3.90.550.GENE3D) | PTHR13301:SF89 (PANTHER) | PTHR13301:SF89 (PANTHER) | PTHR13301 (PANTHER) | IPR029044 (SUPERFAMILY) | TMhelix (TMHMM) | TMhelix (TMHMM) | TMhelix (TMHMM) | TMhelix (TMHMM) | TMhelix (TMHMM) | TMhelix (TMHMM) | TMhelix (TMHMM)	C:GO:0016020 | F:GO:0016760 | P:GO:0030244	C:membrane	P:cellulose biosynthetic process
	VvCarFPS02VCR702_v1_PsGc_1018.ver1_0.g006040.m01	VvCarFPS02VCR702_v1_PsGc_1018.ver1_0.g006040	0	cellulose synthase G3	P:GO:0005975 | C:GO:0016020 | C:GO:0005794 | P:GO:0009058 | F:GO:0016740 | P:GO:0044711 | P:GO:0006139 | P:GO:0044723	P:carbohydrate metabolic process | C:membrane | C:Golgi apparatus | P:biosynthetic process | F:transferase activity | P:single-organism biosynthetic process | P:nucleobase-containing compound metabolic process | P:single-organism carbohydrate metabolic process	EC:2.4.1.12	Cellulose synthase (UDP-forming)	IPR029044 (G3DSA:3.90.550.GENE3D) | IPR005150 (PFAM) | PTHR13301:SF89 (PANTHER) | PTHR13301 (PANTHER) | IPR029044 (SUPERFAMILY) | TMhelix (TMHMM) | TMhelix (TMHMM) | TMhelix (TMHMM) | TMhelix (TMHMM) | TMhelix (TMHMM) | TMhelix (TMHMM) | TMhelix (TMHMM) | TMhelix (TMHMM)	C:GO:0016020 | P:GO:0030244 | F:GO:0016760	C:membrane	F:cellulose synthase (UDP-forming) activity
	VvCarFPS02VCR702_v1_PsGc_1018.ver1_0.g006050.m01	VvCarFPS02VCR702_v1_PsGc_1018.ver1_0.g006050	0	cellulose synthase G3	P:GO:0005975 | C:GO:0016020 | C:GO:0005794 | P:GO:0009058 | F:GO:0016740 | P:GO:0044711 | P:GO:0006139 | P:GO:0044723	P:carbohydrate metabolic process | C:membrane | C:Golgi apparatus | P:biosynthetic process | F:transferase activity | P:single-organism biosynthetic process | P:nucleobase-containing compound metabolic process | P:single-organism carbohydrate metabolic process	EC:2.4.1.12	Cellulose synthase (UDP-forming)	IPR029044 (G3DSA:3.90.550.GENE3D) | IPR005150 (PFAM) | PTHR13301 (PANTHER) | PTHR13301:SF89 (PANTHER) | IPR029044 (SUPERFAMILY) | TMhelix (TMHMM) | TMhelix (TMHMM) | TMhelix (TMHMM) | TMhelix (TMHMM) | TMhelix (TMHMM) | TMhelix (TMHMM) | TMhelix (TMHMM) | TMhelix (TMHMM)	C:GO:0016020 | F:GO:0016760 | P:GO:0030244	C:membrane	P:cellulose biosynthetic process
	VvCarFPS02VCR702_v1_PsGc_1018.ver1_0.g006060.m01	VvCarFPS02VCR702_v1_PsGc_1018.ver1_0.g006060	0	hypothetical protein PRUPE_ppa014120mg	0	0	0	0	no IPS match	no IPS match	no IPS match
	VvCarFPS02VCR702_v1_PsGc_1018.ver1_0.g006070.m01	VvCarFPS02VCR702_v1_PsGc_1018.ver1_0.g006070	0	cellulose synthase G3	P:GO:0005975 | C:GO:0016020 | P:GO:0009058 | F:GO:0016740 | P:GO:0044711 | P:GO:0006139 | P:GO:0044723	P:carbohydrate metabolic process | C:membrane | P:biosynthetic process | F:transferase activity | P:single-organism biosynthetic process | P:nucleobase-containing compound metabolic process | P:single-organism carbohydrate metabolic process	EC:2.4.1.12	Cellulose synthase (UDP-forming)	IPR029044 (G3DSA:3.90.550.GENE3D) | IPR005150 (PFAM) | PTHR13301:SF89 (PANTHER) | PTHR13301 (PANTHER)	C:GO:0016020 | P:GO:0030244 | F:GO:0016760	C:membrane	F:cellulose synthase (UDP-forming) activity
	VvCarFPS02VCR702_v1_PsGc_1018.ver1_0.g006080.m01	VvCarFPS02VCR702_v1_PsGc_1018.ver1_0.g006080	0	cellulose synthase G3	P:GO:0005975 | C:GO:0016020 | C:GO:0005794 | P:GO:0009058 | F:GO:0016740 | P:GO:0044711 | P:GO:0006139 | P:GO:0044723	P:carbohydrate metabolic process | C:membrane | C:Golgi apparatus | P:biosynthetic process | F:transferase activity | P:single-organism biosynthetic process | P:nucleobase-containing compound metabolic process | P:single-organism carbohydrate metabolic process	EC:2.4.1.12	Cellulose synthase (UDP-forming)	IPR005150 (PFAM) | IPR029044 (G3DSA:3.90.550.GENE3D) | PTHR13301 (PANTHER) | PTHR13301:SF89 (PANTHER) | IPR029044 (SUPERFAMILY) | TMhelix (TMHMM) | TMhelix (TMHMM)	C:GO:0016020 | P:GO:0030244 | F:GO:0016760	C:membrane	F:cellulose synthase (UDP-forming) activity
	VvCarFPS02VCR702_v1_PsGc_1018.ver1_0.g006090.m01	VvCarFPS02VCR702_v1_PsGc_1018.ver1_0.g006090	0	auxin response factor 2	C:GO:0005634 | F:GO:0003677 | F:GO:0005515 | P:GO:0009719 | P:GO:0009058 | P:GO:0006139	C:nucleus | F:DNA binding | F:protein binding | P:response to endogenous stimulus | P:biosynthetic process | P:nucleobase-containing compound metabolic process	0	0	IPR003340 (SMART) | IPR033389 (PFAM) | IPR003340 (PFAM) | G3DSA:3.10.20.90 (GENE3D) | IPR010525 (PFAM) | IPR015300 (G3DSA:2.40.330.GENE3D) | G3DSA:2.30.30.1040 (GENE3D) | mobidb-lite (MOBIDB_LITE) | mobidb-lite (MOBIDB_LITE) | mobidb-lite (MOBIDB_LITE) | PTHR31384 (PANTHER) | PTHR31384:SF17 (PANTHER) | IPR003340 (PROSITE_PROFILES) | IPR000270 (PROSITE_PROFILES) | IPR003340 (CDD) | SSF54277 (SUPER…	F:GO:0003677 | C:GO:0005634 | F:GO:0005515 | P:GO:0006355 | P:GO:0009725	F:DNA binding	F:protein binding	P:regulation of transcription, DNA-templated	P:response to hormone
	VvCarFPS02VCR702_v1_PsGc_1018.ver1_0.g006100.m01	VvCarFPS02VCR702_v1_PsGc_1018.ver1_0.g006100	0	3-oxoacyl-[acyl-carrier- ] synthase chloroplastic-like	P:GO:0006629 | P:GO:0009058 | P:GO:0044763 | F:GO:0016740 | P:GO:0044711 | P:GO:0009987	P:lipid metabolic process | P:biosynthetic process | P:single-organism cellular process | F:transferase activity | P:single-organism biosynthetic process | P:cellular process	0	0	IPR020841 (SMART) | IPR014031 (PFAM) | IPR016039 (G3DSA:3.40.47.GENE3D) | IPR014030 (PFAM) | IPR017568 (TIGRFAM) | IPR016039 (G3DSA:3.40.47.GENE3D) | PTHR11712:SF283 (PANTHER) | PTHR11712 (PANTHER) | IPR018201 (PROSITE_PATTERNS) | cd00834 (CDD) | IPR016039 (SUPERFAMILY) | IPR016039 (SUPERFAMILY)	F:GO:0016747 | F:GO:0003824 | P:GO:0008152 | P:GO:0006633	F:transferase activity, transferring acyl groups other than amino-acyl groups	P:metabolic process	P:fatty acid biosynthetic process
	VvCarFPS02VCR702_v1_PsGc_1018.ver1_0.g006110.m01	VvCarFPS02VCR702_v1_PsGc_1018.ver1_0.g006110	0	DCD (development and cell death) domain	C:GO:0016020	C:membrane	0	0	IPR013989 (SMART) | IPR013989 (PFAM) | mobidb-lite (MOBIDB_LITE) | PTHR10857:SF66 (PANTHER) | PTHR10857 (PANTHER) | IPR013989 (PROSITE_PROFILES)	no GO terms	no GO terms
	VvCarFPS02VCR702_v1_PsGc_1018.ver1_0.g006120.m01	VvCarFPS02VCR702_v1_PsGc_1018.ver1_0.g006120	0	glutaredoxin family	C:GO:0005623 | P:GO:0019725 | F:GO:0003824	C:cell | P:cellular homeostasis | F:catalytic activity	0	0	IPR002109 (PFAM) | G3DSA:3.40.30.10 (GENE3D) | mobidb-lite (MOBIDB_LITE) | PTHR10168 (PANTHER) | PTHR10168:SF61 (PANTHER) | IPR002109 (PROSITE_PROFILES) | cd03031 (CDD) | IPR036249 (SUPERFAMILY)	F:GO:0015035 | F:GO:0009055 | P:GO:0045454	F:protein disulfide oxidoreductase activity	P:cell redox homeostasis
	VvCarFPS02VCR702_v1_PsGc_1018.ver1_0.g006130.m01	VvCarFPS02VCR702_v1_PsGc_1018.ver1_0.g006130	0	RNA polymerase II transcriptional coactivator KELP	F:GO:0003677 | P:GO:0009058 | P:GO:0006139 | C:GO:0005622	F:DNA binding | P:biosynthetic process | P:nucleobase-containing compound metabolic process | C:intracellular	0	0	IPR014876 (PFAM) | IPR017415 (PIRSF) | IPR009044 (G3DSA:2.30.31.GENE3D) | IPR003173 (PFAM) | mobidb-lite (MOBIDB_LITE) | PTHR13215:SF6 (PANTHER) | PTHR13215 (PANTHER) | IPR009044 (SUPERFAMILY) | SSF109715 (SUPERFAMILY)	F:GO:0003677 | F:GO:0003713 | P:GO:0006355	F:DNA binding	P:regulation of transcription, DNA-templated
	VvCarFPS02VCR702_v1_PsGc_1018.ver1_0.g006140.m01	VvCarFPS02VCR702_v1_PsGc_1018.ver1_0.g006140	0	uncharacterized LOC103649536	C:GO:0016020 | C:GO:0009536 | C:GO:0009579	C:membrane | C:plastid | C:thylakoid	0	0	mobidb-lite (MOBIDB_LITE) | mobidb-lite (MOBIDB_LITE)	no GO terms	no GO terms
	VvCarFPS02VCR702_v1_PsGc_1018.ver1_0.g006150.m01	VvCarFPS02VCR702_v1_PsGc_1018.ver1_0.g006150	0	nuclear transport factor 2 (NTF2) family	F:GO:0005515 | C:GO:0016020	F:protein binding | C:membrane	0	0	IPR037401 (PFAM) | G3DSA:3.10.450.50 (GENE3D) | G3DSA:1.20.1280.50 (GENE3D) | PTHR15537:SF4 (PANTHER) | PTHR15537 (PANTHER) | IPR001810 (PROSITE_PROFILES) | IPR036047 (SUPERFAMILY) | IPR032710 (SUPERFAMILY) | TMhelix (TMHMM)	F:GO:0005515	F:protein binding
	VvCarFPS02VCR702_v1_PsGc_1018.ver1_0.g006160.m01	VvCarFPS02VCR702_v1_PsGc_1018.ver1_0.g006160	0	Galactose-binding	C:GO:0016020	C:membrane	0	0	Coil (COILS) | Coil (COILS) | IPR008979 (G3DSA:2.60.120.GENE3D) | IPR012919 (PFAM) | PTHR12953 (PANTHER) | PTHR12953:SF1 (PANTHER) | IPR012919 (PROSITE_PROFILES) | IPR008979 (SUPERFAMILY) | TMhelix (TMHMM) | TMhelix (TMHMM) | TMhelix (TMHMM)	no GO terms	no GO terms
	VvCarFPS02VCR702_v1_PsGc_1018.ver1_0.g006170.m01	VvCarFPS02VCR702_v1_PsGc_1018.ver1_0.g006170	0	E3 ubiquitin- ligase SINAT5-like	C:GO:0005634 | P:GO:0019538 | F:GO:0005515 | P:GO:0009056 | P:GO:0007275 | P:GO:0009987	C:nucleus | P:protein metabolic process | F:protein binding | P:catabolic process | P:multicellular organism development | P:cellular process	0	0	IPR008974 (G3DSA:2.60.210.GENE3D) | IPR013083 (G3DSA:3.30.40.GENE3D) | IPR018121 (PFAM) | PTHR10315:SF42 (PANTHER) | IPR004162 (PANTHER) | IPR001841 (PROSITE_PROFILES) | IPR013010 (PROSITE_PROFILES) | cd03829 (CDD) | cd16571 (CDD) | SSF57850 (SUPERFAMILY) | IPR008974 (SUPERFAMILY)	C:GO:0005634 | F:GO:0008270 | F:GO:0005515 | P:GO:0007275 | P:GO:0006511	C:nucleus	F:protein binding	P:multicellular organism development	P:ubiquitin-dependent protein catabolic process
	VvCarFPS02VCR702_v1_PsGc_1018.ver1_0.g006180.m01	VvCarFPS02VCR702_v1_PsGc_1018.ver1_0.g006180	0	RING U-box	F:GO:0005488	F:binding	0	0	IPR001965 (SMART) | IPR001841 (SMART) | IPR019787 (PFAM) | IPR013083 (G3DSA:3.30.40.GENE3D) | IPR001841 (PFAM) | IPR013083 (G3DSA:3.30.40.GENE3D) | mobidb-lite (MOBIDB_LITE) | mobidb-lite (MOBIDB_LITE) | mobidb-lite (MOBIDB_LITE) | mobidb-lite (MOBIDB_LITE) | mobidb-lite (MOBIDB_LITE) | mobidb-lite (MOBIDB_LITE) | PTHR22937:SF76 (PANTHER) | PTHR22937:SF76 (PANTHER) | PTHR22937 (PANTHER) | PTHR229…	no GO terms	no GO terms
	VvCarFPS02VCR702_v1_PsGc_1018.ver1_0.g006190.m01	VvCarFPS02VCR702_v1_PsGc_1018.ver1_0.g006190	0	Calcineurin B 7	F:GO:0005488	F:binding	0	0	PR00450 (PRINTS) | IPR002048 (SMART) | IPR002048 (PFAM) | IPR002048 (PFAM) | G3DSA:1.10.238.10 (GENE3D) | PTHR23056:SF59 (PANTHER) | PTHR23056 (PANTHER) | IPR002048 (PROSITE_PROFILES) | IPR002048 (PROSITE_PROFILES) | IPR002048 (PROSITE_PROFILES) | IPR002048 (CDD) | IPR011992 (SUPERFAMILY)	F:GO:0005509	F:calcium ion binding
	VvCarFPS02VCR702_v1_PsGc_1018.ver1_0.g006200.m01	VvCarFPS02VCR702_v1_PsGc_1018.ver1_0.g006200	0	calcineurin B 7	F:GO:0005488	F:binding	0	0	PR00450 (PRINTS) | IPR002048 (SMART) | IPR002048 (PFAM) | G3DSA:1.10.238.10 (GENE3D) | IPR002048 (PFAM) | PTHR23056 (PANTHER) | PTHR23056:SF85 (PANTHER) | IPR002048 (PROSITE_PROFILES) | IPR002048 (PROSITE_PROFILES) | IPR002048 (PROSITE_PROFILES) | IPR002048 (CDD) | IPR011992 (SUPERFAMILY)	F:GO:0005509	F:calcium ion binding
	VvCarFPS02VCR702_v1_PsGc_1018.ver1_0.g006210.m01	VvCarFPS02VCR702_v1_PsGc_1018.ver1_0.g006210	0	GDSL-like lipase acylhydrolase	F:GO:0016787	F:hydrolase activity	0	0	IPR001087 (PFAM) | IPR036514 (G3DSA:3.40.50.GENE3D) | mobidb-lite (MOBIDB_LITE) | PTHR22835 (PANTHER) | PTHR22835:SF281 (PANTHER) | IPR035669 (CDD) | SignalP-TM (SIGNALP_GRAM_POSITIVE) | SignalP-noTM (SIGNALP_EUK) | SSF52266 (SUPERFAMILY)	F:GO:0016788	F:hydrolase activity, acting on ester bonds
	VvCarFPS02VCR702_v1_PsGc_1018.ver1_0.g006220.m01	VvCarFPS02VCR702_v1_PsGc_1018.ver1_0.g006220	0	glucose-1-phosphate adenylyltransferase	0	0	0	0	mobidb-lite (MOBIDB_LITE)	no GO terms	no GO terms
	VvCarFPS02VCR702_v1_PsGc_1018.ver1_0.g006230.m01	VvCarFPS02VCR702_v1_PsGc_1018.ver1_0.g006230	0	phosphatidylinositol 4-kinase gamma 4-like	F:GO:0005515 | F:GO:0016301	F:protein binding | F:kinase activity	0	0	IPR000626 (SMART) | G3DSA:3.10.20.90 (GENE3D) | IPR000403 (PFAM) | IPR000626 (PFAM) | G3DSA:3.10.20.90 (GENE3D) | mobidb-lite (MOBIDB_LITE) | PTHR10666 (PANTHER) | PTHR10666:SF134 (PANTHER) | IPR000626 (PROSITE_PROFILES) | IPR000626 (PROSITE_PROFILES) | IPR011009 (SUPERFAMILY) | IPR029071 (SUPERFAMILY) | IPR029071 (SUPERFAMILY)	F:GO:0005515	F:protein binding
	VvCarFPS02VCR702_v1_PsGc_1018.ver1_0.g006240.m01	VvCarFPS02VCR702_v1_PsGc_1018.ver1_0.g006240	0	late embryogenesis abundant At1g64065	C:GO:0016020	C:membrane	0	0	IPR004864 (PFAM) | PTHR31852:SF22 (PANTHER) | PTHR31852 (PANTHER) | TMhelix (TMHMM)	no GO terms	no GO terms
	VvCarFPS02VCR702_v1_PsGc_1018.ver1_0.g006250.m01	VvCarFPS02VCR702_v1_PsGc_1018.ver1_0.g006250	0	GDSL esterase lipase At4g10955-like	P:GO:0006629 | F:GO:0016787	P:lipid metabolic process | F:hydrolase activity	0	0	IPR029058 (G3DSA:3.40.50.GENE3D) | IPR002921 (PFAM) | PTHR31479 (PANTHER) | PTHR31479:SF4 (PANTHER) | IPR029058 (SUPERFAMILY)	P:GO:0006629	P:lipid metabolic process
	VvCarFPS02VCR702_v1_PsGc_1018.ver1_0.g006260.m01	VvCarFPS02VCR702_v1_PsGc_1018.ver1_0.g006260	0	UDP-glucose 4-epimerase GEPI48-like	P:GO:0005975 | F:GO:0003824 | P:GO:0006139 | P:GO:0044723	P:carbohydrate metabolic process | F:catalytic activity | P:nucleobase-containing compound metabolic process | P:single-organism carbohydrate metabolic process	EC:5.1.3.2	UDP-glucose 4-epimerase	IPR005886 (TIGRFAM) | G3DSA:3.90.25.10 (GENE3D) | IPR016040 (PFAM) | G3DSA:3.40.50.720 (GENE3D) | PTHR43725:SF11 (PANTHER) | PTHR43725 (PANTHER) | IPR005886 (CDD) | IPR036291 (SUPERFAMILY)	F:GO:0003978 | P:GO:0006012	F:UDP-glucose 4-epimerase activity
	VvCarFPS02VCR702_v1_PsGc_1018.ver1_0.g006270.m01	VvCarFPS02VCR702_v1_PsGc_1018.ver1_0.g006270	0	hypothetical protein CHLNCDRAFT_144195	0	0	0	0	no IPS match	no IPS match	no IPS match
	VvCarFPS02VCR702_v1_PsGc_1018.ver1_0.g006280.m01	VvCarFPS02VCR702_v1_PsGc_1018.ver1_0.g006280	0	dynamin-related 5A	F:GO:0000166 | C:GO:0005737 | F:GO:0016787	F:nucleotide binding | C:cytoplasm | F:hydrolase activity	EC:3.6.1.15	Nucleoside-triphosphate phosphatase	IPR022812 (PRINTS) | IPR001401 (SMART) | IPR003130 (SMART) | IPR000375 (PFAM) | G3DSA:3.40.50.300 (GENE3D) | IPR003130 (PFAM) | G3DSA:1.20.120.1240 (GENE3D) | IPR022812 (PFAM) | IPR022812 (PANTHER) | PTHR11566:SF58 (PANTHER) | IPR019762 (PROSITE_PATTERNS) | IPR020850 (PROSITE_PROFILES) | IPR030381 (PROSITE_PROFILES) | IPR001401 (CDD) | IPR027417 (SUPERFAMILY)	F:GO:0005525 | F:GO:0003924	F:GTP binding
	VvCarFPS02VCR702_v1_PsGc_1018.ver1_0.g006290.m01	VvCarFPS02VCR702_v1_PsGc_1018.ver1_0.g006290	0	UDP-D-glucose UDP-D-galactose 4-epimerase	P:GO:0005975 | F:GO:0003824 | P:GO:0006139 | P:GO:0044723	P:carbohydrate metabolic process | F:catalytic activity | P:nucleobase-containing compound metabolic process | P:single-organism carbohydrate metabolic process	EC:5.1.3.2	UDP-glucose 4-epimerase	G3DSA:3.90.25.10 (GENE3D) | IPR016040 (PFAM) | G3DSA:3.40.50.720 (GENE3D) | IPR005886 (TIGRFAM) | PTHR43725:SF11 (PANTHER) | PTHR43725 (PANTHER) | IPR005886 (CDD) | IPR036291 (SUPERFAMILY)	F:GO:0003978 | P:GO:0006012	F:UDP-glucose 4-epimerase activity
	VvCarFPS02VCR702_v1_PsGc_1018.ver1_0.g006300.m01	VvCarFPS02VCR702_v1_PsGc_1018.ver1_0.g006300	0	probable WRKY transcription factor 26	0	0	0	0	no IPS match	no IPS match	no IPS match
	VvCarFPS02VCR702_v1_PsGc_1018.ver1_0.g006310.m01	VvCarFPS02VCR702_v1_PsGc_1018.ver1_0.g006310	0	phosphatase 2C family	0	0	0	0	IPR036457 (G3DSA:3.60.40.GENE3D) | mobidb-lite (MOBIDB_LITE) | IPR036457 (SUPERFAMILY)	no GO terms	no GO terms
	VvCarFPS02VCR702_v1_PsGc_1018.ver1_0.g006320.m01	VvCarFPS02VCR702_v1_PsGc_1018.ver1_0.g006320	0	probable phosphatase 2C 8	C:GO:0005623 | P:GO:0006464 | F:GO:0005488 | F:GO:0016787	C:cell | P:cellular protein modification process | F:binding | F:hydrolase activity	EC:3.1.3.16 | EC:3.1.3.41	Protein-serine/threonine phosphatase | 4-nitrophenylphosphatase	IPR001932 (SMART) | IPR001932 (SMART) | IPR036457 (G3DSA:3.60.40.GENE3D) | IPR001932 (PFAM) | mobidb-lite (MOBIDB_LITE) | IPR015655 (PANTHER) | PTHR13832:SF527 (PANTHER) | IPR000222 (PROSITE_PATTERNS) | IPR001932 (PROSITE_PROFILES) | IPR001932 (CDD) | IPR036457 (SUPERFAMILY)	F:GO:0004722 | F:GO:0003824 | P:GO:0006470 | F:GO:0043169	F:protein serine/threonine phosphatase activity	P:protein dephosphorylation	F:cation binding
	VvCarFPS02VCR702_v1_PsGc_1018.ver1_0.g006330.m01	VvCarFPS02VCR702_v1_PsGc_1018.ver1_0.g006330	0	phosphatase 2C family	C:GO:0005623 | P:GO:0006464 | F:GO:0016787	C:cell | P:cellular protein modification process | F:hydrolase activity	EC:3.1.3.16 | EC:3.1.3.41	Protein-serine/threonine phosphatase | 4-nitrophenylphosphatase	IPR036457 (G3DSA:3.60.40.GENE3D) | IPR001932 (PFAM) | mobidb-lite (MOBIDB_LITE) | PTHR13832:SF527 (PANTHER) | IPR015655 (PANTHER) | IPR001932 (PROSITE_PROFILES) | IPR036457 (SUPERFAMILY)	F:GO:0004722 | F:GO:0003824 | P:GO:0006470	F:protein serine/threonine phosphatase activity	P:protein dephosphorylation
	VvCarFPS02VCR702_v1_PsGc_1018.ver1_0.g006340.m01	VvCarFPS02VCR702_v1_PsGc_1018.ver1_0.g006340	0	cytochrome b561 and DOMON domain-containing At3g61750-like	0	0	0	0	IPR005018 (SMART) | IPR006593 (SMART) | PTHR23130 (PANTHER) | PTHR23130:SF86 (PANTHER) | IPR005018 (PROSITE_PROFILES) | IPR006593 (PROSITE_PROFILES) | cd08760 (CDD) | cd09631 (CDD) | SignalP-noTM (SIGNALP_EUK) | TMhelix (TMHMM) | TMhelix (TMHMM) | TMhelix (TMHMM) | TMhelix (TMHMM) | TMhelix (TMHMM)	no GO terms	no GO terms
	VvCarFPS02VCR702_v1_PsGc_1018.ver1_0.g006350.m01	VvCarFPS02VCR702_v1_PsGc_1018.ver1_0.g006350	0	pentatricopeptide repeat-containing At3g16010	F:GO:0005515	F:protein binding	0	0	IPR011990 (G3DSA:1.25.40.GENE3D) | PTHR37381 (PANTHER) | IPR002885 (PROSITE_PROFILES) | IPR002885 (PROSITE_PROFILES)	F:GO:0005515	F:protein binding
	VvCarFPS02VCR702_v1_PsGc_1018.ver1_0.g006360.m01	VvCarFPS02VCR702_v1_PsGc_1018.ver1_0.g006360	0	Pentatricopeptide repeat (PPR) superfamily	0	0	0	0	Coil (COILS) | Coil (COILS) | PTHR37381 (PANTHER) | TMhelix (TMHMM) | TMhelix (TMHMM)	no GO terms	no GO terms
	VvCarFPS02VCR702_v1_PsGc_1018.ver1_0.g006370.m01	VvCarFPS02VCR702_v1_PsGc_1018.ver1_0.g006370	0	ribosome maturation factor	C:GO:0016020	C:membrane	0	0	mobidb-lite (MOBIDB_LITE) | mobidb-lite (MOBIDB_LITE) | PTHR36048 (PANTHER)	no GO terms	no GO terms
	VvCarFPS02VCR702_v1_PsGc_1018.ver1_0.g006380.m01	VvCarFPS02VCR702_v1_PsGc_1018.ver1_0.g006380	0	Nucleoside diphosphate kinase 1	F:GO:0000166 | P:GO:0009058 | P:GO:0044711 | F:GO:0016301 | P:GO:0006139	F:nucleotide binding | P:biosynthetic process | P:single-organism biosynthetic process | F:kinase activity | P:nucleobase-containing compound metabolic process	EC:2.7.4.6	Nucleoside-diphosphate kinase	IPR001564 (PRINTS) | IPR034907 (SMART) | IPR036850 (G3DSA:3.30.70.GENE3D) | IPR034907 (PFAM) | PTHR11349:SF91 (PANTHER) | PTHR11349 (PANTHER) | IPR023005 (PROSITE_PATTERNS) | IPR001564 (HAMAP) | cd04413 (CDD) | SignalP-TM (SIGNALP_GRAM_POSITIVE) | IPR036850 (SUPERFAMILY)	P:GO:0006228 | P:GO:0006241 | P:GO:0006183 | P:GO:0006165 | F:GO:0004550	P:UTP biosynthetic process	P:GTP biosynthetic process	P:nucleoside diphosphate phosphorylation	F:nucleoside diphosphate kinase activity
	VvCarFPS02VCR702_v1_PsGc_1018.ver1_0.g006390.m01	VvCarFPS02VCR702_v1_PsGc_1018.ver1_0.g006390	0	26S proteasome non-ATPase regulatory subunit 7 homolog A-like	F:GO:0005515 | C:GO:0005622	F:protein binding | C:intracellular	0	0	IPR000555 (SMART) | G3DSA:3.40.140.10 (GENE3D) | IPR024969 (PFAM) | IPR000555 (PFAM) | PTHR10540 (PANTHER) | IPR033858 (PTHR10540:PANTHER) | IPR037518 (PROSITE_PROFILES) | IPR033858 (CDD)	F:GO:0005515 | C:GO:0005838	F:protein binding
	VvCarFPS02VCR702_v1_PsGc_1018.ver1_0.g006400.m01	VvCarFPS02VCR702_v1_PsGc_1018.ver1_0.g006400	0	Pleckstrin homology (PH) domain-containing	F:GO:0000166	F:nucleotide binding	0	0	Coil (COILS) | IPR001849 (SMART) | IPR011993 (G3DSA:2.30.29.GENE3D) | PTHR34837 (PANTHER) | PTHR34837:SF2 (PANTHER) | IPR001849 (PROSITE_PROFILES) | cd00821 (CDD) | SSF50729 (SUPERFAMILY) | TMhelix (TMHMM)	no GO terms	no GO terms
	VvCarFPS02VCR702_v1_PsGc_1018.ver1_0.g006410.m01	VvCarFPS02VCR702_v1_PsGc_1018.ver1_0.g006410	0	zinc finger CCCH domain-containing 13-like	0	0	0	0	mobidb-lite (MOBIDB_LITE) | mobidb-lite (MOBIDB_LITE) | PTHR34837 (PANTHER) | PTHR34837:SF1 (PANTHER)	no GO terms	no GO terms
	VvCarFPS02VCR702_v1_PsGc_1018.ver1_0.g006420.m01	VvCarFPS02VCR702_v1_PsGc_1018.ver1_0.g006420	0	zinc finger CCCH domain-containing 13-like	0	0	0	0	Coil (COILS) | mobidb-lite (MOBIDB_LITE) | PTHR34837 (PANTHER) | PTHR34837:SF2 (PANTHER)	no GO terms	no GO terms
	VvCarFPS02VCR702_v1_PsGc_1018.ver1_0.g006430.m01	VvCarFPS02VCR702_v1_PsGc_1018.ver1_0.g006430	0	NAD(P)H-quinone oxidoreductase subunit chloroplastic	P:GO:0006091 | P:GO:0015979	P:generation of precursor metabolites and energy | P:photosynthesis	0	0	G3DSA:2.30.30.140 (GENE3D) | IPR021659 (PFAM) | IPR021659 (PANTHER) | SignalP-noTM (SIGNALP_EUK) | SignalP-noTM (SIGNALP_GRAM_NEGATIVE) | TMhelix (TMHMM)	P:GO:0009767	P:photosynthetic electron transport chain
	VvCarFPS02VCR702_v1_PsGc_1018.ver1_0.g006440.m01	VvCarFPS02VCR702_v1_PsGc_1018.ver1_0.g006440	0	uncharacterized protein LOC109810939	C:GO:0005739	C:mitochondrion	0	0	mobidb-lite (MOBIDB_LITE) | PTHR35751 (PANTHER)	no GO terms	no GO terms
	VvCarFPS02VCR702_v1_PsGc_1018.ver1_0.g006450.m01	VvCarFPS02VCR702_v1_PsGc_1018.ver1_0.g006450	0	hypothetical protein L484_001387	0	0	0	0	mobidb-lite (MOBIDB_LITE) | PTHR36782 (PANTHER)	no GO terms	no GO terms
	VvCarFPS02VCR702_v1_PsGc_1018.ver1_0.g006460.m01	VvCarFPS02VCR702_v1_PsGc_1018.ver1_0.g006460	0	iron-sulfur assembly	0	0	0	0	Coil (COILS) | mobidb-lite (MOBIDB_LITE) | PTHR35704 (PANTHER) | PTHR35704:SF1 (PANTHER)	no GO terms	no GO terms
	VvCarFPS02VCR702_v1_PsGc_1018.ver1_0.g006470.m01	VvCarFPS02VCR702_v1_PsGc_1018.ver1_0.g006470	0	PHD finger	F:GO:0005488	F:binding	0	0	IPR003126 (SMART) | IPR003126 (PFAM) | PTHR13513 (PANTHER)	F:GO:0008270	F:zinc ion binding
	VvCarFPS02VCR702_v1_PsGc_1018.ver1_0.g006480.m01	VvCarFPS02VCR702_v1_PsGc_1018.ver1_0.g006480	0	RING-H2 finger ATL21A	C:GO:0016020	C:membrane	0	0	IPR001841 (SMART) | IPR013083 (G3DSA:3.30.40.GENE3D) | IPR001841 (PFAM) | PTHR14155 (PANTHER) | PTHR14155 (PANTHER) | PTHR14155:SF325 (PANTHER) | PTHR14155:SF325 (PANTHER) | PTHR14155 (PANTHER) | IPR001841 (PROSITE_PROFILES) | cd16454 (CDD) | SSF57850 (SUPERFAMILY) | TMhelix (TMHMM)	no GO terms	no GO terms
	VvCarFPS02VCR702_v1_PsGc_1018.ver1_0.g006490.m01	VvCarFPS02VCR702_v1_PsGc_1018.ver1_0.g006490	0	mitochondrial inner membrane OXA1-like	C:GO:0016020 | F:GO:0005215	C:membrane | F:transporter activity	0	0	IPR001708 (PFAM) | IPR028055 (TIGRFAM) | mobidb-lite (MOBIDB_LITE) | PTHR12428:SF25 (PANTHER) | IPR001708 (PANTHER) | PTHR12428:SF25 (PANTHER) | IPR001708 (PANTHER) | TMhelix (TMHMM) | TMhelix (TMHMM) | TMhelix (TMHMM)	F:GO:0032977 | C:GO:0016021	F:membrane insertase activity
	VvCarFPS02VCR702_v1_PsGc_1018.ver1_0.g006500.m01	VvCarFPS02VCR702_v1_PsGc_1018.ver1_0.g006500	0	long chain acyl- synthetase 4-like	F:GO:0003824 | P:GO:0008152	F:catalytic activity | P:metabolic process	0	0	G3DSA:3.40.50.12780 (GENE3D) | IPR000873 (PFAM) | G3DSA:3.40.50.12780 (GENE3D) | PTHR43272:SF9 (PANTHER) | PTHR43272 (PANTHER) | IPR020845 (PROSITE_PATTERNS) | cd05927 (CDD) | SSF56801 (SUPERFAMILY)	F:GO:0003824 | P:GO:0008152	F:catalytic activity
	VvCarFPS02VCR702_v1_PsGc_1018.ver1_0.g006510.m01	VvCarFPS02VCR702_v1_PsGc_1018.ver1_0.g006510	0	leucine-rich repeat family	C:GO:0016020	C:membrane	0	0	IPR006553 (SMART) | IPR032675 (G3DSA:3.80.10.GENE3D) | IPR032675 (G3DSA:3.80.10.GENE3D) | IPR032675 (G3DSA:3.80.10.GENE3D) | mobidb-lite (MOBIDB_LITE) | PTHR44306 (PANTHER) | SSF52047 (SUPERFAMILY)	no GO terms	no GO terms
	VvCarFPS02VCR702_v1_PsGc_1018.ver1_0.g006520.m01	VvCarFPS02VCR702_v1_PsGc_1018.ver1_0.g006520	0	probable phosphatase 2C 8	C:GO:0005623 | P:GO:0006464 | F:GO:0005488 | F:GO:0016787	C:cell | P:cellular protein modification process | F:binding | F:hydrolase activity	EC:3.1.3.16 | EC:3.1.3.41	Protein-serine/threonine phosphatase | 4-nitrophenylphosphatase	IPR001932 (SMART) | IPR001932 (SMART) | IPR001932 (PFAM) | IPR036457 (G3DSA:3.60.40.GENE3D) | mobidb-lite (MOBIDB_LITE) | PTHR13832:SF527 (PANTHER) | IPR015655 (PANTHER) | IPR000222 (PROSITE_PATTERNS) | IPR001932 (PROSITE_PROFILES) | IPR001932 (CDD) | IPR036457 (SUPERFAMILY)	F:GO:0004722 | F:GO:0003824 | P:GO:0006470 | F:GO:0043169	F:protein serine/threonine phosphatase activity	P:protein dephosphorylation	F:cation binding
	VvCarFPS02VCR702_v1_PsGc_1018.ver1_0.g006530.m01	VvCarFPS02VCR702_v1_PsGc_1018.ver1_0.g006530	0	endoglucanase 6-like precursor	P:GO:0005975 | F:GO:0030246 | F:GO:0016787	P:carbohydrate metabolic process | F:carbohydrate binding | F:hydrolase activity	0	0	IPR019028 (SMART) | IPR012341 (G3DSA:1.50.10.GENE3D) | IPR001701 (PFAM) | IPR019028 (PFAM) | PTHR22298:SF19 (PANTHER) | PTHR22298 (PANTHER) | IPR033126 (PROSITE_PATTERNS) | IPR018221 (PROSITE_PATTERNS) | SignalP-TM (SIGNALP_EUK) | IPR008928 (SUPERFAMILY) | TMhelix (TMHMM)	P:GO:0005975 | F:GO:0003824 | F:GO:0030246 | F:GO:0004553	P:carbohydrate metabolic process	F:carbohydrate binding	F:hydrolase activity, hydrolyzing O-glycosyl compounds
	VvCarFPS02VCR702_v1_PsGc_1018.ver1_0.g006540.m01	VvCarFPS02VCR702_v1_PsGc_1018.ver1_0.g006540	0	splicing proline- and glutamine-rich	C:GO:0016020	C:membrane	0	0	mobidb-lite (MOBIDB_LITE) | mobidb-lite (MOBIDB_LITE) | PTHR34200 (PANTHER) | PTHR34200:SF2 (PANTHER) | SignalP-noTM (SIGNALP_EUK) | TMhelix (TMHMM)	no GO terms	no GO terms
	VvCarFPS02VCR702_v1_PsGc_1018.ver1_0.g006550.m01	VvCarFPS02VCR702_v1_PsGc_1018.ver1_0.g006550	0	Ethylene-responsive transcription factor	C:GO:0005634 | F:GO:0003677 | F:GO:0003700 | P:GO:0009058 | P:GO:0006139	C:nucleus | F:DNA binding | F:transcription factor activity, sequence-specific DNA binding | P:biosynthetic process | P:nucleobase-containing compound metabolic process	0	0	IPR001471 (PRINTS) | IPR001471 (SMART) | IPR036955 (G3DSA:3.30.730.GENE3D) | IPR001471 (PFAM) | mobidb-lite (MOBIDB_LITE) | PTHR31657:SF20 (PANTHER) | PTHR31657 (PANTHER) | IPR001471 (PROSITE_PROFILES) | IPR001471 (CDD) | IPR016177 (SUPERFAMILY)	F:GO:0003677 | F:GO:0003700 | P:GO:0006355	F:DNA binding	P:regulation of transcription, DNA-templated
	VvCarFPS02VCR702_v1_PsGc_1018.ver1_0.g006560.m01	VvCarFPS02VCR702_v1_PsGc_1018.ver1_0.g006560	0	DNA primase small subunit	P:GO:0009058 | F:GO:0016740 | P:GO:0006259 | C:GO:0005730	P:biosynthetic process | F:transferase activity | P:DNA metabolic process | C:nucleolus	EC:2.7.7.6	DNA-directed RNA polymerase	Coil (COILS) | G3DSA:3.90.920.30 (GENE3D) | IPR014052 (TIGRFAM) | IPR002755 (PFAM) | mobidb-lite (MOBIDB_LITE) | IPR014052 (PANTHER) | IPR014052 (CDD) | SSF56747 (SUPERFAMILY)	F:GO:0003896 | P:GO:0006269	F:DNA primase activity
	VvCarFPS02VCR702_v1_PsGc_1018.ver1_0.g006570.m01	VvCarFPS02VCR702_v1_PsGc_1018.ver1_0.g006570	0	abscisic acid receptor PYL8-like	C:GO:0005737	C:cytoplasm	0	0	IPR019587 (PFAM) | IPR023393 (G3DSA:3.30.530.GENE3D) | PTHR31213:SF4 (PANTHER) | PTHR31213 (PANTHER) | cd07821 (CDD) | SSF55961 (SUPERFAMILY)	no GO terms	no GO terms
	VvCarFPS02VCR702_v1_PsGc_1018.ver1_0.g006580.m01	VvCarFPS02VCR702_v1_PsGc_1018.ver1_0.g006580	0	polygalacturonase glycoside hydrolase family	P:GO:0005975 | P:GO:0044763 | P:GO:0009987 | F:GO:0016787 | P:GO:0044723	P:carbohydrate metabolic process | P:single-organism cellular process | P:cellular process | F:hydrolase activity | P:single-organism carbohydrate metabolic process	EC:3.2.1.15	Polygalacturonase	IPR000743 (PFAM) | IPR012334 (G3DSA:2.160.20.GENE3D) | PTHR31339 (PANTHER) | PTHR31339:SF3 (PANTHER) | IPR011050 (SUPERFAMILY) | TMhelix (TMHMM)	P:GO:0005975 | F:GO:0004650	P:carbohydrate metabolic process
	VvCarFPS02VCR702_v1_PsGc_1018.ver1_0.g006590.m01	VvCarFPS02VCR702_v1_PsGc_1018.ver1_0.g006590	0	polygalacturonase glycoside hydrolase family	0	0	0	0	mobidb-lite (MOBIDB_LITE) | PTHR31339 (PANTHER) | PTHR31339:SF3 (PANTHER)	no GO terms	no GO terms
	VvCarFPS02VCR702_v1_PsGc_1018.ver1_0.g006600.m01	VvCarFPS02VCR702_v1_PsGc_1018.ver1_0.g006600	0	hypothetical protein L484_000045	0	0	0	0	mobidb-lite (MOBIDB_LITE)	no GO terms	no GO terms
	VvCarFPS02VCR702_v1_PsGc_1018.ver1_0.g006610.m01	VvCarFPS02VCR702_v1_PsGc_1018.ver1_0.g006610	0	hypothetical protein POPTR_0003s13870g	0	0	0	0	no IPS match	no IPS match	no IPS match
	VvCarFPS02VCR702_v1_PsGc_1018.ver1_0.g006620.m01	VvCarFPS02VCR702_v1_PsGc_1018.ver1_0.g006620	0	probable inactive receptor kinase At1g48480	F:GO:0000166 | P:GO:0006464 | F:GO:0016301	F:nucleotide binding | P:cellular protein modification process | F:kinase activity	0	0	G3DSA:1.10.510.10 (GENE3D) | PTHR27008 (PANTHER) | PTHR27008:SF25 (PANTHER) | IPR000719 (PROSITE_PROFILES) | IPR011009 (SUPERFAMILY)	F:GO:0005524 | F:GO:0004672 | P:GO:0006468	F:ATP binding	P:protein phosphorylation
	VvCarFPS02VCR702_v1_PsGc_1018.ver1_0.g006630.m01	VvCarFPS02VCR702_v1_PsGc_1018.ver1_0.g006630	0	subtilisin-like protease	F:GO:0016787	F:hydrolase activity	0	0	IPR010259 (PFAM) | PTHR37379 (PANTHER)	no GO terms	no GO terms
	VvCarFPS02VCR702_v1_PsGc_1018.ver1_0.g006640.m01	VvCarFPS02VCR702_v1_PsGc_1018.ver1_0.g006640	0	alpha beta-Hydrolases superfamily	F:GO:0016787	F:hydrolase activity	0	0	IPR029058 (G3DSA:3.40.50.GENE3D) | IPR029059 (PFAM) | PTHR13136:SF9 (PANTHER) | IPR026555 (PANTHER) | IPR029058 (SUPERFAMILY)	no GO terms	no GO terms
	VvCarFPS02VCR702_v1_PsGc_1018.ver1_0.g006650.m01	VvCarFPS02VCR702_v1_PsGc_1018.ver1_0.g006650	0	probable WRKY transcription factor 41	F:GO:0003677 | F:GO:0003700 | P:GO:0009058 | P:GO:0006139 | C:GO:0005622	F:DNA binding | F:transcription factor activity, sequence-specific DNA binding | P:biosynthetic process | P:nucleobase-containing compound metabolic process | C:intracellular	0	0	IPR003657 (SMART) | IPR036576 (G3DSA:2.20.25.GENE3D) | IPR003657 (PFAM) | mobidb-lite (MOBIDB_LITE) | mobidb-lite (MOBIDB_LITE) | PTHR31282:SF26 (PANTHER) | PTHR31282 (PANTHER) | IPR003657 (PROSITE_PROFILES) | IPR036576 (SUPERFAMILY)	F:GO:0003700 | P:GO:0006355 | F:GO:0043565	F:transcription factor activity, sequence-specific DNA binding	F:sequence-specific DNA binding
	VvCarFPS02VCR702_v1_PsGc_1018.ver1_0.g006660.m01	VvCarFPS02VCR702_v1_PsGc_1018.ver1_0.g006660	0	1-acyl-sn-glycerol-3-phosphate acyltransferase	C:GO:0016020	C:membrane	0	0	IPR021995 (PFAM) | PTHR35473:SF2 (PANTHER) | IPR021995 (PANTHER) | TMhelix (TMHMM) | TMhelix (TMHMM) | TMhelix (TMHMM)	no GO terms	no GO terms
	VvCarFPS02VCR702_v1_PsGc_1018.ver1_0.g006670.m01	VvCarFPS02VCR702_v1_PsGc_1018.ver1_0.g006670	0	dihydroflavonol-4-reductase	F:GO:0003824 | F:GO:0005488	F:catalytic activity | F:binding	0	0	G3DSA:3.40.50.720 (GENE3D) | IPR001509 (PFAM) | PTHR10366:SF550 (PANTHER) | PTHR10366 (PANTHER) | cd08958 (CDD) | IPR036291 (SUPERFAMILY)	F:GO:0050662 | F:GO:0003824	F:coenzyme binding
	VvCarFPS02VCR702_v1_PsGc_1018.ver1_0.g006680.m01	VvCarFPS02VCR702_v1_PsGc_1018.ver1_0.g006680	0	transport SEC13 homolog B-like	C:GO:0005635 | F:GO:0005515 | P:GO:0007165 | F:GO:0005198	C:nuclear envelope | F:protein binding | P:signal transduction | F:structural molecule activity	0	0	IPR001680 (SMART) | IPR015943 (G3DSA:2.130.10.GENE3D) | IPR001680 (PFAM) | IPR037363 (PANTHER) | IPR037597 (PTHR11024:PANTHER) | IPR001680 (PROSITE_PROFILES) | IPR017986 (PROSITE_PROFILES) | IPR017986 (PROSITE_PROFILES) | IPR036322 (SUPERFAMILY)	P:GO:1904263 | F:GO:0005515 | F:GO:0005198	P:positive regulation of TORC1 signaling	F:structural molecule activity
	VvCarFPS02VCR702_v1_PsGc_1018.ver1_0.g006690.m01	VvCarFPS02VCR702_v1_PsGc_1018.ver1_0.g006690	0	hydroquinone glucosyltransferase	P:GO:0008152 | F:GO:0016740 | C:GO:0005622	P:metabolic process | F:transferase activity | C:intracellular	0	0	G3DSA:3.40.50.2000 (GENE3D) | G3DSA:3.40.50.2000 (GENE3D) | IPR002213 (PFAM) | PTHR11926 (PANTHER) | PTHR11926:SF687 (PANTHER) | IPR035595 (PROSITE_PATTERNS) | SSF53756 (SUPERFAMILY)	F:GO:0016758 | P:GO:0008152	F:transferase activity, transferring hexosyl groups
	VvCarFPS02VCR702_v1_PsGc_1018.ver1_0.g006700.m01	VvCarFPS02VCR702_v1_PsGc_1018.ver1_0.g006700	0	plant K16L22-9	C:GO:0016020	C:membrane	0	0	mobidb-lite (MOBIDB_LITE) | PTHR33978:SF4 (PANTHER) | PTHR33978 (PANTHER)	no GO terms	no GO terms
	VvCarFPS02VCR702_v1_PsGc_1018.ver1_0.g006710.m01	VvCarFPS02VCR702_v1_PsGc_1018.ver1_0.g006710	0	transmembrane amino acid transporter family	C:GO:0016020	C:membrane	0	0	IPR013057 (PFAM) | PTHR22950 (PANTHER) | PTHR22950:SF229 (PANTHER) | PTHR22950:SF229 (PANTHER) | TMhelix (TMHMM) | TMhelix (TMHMM) | TMhelix (TMHMM) | TMhelix (TMHMM) | TMhelix (TMHMM) | TMhelix (TMHMM) | TMhelix (TMHMM) | TMhelix (TMHMM)	no GO terms	no GO terms
	VvCarFPS02VCR702_v1_PsGc_1018.ver1_0.g006720.m01	VvCarFPS02VCR702_v1_PsGc_1018.ver1_0.g006720	0	high mobility group B1	C:GO:0005634	C:nucleus	0	0	Coil (COILS) | Coil (COILS) | Coil (COILS) | Coil (COILS) | IPR009071 (SMART) | IPR009071 (PFAM) | IPR036910 (G3DSA:1.10.30.GENE3D) | mobidb-lite (MOBIDB_LITE) | PTHR13711 (PANTHER) | PTHR13711:SF233 (PANTHER) | PTHR13711 (PANTHER) | PTHR13711:SF233 (PANTHER) | IPR009071 (PROSITE_PROFILES) | IPR009071 (PROSITE_PROFILES) | cd01390 (CDD) | cd01390 (CDD) | IPR036910 (SUPERFAMILY) | IPR036910 (SUPERF…	no GO terms	no GO terms
	VvCarFPS02VCR702_v1_PsGc_1018.ver1_0.g006730.m01	VvCarFPS02VCR702_v1_PsGc_1018.ver1_0.g006730	0	trichome birefringence-like 26	C:GO:0005794	C:Golgi apparatus	0	0	IPR026057 (PFAM) | IPR025846 (PFAM) | IPR029962 (PANTHER) | PTHR32285:SF40 (PANTHER) | TMhelix (TMHMM)	no GO terms	no GO terms
	VvCarFPS02VCR702_v1_PsGc_1018.ver1_0.g006740.m01	VvCarFPS02VCR702_v1_PsGc_1018.ver1_0.g006740	0	extra-large G (DUF3133)	0	0	0	0	Coil (COILS) | IPR021480 (PFAM) | mobidb-lite (MOBIDB_LITE) | mobidb-lite (MOBIDB_LITE) | mobidb-lite (MOBIDB_LITE) | mobidb-lite (MOBIDB_LITE) | mobidb-lite (MOBIDB_LITE) | PTHR31105:SF3 (PANTHER) | PTHR31105 (PANTHER)	no GO terms	no GO terms
	VvCarFPS02VCR702_v1_PsGc_1018.ver1_0.g006750.m01	VvCarFPS02VCR702_v1_PsGc_1018.ver1_0.g006750	0	glycosyltransferase family 28	0	0	0	0	PTHR33978 (PANTHER) | PTHR33978:SF2 (PANTHER)	no GO terms	no GO terms
	VvCarFPS02VCR702_v1_PsGc_1018.ver1_0.g006760.m01	VvCarFPS02VCR702_v1_PsGc_1018.ver1_0.g006760	0	mitochondrial adenine nucleotide transporter ADNT1-like	C:GO:0016020 | P:GO:0006810	C:membrane | P:transport	0	0	IPR002067 (PRINTS) | IPR023395 (G3DSA:1.50.40.GENE3D) | IPR018108 (PFAM) | PTHR24089 (PANTHER) | PTHR24089:SF648 (PANTHER) | IPR018108 (PROSITE_PROFILES) | IPR018108 (PROSITE_PROFILES) | IPR018108 (PROSITE_PROFILES) | IPR023395 (SUPERFAMILY)	P:GO:0055085	P:transmembrane transport
	VvCarFPS02VCR702_v1_PsGc_1018.ver1_0.g006770.m01	VvCarFPS02VCR702_v1_PsGc_1018.ver1_0.g006770	0	myosin heavy chain	F:GO:0005515	F:protein binding	0	0	Coil (COILS) | Coil (COILS) | Coil (COILS) | Coil (COILS) | Coil (COILS) | Coil (COILS) | Coil (COILS) | Coil (COILS) | Coil (COILS) | Coil (COILS) | Coil (COILS) | Coil (COILS) | Coil (COILS) | Coil (COILS) | Coil (COILS) | Coil (COILS) | Coil (COILS) | Coil (COILS) | IPR011684 (PFAM) | mobidb-lite (MOBIDB_LITE) | PTHR13140:SF664 (PANTHER) | PTHR13140 (PANTHER) | PTHR13140:SF664 (PANTHER) | PTHR…	F:GO:0003779	F:actin binding
	VvCarFPS02VCR702_v1_PsGc_1018.ver1_0.g006780.m01	VvCarFPS02VCR702_v1_PsGc_1018.ver1_0.g006780	0	myosin heavy chain	F:GO:0005515	F:protein binding	0	0	Coil (COILS) | Coil (COILS) | Coil (COILS) | Coil (COILS) | Coil (COILS) | Coil (COILS) | IPR011684 (PFAM) | mobidb-lite (MOBIDB_LITE) | PTHR13140 (PANTHER) | PTHR13140 (PANTHER) | PTHR13140:SF664 (PANTHER) | PTHR13140:SF664 (PANTHER) | PTHR13140:SF664 (PANTHER) | PTHR13140 (PANTHER) | IPR011684 (PROSITE_PROFILES)	F:GO:0003779	F:actin binding
	VvCarFPS02VCR702_v1_PsGc_1018.ver1_0.g006790.m01	VvCarFPS02VCR702_v1_PsGc_1018.ver1_0.g006790	0	crooked neck cell cycle	F:GO:0005515 | P:GO:0006139	F:protein binding | P:nucleobase-containing compound metabolic process	0	0	IPR003107 (SMART) | IPR003107 (PFAM) | IPR011990 (G3DSA:1.25.40.GENE3D) | PTHR11246:SF3 (PANTHER) | PTHR11246 (PANTHER) | IPR011990 (SUPERFAMILY)	F:GO:0005515 | P:GO:0006396	F:protein binding
	VvCarFPS02VCR702_v1_PsGc_1018.ver1_0.g006800.m01	VvCarFPS02VCR702_v1_PsGc_1018.ver1_0.g006800	0	crooked neck 1	F:GO:0005515 | P:GO:0006139	F:protein binding | P:nucleobase-containing compound metabolic process	0	0	IPR003107 (SMART) | IPR003107 (PFAM) | IPR011990 (G3DSA:1.25.40.GENE3D) | mobidb-lite (MOBIDB_LITE) | PTHR11246 (PANTHER) | PTHR11246:SF3 (PANTHER) | IPR013026 (PROSITE_PROFILES) | IPR013026 (PROSITE_PROFILES) | IPR011990 (SUPERFAMILY) | IPR011990 (SUPERFAMILY)	F:GO:0005515 | P:GO:0006396	F:protein binding
	VvCarFPS02VCR702_v1_PsGc_1018.ver1_0.g006810.m01	VvCarFPS02VCR702_v1_PsGc_1018.ver1_0.g006810	0	DNA ligase 1-like	0	0	0	0	Coil (COILS) | Coil (COILS) | mobidb-lite (MOBIDB_LITE) | mobidb-lite (MOBIDB_LITE) | mobidb-lite (MOBIDB_LITE) | PTHR34380:SF1 (PANTHER) | PTHR34380 (PANTHER)	no GO terms	no GO terms
	VvCarFPS02VCR702_v1_PsGc_1018.ver1_0.g006820.m01	VvCarFPS02VCR702_v1_PsGc_1018.ver1_0.g006820	0	DNA ligase 1-like	0	0	0	0	Coil (COILS) | Coil (COILS) | mobidb-lite (MOBIDB_LITE) | PTHR34380 (PANTHER) | PTHR34380:SF1 (PANTHER) | PTHR34380 (PANTHER) | PTHR34380:SF1 (PANTHER)	no GO terms	no GO terms
	VvCarFPS02VCR702_v1_PsGc_1018.ver1_0.g006830.m01	VvCarFPS02VCR702_v1_PsGc_1018.ver1_0.g006830	0	ubiquitin ligase	F:GO:0000166 | F:GO:0005515	F:nucleotide binding | F:protein binding	0	0	Coil (COILS) | IPR020472 (PRINTS) | IPR001680 (SMART) | IPR015943 (G3DSA:2.130.10.GENE3D) | IPR001680 (PFAM) | mobidb-lite (MOBIDB_LITE) | mobidb-lite (MOBIDB_LITE) | mobidb-lite (MOBIDB_LITE) | PTHR44218 (PANTHER) | PTHR44218:SF2 (PANTHER) | IPR019775 (PROSITE_PATTERNS) | IPR019775 (PROSITE_PATTERNS) | IPR001680 (PROSITE_PROFILES) | IPR001680 (PROSITE_PROFILES) | IPR001680 (PROSITE_PROFILES) | I…	F:GO:0005515	F:protein binding
	VvCarFPS02VCR702_v1_PsGc_1018.ver1_0.g006840.m01	VvCarFPS02VCR702_v1_PsGc_1018.ver1_0.g006840	0	kinase family	F:GO:0000166 | P:GO:0006464 | F:GO:0016301	F:nucleotide binding | P:cellular protein modification process | F:kinase activity	0	0	G3DSA:1.10.510.10 (GENE3D) | PIRSF000615 (PIRSF) | IPR010632 (PFAM) | IPR001245 (PFAM) | PTHR44630:SF3 (PANTHER) | PTHR44630 (PANTHER) | IPR000719 (PROSITE_PROFILES) | IPR011009 (SUPERFAMILY)	F:GO:0005524 | F:GO:0004672 | P:GO:0006468	F:ATP binding	P:protein phosphorylation
	VvCarFPS02VCR702_v1_PsGc_1018.ver1_0.g006850.m01	VvCarFPS02VCR702_v1_PsGc_1018.ver1_0.g006850	0	cytoplasmic tRNA 2-thiolation	P:GO:0009719 | P:GO:0009987	P:response to endogenous stimulus | P:cellular process	0	0	mobidb-lite (MOBIDB_LITE) | PTHR33513:SF1 (PANTHER) | PTHR33513 (PANTHER)	no GO terms	no GO terms
	VvCarFPS02VCR702_v1_PsGc_1018.ver1_0.g006860.m01	VvCarFPS02VCR702_v1_PsGc_1018.ver1_0.g006860	0	arabinogalactan peptide 22-like	C:GO:0016020	C:membrane	0	0	IPR009424 (PFAM) | PTHR33374 (PANTHER) | PTHR33374:SF9 (PANTHER) | SignalP-TM (SIGNALP_GRAM_POSITIVE) | SignalP-TM (SIGNALP_EUK) | TMhelix (TMHMM) | TMhelix (TMHMM)	no GO terms	no GO terms
	VvCarFPS02VCR702_v1_PsGc_1018.ver1_0.g006870.m01	VvCarFPS02VCR702_v1_PsGc_1018.ver1_0.g006870	0	pectin acetylesterase 12-like	0	0	0	0	PTHR37750 (PANTHER) | IPR009069 (SUPERFAMILY)	no GO terms	no GO terms
	VvCarFPS02VCR702_v1_PsGc_1018.ver1_0.g006880.m01	VvCarFPS02VCR702_v1_PsGc_1018.ver1_0.g006880	0	plastocyanin-like domain	C:GO:0005886 | F:GO:0003674	C:plasma membrane | F:molecular_function	0	0	IPR008972 (G3DSA:2.60.40.GENE3D) | IPR003245 (PFAM) | PTHR33021 (PANTHER) | PTHR33021:SF22 (PANTHER) | IPR028871 (PROSITE_PATTERNS) | IPR003245 (PRODOM) | IPR003245 (PROSITE_PROFILES) | cd13920 (CDD) | SignalP-noTM (SIGNALP_GRAM_NEGATIVE) | SignalP-TM (SIGNALP_GRAM_POSITIVE) | SignalP-noTM (SIGNALP_EUK) | IPR008972 (SUPERFAMILY)	F:GO:0009055	F:electron carrier activity
	VvCarFPS02VCR702_v1_PsGc_1018.ver1_0.g006890.m01	VvCarFPS02VCR702_v1_PsGc_1018.ver1_0.g006890	0	ethylene-responsive transcription factor CRF4	C:GO:0005634 | F:GO:0003677 | F:GO:0003700 | P:GO:0009058 | P:GO:0006139	C:nucleus | F:DNA binding | F:transcription factor activity, sequence-specific DNA binding | P:biosynthetic process | P:nucleobase-containing compound metabolic process	0	0	IPR001471 (PRINTS) | IPR001471 (SMART) | IPR036955 (G3DSA:3.30.730.GENE3D) | IPR001471 (PFAM) | mobidb-lite (MOBIDB_LITE) | PTHR31194:SF40 (PANTHER) | PTHR31194 (PANTHER) | IPR001471 (PROSITE_PROFILES) | IPR001471 (CDD) | IPR016177 (SUPERFAMILY)	F:GO:0003677 | F:GO:0003700 | P:GO:0006355	F:DNA binding	P:regulation of transcription, DNA-templated
	VvCarFPS02VCR702_v1_PsGc_1018.ver1_0.g006900.m01	VvCarFPS02VCR702_v1_PsGc_1018.ver1_0.g006900	0	Ubiquitin-conjugating enzyme E2 10	F:GO:0000166	F:nucleotide binding	0	0	SM00212 (SMART) | IPR000608 (PFAM) | IPR016135 (G3DSA:3.10.110.GENE3D) | PTHR24068:SF68 (PANTHER) | PTHR24068 (PANTHER) | IPR023313 (PROSITE_PATTERNS) | IPR000608 (PROSITE_PROFILES) | IPR000608 (CDD) | IPR016135 (SUPERFAMILY)	no GO terms	no GO terms
	VvCarFPS02VCR702_v1_PsGc_1018.ver1_0.g006910.m01	VvCarFPS02VCR702_v1_PsGc_1018.ver1_0.g006910	0	probable inactive receptor kinase At4g23740	F:GO:0000166 | F:GO:0005515 | C:GO:0016020 | P:GO:0006464 | F:GO:0016301	F:nucleotide binding | F:protein binding | C:membrane | P:cellular protein modification process | F:kinase activity	0	0	G3DSA:1.10.510.10 (GENE3D) | IPR013210 (PFAM) | G3DSA:3.30.200.20 (GENE3D) | IPR032675 (G3DSA:3.80.10.GENE3D) | IPR032675 (G3DSA:3.80.10.GENE3D) | IPR001611 (PFAM) | IPR000719 (PFAM) | IPR001611 (PFAM) | mobidb-lite (MOBIDB_LITE) | PTHR27008:SF15 (PANTHER) | PTHR27008 (PANTHER) | IPR017441 (PROSITE_PATTERNS) | IPR000719 (PROSITE_PROFILES) | IPR001611 (PROSITE_PROFILES) | IPR001611 (PROSITE_PROFIL…	F:GO:0005524 | F:GO:0005515 | F:GO:0004672 | P:GO:0006468	F:ATP binding	F:protein kinase activity	P:protein phosphorylation
	VvCarFPS02VCR702_v1_PsGc_1018.ver1_0.g006920.m01	VvCarFPS02VCR702_v1_PsGc_1018.ver1_0.g006920	0	glucose-6-phosphate 1-epimerase	P:GO:0005975 | F:GO:0003824 | F:GO:0030246	P:carbohydrate metabolic process | F:catalytic activity | F:carbohydrate binding	0	0	IPR008183 (PFAM) | IPR014718 (G3DSA:2.70.98.GENE3D) | IPR025532 (PIRSF) | PTHR11122:SF10 (PANTHER) | PTHR11122 (PANTHER) | IPR025532 (CDD) | IPR011013 (SUPERFAMILY)	P:GO:0005975 | F:GO:0003824 | F:GO:0030246 | F:GO:0016853	P:carbohydrate metabolic process	F:carbohydrate binding	F:isomerase activity
	VvCarFPS02VCR702_v1_PsGc_1018.ver1_0.g006930.m01	VvCarFPS02VCR702_v1_PsGc_1018.ver1_0.g006930	0	G-box binding factor 3	F:GO:0003677 | F:GO:0003700 | P:GO:0009058 | P:GO:0006139 | C:GO:0005622	F:DNA binding | F:transcription factor activity, sequence-specific DNA binding | P:biosynthetic process | P:nucleobase-containing compound metabolic process | C:intracellular	0	0	Coil (COILS) | IPR004827 (SMART) | G3DSA:1.20.5.170 (GENE3D) | IPR012900 (PFAM) | IPR004827 (PFAM) | PF16596 (PFAM) | mobidb-lite (MOBIDB_LITE) | mobidb-lite (MOBIDB_LITE) | PTHR22952:SF230 (PANTHER) | PTHR22952 (PANTHER) | IPR004827 (PROSITE_PATTERNS) | IPR004827 (PROSITE_PROFILES) | cd14702 (CDD) | SSF57959 (SUPERFAMILY)	F:GO:0003700 | P:GO:0006355	F:transcription factor activity, sequence-specific DNA binding
	VvCarFPS02VCR702_v1_PsGc_1018.ver1_0.g006940.m01	VvCarFPS02VCR702_v1_PsGc_1018.ver1_0.g006940	0	galactosyltransferase family	C:GO:0005737 | C:GO:0016020 | P:GO:0006464 | C:GO:0005794 | P:GO:0009058 | F:GO:0016740	C:cytoplasm | C:membrane | P:cellular protein modification process | C:Golgi apparatus | P:biosynthetic process | F:transferase activity	0	0	Coil (COILS) | G3DSA:3.90.550.50 (GENE3D) | IPR025298 (PFAM) | IPR002659 (PFAM) | IPR002659 (PANTHER) | PTHR11214:SF224 (PANTHER) | TMhelix (TMHMM)	C:GO:0016020 | P:GO:0006486 | F:GO:0008378	C:membrane	F:galactosyltransferase activity
	VvCarFPS02VCR702_v1_PsGc_1018.ver1_0.g006950.m01	VvCarFPS02VCR702_v1_PsGc_1018.ver1_0.g006950	0	V-type proton ATPase subunit E-like	P:GO:0006091 | C:GO:0016020 | P:GO:0044765 | P:GO:0006810 | P:GO:0006139 | F:GO:0005215 | F:GO:0016787	P:generation of precursor metabolites and energy | C:membrane | P:single-organism transport | P:transport | P:nucleobase-containing compound metabolic process | F:transporter activity | F:hydrolase activity	EC:3.6.1.3 | EC:3.6.1.15	Adenosinetriphosphatase | Nucleoside-triphosphate phosphatase	Coil (COILS) | IPR038495 (G3DSA:3.30.2320.GENE3D) | IPR002842 (PFAM) | PTHR12317:SF54 (PANTHER) | PTHR12317 (PANTHER) | IPR002842 (HAMAP) | SSF160527 (SUPERFAMILY)	P:GO:0015991 | F:GO:0046961 | C:GO:0033178	P:ATP hydrolysis coupled proton transport	C:proton-transporting two-sector ATPase complex, catalytic domain
	VvCarFPS02VCR702_v1_PsGc_1018.ver1_0.g006960.m01	VvCarFPS02VCR702_v1_PsGc_1018.ver1_0.g006960	0	ABC transporter C family member 10-like	F:GO:0000166 | C:GO:0016020 | P:GO:0006810 | F:GO:0005215 | F:GO:0016787	F:nucleotide binding | C:membrane | P:transport | F:transporter activity | F:hydrolase activity	EC:3.6.1.3 | EC:3.6.1.15	Adenosinetriphosphatase | Nucleoside-triphosphate phosphatase	IPR003593 (SMART) | G3DSA:3.40.50.300 (GENE3D) | G3DSA:3.40.50.300 (GENE3D) | IPR011527 (PFAM) | IPR003439 (PFAM) | IPR036640 (G3DSA:1.20.1560.GENE3D) | PTHR24223 (PANTHER) | PTHR24223:SF263 (PANTHER) | IPR017871 (PROSITE_PATTERNS) | IPR003439 (PROSITE_PROFILES) | IPR003439 (PROSITE_PROFILES) | IPR011527 (PROSITE_PROFILES) | IPR011527 (PROSITE_PROFILES) | cd03244 (CDD) | cd03250 (CDD) | IPR036640…	F:GO:0016887 | F:GO:0005524 | F:GO:0042626 | P:GO:0055085 | C:GO:0016021	F:ATPase activity	F:ATPase activity, coupled to transmembrane movement of substances	P:transmembrane transport	C:integral component of membrane
	VvCarFPS02VCR702_v1_PsGc_1018.ver1_0.g006970.m01	VvCarFPS02VCR702_v1_PsGc_1018.ver1_0.g006970	0	ABC transporter C family member 10-like	F:GO:0000166 | C:GO:0016020 | P:GO:0006810 | F:GO:0005215 | F:GO:0016787	F:nucleotide binding | C:membrane | P:transport | F:transporter activity | F:hydrolase activity	EC:3.6.1.3 | EC:3.6.1.15	Adenosinetriphosphatase | Nucleoside-triphosphate phosphatase	IPR003593 (SMART) | G3DSA:3.40.50.300 (GENE3D) | G3DSA:3.40.50.300 (GENE3D) | IPR003439 (PFAM) | IPR011527 (PFAM) | IPR036640 (G3DSA:1.20.1560.GENE3D) | PTHR24223 (PANTHER) | PTHR24223:SF263 (PANTHER) | IPR017871 (PROSITE_PATTERNS) | IPR011527 (PROSITE_PROFILES) | IPR003439 (PROSITE_PROFILES) | IPR011527 (PROSITE_PROFILES) | IPR003439 (PROSITE_PROFILES) | cd03244 (CDD) | cd03250 (CDD) | IPR036640…	F:GO:0016887 | F:GO:0005524 | F:GO:0042626 | P:GO:0055085 | C:GO:0016021	F:ATPase activity	F:ATPase activity, coupled to transmembrane movement of substances	P:transmembrane transport	C:integral component of membrane
	VvCarFPS02VCR702_v1_PsGc_1018.ver1_0.g006980.m01	VvCarFPS02VCR702_v1_PsGc_1018.ver1_0.g006980	0	high mobility group B1	C:GO:0005634	C:nucleus	0	0	Coil (COILS) | Coil (COILS) | Coil (COILS) | IPR009071 (SMART) | IPR009071 (PFAM) | IPR036910 (G3DSA:1.10.30.GENE3D) | mobidb-lite (MOBIDB_LITE) | PTHR13711 (PANTHER) | PTHR13711:SF233 (PANTHER) | IPR009071 (PROSITE_PROFILES) | cd01390 (CDD) | IPR036910 (SUPERFAMILY)	no GO terms	no GO terms
	VvCarFPS02VCR702_v1_PsGc_1018.ver1_0.g006990.m01	VvCarFPS02VCR702_v1_PsGc_1018.ver1_0.g006990	0	ABC transporter C family member 10-like	F:GO:0000166 | C:GO:0016020 | P:GO:0006810 | F:GO:0005215 | F:GO:0016787	F:nucleotide binding | C:membrane | P:transport | F:transporter activity | F:hydrolase activity	EC:3.6.1.3 | EC:3.6.1.15	Adenosinetriphosphatase | Nucleoside-triphosphate phosphatase	IPR036640 (G3DSA:1.20.1560.GENE3D) | PTHR24223 (PANTHER) | PTHR24223:SF263 (PANTHER) | IPR011527 (PROSITE_PROFILES) | IPR036640 (SUPERFAMILY) | TMhelix (TMHMM)	F:GO:0005524 | F:GO:0042626 | P:GO:0055085 | C:GO:0016021	F:ATP binding	P:transmembrane transport	C:integral component of membrane
	VvCarFPS02VCR702_v1_PsGc_1018.ver1_0.g007000.m01	VvCarFPS02VCR702_v1_PsGc_1018.ver1_0.g007000	0	ABC transporter C family member 10-like	F:GO:0000166 | F:GO:0016787	F:nucleotide binding | F:hydrolase activity	EC:3.6.1.3 | EC:3.6.1.15	Adenosinetriphosphatase | Nucleoside-triphosphate phosphatase	IPR003593 (SMART) | G3DSA:3.40.50.300 (GENE3D) | IPR003439 (PFAM) | PTHR24223:SF263 (PANTHER) | PTHR24223 (PANTHER) | IPR017871 (PROSITE_PATTERNS) | IPR003439 (PROSITE_PROFILES) | cd03250 (CDD) | IPR027417 (SUPERFAMILY)	F:GO:0016887 | F:GO:0005524	F:ATPase activity
	VvCarFPS02VCR702_v1_PsGc_1018.ver1_0.g007010.m01	VvCarFPS02VCR702_v1_PsGc_1018.ver1_0.g007010	0	ABC transporter C family member 10-like	F:GO:0000166 | C:GO:0016020 | P:GO:0006810 | F:GO:0005215 | F:GO:0016787	F:nucleotide binding | C:membrane | P:transport | F:transporter activity | F:hydrolase activity	EC:3.6.1.3 | EC:3.6.1.15	Adenosinetriphosphatase | Nucleoside-triphosphate phosphatase	IPR003593 (SMART) | IPR003439 (PFAM) | IPR036640 (G3DSA:1.20.1560.GENE3D) | IPR011527 (PFAM) | G3DSA:3.40.50.300 (GENE3D) | PTHR24223 (PANTHER) | PTHR24223:SF263 (PANTHER) | IPR003439 (PROSITE_PROFILES) | IPR011527 (PROSITE_PROFILES) | cd03244 (CDD) | IPR027417 (SUPERFAMILY) | IPR036640 (SUPERFAMILY) | TMhelix (TMHMM) | TMhelix (TMHMM) | TMhelix (TMHMM)	F:GO:0016887 | F:GO:0005524 | F:GO:0042626 | P:GO:0055085 | C:GO:0016021	F:ATPase activity	F:ATPase activity, coupled to transmembrane movement of substances	P:transmembrane transport	C:integral component of membrane
	VvCarFPS02VCR702_v1_PsGc_1018.ver1_0.g007020.m01	VvCarFPS02VCR702_v1_PsGc_1018.ver1_0.g007020	0	Pentatricopeptide repeat (PPR) superfamily	0	0	0	0	no IPS match	no IPS match	no IPS match
	VvCarFPS02VCR702_v1_PsGc_1018.ver1_0.g007030.m01	VvCarFPS02VCR702_v1_PsGc_1018.ver1_0.g007030	0	ABC transporter C family member 10-like	F:GO:0000166 | C:GO:0016020 | P:GO:0006810 | F:GO:0005215 | F:GO:0016787	F:nucleotide binding | C:membrane | P:transport | F:transporter activity | F:hydrolase activity	EC:3.6.1.3 | EC:3.6.1.15	Adenosinetriphosphatase | Nucleoside-triphosphate phosphatase	IPR003593 (SMART) | G3DSA:3.40.50.300 (GENE3D) | IPR003439 (PFAM) | G3DSA:3.40.50.300 (GENE3D) | IPR036640 (G3DSA:1.20.1560.GENE3D) | IPR011527 (PFAM) | PTHR24223 (PANTHER) | PTHR24223:SF263 (PANTHER) | IPR017871 (PROSITE_PATTERNS) | IPR003439 (PROSITE_PROFILES) | IPR011527 (PROSITE_PROFILES) | IPR003439 (PROSITE_PROFILES) | IPR011527 (PROSITE_PROFILES) | cd03244 (CDD) | cd03250 (CDD) | IPR027417…	F:GO:0016887 | F:GO:0005524 | F:GO:0042626 | P:GO:0055085 | C:GO:0016021	F:ATPase activity	F:ATPase activity, coupled to transmembrane movement of substances	P:transmembrane transport	C:integral component of membrane
	VvCarFPS02VCR702_v1_PsGc_1018.ver1_0.g007040.m01	VvCarFPS02VCR702_v1_PsGc_1018.ver1_0.g007040	0	ABC transporter C family member 10-like	F:GO:0000166 | C:GO:0016020 | P:GO:0006810 | F:GO:0005215 | F:GO:0016787	F:nucleotide binding | C:membrane | P:transport | F:transporter activity | F:hydrolase activity	EC:3.6.1.3 | EC:3.6.1.15	Adenosinetriphosphatase | Nucleoside-triphosphate phosphatase	IPR003593 (SMART) | IPR003439 (PFAM) | IPR011527 (PFAM) | G3DSA:3.40.50.300 (GENE3D) | G3DSA:3.40.50.300 (GENE3D) | IPR036640 (G3DSA:1.20.1560.GENE3D) | PTHR24223 (PANTHER) | PTHR24223:SF263 (PANTHER) | IPR017871 (PROSITE_PATTERNS) | IPR003439 (PROSITE_PROFILES) | IPR003439 (PROSITE_PROFILES) | IPR011527 (PROSITE_PROFILES) | IPR011527 (PROSITE_PROFILES) | cd03250 (CDD) | cd03244 (CDD) | IPR036640…	F:GO:0016887 | F:GO:0005524 | F:GO:0042626 | P:GO:0055085 | C:GO:0016021	F:ATPase activity	F:ATPase activity, coupled to transmembrane movement of substances	P:transmembrane transport	C:integral component of membrane
	VvCarFPS02VCR702_v1_PsGc_1018.ver1_0.g007050.m01	VvCarFPS02VCR702_v1_PsGc_1018.ver1_0.g007050	0	ABC transporter C family member 10-like	F:GO:0000166 | C:GO:0016020 | P:GO:0006810 | F:GO:0005215 | F:GO:0016787	F:nucleotide binding | C:membrane | P:transport | F:transporter activity | F:hydrolase activity	EC:3.6.1.3 | EC:3.6.1.15	Adenosinetriphosphatase | Nucleoside-triphosphate phosphatase	IPR003593 (SMART) | IPR036640 (G3DSA:1.20.1560.GENE3D) | G3DSA:3.40.50.300 (GENE3D) | IPR011527 (PFAM) | IPR003439 (PFAM) | G3DSA:3.40.50.300 (GENE3D) | mobidb-lite (MOBIDB_LITE) | PTHR24223:SF263 (PANTHER) | PTHR24223 (PANTHER) | IPR017871 (PROSITE_PATTERNS) | IPR003439 (PROSITE_PROFILES) | IPR011527 (PROSITE_PROFILES) | IPR003439 (PROSITE_PROFILES) | IPR011527 (PROSITE_PROFILES) | cd03250 (CDD)…	F:GO:0016887 | F:GO:0005524 | F:GO:0042626 | P:GO:0055085 | C:GO:0016021	F:ATPase activity	F:ATPase activity, coupled to transmembrane movement of substances	P:transmembrane transport	C:integral component of membrane
	VvCarFPS02VCR702_v1_PsGc_1018.ver1_0.g007060.m01	VvCarFPS02VCR702_v1_PsGc_1018.ver1_0.g007060	0	6-phosphogluconate dehydrogenase family	P:GO:0005975 | F:GO:0003824 | P:GO:0006139 | P:GO:0044723	P:carbohydrate metabolic process | F:catalytic activity | P:nucleobase-containing compound metabolic process | P:single-organism carbohydrate metabolic process	EC:1.1.1.44	Phosphogluconate dehydrogenase (NADP(+)-dependent, decarboxylating)	IPR006183 (PRINTS) | IPR006114 (SMART) | IPR006115 (PFAM) | G3DSA:3.40.50.720 (GENE3D) | IPR013328 (G3DSA:1.10.1040.GENE3D) | IPR006114 (PFAM) | PTHR11811:SF33 (PANTHER) | PTHR11811 (PANTHER) | IPR036291 (SUPERFAMILY) | IPR008927 (SUPERFAMILY)	F:GO:0004616 | P:GO:0006098 | F:GO:0016491 | P:GO:0055114	F:phosphogluconate dehydrogenase (decarboxylating) activity	F:oxidoreductase activity	P:oxidation-reduction process
	VvCarFPS02VCR702_v1_PsGc_1018.ver1_0.g007070.m01	VvCarFPS02VCR702_v1_PsGc_1018.ver1_0.g007070	0	6-phosphogluconate dehydrogenase family	P:GO:0005975 | F:GO:0003824 | P:GO:0006139 | P:GO:0044723	P:carbohydrate metabolic process | F:catalytic activity | P:nucleobase-containing compound metabolic process | P:single-organism carbohydrate metabolic process	EC:1.1.1.44	Phosphogluconate dehydrogenase (NADP(+)-dependent, decarboxylating)	IPR006114 (SMART) | G3DSA:1.20.5.320 (GENE3D) | IPR006114 (PFAM) | IPR013328 (G3DSA:1.10.1040.GENE3D) | PTHR11811:SF33 (PANTHER) | PTHR11811 (PANTHER) | IPR008927 (SUPERFAMILY) | TMhelix (TMHMM)	F:GO:0004616 | P:GO:0006098 | F:GO:0016491 | P:GO:0055114	F:phosphogluconate dehydrogenase (decarboxylating) activity	F:oxidoreductase activity	P:oxidation-reduction process
	VvCarFPS02VCR702_v1_PsGc_1018.ver1_0.g007080.m01	VvCarFPS02VCR702_v1_PsGc_1018.ver1_0.g007080	0	plant F17O14-7	C:GO:0016020	C:membrane	0	0	IPR010605 (PFAM) | PTHR33512:SF4 (PANTHER) | IPR010605 (PANTHER) | SignalP-noTM (SIGNALP_EUK) | TMhelix (TMHMM) | TMhelix (TMHMM) | TMhelix (TMHMM)	no GO terms	no GO terms
	VvCarFPS02VCR702_v1_PsGc_1018.ver1_0.g007090.m01	VvCarFPS02VCR702_v1_PsGc_1018.ver1_0.g007090	0	BTB POZ domain-containing POB1-like	F:GO:0005515 | C:GO:0005622	F:protein binding | C:intracellular	0	0	IPR000210 (SMART) | IPR011705 (SMART) | G3DSA:3.30.710.10 (GENE3D) | IPR000210 (PFAM) | IPR011705 (PFAM) | IPR008974 (G3DSA:2.60.210.GENE3D) | G3DSA:1.25.40.420 (GENE3D) | PTHR24412:SF148 (PANTHER) | PTHR24412 (PANTHER) | IPR000210 (PROSITE_PROFILES) | IPR011333 (SUPERFAMILY) | IPR008974 (SUPERFAMILY)	F:GO:0005515	F:protein binding
	VvCarFPS02VCR702_v1_PsGc_1018.ver1_0.g007100.m01	VvCarFPS02VCR702_v1_PsGc_1018.ver1_0.g007100	0	acyl-coenzyme A:6-aminopenicillanic acid acyl-transferase	F:GO:0016740	F:transferase activity	0	0	IPR005079 (PFAM) | G3DSA:3.60.60.10 (GENE3D) | PTHR34180 (PANTHER)	no GO terms	no GO terms
	VvCarFPS02VCR702_v1_PsGc_1018.ver1_0.g007110.m01	VvCarFPS02VCR702_v1_PsGc_1018.ver1_0.g007110	0	lactoylglutathione lyase family	F:GO:0003824	F:catalytic activity	0	0	IPR029068 (G3DSA:3.10.180.GENE3D) | PTHR31071:SF6 (PANTHER) | PTHR31071 (PANTHER) | IPR029068 (SUPERFAMILY)	no GO terms	no GO terms
	VvCarFPS02VCR702_v1_PsGc_1018.ver1_0.g007120.m01	VvCarFPS02VCR702_v1_PsGc_1018.ver1_0.g007120	0	intracellular transporter USO1	0	0	0	0	Coil (COILS) | Coil (COILS) | mobidb-lite (MOBIDB_LITE) | mobidb-lite (MOBIDB_LITE) | PTHR31071 (PANTHER) | PTHR31071:SF9 (PANTHER)	no GO terms	no GO terms
	VvCarFPS02VCR702_v1_PsGc_1018.ver1_0.g007130.m01	VvCarFPS02VCR702_v1_PsGc_1018.ver1_0.g007130	0	hypothetical protein MTR_3g060740	0	0	0	0	TMhelix (TMHMM)	no GO terms	no GO terms
	VvCarFPS02VCR702_v1_PsGc_1018.ver1_0.g007140.m01	VvCarFPS02VCR702_v1_PsGc_1018.ver1_0.g007140	0	Galactose oxidase kelch repeat superfamily	F:GO:0005515 | C:GO:0016020	F:protein binding | C:membrane	0	0	IPR001810 (SMART) | IPR001810 (PFAM) | G3DSA:1.20.1280.50 (GENE3D) | PTHR10706:SF138 (PANTHER) | PTHR10706 (PANTHER) | IPR001810 (PROSITE_PROFILES) | IPR036047 (SUPERFAMILY) | IPR011043 (SUPERFAMILY)	F:GO:0005515	F:protein binding
	VvCarFPS02VCR702_v1_PsGc_1018.ver1_0.g007150.m01	VvCarFPS02VCR702_v1_PsGc_1018.ver1_0.g007150	0	cation H+ exchanger 3	C:GO:0005623 | C:GO:0016020 | P:GO:0006810 | F:GO:0005215	C:cell | C:membrane | P:transport | F:transporter activity	0	0	IPR006153 (PFAM) | G3DSA:1.20.1530.20 (GENE3D) | PTHR32468 (PANTHER) | PTHR32468:SF39 (PANTHER) | TMhelix (TMHMM) | TMhelix (TMHMM) | TMhelix (TMHMM) | TMhelix (TMHMM) | TMhelix (TMHMM) | TMhelix (TMHMM) | TMhelix (TMHMM) | TMhelix (TMHMM) | TMhelix (TMHMM) | TMhelix (TMHMM)	P:GO:0006812 | P:GO:0055085 | F:GO:0015299 | C:GO:0016021	P:cation transport	F:solute:proton antiporter activity	C:integral component of membrane
	VvCarFPS02VCR702_v1_PsGc_1018.ver1_0.g007160.m01	VvCarFPS02VCR702_v1_PsGc_1018.ver1_0.g007160	0	cation H+ exchanger 3	C:GO:0005623 | C:GO:0016020 | P:GO:0006810 | F:GO:0005215	C:cell | C:membrane | P:transport | F:transporter activity	0	0	G3DSA:3.40.50.12370 (GENE3D) | IPR006153 (PFAM) | G3DSA:1.20.1530.20 (GENE3D) | PTHR32468 (PANTHER) | PTHR32468:SF39 (PANTHER) | TMhelix (TMHMM) | TMhelix (TMHMM) | TMhelix (TMHMM) | TMhelix (TMHMM) | TMhelix (TMHMM) | TMhelix (TMHMM) | TMhelix (TMHMM) | TMhelix (TMHMM) | TMhelix (TMHMM) | TMhelix (TMHMM) | TMhelix (TMHMM) | TMhelix (TMHMM)	F:GO:0015299 | P:GO:0006812 | P:GO:0055085 | C:GO:0016021	F:solute:proton antiporter activity	P:transmembrane transport	C:integral component of membrane
	VvCarFPS02VCR702_v1_PsGc_1018.ver1_0.g007170.m01	VvCarFPS02VCR702_v1_PsGc_1018.ver1_0.g007170	0	cation H+ exchanger 3	C:GO:0016020 | P:GO:0006810 | F:GO:0005215	C:membrane | P:transport | F:transporter activity	0	0	G3DSA:1.20.1530.20 (GENE3D) | IPR006153 (PFAM) | PTHR32468 (PANTHER) | PTHR32468:SF39 (PANTHER) | TMhelix (TMHMM) | TMhelix (TMHMM) | TMhelix (TMHMM)	P:GO:0006812 | P:GO:0055085 | F:GO:0015299 | C:GO:0016021	P:cation transport	F:solute:proton antiporter activity	C:integral component of membrane
	VvCarFPS02VCR702_v1_PsGc_1018.ver1_0.g007180.m01	VvCarFPS02VCR702_v1_PsGc_1018.ver1_0.g007180	0	cation H+ exchanger 3	C:GO:0016020	C:membrane	0	0	G3DSA:1.20.1530.20 (GENE3D) | IPR014729 (G3DSA:3.40.50.GENE3D) | PTHR32468 (PANTHER) | PTHR32468:SF39 (PANTHER) | TMhelix (TMHMM)	no GO terms	no GO terms
	VvCarFPS02VCR702_v1_PsGc_1018.ver1_0.g007190.m01	VvCarFPS02VCR702_v1_PsGc_1018.ver1_0.g007190	0	cation H+ exchanger 3	C:GO:0016020 | P:GO:0006810 | F:GO:0005215	C:membrane | P:transport | F:transporter activity	0	0	G3DSA:1.20.1530.20 (GENE3D) | IPR006153 (PFAM) | PTHR32468 (PANTHER) | PTHR32468:SF34 (PANTHER) | TMhelix (TMHMM) | TMhelix (TMHMM) | TMhelix (TMHMM) | TMhelix (TMHMM) | TMhelix (TMHMM) | TMhelix (TMHMM) | TMhelix (TMHMM) | TMhelix (TMHMM) | TMhelix (TMHMM) | TMhelix (TMHMM) | TMhelix (TMHMM) | TMhelix (TMHMM)	P:GO:0006812 | F:GO:0015299 | P:GO:0055085 | C:GO:0016021	P:cation transport	P:transmembrane transport	C:integral component of membrane
	VvCarFPS02VCR702_v1_PsGc_1018.ver1_0.g007200.m01	VvCarFPS02VCR702_v1_PsGc_1018.ver1_0.g007200	0	dirigent 5-like	C:GO:0005576	C:extracellular region	0	0	IPR004265 (PFAM) | PTHR21495 (PANTHER) | PTHR21495:SF70 (PANTHER) | SignalP-TM (SIGNALP_GRAM_POSITIVE) | SignalP-noTM (SIGNALP_EUK) | TMhelix (TMHMM)	no GO terms	no GO terms
	VvCarFPS02VCR702_v1_PsGc_1018.ver1_0.g007210.m01	VvCarFPS02VCR702_v1_PsGc_1018.ver1_0.g007210	0	dirigent 5-like	C:GO:0005576	C:extracellular region	0	0	IPR004265 (PFAM) | PTHR21495:SF70 (PANTHER) | PTHR21495 (PANTHER) | SignalP-TM (SIGNALP_GRAM_POSITIVE) | SignalP-noTM (SIGNALP_EUK) | TMhelix (TMHMM)	no GO terms	no GO terms
	VvCarFPS02VCR702_v1_PsGc_1018.ver1_0.g007220.m01	VvCarFPS02VCR702_v1_PsGc_1018.ver1_0.g007220	0	dirigent 5-like	C:GO:0005576	C:extracellular region	0	0	IPR004265 (PFAM) | PTHR21495 (PANTHER) | PTHR21495:SF49 (PANTHER) | SignalP-noTM (SIGNALP_EUK) | TMhelix (TMHMM)	no GO terms	no GO terms
	VvCarFPS02VCR702_v1_PsGc_1018.ver1_0.g007230.m01	VvCarFPS02VCR702_v1_PsGc_1018.ver1_0.g007230	0	dirigent 5-like	C:GO:0005576	C:extracellular region	0	0	IPR004265 (PFAM) | PTHR21495 (PANTHER) | PTHR21495:SF49 (PANTHER) | SignalP-TM (SIGNALP_GRAM_POSITIVE) | SignalP-noTM (SIGNALP_EUK) | TMhelix (TMHMM)	no GO terms	no GO terms
	VvCarFPS02VCR702_v1_PsGc_1018.ver1_0.g007240.m01	VvCarFPS02VCR702_v1_PsGc_1018.ver1_0.g007240	0	GDT1 chloroplastic	C:GO:0016020	C:membrane	0	0	IPR001727 (PFAM) | PTHR12608:SF6 (PANTHER) | IPR001727 (PANTHER) | IPR001727 (PROSITE_PATTERNS) | TMhelix (TMHMM) | TMhelix (TMHMM) | TMhelix (TMHMM) | TMhelix (TMHMM) | TMhelix (TMHMM) | TMhelix (TMHMM) | TMhelix (TMHMM)	no GO terms	no GO terms
	VvCarFPS02VCR702_v1_PsGc_1018.ver1_0.g007250.m01	VvCarFPS02VCR702_v1_PsGc_1018.ver1_0.g007250	0	WRKY transcription factor	0	0	0	0	mobidb-lite (MOBIDB_LITE) | mobidb-lite (MOBIDB_LITE) | PTHR31827:SF21 (PANTHER) | PTHR31827:SF21 (PANTHER) | PTHR31827:SF21 (PANTHER) | PTHR31827 (PANTHER) | PTHR31827 (PANTHER)	no GO terms	no GO terms
	VvCarFPS02VCR702_v1_PsGc_1018.ver1_0.g007260.m01	VvCarFPS02VCR702_v1_PsGc_1018.ver1_0.g007260	0	aluminum-activated malate transporter 9-like	C:GO:0016020 | P:GO:0044765 | P:GO:0006810	C:membrane | P:single-organism transport | P:transport	0	0	IPR020966 (PFAM) | mobidb-lite (MOBIDB_LITE) | PTHR31086 (PANTHER) | PTHR31086:SF17 (PANTHER) | PTHR31086:SF17 (PANTHER) | TMhelix (TMHMM) | TMhelix (TMHMM) | TMhelix (TMHMM) | TMhelix (TMHMM) | TMhelix (TMHMM) | TMhelix (TMHMM)	P:GO:0015743	P:malate transport
	VvCarFPS02VCR702_v1_PsGc_1018.ver1_0.g007270.m01	VvCarFPS02VCR702_v1_PsGc_1018.ver1_0.g007270	0	calmodulin-domain kinase CDPK	F:GO:0000166 | P:GO:0006464 | F:GO:0016301	F:nucleotide binding | P:cellular protein modification process | F:kinase activity	0	0	IPR002048 (SMART) | IPR000719 (SMART) | G3DSA:1.10.238.10 (GENE3D) | IPR002048 (PFAM) | IPR000719 (PFAM) | G3DSA:1.10.510.10 (GENE3D) | G3DSA:3.30.200.20 (GENE3D) | mobidb-lite (MOBIDB_LITE) | PTHR24349:SF182 (PANTHER) | PTHR24349 (PANTHER) | IPR018247 (PROSITE_PATTERNS) | IPR018247 (PROSITE_PATTERNS) | IPR018247 (PROSITE_PATTERNS) | IPR008271 (PROSITE_PATTERNS) | IPR017441 (PROSITE_PATTERNS) | I…	F:GO:0005524 | F:GO:0005509 | F:GO:0004672 | P:GO:0006468	F:ATP binding	F:protein kinase activity	P:protein phosphorylation
	VvCarFPS02VCR702_v1_PsGc_1018.ver1_0.g007280.m01	VvCarFPS02VCR702_v1_PsGc_1018.ver1_0.g007280	0	potassium transporter 2	C:GO:0016020 | P:GO:0044763 | P:GO:0044765 | P:GO:0006810 | F:GO:0005215 | P:GO:0009987	C:membrane | P:single-organism cellular process | P:single-organism transport | P:transport | F:transporter activity | P:cellular process	0	0	IPR003855 (TIGRFAM) | IPR003855 (PFAM) | IPR003855 (PANTHER) | PTHR30540:SF21 (PANTHER) | TMhelix (TMHMM) | TMhelix (TMHMM) | TMhelix (TMHMM) | TMhelix (TMHMM) | TMhelix (TMHMM) | TMhelix (TMHMM) | TMhelix (TMHMM) | TMhelix (TMHMM) | TMhelix (TMHMM) | TMhelix (TMHMM) | TMhelix (TMHMM) | TMhelix (TMHMM) | TMhelix (TMHMM) | TMhelix (TMHMM)	F:GO:0015079 | P:GO:0071805 | C:GO:0016020	F:potassium ion transmembrane transporter activity	C:membrane
	VvCarFPS02VCR702_v1_PsGc_1018.ver1_0.g007290.m01	VvCarFPS02VCR702_v1_PsGc_1018.ver1_0.g007290	0	CAAX amino terminal protease family	C:GO:0016020	C:membrane	0	0	IPR003675 (PFAM) | PTHR43592:SF5 (PANTHER) | PTHR43592 (PANTHER) | TMhelix (TMHMM) | TMhelix (TMHMM) | TMhelix (TMHMM) | TMhelix (TMHMM)	C:GO:0016020	C:membrane
	VvCarFPS02VCR702_v1_PsGc_1018.ver1_0.g007300.m01	VvCarFPS02VCR702_v1_PsGc_1018.ver1_0.g007300	0	P-loop containing nucleoside triphosphate hydrolases superfamily	F:GO:0000166	F:nucleotide binding	0	0	Coil (COILS) | IPR003593 (SMART) | G3DSA:3.40.50.300 (GENE3D) | IPR003959 (PFAM) | G3DSA:1.10.8.60 (GENE3D) | mobidb-lite (MOBIDB_LITE) | mobidb-lite (MOBIDB_LITE) | PTHR23074 (PANTHER) | PTHR23074:SF98 (PANTHER) | IPR003960 (PROSITE_PATTERNS) | cd00009 (CDD) | IPR027417 (SUPERFAMILY) | IPR027417 (SUPERFAMILY) | TMhelix (TMHMM)	F:GO:0005524	F:ATP binding
	VvCarFPS02VCR702_v1_PsGc_1018.ver1_0.g007310.m01	VvCarFPS02VCR702_v1_PsGc_1018.ver1_0.g007310	0	reticulon family	C:GO:0005737 | C:GO:0016020 | C:GO:0005783	C:cytoplasm | C:membrane | C:endoplasmic reticulum	0	0	IPR003388 (PFAM) | mobidb-lite (MOBIDB_LITE) | PTHR10994 (PANTHER) | PTHR10994:SF70 (PANTHER) | IPR003388 (PROSITE_PROFILES) | TMhelix (TMHMM) | TMhelix (TMHMM) | TMhelix (TMHMM)	no GO terms	no GO terms
	VvCarFPS02VCR702_v1_PsGc_1018.ver1_0.g007320.m01	VvCarFPS02VCR702_v1_PsGc_1018.ver1_0.g007320	0	Ribosomal L25 Gln-tRNA anti-codon-binding domain-containing	F:GO:0003723 | F:GO:0005198 | C:GO:0005840 | P:GO:0006412	F:RNA binding | F:structural molecule activity | C:ribosome | P:translation	0	0	IPR020057 (PFAM) | IPR029751 (PFAM) | IPR037121 (G3DSA:2.170.120.GENE3D) | PTHR33284 (PANTHER) | IPR029751 (PRODOM) | IPR029751 (CDD) | IPR011035 (SUPERFAMILY)	F:GO:0003735 | F:GO:0008097 | C:GO:0005840 | P:GO:0006412	F:structural constituent of ribosome	C:ribosome	P:translation
	VvCarFPS02VCR702_v1_PsGc_1018.ver1_0.g007330.m01	VvCarFPS02VCR702_v1_PsGc_1018.ver1_0.g007330	0	cellulase (glycosyl hydrolase family 5)	P:GO:0005975 | F:GO:0016787	P:carbohydrate metabolic process | F:hydrolase activity	0	0	G3DSA:2.80.10.50 (GENE3D) | G3DSA:3.20.20.80 (GENE3D) | IPR001547 (PFAM) | PTHR31263 (PANTHER) | PTHR31263:SF10 (PANTHER) | IPR000772 (PROSITE_PROFILES) | IPR017853 (SUPERFAMILY) | IPR035992 (SUPERFAMILY)	P:GO:0005975 | F:GO:0004553	P:carbohydrate metabolic process
	VvCarFPS02VCR702_v1_PsGc_1018.ver1_0.g007340.m01	VvCarFPS02VCR702_v1_PsGc_1018.ver1_0.g007340	0	cellulase (glycosyl hydrolase family 5)	P:GO:0005975 | F:GO:0016787	P:carbohydrate metabolic process | F:hydrolase activity	0	0	G3DSA:3.20.20.80 (GENE3D) | G3DSA:2.80.10.50 (GENE3D) | IPR001547 (PFAM) | PTHR31263 (PANTHER) | PTHR31263:SF10 (PANTHER) | SignalP-TM (SIGNALP_EUK) | IPR035992 (SUPERFAMILY) | IPR017853 (SUPERFAMILY) | TMhelix (TMHMM)	P:GO:0005975 | F:GO:0004553	P:carbohydrate metabolic process
	VvCarFPS02VCR702_v1_PsGc_1018.ver1_0.g007350.m01	VvCarFPS02VCR702_v1_PsGc_1018.ver1_0.g007350	0	cellulase (glycosyl hydrolase family 5)	P:GO:0005975 | F:GO:0016787	P:carbohydrate metabolic process | F:hydrolase activity	0	0	G3DSA:3.20.20.80 (GENE3D) | IPR001547 (PFAM) | G3DSA:2.80.10.50 (GENE3D) | PTHR31263:SF10 (PANTHER) | PTHR31263 (PANTHER) | IPR000772 (PROSITE_PROFILES) | IPR017853 (SUPERFAMILY) | IPR035992 (SUPERFAMILY)	P:GO:0005975 | F:GO:0004553	P:carbohydrate metabolic process
	VvCarFPS02VCR702_v1_PsGc_1018.ver1_0.g007360.m01	VvCarFPS02VCR702_v1_PsGc_1018.ver1_0.g007360	0	cellulase (glycosyl hydrolase family 5)	P:GO:0005975 | F:GO:0016787	P:carbohydrate metabolic process | F:hydrolase activity	0	0	G3DSA:2.80.10.50 (GENE3D) | IPR001547 (PFAM) | G3DSA:3.20.20.80 (GENE3D) | PTHR31263 (PANTHER) | PTHR31263:SF10 (PANTHER) | IPR000772 (CDD) | SignalP-noTM (SIGNALP_EUK) | IPR035992 (SUPERFAMILY) | IPR017853 (SUPERFAMILY)	P:GO:0005975 | F:GO:0004553	P:carbohydrate metabolic process
	VvCarFPS02VCR702_v1_PsGc_1018.ver1_0.g007370.m01	VvCarFPS02VCR702_v1_PsGc_1018.ver1_0.g007370	0	cellulase (glycosyl hydrolase family 5)	P:GO:0005975 | F:GO:0016787	P:carbohydrate metabolic process | F:hydrolase activity	0	0	IPR001547 (PFAM) | G3DSA:3.20.20.80 (GENE3D) | G3DSA:2.80.10.50 (GENE3D) | PTHR31263 (PANTHER) | PTHR31263:SF10 (PANTHER) | IPR000772 (CDD) | SignalP-noTM (SIGNALP_EUK) | IPR017853 (SUPERFAMILY) | IPR035992 (SUPERFAMILY)	P:GO:0005975 | F:GO:0004553	P:carbohydrate metabolic process
	VvCarFPS02VCR702_v1_PsGc_1018.ver1_0.g007380.m01	VvCarFPS02VCR702_v1_PsGc_1018.ver1_0.g007380	0	probable membrane-associated kinase regulator 2	C:GO:0005886	C:plasma membrane	0	0	mobidb-lite (MOBIDB_LITE) | mobidb-lite (MOBIDB_LITE) | mobidb-lite (MOBIDB_LITE) | mobidb-lite (MOBIDB_LITE) | mobidb-lite (MOBIDB_LITE) | PTHR33929:SF1 (PANTHER) | PTHR33929 (PANTHER)	no GO terms	no GO terms
	VvCarFPS02VCR702_v1_PsGc_1018.ver1_0.g007390.m01	VvCarFPS02VCR702_v1_PsGc_1018.ver1_0.g007390	0	late embryogenesis abundant At1g64065	C:GO:0016020	C:membrane	0	0	G3DSA:2.60.40.1820 (GENE3D) | IPR004864 (PFAM) | PTHR31852 (PANTHER) | PTHR31852:SF23 (PANTHER) | SSF117070 (SUPERFAMILY) | TMhelix (TMHMM)	no GO terms	no GO terms
	VvCarFPS02VCR702_v1_PsGc_1018.ver1_0.g007400.m01	VvCarFPS02VCR702_v1_PsGc_1018.ver1_0.g007400	0	late embryogenesis abundant At1g64065	C:GO:0016020	C:membrane	0	0	IPR004864 (PFAM) | PTHR31852 (PANTHER) | PTHR31852:SF10 (PANTHER) | SSF117070 (SUPERFAMILY) | TMhelix (TMHMM)	no GO terms	no GO terms
	VvCarFPS02VCR702_v1_PsGc_1018.ver1_0.g007410.m01	VvCarFPS02VCR702_v1_PsGc_1018.ver1_0.g007410	0	late embryogenesis abundant At1g64065	0	0	0	0	IPR004864 (PFAM) | mobidb-lite (MOBIDB_LITE) | PTHR31852:SF10 (PANTHER) | PTHR31852 (PANTHER) | TMhelix (TMHMM)	no GO terms	no GO terms
	VvCarFPS02VCR702_v1_PsGc_1018.ver1_0.g007420.m01	VvCarFPS02VCR702_v1_PsGc_1018.ver1_0.g007420	0	late embryogenesis abundant At1g64065	C:GO:0016020	C:membrane	0	0	IPR004864 (PFAM) | PTHR31852:SF10 (PANTHER) | PTHR31852 (PANTHER) | SSF117070 (SUPERFAMILY) | TMhelix (TMHMM)	no GO terms	no GO terms
	VvCarFPS02VCR702_v1_PsGc_1018.ver1_0.g007430.m01	VvCarFPS02VCR702_v1_PsGc_1018.ver1_0.g007430	0	respiratory burst oxidase homolog A-like	F:GO:0003824 | C:GO:0016020 | P:GO:0008152 | F:GO:0005488 | P:GO:0044710 | P:GO:0006950	F:catalytic activity | C:membrane | P:metabolic process | F:binding | P:single-organism metabolic process | P:response to stress	EC:1.11.1.7	Peroxidase	Coil (COILS) | IPR000778 (PRINTS) | IPR013112 (PFAM) | G3DSA:2.40.30.10 (GENE3D) | G3DSA:1.10.238.10 (GENE3D) | IPR013623 (PFAM) | IPR013130 (PFAM) | IPR013121 (PFAM) | mobidb-lite (MOBIDB_LITE) | mobidb-lite (MOBIDB_LITE) | mobidb-lite (MOBIDB_LITE) | PTHR11972 (PANTHER) | PTHR11972:SF66 (PANTHER) | IPR018247 (PROSITE_PATTERNS) | IPR002048 (PROSITE_PROFILES) | IPR002048 (PROSITE_PROFILES) | IPR0…	F:GO:0004601 | F:GO:0050664 | F:GO:0016491 | F:GO:0005509 | C:GO:0016020 | P:GO:0055114	F:peroxidase activity	F:oxidoreductase activity	F:calcium ion binding	C:membrane	P:oxidation-reduction process
	VvCarFPS02VCR702_v1_PsGc_1018.ver1_0.g007440.m01	VvCarFPS02VCR702_v1_PsGc_1018.ver1_0.g007440	0	LURP-one-related 8-like	0	0	0	0	IPR038595 (G3DSA:3.20.90.GENE3D) | IPR007612 (PFAM) | PTHR31087:SF14 (PANTHER) | IPR007612 (PANTHER) | IPR025659 (SUPERFAMILY)	no GO terms	no GO terms
	VvCarFPS02VCR702_v1_PsGc_1018.ver1_0.g007450.m01	VvCarFPS02VCR702_v1_PsGc_1018.ver1_0.g007450	0	LURP-one-related 8-like	C:GO:0016020	C:membrane	0	0	IPR038595 (G3DSA:3.20.90.GENE3D) | IPR007612 (PFAM) | IPR007612 (PANTHER) | PTHR31087:SF14 (PANTHER) | IPR025659 (SUPERFAMILY) | TMhelix (TMHMM)	no GO terms	no GO terms
	VvCarFPS02VCR702_v1_PsGc_1018.ver1_0.g007460.m01	VvCarFPS02VCR702_v1_PsGc_1018.ver1_0.g007460	0	hypothetical protein POPTR_0001s09950g	0	0	0	0	mobidb-lite (MOBIDB_LITE) | PTHR36723 (PANTHER)	no GO terms	no GO terms
	VvCarFPS02VCR702_v1_PsGc_1018.ver1_0.g007470.m01	VvCarFPS02VCR702_v1_PsGc_1018.ver1_0.g007470	0	DEAD-box ATP-dependent RNA helicase	0	0	0	0	mobidb-lite (MOBIDB_LITE) | PTHR36723 (PANTHER)	no GO terms	no GO terms
	VvCarFPS02VCR702_v1_PsGc_1018.ver1_0.g007480.m01	VvCarFPS02VCR702_v1_PsGc_1018.ver1_0.g007480	0	hypothetical protein POPTR_0001s09950g	0	0	0	0	PTHR36723 (PANTHER)	no GO terms	no GO terms
	VvCarFPS02VCR702_v1_PsGc_1018.ver1_0.g007490.m01	VvCarFPS02VCR702_v1_PsGc_1018.ver1_0.g007490	0	serine threonine- phosphatase PP1	F:GO:0005488 | F:GO:0016787	F:binding | F:hydrolase activity	0	0	IPR006186 (PRINTS) | IPR006186 (SMART) | IPR029052 (G3DSA:3.60.21.GENE3D) | IPR004843 (PFAM) | PTHR11668 (PANTHER) | PTHR11668:SF294 (PANTHER) | PTHR11668 (PANTHER) | IPR006186 (PROSITE_PATTERNS) | SSF56300 (SUPERFAMILY)	F:GO:0016787	F:hydrolase activity
	VvCarFPS02VCR702_v1_PsGc_1018.ver1_0.g007500.m01	VvCarFPS02VCR702_v1_PsGc_1018.ver1_0.g007500	0	E3 SUMO- ligase SIZ1	F:GO:0005488 | F:GO:0016740	F:binding | F:transferase activity	0	0	IPR013083 (G3DSA:3.30.40.GENE3D) | IPR004181 (PFAM) | mobidb-lite (MOBIDB_LITE) | mobidb-lite (MOBIDB_LITE) | mobidb-lite (MOBIDB_LITE) | mobidb-lite (MOBIDB_LITE) | mobidb-lite (MOBIDB_LITE) | PTHR10782 (PANTHER) | IPR027229 (PTHR10782:PANTHER) | IPR027229 (PTHR10782:PANTHER) | IPR004181 (PROSITE_PROFILES) | cd16650 (CDD)	F:GO:0008270 | F:GO:0019789	F:zinc ion binding
	VvCarFPS02VCR702_v1_PsGc_1018.ver1_0.g007510.m01	VvCarFPS02VCR702_v1_PsGc_1018.ver1_0.g007510	0	SGT1 homolog	F:GO:0005515 | C:GO:0005737	F:protein binding | C:cytoplasm	0	0	Coil (COILS) | IPR019734 (SMART) | IPR011990 (G3DSA:1.25.40.GENE3D) | IPR019734 (PFAM) | IPR008978 (G3DSA:2.60.40.GENE3D) | IPR007052 (PFAM) | mobidb-lite (MOBIDB_LITE) | PTHR22904 (PANTHER) | PTHR22904:SF496 (PANTHER) | IPR019734 (PROSITE_PROFILES) | IPR019734 (PROSITE_PROFILES) | IPR013026 (PROSITE_PROFILES) | IPR007052 (PROSITE_PROFILES) | IPR019734 (PROSITE_PROFILES) | cd06466 (CDD) | IPR0119…	F:GO:0005515	F:protein binding
	VvCarFPS02VCR702_v1_PsGc_1018.ver1_0.g007520.m01	VvCarFPS02VCR702_v1_PsGc_1018.ver1_0.g007520	0	transducin WD-like repeat-	F:GO:0005515	F:protein binding	0	0	IPR015943 (G3DSA:2.130.10.GENE3D) | PTHR45384 (PANTHER) | IPR036322 (SUPERFAMILY)	F:GO:0005515	F:protein binding
	VvCarFPS02VCR702_v1_PsGc_1018.ver1_0.g007530.m01	VvCarFPS02VCR702_v1_PsGc_1018.ver1_0.g007530	0	transducin WD-like repeat-	F:GO:0005515 | C:GO:0005829	F:protein binding | C:cytosol	0	0	IPR015943 (G3DSA:2.130.10.GENE3D) | IPR015943 (G3DSA:2.130.10.GENE3D) | mobidb-lite (MOBIDB_LITE) | PTHR45384 (PANTHER) | IPR019775 (PROSITE_PATTERNS) | IPR001680 (PROSITE_PROFILES) | IPR017986 (PROSITE_PROFILES) | IPR016024 (SUPERFAMILY) | SSF69322 (SUPERFAMILY)	F:GO:0005515 | F:GO:0005488	F:protein binding
	VvCarFPS02VCR702_v1_PsGc_1018.ver1_0.g007540.m01	VvCarFPS02VCR702_v1_PsGc_1018.ver1_0.g007540	0	glycosyl hydrolase family 9	P:GO:0005975 | P:GO:0044763 | P:GO:0009987 | F:GO:0016787 | P:GO:0044723	P:carbohydrate metabolic process | P:single-organism cellular process | P:cellular process | F:hydrolase activity | P:single-organism carbohydrate metabolic process	EC:3.2.1.4	Cellulase	IPR001701 (PFAM) | IPR012341 (G3DSA:1.50.10.GENE3D) | PTHR22298:SF22 (PANTHER) | PTHR22298 (PANTHER) | IPR033126 (PROSITE_PATTERNS) | SignalP-noTM (SIGNALP_EUK) | IPR008928 (SUPERFAMILY)	P:GO:0005975 | F:GO:0003824 | F:GO:0004553	P:carbohydrate metabolic process	F:hydrolase activity, hydrolyzing O-glycosyl compounds
	VvCarFPS02VCR702_v1_PsGc_1018.ver1_0.g007550.m01	VvCarFPS02VCR702_v1_PsGc_1018.ver1_0.g007550	0	WRKY transcription factor 22-like	F:GO:0003677 | F:GO:0003700 | P:GO:0009058 | P:GO:0006139 | C:GO:0005622	F:DNA binding | F:transcription factor activity, sequence-specific DNA binding | P:biosynthetic process | P:nucleobase-containing compound metabolic process | C:intracellular	0	0	IPR003657 (SMART) | IPR003657 (PFAM) | IPR036576 (G3DSA:2.20.25.GENE3D) | mobidb-lite (MOBIDB_LITE) | mobidb-lite (MOBIDB_LITE) | PTHR32096:SF53 (PANTHER) | PTHR32096 (PANTHER) | IPR003657 (PROSITE_PROFILES) | IPR036576 (SUPERFAMILY)	F:GO:0003700 | P:GO:0006355 | F:GO:0043565	F:transcription factor activity, sequence-specific DNA binding	F:sequence-specific DNA binding
	VvCarFPS02VCR702_v1_PsGc_1018.ver1_0.g007560.m01	VvCarFPS02VCR702_v1_PsGc_1018.ver1_0.g007560	0	meiotic recombination SPO11-2	F:GO:0000166 | F:GO:0003677 | F:GO:0003824 | P:GO:0009056 | P:GO:0006259 | C:GO:0005622	F:nucleotide binding | F:DNA binding | F:catalytic activity | P:catabolic process | P:DNA metabolic process | C:intracellular	0	0	IPR013048 (PRINTS) | IPR002815 (PRINTS) | G3DSA:3.40.1360.10 (GENE3D) | IPR013049 (PFAM) | PTHR10848:SF1 (PANTHER) | IPR002815 (PANTHER) | IPR034136 (CDD) | IPR036078 (SUPERFAMILY)	F:GO:0003677 | F:GO:0005524 | F:GO:0003824 | P:GO:0000737 | C:GO:0005694 | P:GO:0006259	F:DNA binding	F:catalytic activity	P:DNA catabolic process, endonucleolytic	C:chromosome	P:DNA metabolic process
	VvCarFPS02VCR702_v1_PsGc_1018.ver1_0.g007570.m01	VvCarFPS02VCR702_v1_PsGc_1018.ver1_0.g007570	0	D111 G-patch domain-containing	F:GO:0003676	F:nucleic acid binding	0	0	Coil (COILS) | IPR000467 (SMART) | IPR000467 (PFAM) | mobidb-lite (MOBIDB_LITE) | mobidb-lite (MOBIDB_LITE) | mobidb-lite (MOBIDB_LITE) | PTHR23149 (PANTHER) | PTHR23149:SF9 (PANTHER) | IPR000467 (PROSITE_PROFILES)	F:GO:0003676	F:nucleic acid binding
	VvCarFPS02VCR702_v1_PsGc_1018.ver1_0.g007580.m01	VvCarFPS02VCR702_v1_PsGc_1018.ver1_0.g007580	0	Det1 complexing ubiquitin ligase	C:GO:0005634 | P:GO:0019538 | P:GO:0009056 | P:GO:0009987	C:nucleus | P:protein metabolic process | P:catabolic process | P:cellular process	0	0	IPR018276 (PFAM) | mobidb-lite (MOBIDB_LITE) | mobidb-lite (MOBIDB_LITE) | IPR033575 (PANTHER) | PTHR31879:SF2 (PANTHER)	P:GO:0032434	P:regulation of proteasomal ubiquitin-dependent protein catabolic process
	VvCarFPS02VCR702_v1_PsGc_1018.ver1_0.g007590.m01	VvCarFPS02VCR702_v1_PsGc_1018.ver1_0.g007590	0	2-C-methyl-D-erythritol 2,4-cyclodiphosphate synthase	F:GO:0003824 | P:GO:0006629 | P:GO:0009058 | P:GO:0044763 | P:GO:0044711 | P:GO:0009987	F:catalytic activity | P:lipid metabolic process | P:biosynthetic process | P:single-organism cellular process | P:single-organism biosynthetic process | P:cellular process	EC:4.6.1.12	2-C-methyl-D-erythritol 2,4-cyclodiphosphate synthase	IPR003526 (PFAM) | IPR036571 (G3DSA:3.30.1330.GENE3D) | IPR003526 (TIGRFAM) | PTHR43181 (PANTHER) | IPR020555 (PROSITE_PATTERNS) | IPR003526 (HAMAP) | IPR003526 (CDD) | IPR036571 (SUPERFAMILY)	F:GO:0008685 | P:GO:0016114	F:2-C-methyl-D-erythritol 2,4-cyclodiphosphate synthase activity
	VvCarFPS02VCR702_v1_PsGc_1018.ver1_0.g007600.m01	VvCarFPS02VCR702_v1_PsGc_1018.ver1_0.g007600	0	1-aminocyclopropane-1-carboxylate synthase	F:GO:0003824 | P:GO:0009058 | F:GO:0005488	F:catalytic activity | P:biosynthetic process | F:binding	0	0	Coil (COILS) | PR00753 (PRINTS) | IPR015421 (G3DSA:3.40.640.GENE3D) | IPR015422 (G3DSA:3.90.1150.GENE3D) | IPR004839 (PFAM) | PTHR43795:SF6 (PANTHER) | PTHR43795 (PANTHER) | IPR004838 (PROSITE_PATTERNS) | cd00609 (CDD) | IPR015424 (SUPERFAMILY)	F:GO:0030170 | F:GO:0003824 | P:GO:0009058	F:pyridoxal phosphate binding	P:biosynthetic process
	VvCarFPS02VCR702_v1_PsGc_1018.ver1_0.g007610.m01	VvCarFPS02VCR702_v1_PsGc_1018.ver1_0.g007610	0	heavy metal-associated isoprenylated plant 39-like	C:GO:0005737 | F:GO:0005488 | P:GO:0006810	C:cytoplasm | F:binding | P:transport	0	0	IPR006121 (PFAM) | G3DSA:3.30.70.100 (GENE3D) | mobidb-lite (MOBIDB_LITE) | PTHR22814:SF127 (PANTHER) | PTHR22814 (PANTHER) | IPR036163 (SUPERFAMILY)	F:GO:0046872 | P:GO:0030001	F:metal ion binding
	VvCarFPS02VCR702_v1_PsGc_1018.ver1_0.g007620.m01	VvCarFPS02VCR702_v1_PsGc_1018.ver1_0.g007620	0	monodehydroascorbate reductase	F:GO:0000166 | F:GO:0003824 | P:GO:0008152 | P:GO:0044710	F:nucleotide binding | F:catalytic activity | P:metabolic process | P:single-organism metabolic process	0	0	PR00368 (PRINTS) | PR00411 (PRINTS) | IPR016156 (G3DSA:3.30.390.GENE3D) | IPR036188 (G3DSA:3.50.50.GENE3D) | IPR036188 (G3DSA:3.50.50.GENE3D) | IPR023753 (PFAM) | PTHR43557 (PANTHER) | PTHR43557:SF6 (PANTHER) | IPR036188 (SUPERFAMILY)	F:GO:0050660 | F:GO:0016491 | P:GO:0055114	F:flavin adenine dinucleotide binding	P:oxidation-reduction process
	VvCarFPS02VCR702_v1_PsGc_1018.ver1_0.g007630.m01	VvCarFPS02VCR702_v1_PsGc_1018.ver1_0.g007630	0	plant F1M20-13	C:GO:0016020	C:membrane	0	0	IPR008511 (PFAM) | PTHR31509 (PANTHER) | PTHR31509:SF7 (PANTHER)	no GO terms	no GO terms
	VvCarFPS02VCR702_v1_PsGc_1018.ver1_0.g007640.m01	VvCarFPS02VCR702_v1_PsGc_1018.ver1_0.g007640	0	myb transcription factor	C:GO:0005634 | F:GO:0003677	C:nucleus | F:DNA binding	0	0	IPR001005 (SMART) | IPR001005 (PFAM) | G3DSA:1.10.10.60 (GENE3D) | G3DSA:1.10.10.60 (GENE3D) | PTHR10641 (PANTHER) | PTHR10641:SF451 (PANTHER) | IPR017930 (PROSITE_PROFILES) | IPR017930 (PROSITE_PROFILES) | IPR001005 (CDD) | IPR001005 (CDD) | IPR009057 (SUPERFAMILY)	F:GO:0003677	F:DNA binding
	VvCarFPS02VCR702_v1_PsGc_1018.ver1_0.g007650.m01	VvCarFPS02VCR702_v1_PsGc_1018.ver1_0.g007650	0	40S ribosomal S10-1-like	C:GO:0005840	C:ribosome	0	0	IPR036388 (G3DSA:1.10.10.GENE3D) | IPR005326 (PFAM) | mobidb-lite (MOBIDB_LITE) | PTHR12146:SF7 (PANTHER) | IPR037447 (PANTHER)	no GO terms	no GO terms
	VvCarFPS02VCR702_v1_PsGc_1018.ver1_0.g007660.m01	VvCarFPS02VCR702_v1_PsGc_1018.ver1_0.g007660	0	pentatricopeptide repeat-containing chloroplastic-like	F:GO:0005515 | C:GO:0005622	F:protein binding | C:intracellular	0	0	IPR002885 (PFAM) | IPR002885 (PFAM) | IPR011990 (G3DSA:1.25.40.GENE3D) | IPR011990 (G3DSA:1.25.40.GENE3D) | IPR002885 (TIGRFAM) | PTHR24015:SF1007 (PANTHER) | PTHR24015 (PANTHER) | IPR002885 (PROSITE_PROFILES) | IPR002885 (PROSITE_PROFILES) | IPR002885 (PROSITE_PROFILES) | IPR002885 (PROSITE_PROFILES) | IPR002885 (PROSITE_PROFILES) | IPR002885 (PROSITE_PROFILES) | IPR002885 (PROSITE_PROFILES) | I…	F:GO:0005515	F:protein binding
	VvCarFPS02VCR702_v1_PsGc_1018.ver1_0.g007670.m01	VvCarFPS02VCR702_v1_PsGc_1018.ver1_0.g007670	0	Heat shock 83	F:GO:0000166 | F:GO:0005515 | P:GO:0009987 | P:GO:0006950	F:nucleotide binding | F:protein binding | P:cellular process | P:response to stress	0	0	IPR020575 (PRINTS) | IPR036890 (G3DSA:3.30.565.GENE3D) | IPR003594 (PFAM) | PTHR11528:SF74 (PANTHER) | IPR001404 (PANTHER) | IPR019805 (PROSITE_PATTERNS) | IPR003594 (CDD) | IPR036890 (SUPERFAMILY)	F:GO:0005524 | F:GO:0051082 | P:GO:0006457 | P:GO:0006950	F:ATP binding	P:protein folding	P:response to stress
	VvCarFPS02VCR702_v1_PsGc_1018.ver1_0.g007680.m01	VvCarFPS02VCR702_v1_PsGc_1018.ver1_0.g007680	0	mitogen-activated kinase homolog MMK2-like	F:GO:0000166 | C:GO:0005737 | P:GO:0007165 | P:GO:0006464 | F:GO:0004871 | F:GO:0016301	F:nucleotide binding | C:cytoplasm | P:signal transduction | P:cellular protein modification process | F:signal transducer activity | F:kinase activity	EC:2.7.11 | EC:2.7.11.24	Transferring phosphorus-containing groups | Mitogen-activated protein kinase	IPR000719 (SMART) | PIRSF000654 (PIRSF) | G3DSA:1.10.510.10 (GENE3D) | G3DSA:3.30.200.20 (GENE3D) | IPR000719 (PFAM) | PTHR24055 (PANTHER) | PTHR24055:SF224 (PANTHER) | IPR017441 (PROSITE_PATTERNS) | IPR008271 (PROSITE_PATTERNS) | IPR003527 (PROSITE_PATTERNS) | IPR000719 (PROSITE_PROFILES) | cd07858 (CDD) | IPR011009 (SUPERFAMILY)	F:GO:0005524 | F:GO:0004707 | F:GO:0004672 | P:GO:0006468	F:ATP binding	F:protein kinase activity	P:protein phosphorylation
	VvCarFPS02VCR702_v1_PsGc_1018.ver1_0.g007690.m01	VvCarFPS02VCR702_v1_PsGc_1018.ver1_0.g007690	0	probable polygalacturonase	P:GO:0005975 | P:GO:0044763 | P:GO:0009987 | F:GO:0016787 | P:GO:0044723	P:carbohydrate metabolic process | P:single-organism cellular process | P:cellular process | F:hydrolase activity | P:single-organism carbohydrate metabolic process	EC:3.2.1.15	Polygalacturonase	IPR024535 (PFAM) | IPR012334 (G3DSA:2.160.20.GENE3D) | IPR000743 (PFAM) | PTHR31339:SF7 (PANTHER) | PTHR31339 (PANTHER) | SignalP-TM (SIGNALP_GRAM_POSITIVE) | IPR011050 (SUPERFAMILY) | TMhelix (TMHMM)	P:GO:0005975 | F:GO:0004650	P:carbohydrate metabolic process
	VvCarFPS02VCR702_v1_PsGc_1018.ver1_0.g007700.m01	VvCarFPS02VCR702_v1_PsGc_1018.ver1_0.g007700	0	SPIRAL1-like 5	C:GO:0005856	C:cytoskeleton	0	0	mobidb-lite (MOBIDB_LITE) | PTHR33403:SF2 (PANTHER) | PTHR33403 (PANTHER)	no GO terms	no GO terms
	VvCarFPS02VCR702_v1_PsGc_1018.ver1_0.g007710.m01	VvCarFPS02VCR702_v1_PsGc_1018.ver1_0.g007710	0	beta-carotene hydroxylase	F:GO:0003824 | C:GO:0016020 | P:GO:0006629 | P:GO:0009058 | F:GO:0005488 | P:GO:0044711	F:catalytic activity | C:membrane | P:lipid metabolic process | P:biosynthetic process | F:binding | P:single-organism biosynthetic process	0	0	IPR006694 (PFAM) | PTHR31899 (PANTHER) | PTHR31899:SF7 (PANTHER) | TMhelix (TMHMM) | TMhelix (TMHMM) | TMhelix (TMHMM) | TMhelix (TMHMM)	F:GO:0016491 | F:GO:0005506 | P:GO:0008610 | P:GO:0055114	F:oxidoreductase activity	P:lipid biosynthetic process	P:oxidation-reduction process
	VvCarFPS02VCR702_v1_PsGc_1018.ver1_0.g007720.m01	VvCarFPS02VCR702_v1_PsGc_1018.ver1_0.g007720	0	Nuclear transport factor 2 (NTF2) family	0	0	0	0	G3DSA:3.10.450.50 (GENE3D) | PTHR33698 (PANTHER) | PTHR33698:SF1 (PANTHER) | IPR032710 (SUPERFAMILY)	no GO terms	no GO terms
	VvCarFPS02VCR702_v1_PsGc_1018.ver1_0.g007730.m01	VvCarFPS02VCR702_v1_PsGc_1018.ver1_0.g007730	0	pentatricopeptide repeat-containing At5g52630	F:GO:0005515 | C:GO:0005622	F:protein binding | C:intracellular	0	0	IPR011990 (G3DSA:1.25.40.GENE3D) | IPR002885 (PFAM) | IPR011990 (G3DSA:1.25.40.GENE3D) | IPR032867 (PFAM) | IPR002885 (PFAM) | IPR011990 (G3DSA:1.25.40.GENE3D) | IPR002885 (TIGRFAM) | PTHR24015:SF829 (PANTHER) | PTHR24015:SF829 (PANTHER) | PTHR24015:SF829 (PANTHER) | PTHR24015 (PANTHER) | PTHR24015 (PANTHER) | PTHR24015 (PANTHER) | IPR002885 (PROSITE_PROFILES) | IPR002885 (PROSITE_PROFILES) | IPR…	F:GO:0008270 | F:GO:0005515	F:zinc ion binding
	VvCarFPS02VCR702_v1_PsGc_1018.ver1_0.g007740.m01	VvCarFPS02VCR702_v1_PsGc_1018.ver1_0.g007740	0	transferring glycosyl group transferase	C:GO:0016020	C:membrane	0	0	IPR006740 (PFAM) | G3DSA:3.90.550.50 (GENE3D) | PTHR10811:SF27 (PANTHER) | PTHR10811 (PANTHER) | TMhelix (TMHMM)	no GO terms	no GO terms
	VvCarFPS02VCR702_v1_PsGc_1018.ver1_0.g007750.m01	VvCarFPS02VCR702_v1_PsGc_1018.ver1_0.g007750	0	homeobox BEL1 homolog	C:GO:0005634 | F:GO:0003677 | P:GO:0009058 | P:GO:0006139	C:nucleus | F:DNA binding | P:biosynthetic process | P:nucleobase-containing compound metabolic process	0	0	Coil (COILS) | IPR001356 (SMART) | IPR006563 (SMART) | G3DSA:1.10.10.60 (GENE3D) | IPR008422 (PFAM) | IPR006563 (PFAM) | mobidb-lite (MOBIDB_LITE) | mobidb-lite (MOBIDB_LITE) | mobidb-lite (MOBIDB_LITE) | PTHR11850:SF66 (PANTHER) | PTHR11850 (PANTHER) | IPR001356 (PROSITE_PROFILES) | IPR001356 (CDD) | IPR009057 (SUPERFAMILY)	F:GO:0003677 | P:GO:0006355	F:DNA binding
	VvCarFPS02VCR702_v1_PsGc_1018.ver1_0.g007760.m01	VvCarFPS02VCR702_v1_PsGc_1018.ver1_0.g007760	0	phosphoglycerate mutase AT74H	F:GO:0003824 | P:GO:0008152 | C:GO:0005829	F:catalytic activity | P:metabolic process | C:cytosol	0	0	IPR013078 (SMART) | IPR013078 (PFAM) | IPR029033 (G3DSA:3.40.50.GENE3D) | PIRSF000709 (PIRSF) | PTHR23029 (PANTHER) | PTHR23029:SF18 (PANTHER) | IPR001345 (PROSITE_PATTERNS) | IPR013078 (CDD) | IPR029033 (SUPERFAMILY)	F:GO:0003824 | P:GO:0008152	F:catalytic activity
	VvCarFPS02VCR702_v1_PsGc_1018.ver1_0.g007770.m01	VvCarFPS02VCR702_v1_PsGc_1018.ver1_0.g007770	0	tropinone reductase homolog At5g06060-like	0	0	0	0	no IPS match	no IPS match	no IPS match
	VvCarFPS02VCR702_v1_PsGc_1018.ver1_0.g007780.m01	VvCarFPS02VCR702_v1_PsGc_1018.ver1_0.g007780	0	uncharacterized protein LOC109825485	0	0	0	0	mobidb-lite (MOBIDB_LITE) | mobidb-lite (MOBIDB_LITE) | mobidb-lite (MOBIDB_LITE) | PTHR34536 (PANTHER)	no GO terms	no GO terms
	VvCarFPS02VCR702_v1_PsGc_1018.ver1_0.g007790.m01	VvCarFPS02VCR702_v1_PsGc_1018.ver1_0.g007790	0	dentin sialophospho	0	0	0	0	mobidb-lite (MOBIDB_LITE) | mobidb-lite (MOBIDB_LITE) | mobidb-lite (MOBIDB_LITE) | mobidb-lite (MOBIDB_LITE) | mobidb-lite (MOBIDB_LITE) | mobidb-lite (MOBIDB_LITE) | mobidb-lite (MOBIDB_LITE) | mobidb-lite (MOBIDB_LITE) | PTHR34536:SF3 (PANTHER) | PTHR34536 (PANTHER)	no GO terms	no GO terms
	VvCarFPS02VCR702_v1_PsGc_1018.ver1_0.g007800.m01	VvCarFPS02VCR702_v1_PsGc_1018.ver1_0.g007800	0	BTB POZ domain-containing	F:GO:0005515 | P:GO:0006464	F:protein binding | P:cellular protein modification process	0	0	G3DSA:3.30.710.10 (GENE3D) | mobidb-lite (MOBIDB_LITE) | mobidb-lite (MOBIDB_LITE) | PTHR31060 (PANTHER) | PTHR31060:SF3 (PANTHER) | IPR000210 (PROSITE_PROFILES) | SignalP-TM (SIGNALP_GRAM_POSITIVE)	F:GO:0005515	F:protein binding
	VvCarFPS02VCR702_v1_PsGc_1018.ver1_0.g007810.m01	VvCarFPS02VCR702_v1_PsGc_1018.ver1_0.g007810	0	E3 ubiquitin- ligase RHA1B-like	F:GO:0005488 | F:GO:0016740	F:binding | F:transferase activity	0	0	IPR011016 (SMART) | IPR001841 (SMART) | IPR001841 (PFAM) | IPR013083 (G3DSA:3.30.40.GENE3D) | PTHR14155:SF463 (PANTHER) | PTHR14155 (PANTHER) | IPR001841 (PROSITE_PROFILES) | cd16448 (CDD) | SSF57850 (SUPERFAMILY)	F:GO:0008270	F:zinc ion binding
	VvCarFPS02VCR702_v1_PsGc_1018.ver1_0.g007820.m01	VvCarFPS02VCR702_v1_PsGc_1018.ver1_0.g007820	0	PLAC8 family	C:GO:0016020	C:membrane	0	0	mobidb-lite (MOBIDB_LITE) | PTHR31152 (PANTHER) | PTHR31152:SF6 (PANTHER) | TMhelix (TMHMM)	no GO terms	no GO terms
	VvCarFPS02VCR702_v1_PsGc_1018.ver1_0.g007830.m01	VvCarFPS02VCR702_v1_PsGc_1018.ver1_0.g007830	0	CCT motif	C:GO:0005634 | F:GO:0005515	C:nucleus | F:protein binding	0	0	IPR010402 (PFAM) | PTHR31319 (PANTHER) | PTHR31319:SF20 (PANTHER) | IPR010402 (PROSITE_PROFILES)	F:GO:0005515	F:protein binding
	VvCarFPS02VCR702_v1_PsGc_1018.ver1_0.g007840.m01	VvCarFPS02VCR702_v1_PsGc_1018.ver1_0.g007840	0	DNA repair helicase XPB1-like	F:GO:0000166 | F:GO:0003677 | P:GO:0009058 | P:GO:0006259 | P:GO:0006950 | C:GO:0005622 | F:GO:0016787	F:nucleotide binding | F:DNA binding | P:biosynthetic process | P:DNA metabolic process | P:response to stress | C:intracellular | F:hydrolase activity	EC:3.6.1.3 | EC:3.6.1.15	Adenosinetriphosphatase | Nucleoside-triphosphate phosphatase	PR00851 (PRINTS) | IPR001650 (SMART) | IPR014001 (SMART) | G3DSA:3.40.50.300 (GENE3D) | IPR001161 (TIGRFAM) | IPR032830 (PFAM) | G3DSA:3.40.50.300 (GENE3D) | IPR032438 (PFAM) | IPR006935 (PFAM) | mobidb-lite (MOBIDB_LITE) | PTHR11274:SF0 (PANTHER) | PTHR11274 (PANTHER) | IPR001650 (PROSITE_PROFILES) | IPR014001 (PROSITE_PROFILES) | IPR001650 (CDD) | cd00046 (CDD) | IPR027417 (SUPERFAMILY) | IPR02…	F:GO:0003677 | F:GO:0005524 | P:GO:0006289 | F:GO:0004003 | P:GO:0006367 | F:GO:0016787	F:DNA binding	P:nucleotide-excision repair	F:ATP-dependent DNA helicase activity	P:transcription initiation from RNA polymerase II promoter	F:hydrolase activity
	VvCarFPS02VCR702_v1_PsGc_1018.ver1_0.g007850.m01	VvCarFPS02VCR702_v1_PsGc_1018.ver1_0.g007850	0	beta-adaptin C	F:GO:0003676 | C:GO:0005737 | C:GO:0016020 | P:GO:0006810	F:nucleic acid binding | C:cytoplasm | C:membrane | P:transport	0	0	IPR000504 (SMART) | IPR008152 (SMART) | IPR015151 (SMART) | IPR013037 (G3DSA:2.60.40.GENE3D) | IPR015151 (PFAM) | IPR008152 (PFAM) | IPR012677 (G3DSA:3.30.70.GENE3D) | IPR011989 (G3DSA:1.25.10.GENE3D) | IPR012295 (G3DSA:3.30.310.GENE3D) | IPR002553 (PFAM) | IPR000504 (PFAM) | mobidb-lite (MOBIDB_LITE) | mobidb-lite (MOBIDB_LITE) | PTHR11134:SF3 (PANTHER) | IPR026739 (PANTHER) | IPR000504 (PROSITE…	F:GO:0003676 | C:GO:0030117 | P:GO:0016192 | C:GO:0030131 | P:GO:0006886 | F:GO:0005488	F:nucleic acid binding	P:vesicle-mediated transport	C:clathrin adaptor complex	P:intracellular protein transport	F:binding
	VvCarFPS02VCR702_v1_PsGc_1018.ver1_0.g007860.m01	VvCarFPS02VCR702_v1_PsGc_1018.ver1_0.g007860	0	histone deacetylase complex subunit	F:GO:0005515 | C:GO:0005654	F:protein binding | C:nucleoplasm	0	0	IPR038291 (G3DSA:1.10.720.GENE3D) | IPR025718 (PFAM) | mobidb-lite (MOBIDB_LITE) | mobidb-lite (MOBIDB_LITE) | IPR024145 (PANTHER) | PTHR13286:SF8 (PANTHER)	F:GO:0005515	F:protein binding
	VvCarFPS02VCR702_v1_PsGc_1018.ver1_0.g007870.m01	VvCarFPS02VCR702_v1_PsGc_1018.ver1_0.g007870	0	ubiquitin-conjugating enzyme E2	C:GO:0005737	C:cytoplasm	0	0	SM00212 (SMART) | IPR000608 (PFAM) | IPR016135 (G3DSA:3.10.110.GENE3D) | mobidb-lite (MOBIDB_LITE) | PTHR43946 (PANTHER) | PTHR43946:SF3 (PANTHER) | IPR023313 (PROSITE_PATTERNS) | IPR000608 (PROSITE_PROFILES) | IPR000608 (CDD) | IPR016135 (SUPERFAMILY)	no GO terms	no GO terms
	VvCarFPS02VCR702_v1_PsGc_1018.ver1_0.g007880.m01	VvCarFPS02VCR702_v1_PsGc_1018.ver1_0.g007880	0	AT-rich interactive domain-containing 1-like	F:GO:0003677	F:DNA binding	0	0	IPR000949 (SMART) | mobidb-lite (MOBIDB_LITE) | PTHR22970 (PANTHER) | PTHR22970:SF23 (PANTHER) | IPR000949 (PROSITE_PROFILES) | IPR001005 (CDD)	no GO terms	no GO terms
	VvCarFPS02VCR702_v1_PsGc_1018.ver1_0.g007890.m01	VvCarFPS02VCR702_v1_PsGc_1018.ver1_0.g007890	0	hypothetical protein CICLE_v10019313mg	0	0	0	0	no IPS match	no IPS match	no IPS match
	VvCarFPS02VCR702_v1_PsGc_1018.ver1_0.g007900.m01	VvCarFPS02VCR702_v1_PsGc_1018.ver1_0.g007900	0	AT-rich interactive domain-containing 2-like	0	0	0	0	no IPS match	no IPS match	no IPS match
	VvCarFPS02VCR702_v1_PsGc_1018.ver1_0.g007910.m01	VvCarFPS02VCR702_v1_PsGc_1018.ver1_0.g007910	0	double-stranded DNA-binding family	F:GO:0003677	F:DNA binding	0	0	IPR036883 (G3DSA:1.10.8.GENE3D) | IPR002836 (PFAM) | mobidb-lite (MOBIDB_LITE) | IPR002836 (PANTHER) | IPR036883 (SUPERFAMILY)	F:GO:0003677	F:DNA binding
	VvCarFPS02VCR702_v1_PsGc_1018.ver1_0.g007920.m01	VvCarFPS02VCR702_v1_PsGc_1018.ver1_0.g007920	0	probable E3 ubiquitin- ligase RHB1A	F:GO:0005488	F:binding	0	0	PTHR22937 (PANTHER) | PTHR22937:SF49 (PANTHER)	no GO terms	no GO terms
	VvCarFPS02VCR702_v1_PsGc_1018.ver1_0.g007930.m01	VvCarFPS02VCR702_v1_PsGc_1018.ver1_0.g007930	0	octicosapeptide phox Bem1p domain kinase superfamily	0	0	0	0	PTHR45513 (PANTHER)	no GO terms	no GO terms
	VvCarFPS02VCR702_v1_PsGc_1018.ver1_0.g007940.m01	VvCarFPS02VCR702_v1_PsGc_1018.ver1_0.g007940	0	NPGR1 isoform X1	0	0	0	0	PTHR44102:SF4 (PANTHER) | PTHR44102 (PANTHER) | SignalP-noTM (SIGNALP_EUK)	no GO terms	no GO terms
	VvCarFPS02VCR702_v1_PsGc_1018.ver1_0.g007950.m01	VvCarFPS02VCR702_v1_PsGc_1018.ver1_0.g007950	0	hypothetical protein PRUPE_ppb020741mg	0	0	0	0	mobidb-lite (MOBIDB_LITE)	no GO terms	no GO terms
	VvCarFPS02VCR702_v1_PsGc_1018.ver1_0.g007960.m01	VvCarFPS02VCR702_v1_PsGc_1018.ver1_0.g007960	0	uncharacterized protein LOC109793653	0	0	0	0	G3DSA:3.30.70.270 (GENE3D) | IPR000477 (PFAM) | PTHR24559 (PANTHER) | IPR000477 (PROSITE_PROFILES) | cd01647 (CDD) | SSF56672 (SUPERFAMILY)	no GO terms	no GO terms
	VvCarFPS02VCR702_v1_PsGc_1019.ver1_0.g007970.m01	VvCarFPS02VCR702_v1_PsGc_1019.ver1_0.g007970	0	pentatricopeptide repeat-containing mitochondrial	F:GO:0005515 | C:GO:0005622	F:protein binding | C:intracellular	0	0	IPR002885 (PFAM) | IPR002885 (TIGRFAM) | IPR011990 (G3DSA:1.25.40.GENE3D) | IPR002885 (PFAM) | IPR011990 (G3DSA:1.25.40.GENE3D) | IPR011990 (G3DSA:1.25.40.GENE3D) | PTHR24015 (PANTHER) | PTHR24015:SF927 (PANTHER) | IPR002885 (PROSITE_PROFILES) | IPR002885 (PROSITE_PROFILES) | IPR002885 (PROSITE_PROFILES) | IPR002885 (PROSITE_PROFILES) | IPR002885 (PROSITE_PROFILES) | IPR002885 (PROSITE_PROFILES) …	F:GO:0005515	F:protein binding
	VvCarFPS02VCR702_v1_PsGc_1019.ver1_0.g007980.m01	VvCarFPS02VCR702_v1_PsGc_1019.ver1_0.g007980	0	U4 U6 small nuclear ribonucleo PRP4	0	0	0	0	IPR027106 (PANTHER)	no GO terms	no GO terms
	VvCarFPS02VCR702_v1_PsGc_1019.ver1_0.g007990.m01	VvCarFPS02VCR702_v1_PsGc_1019.ver1_0.g007990	0	LURP-one (DUF567)	C:GO:0016020	C:membrane	0	0	IPR038595 (G3DSA:3.20.90.GENE3D) | IPR007612 (PFAM) | IPR007612 (PANTHER) | PTHR31087:SF11 (PANTHER) | IPR025659 (SUPERFAMILY)	no GO terms	no GO terms
	VvCarFPS02VCR702_v1_PsGc_1019.ver1_0.g008000.m01	VvCarFPS02VCR702_v1_PsGc_1019.ver1_0.g008000	0	LURP-one (DUF567)	C:GO:0016020	C:membrane	0	0	IPR007612 (PFAM) | IPR038595 (G3DSA:3.20.90.GENE3D) | IPR007612 (PANTHER) | PTHR31087:SF11 (PANTHER) | IPR025659 (SUPERFAMILY)	no GO terms	no GO terms
	VvCarFPS02VCR702_v1_PsGc_1019.ver1_0.g008010.m01	VvCarFPS02VCR702_v1_PsGc_1019.ver1_0.g008010	0	LURP-one (DUF567)	C:GO:0016020	C:membrane	0	0	IPR038595 (G3DSA:3.20.90.GENE3D) | IPR007612 (PFAM) | PTHR31087:SF11 (PANTHER) | IPR007612 (PANTHER) | IPR025659 (SUPERFAMILY)	no GO terms	no GO terms
	VvCarFPS02VCR702_v1_PsGc_1019.ver1_0.g008020.m01	VvCarFPS02VCR702_v1_PsGc_1019.ver1_0.g008020	0	target of Myb 1-like	P:GO:0006810 | C:GO:0005622	P:transport | C:intracellular	0	0	IPR002014 (SMART) | IPR008942 (G3DSA:1.25.40.GENE3D) | IPR004152 (PFAM) | IPR002014 (PFAM) | IPR038425 (G3DSA:1.20.58.GENE3D) | mobidb-lite (MOBIDB_LITE) | mobidb-lite (MOBIDB_LITE) | mobidb-lite (MOBIDB_LITE) | mobidb-lite (MOBIDB_LITE) | PTHR13856:SF131 (PANTHER) | PTHR13856 (PANTHER) | IPR002014 (PROSITE_PROFILES) | IPR004152 (PROSITE_PROFILES) | cd14231 (CDD) | cd03561 (CDD) | SignalP-TM (SIG…	P:GO:0006886 | C:GO:0005622	P:intracellular protein transport
	VvCarFPS02VCR702_v1_PsGc_1019.ver1_0.g008030.m01	VvCarFPS02VCR702_v1_PsGc_1019.ver1_0.g008030	0	regulatory-associated of TOR 2 (RAPTOR2)	F:GO:0005515 | C:GO:0005737 | P:GO:0007165	F:protein binding | C:cytoplasm | P:signal transduction	0	0	PR01547 (PRINTS) | IPR029347 (SMART) | IPR001680 (SMART) | IPR011989 (G3DSA:1.25.10.GENE3D) | PF13646 (PFAM) | IPR015943 (G3DSA:2.130.10.GENE3D) | IPR029347 (PFAM) | IPR001680 (PFAM) | mobidb-lite (MOBIDB_LITE) | mobidb-lite (MOBIDB_LITE) | PTHR12848:SF16 (PANTHER) | IPR004083 (PANTHER) | IPR017986 (PROSITE_PROFILES) | IPR036322 (SUPERFAMILY) | IPR016024 (SUPERFAMILY)	F:GO:0005515 | P:GO:0031929 | F:GO:0005488 | C:GO:0031931	F:protein binding	F:binding	C:TORC1 complex
	VvCarFPS02VCR702_v1_PsGc_102.ver1_0.g008040.m01	VvCarFPS02VCR702_v1_PsGc_102.ver1_0.g008040	0	hypothetical protein SELMODRAFT_271571	0	0	0	0	no IPS match	no IPS match	no IPS match
	VvCarFPS02VCR702_v1_PsGc_102.ver1_0.g008050.m01	VvCarFPS02VCR702_v1_PsGc_102.ver1_0.g008050	0	membrane type	C:GO:0016020	C:membrane	0	0	PTHR37735 (PANTHER) | SignalP-noTM (SIGNALP_EUK) | SignalP-noTM (SIGNALP_GRAM_NEGATIVE) | SignalP-TM (SIGNALP_GRAM_POSITIVE) | TMhelix (TMHMM)	no GO terms	no GO terms
	VvCarFPS02VCR702_v1_PsGc_102.ver1_0.g008060.m01	VvCarFPS02VCR702_v1_PsGc_102.ver1_0.g008060	0	NADH dehydrogenase ubiquinone complex assembly factor (DUF185)	0	0	0	0	PTHR12049:SF5 (PANTHER) | IPR003788 (PANTHER)	no GO terms	no GO terms
	VvCarFPS02VCR702_v1_PsGc_1020.ver1_0.g008070.m01	VvCarFPS02VCR702_v1_PsGc_1020.ver1_0.g008070	0	CELLULOSE SYNTHASE INTERACTIVE 3	0	0	0	0	PTHR23315:SF135 (PANTHER) | PTHR23315 (PANTHER)	no GO terms	no GO terms
	VvCarFPS02VCR702_v1_PsGc_1020.ver1_0.g008080.m01	VvCarFPS02VCR702_v1_PsGc_1020.ver1_0.g008080	0	CELLULOSE SYNTHASE INTERACTIVE 3	0	0	0	0	PTHR23315 (PANTHER) | PTHR23315:SF135 (PANTHER)	no GO terms	no GO terms
	VvCarFPS02VCR702_v1_PsGc_1021.ver1_0.g008090.m01	VvCarFPS02VCR702_v1_PsGc_1021.ver1_0.g008090	0	Werner Syndrome-like exonuclease	F:GO:0003676 | F:GO:0004518	F:nucleic acid binding | F:nuclease activity	0	0	IPR002562 (SMART) | IPR002562 (PFAM) | IPR036397 (G3DSA:3.30.420.GENE3D) | mobidb-lite (MOBIDB_LITE) | mobidb-lite (MOBIDB_LITE) | PTHR13620 (PANTHER) | PTHR13620:SF19 (PANTHER) | PTHR13620 (PANTHER) | cd06141 (CDD) | IPR012337 (SUPERFAMILY)	F:GO:0003676 | F:GO:0008408 | P:GO:0006139	F:nucleic acid binding	P:nucleobase-containing compound metabolic process
	VvCarFPS02VCR702_v1_PsGc_1021.ver1_0.g008100.m01	VvCarFPS02VCR702_v1_PsGc_1021.ver1_0.g008100	0	UDP-glucuronate 4-epimerase 6-like	P:GO:0005975 | F:GO:0003824 | C:GO:0016020 | F:GO:0005488	P:carbohydrate metabolic process | F:catalytic activity | C:membrane | F:binding	0	0	IPR008089 (PRINTS) | G3DSA:3.90.25.10 (GENE3D) | G3DSA:3.40.50.720 (GENE3D) | IPR001509 (PFAM) | PTHR43574:SF19 (PANTHER) | PTHR43574 (PANTHER) | IPR036291 (SUPERFAMILY) | TMhelix (TMHMM)	P:GO:0005975 | F:GO:0016857 | F:GO:0050662 | F:GO:0003824	P:carbohydrate metabolic process	F:coenzyme binding	F:catalytic activity
	VvCarFPS02VCR702_v1_PsGc_1021.ver1_0.g008110.m01	VvCarFPS02VCR702_v1_PsGc_1021.ver1_0.g008110	0	glycine-rich RNA-binding mitochondrial-like	F:GO:0003676	F:nucleic acid binding	0	0	IPR000504 (SMART) | IPR012677 (G3DSA:3.30.70.GENE3D) | IPR000504 (PFAM) | PTHR44202 (PANTHER) | PTHR44202:SF2 (PANTHER) | IPR000504 (PROSITE_PROFILES) | IPR035979 (SUPERFAMILY)	F:GO:0003676	F:nucleic acid binding
	VvCarFPS02VCR702_v1_PsGc_1021.ver1_0.g008120.m01	VvCarFPS02VCR702_v1_PsGc_1021.ver1_0.g008120	0	pentatricopeptide repeat-containing chloroplastic	F:GO:0005515 | C:GO:0005622	F:protein binding | C:intracellular	0	0	IPR002885 (PFAM) | IPR032867 (PFAM) | IPR011990 (G3DSA:1.25.40.GENE3D) | IPR011990 (G3DSA:1.25.40.GENE3D) | IPR002885 (PFAM) | IPR002885 (TIGRFAM) | PTHR24015:SF476 (PANTHER) | PTHR24015 (PANTHER) | IPR002885 (PROSITE_PROFILES) | IPR002885 (PROSITE_PROFILES) | IPR002885 (PROSITE_PROFILES) | IPR002885 (PROSITE_PROFILES) | IPR002885 (PROSITE_PROFILES) | IPR002885 (PROSITE_PROFILES) | IPR002885 (PRO…	F:GO:0008270 | F:GO:0005515	F:zinc ion binding
	VvCarFPS02VCR702_v1_PsGc_1021.ver1_0.g008130.m01	VvCarFPS02VCR702_v1_PsGc_1021.ver1_0.g008130	0	AMP deaminase	P:GO:0009058 | P:GO:0044711 | P:GO:0006139 | F:GO:0016787	P:biosynthetic process | P:single-organism biosynthetic process | P:nucleobase-containing compound metabolic process | F:hydrolase activity	EC:3.5.4.17 | EC:3.5.4.6	Adenosine-phosphate deaminase | AMP deaminase	G3DSA:3.20.20.140 (GENE3D) | IPR001365 (PFAM) | IPR006329 (PANTHER) | PTHR11359:SF9 (PANTHER) | SignalP-noTM (SIGNALP_EUK) | IPR032466 (SUPERFAMILY)	F:GO:0003876 | P:GO:0032264 | F:GO:0019239	F:AMP deaminase activity	F:deaminase activity
	VvCarFPS02VCR702_v1_PsGc_1021.ver1_0.g008140.m01	VvCarFPS02VCR702_v1_PsGc_1021.ver1_0.g008140	0	LST8-like protein	0	0	0	0	SignalP-noTM (SIGNALP_EUK) | TMhelix (TMHMM)	no GO terms	no GO terms
	VvCarFPS02VCR702_v1_PsGc_1021.ver1_0.g008150.m01	VvCarFPS02VCR702_v1_PsGc_1021.ver1_0.g008150	0	myb X	F:GO:0016787	F:hydrolase activity	EC:3.6.1.15	Nucleoside-triphosphate phosphatase	Coil (COILS) | mobidb-lite (MOBIDB_LITE) | PTHR34660:SF1 (PANTHER) | PTHR34660 (PANTHER) | PTHR34660:SF1 (PANTHER)	no GO terms	no GO terms
	VvCarFPS02VCR702_v1_PsGc_1021.ver1_0.g008160.m01	VvCarFPS02VCR702_v1_PsGc_1021.ver1_0.g008160	0	HXXXD-type acyl-transferase family	F:GO:0016740	F:transferase activity	0	0	IPR023213 (G3DSA:3.30.559.GENE3D) | IPR003480 (PFAM) | IPR023213 (G3DSA:3.30.559.GENE3D) | PTHR31642:SF22 (PANTHER) | PTHR31642 (PANTHER)	F:GO:0016747	F:transferase activity, transferring acyl groups other than amino-acyl groups
	VvCarFPS02VCR702_v1_PsGc_1021.ver1_0.g008170.m01	VvCarFPS02VCR702_v1_PsGc_1021.ver1_0.g008170	0	BAH and TFIIS domain-containing	C:GO:0005634	C:nucleus	0	0	IPR003617 (SMART) | IPR035441 (G3DSA:1.20.930.GENE3D) | IPR017923 (PFAM) | PTHR15141:SF51 (PANTHER) | PTHR15141 (PANTHER) | IPR017923 (PROSITE_PROFILES) | IPR035441 (SUPERFAMILY)	C:GO:0005634	C:nucleus
	VvCarFPS02VCR702_v1_PsGc_1021.ver1_0.g008180.m01	VvCarFPS02VCR702_v1_PsGc_1021.ver1_0.g008180	0	pentatricopeptide repeat-containing	F:GO:0005515 | C:GO:0005622	F:protein binding | C:intracellular	0	0	IPR011990 (G3DSA:1.25.40.GENE3D) | IPR011990 (G3DSA:1.25.40.GENE3D) | IPR002885 (TIGRFAM) | IPR002885 (PFAM) | IPR002885 (PFAM) | IPR011990 (G3DSA:1.25.40.GENE3D) | PTHR24015:SF858 (PANTHER) | PTHR24015 (PANTHER) | IPR002885 (PROSITE_PROFILES) | IPR002885 (PROSITE_PROFILES) | IPR002885 (PROSITE_PROFILES) | IPR002885 (PROSITE_PROFILES) | IPR002885 (PROSITE_PROFILES) | IPR002885 (PROSITE_PROFILES) …	F:GO:0005515	F:protein binding
	VvCarFPS02VCR702_v1_PsGc_1021.ver1_0.g008190.m01	VvCarFPS02VCR702_v1_PsGc_1021.ver1_0.g008190	0	chaperone dnaJ chloroplastic-like	C:GO:0009536	C:plastid	0	0	IPR001623 (PRINTS) | IPR001623 (SMART) | IPR001623 (PFAM) | IPR036869 (G3DSA:1.10.287.GENE3D) | PTHR45090 (PANTHER) | IPR018253 (PROSITE_PATTERNS) | IPR001623 (PROSITE_PROFILES) | IPR001623 (CDD) | IPR036869 (SUPERFAMILY)	no GO terms	no GO terms
	VvCarFPS02VCR702_v1_PsGc_1021.ver1_0.g008200.m01	VvCarFPS02VCR702_v1_PsGc_1021.ver1_0.g008200	0	RNA-binding (RRM RBD RNP motif) family	0	0	0	0	mobidb-lite (MOBIDB_LITE) | mobidb-lite (MOBIDB_LITE) | PTHR45275 (PANTHER)	no GO terms	no GO terms
	VvCarFPS02VCR702_v1_PsGc_1021.ver1_0.g008210.m01	VvCarFPS02VCR702_v1_PsGc_1021.ver1_0.g008210	0	amino-acid permease BAT1 homolog	C:GO:0016020 | P:GO:0006810 | F:GO:0005215	C:membrane | P:transport | F:transporter activity	0	0	IPR002293 (PFAM) | PTHR11785 (PANTHER) | PTHR11785:SF286 (PANTHER) | TMhelix (TMHMM) | TMhelix (TMHMM)	P:GO:0055085 | F:GO:0022857 | C:GO:0016020	P:transmembrane transport	C:membrane
	VvCarFPS02VCR702_v1_PsGc_1021.ver1_0.g008220.m01	VvCarFPS02VCR702_v1_PsGc_1021.ver1_0.g008220	0	small subunit processome component 20 homolog	0	0	0	0	PTHR17695 (PANTHER)	no GO terms	no GO terms
	VvCarFPS02VCR702_v1_PsGc_1021.ver1_0.g008230.m01	VvCarFPS02VCR702_v1_PsGc_1021.ver1_0.g008230	0	small subunit processome component 20 homolog	F:GO:0005488 | C:GO:0005622	F:binding | C:intracellular	0	0	IPR011430 (PFAM) | PTHR17695 (PANTHER) | SignalP-noTM (SIGNALP_EUK) | IPR016024 (SUPERFAMILY) | IPR016024 (SUPERFAMILY) | IPR016024 (SUPERFAMILY)	F:GO:0005488	F:binding
	VvCarFPS02VCR702_v1_PsGc_1021.ver1_0.g008240.m01	VvCarFPS02VCR702_v1_PsGc_1021.ver1_0.g008240	0	probable magnesium transporter NIPA4	C:GO:0005768 | C:GO:0016020 | P:GO:0006810 | F:GO:0005215	C:endosome | C:membrane | P:transport | F:transporter activity	0	0	IPR008521 (PFAM) | IPR008521 (PANTHER) | PTHR12570:SF20 (PANTHER) | SSF103481 (SUPERFAMILY) | TMhelix (TMHMM) | TMhelix (TMHMM) | TMhelix (TMHMM) | TMhelix (TMHMM) | TMhelix (TMHMM) | TMhelix (TMHMM) | TMhelix (TMHMM) | TMhelix (TMHMM) | TMhelix (TMHMM)	P:GO:0015693 | C:GO:0016021 | F:GO:0015095	P:magnesium ion transport	F:magnesium ion transmembrane transporter activity
	VvCarFPS02VCR702_v1_PsGc_1021.ver1_0.g008250.m01	VvCarFPS02VCR702_v1_PsGc_1021.ver1_0.g008250	0	chromatin assembly factor 1 subunit FSM	F:GO:0016740	F:transferase activity	0	0	Coil (COILS) | mobidb-lite (MOBIDB_LITE) | PTHR37076 (PANTHER) | PTHR37076:SF1 (PANTHER)	no GO terms	no GO terms
	VvCarFPS02VCR702_v1_PsGc_1021.ver1_0.g008260.m01	VvCarFPS02VCR702_v1_PsGc_1021.ver1_0.g008260	0	RNA-directed DNA polymerase (reverse transcriptase)-related family	P:GO:0009058 | F:GO:0016740 | P:GO:0006259	P:biosynthetic process | F:transferase activity | P:DNA metabolic process	EC:2.7.7.49	RNA-directed DNA polymerase	PTHR36037 (PANTHER)	no GO terms	no GO terms
	VvCarFPS02VCR702_v1_PsGc_1021.ver1_0.g008270.m01	VvCarFPS02VCR702_v1_PsGc_1021.ver1_0.g008270	0	RING U-box superfamily	0	0	0	0	IPR001841 (SMART) | PF13923 (PFAM) | IPR013083 (G3DSA:3.30.40.GENE3D) | mobidb-lite (MOBIDB_LITE) | PTHR23041 (PANTHER) | PTHR23041:SF63 (PANTHER) | IPR017907 (PROSITE_PATTERNS) | IPR001841 (PROSITE_PROFILES) | SSF57850 (SUPERFAMILY)	no GO terms	no GO terms
	VvCarFPS02VCR702_v1_PsGc_1022.ver1_0.g008280.m01	VvCarFPS02VCR702_v1_PsGc_1022.ver1_0.g008280	0	Disease resistance (TIR-NBS-LRR class) family	0	0	0	0	IPR032675 (G3DSA:3.80.10.GENE3D) | mobidb-lite (MOBIDB_LITE) | PTHR34630 (PANTHER)	no GO terms	no GO terms
	VvCarFPS02VCR702_v1_PsGc_1022.ver1_0.g008290.m01	VvCarFPS02VCR702_v1_PsGc_1022.ver1_0.g008290	0	downstream neighbor of Son	0	0	0	0	IPR024861 (PANTHER)	no GO terms	no GO terms
	VvCarFPS02VCR702_v1_PsGc_1022.ver1_0.g008300.m01	VvCarFPS02VCR702_v1_PsGc_1022.ver1_0.g008300	0	disease resistance (TIR-NBS-LRR class)	F:GO:0000166 | F:GO:0005515 | P:GO:0007165	F:nucleotide binding | F:protein binding | P:signal transduction	0	0	Coil (COILS) | PR00364 (PRINTS) | IPR000157 (SMART) | IPR002182 (PFAM) | IPR000157 (PFAM) | IPR032675 (G3DSA:3.80.10.GENE3D) | G3DSA:3.40.50.300 (GENE3D) | G3DSA:1.10.8.430 (GENE3D) | IPR035897 (G3DSA:3.40.50.GENE3D) | PTHR11017 (PANTHER) | IPR000157 (PROSITE_PROFILES) | IPR027417 (SUPERFAMILY) | SSF52058 (SUPERFAMILY) | IPR036390 (SUPERFAMILY) | IPR035897 (SUPERFAMILY)	F:GO:0005515 | P:GO:0007165 | F:GO:0043531	F:protein binding	F:ADP binding
	VvCarFPS02VCR702_v1_PsGc_1022.ver1_0.g008310.m01	VvCarFPS02VCR702_v1_PsGc_1022.ver1_0.g008310	0	TMV resistance N	0	0	0	0	IPR032675 (G3DSA:3.80.10.GENE3D) | mobidb-lite (MOBIDB_LITE) | PTHR34630 (PANTHER) | SSF52058 (SUPERFAMILY)	no GO terms	no GO terms
	VvCarFPS02VCR702_v1_PsGc_1022.ver1_0.g008320.m01	VvCarFPS02VCR702_v1_PsGc_1022.ver1_0.g008320	0	downstream neighbor of Son	0	0	0	0	SignalP-noTM (SIGNALP_EUK)	no GO terms	no GO terms
	VvCarFPS02VCR702_v1_PsGc_1022.ver1_0.g008330.m01	VvCarFPS02VCR702_v1_PsGc_1022.ver1_0.g008330	0	methyltransferase 13	P:GO:0008152 | F:GO:0016740	P:metabolic process | F:transferase activity	0	0	G3DSA:3.40.50.150 (GENE3D) | IPR013216 (PFAM) | mobidb-lite (MOBIDB_LITE) | PTHR12176 (PANTHER) | PTHR12176:SF18 (PANTHER) | cd02440 (CDD) | IPR029063 (SUPERFAMILY)	P:GO:0008152 | F:GO:0008168	P:metabolic process
	VvCarFPS02VCR702_v1_PsGc_1022.ver1_0.g008340.m01	VvCarFPS02VCR702_v1_PsGc_1022.ver1_0.g008340	0	Methyltransferase 13	F:GO:0016740	F:transferase activity	0	0	G3DSA:3.40.50.150 (GENE3D) | mobidb-lite (MOBIDB_LITE) | PTHR12176:SF34 (PANTHER) | PTHR12176 (PANTHER) | IPR029063 (SUPERFAMILY)	no GO terms	no GO terms
	VvCarFPS02VCR702_v1_PsGc_1022.ver1_0.g008350.m01	VvCarFPS02VCR702_v1_PsGc_1022.ver1_0.g008350	0	ROOT PRIMORDIUM DEFECTIVE 1	F:GO:0016787	F:hydrolase activity	0	0	IPR021099 (PFAM) | mobidb-lite (MOBIDB_LITE) | PTHR31476:SF32 (PANTHER) | PTHR31476 (PANTHER)	no GO terms	no GO terms
	VvCarFPS02VCR702_v1_PsGc_1022.ver1_0.g008360.m01	VvCarFPS02VCR702_v1_PsGc_1022.ver1_0.g008360	0	Methyltransferase 13	C:GO:0016020	C:membrane	0	0	G3DSA:3.40.50.150 (GENE3D) | mobidb-lite (MOBIDB_LITE) | mobidb-lite (MOBIDB_LITE) | PTHR12176 (PANTHER) | PTHR12176:SF34 (PANTHER) | IPR029063 (SUPERFAMILY)	no GO terms	no GO terms
	VvCarFPS02VCR702_v1_PsGc_1022.ver1_0.g008370.m01	VvCarFPS02VCR702_v1_PsGc_1022.ver1_0.g008370	0	RPM1-interacting 4-like	0	0	0	0	IPR008700 (PFAM) | mobidb-lite (MOBIDB_LITE) | PTHR33159 (PANTHER) | PTHR33159 (PANTHER) | PTHR33159:SF6 (PANTHER)	no GO terms	no GO terms
	VvCarFPS02VCR702_v1_PsGc_1022.ver1_0.g008380.m01	VvCarFPS02VCR702_v1_PsGc_1022.ver1_0.g008380	0	beta-galactosidase 15 isoform X2	P:GO:0005975 | P:GO:0009056 | P:GO:0006629 | P:GO:0044763 | F:GO:0030246 | C:GO:0005575 | P:GO:0009987 | F:GO:0016787 | P:GO:0044723	P:carbohydrate metabolic process | P:catabolic process | P:lipid metabolic process | P:single-organism cellular process | F:carbohydrate binding | C:cellular_component | P:cellular process | F:hydrolase activity | P:single-organism carbohydrate metabolic process	EC:3.2.1.23	Beta-galactosidase	IPR001944 (PRINTS) | IPR008979 (G3DSA:2.60.120.GENE3D) | IPR031330 (PFAM) | IPR000922 (PFAM) | IPR008979 (G3DSA:2.60.120.GENE3D) | PTHR23421:SF67 (PANTHER) | IPR001944 (PANTHER) | IPR000922 (PROSITE_PROFILES) | IPR017853 (SUPERFAMILY) | IPR008979 (SUPERFAMILY) | IPR008979 (SUPERFAMILY)	P:GO:0005975 | F:GO:0004553 | F:GO:0030246	P:carbohydrate metabolic process	F:carbohydrate binding
	VvCarFPS02VCR702_v1_PsGc_1022.ver1_0.g008390.m01	VvCarFPS02VCR702_v1_PsGc_1022.ver1_0.g008390	0	beta-galactosidase 8	P:GO:0005975 | F:GO:0016787	P:carbohydrate metabolic process | F:hydrolase activity	0	0	IPR001944 (PRINTS) | G3DSA:3.20.20.80 (GENE3D) | IPR031330 (PFAM) | IPR001944 (PANTHER) | PTHR23421:SF74 (PANTHER) | SignalP-noTM (SIGNALP_EUK) | SignalP-TM (SIGNALP_GRAM_POSITIVE) | IPR017853 (SUPERFAMILY) | TMhelix (TMHMM) | TMhelix (TMHMM)	P:GO:0005975 | F:GO:0004553	P:carbohydrate metabolic process
	VvCarFPS02VCR702_v1_PsGc_1022.ver1_0.g008400.m01	VvCarFPS02VCR702_v1_PsGc_1022.ver1_0.g008400	0	RING U-box superfamily	0	0	0	0	IPR001841 (SMART) | PF13923 (PFAM) | IPR013083 (G3DSA:3.30.40.GENE3D) | mobidb-lite (MOBIDB_LITE) | PTHR23041 (PANTHER) | PTHR23041:SF63 (PANTHER) | IPR017907 (PROSITE_PATTERNS) | IPR001841 (PROSITE_PROFILES) | SSF57850 (SUPERFAMILY)	no GO terms	no GO terms
	VvCarFPS02VCR702_v1_PsGc_1022.ver1_0.g008410.m01	VvCarFPS02VCR702_v1_PsGc_1022.ver1_0.g008410	0	RNA-directed DNA polymerase (reverse transcriptase)-related family	0	0	0	0	Coil (COILS) | PTHR36037 (PANTHER)	no GO terms	no GO terms
	VvCarFPS02VCR702_v1_PsGc_1022.ver1_0.g008420.m01	VvCarFPS02VCR702_v1_PsGc_1022.ver1_0.g008420	0	RNA-directed DNA polymerase (reverse transcriptase)-related family	0	0	0	0	PTHR36037 (PANTHER)	no GO terms	no GO terms
	VvCarFPS02VCR702_v1_PsGc_1022.ver1_0.g008430.m01	VvCarFPS02VCR702_v1_PsGc_1022.ver1_0.g008430	0	nuclear pore complex GP210 isoform X2	0	0	0	0	PTHR37076:SF1 (PANTHER) | PTHR37076 (PANTHER)	no GO terms	no GO terms
	VvCarFPS02VCR702_v1_PsGc_1022.ver1_0.g008440.m01	VvCarFPS02VCR702_v1_PsGc_1022.ver1_0.g008440	0	hypothetical protein POPTR_0017s08500g	F:GO:0016740	F:transferase activity	0	0	Coil (COILS) | Coil (COILS) | mobidb-lite (MOBIDB_LITE) | mobidb-lite (MOBIDB_LITE) | PTHR37076 (PANTHER) | PTHR37076:SF1 (PANTHER)	no GO terms	no GO terms
	VvCarFPS02VCR702_v1_PsGc_1022.ver1_0.g008450.m01	VvCarFPS02VCR702_v1_PsGc_1022.ver1_0.g008450	0	endochitinase A-like	0	0	0	0	PF14223 (PFAM) | PTHR11439 (PANTHER) | PTHR11439:SF232 (PANTHER)	no GO terms	no GO terms
	VvCarFPS02VCR702_v1_PsGc_1022.ver1_0.g008460.m01	VvCarFPS02VCR702_v1_PsGc_1022.ver1_0.g008460	0	probable magnesium transporter NIPA4	C:GO:0005768 | C:GO:0016020 | P:GO:0006810 | F:GO:0005215	C:endosome | C:membrane | P:transport | F:transporter activity	0	0	IPR008521 (PFAM) | IPR008521 (PANTHER) | PTHR12570:SF20 (PANTHER) | SSF103481 (SUPERFAMILY) | TMhelix (TMHMM) | TMhelix (TMHMM) | TMhelix (TMHMM) | TMhelix (TMHMM) | TMhelix (TMHMM) | TMhelix (TMHMM) | TMhelix (TMHMM) | TMhelix (TMHMM) | TMhelix (TMHMM) | TMhelix (TMHMM)	P:GO:0015693 | C:GO:0016021 | F:GO:0015095	P:magnesium ion transport	F:magnesium ion transmembrane transporter activity
	VvCarFPS02VCR702_v1_PsGc_1023.ver1_0.g008470.m01	VvCarFPS02VCR702_v1_PsGc_1023.ver1_0.g008470	0	probable S-acyltransferase 22	C:GO:0016020	C:membrane	0	0	IPR001594 (PFAM) | mobidb-lite (MOBIDB_LITE) | mobidb-lite (MOBIDB_LITE) | mobidb-lite (MOBIDB_LITE) | PTHR22883:SF119 (PANTHER) | PTHR22883 (PANTHER) | PS50216 (PROSITE_PROFILES) | TMhelix (TMHMM) | TMhelix (TMHMM) | TMhelix (TMHMM) | TMhelix (TMHMM)	no GO terms	no GO terms
	VvCarFPS02VCR702_v1_PsGc_1023.ver1_0.g008480.m01	VvCarFPS02VCR702_v1_PsGc_1023.ver1_0.g008480	0	mitotic checkpoint	F:GO:0005515	F:protein binding	0	0	IPR001680 (SMART) | IPR001680 (PFAM) | IPR015943 (G3DSA:2.130.10.GENE3D) | PTHR10971 (PANTHER) | PTHR10971:SF17 (PANTHER) | IPR019775 (PROSITE_PATTERNS) | IPR017986 (PROSITE_PROFILES) | IPR001680 (PROSITE_PROFILES) | IPR036322 (SUPERFAMILY)	F:GO:0005515	F:protein binding
	VvCarFPS02VCR702_v1_PsGc_1023.ver1_0.g008490.m01	VvCarFPS02VCR702_v1_PsGc_1023.ver1_0.g008490	0	hypothetical protein CHLNCDRAFT_138218	0	0	0	0	no IPS match	no IPS match	no IPS match
	VvCarFPS02VCR702_v1_PsGc_1023.ver1_0.g008500.m01	VvCarFPS02VCR702_v1_PsGc_1023.ver1_0.g008500	0	midasin	F:GO:0000166 | F:GO:0016787	F:nucleotide binding | F:hydrolase activity	EC:3.6.1.3 | EC:3.6.1.15	Adenosinetriphosphatase | Nucleoside-triphosphate phosphatase	G3DSA:3.40.50.300 (GENE3D) | G3DSA:3.40.50.300 (GENE3D) | IPR011704 (PFAM) | PTHR22908:SF66 (PANTHER) | PTHR22908 (PANTHER) | cd00009 (CDD) | IPR027417 (SUPERFAMILY) | IPR027417 (SUPERFAMILY)	F:GO:0016887 | F:GO:0005524	F:ATPase activity
	VvCarFPS02VCR702_v1_PsGc_1024.ver1_0.g008510.m01	VvCarFPS02VCR702_v1_PsGc_1024.ver1_0.g008510	0	Avr9 Cf-9 rapidly elicited	0	0	0	0	Coil (COILS) | IPR021864 (PFAM) | PTHR31371 (PANTHER) | PTHR31371:SF2 (PANTHER)	no GO terms	no GO terms
	VvCarFPS02VCR702_v1_PsGc_1024.ver1_0.g008520.m01	VvCarFPS02VCR702_v1_PsGc_1024.ver1_0.g008520	0	plant T32M21-140	0	0	0	0	IPR007700 (PFAM) | PTHR31371 (PANTHER) | PTHR31371:SF2 (PANTHER)	no GO terms	no GO terms
	VvCarFPS02VCR702_v1_PsGc_1024.ver1_0.g008530.m01	VvCarFPS02VCR702_v1_PsGc_1024.ver1_0.g008530	0	ethylene receptor 2-like	F:GO:0005515 | P:GO:0007165 | C:GO:0005737 | F:GO:0038023 | C:GO:0016020 | P:GO:0009719 | C:GO:0005783 | F:GO:0004872 | F:GO:0004871 | F:GO:0016301	F:protein binding | P:signal transduction | C:cytoplasm | F:signaling receptor activity | C:membrane | P:response to endogenous stimulus | C:endoplasmic reticulum | F:receptor activity | F:signal transducer activity | F:kinase activity	EC:2.7.13.3	Histidine kinase	Coil (COILS) | IPR003661 (SMART) | IPR001789 (SMART) | IPR003018 (SMART) | IPR003661 (PFAM) | IPR003018 (PFAM) | IPR014525 (PIRSF) | IPR036890 (G3DSA:3.30.565.GENE3D) | G3DSA:3.40.50.2300 (GENE3D) | G3DSA:1.10.287.130 (GENE3D) | IPR001789 (PFAM) | IPR029016 (G3DSA:3.30.450.GENE3D) | IPR003594 (PFAM) | PTHR43719:SF6 (PANTHER) | PTHR43719 (PANTHER) | IPR005467 (PROSITE_PROFILES) | IPR001789 (PROSIT…	F:GO:0000155 | C:GO:0005789 | F:GO:0005515 | F:GO:0051740 | P:GO:0007165 | P:GO:0000160 | F:GO:0038199 | P:GO:0010105 | F:GO:0004673 | P:GO:0050896	F:phosphorelay sensor kinase activity	F:protein binding	F:ethylene binding	P:signal transduction	P:phosphorelay signal transduction system	F:ethylene receptor activity	P:negative regulation of ethylene-activated signaling pathway	F:protein histidine kinase activity	P:response to stimulus
	VvCarFPS02VCR702_v1_PsGc_1024.ver1_0.g008540.m01	VvCarFPS02VCR702_v1_PsGc_1024.ver1_0.g008540	0	transcriptional regulator superman	F:GO:0003676	F:nucleic acid binding	0	0	IPR013087 (SMART) | G3DSA:3.30.160.60 (GENE3D) | PF13912 (PFAM) | mobidb-lite (MOBIDB_LITE) | mobidb-lite (MOBIDB_LITE) | PTHR26374:SF211 (PANTHER) | PTHR26374 (PANTHER) | IPR013087 (PROSITE_PATTERNS) | IPR013087 (PROSITE_PROFILES) | IPR036236 (SUPERFAMILY)	F:GO:0003676	F:nucleic acid binding
	VvCarFPS02VCR702_v1_PsGc_1024.ver1_0.g008550.m01	VvCarFPS02VCR702_v1_PsGc_1024.ver1_0.g008550	0	transcriptional regulator SUPERMAN-like	F:GO:0003676 | C:GO:0005634	F:nucleic acid binding | C:nucleus	0	0	IPR013087 (SMART) | PF13912 (PFAM) | G3DSA:3.30.160.60 (GENE3D) | mobidb-lite (MOBIDB_LITE) | PTHR26374 (PANTHER) | PTHR26374:SF248 (PANTHER) | IPR013087 (PROSITE_PATTERNS) | IPR013087 (PROSITE_PROFILES) | IPR036236 (SUPERFAMILY)	F:GO:0003676	F:nucleic acid binding
	VvCarFPS02VCR702_v1_PsGc_1025.ver1_0.g008560.m01	VvCarFPS02VCR702_v1_PsGc_1025.ver1_0.g008560	0	GRAS family transcription factor	0	0	0	0	no IPS match	no IPS match	no IPS match
	VvCarFPS02VCR702_v1_PsGc_1026.ver1_0.g008570.m01	VvCarFPS02VCR702_v1_PsGc_1026.ver1_0.g008570	0	transparent testa	P:GO:0009058 | F:GO:0016740 | F:GO:0005488 | C:GO:0005730 | P:GO:0006139	P:biosynthetic process | F:transferase activity | F:binding | C:nucleolus | P:nucleobase-containing compound metabolic process	EC:2.7.7.6	DNA-directed RNA polymerase	IPR036898 (G3DSA:3.30.1490.GENE3D) | IPR008972 (G3DSA:2.60.40.GENE3D) | IPR011707 (PFAM) | PTHR11709:SF118 (PANTHER) | PTHR11709 (PANTHER) | IPR008972 (SUPERFAMILY)	F:GO:0003899 | F:GO:0005507 | P:GO:0006351	F:DNA-directed 5'-3' RNA polymerase activity	P:transcription, DNA-templated
	VvCarFPS02VCR702_v1_PsGc_1026.ver1_0.g008580.m01	VvCarFPS02VCR702_v1_PsGc_1026.ver1_0.g008580	0	ABC transporter-like family-	F:GO:0000166 | F:GO:0016787	F:nucleotide binding | F:hydrolase activity	EC:3.6.1.3 | EC:3.6.1.15	Adenosinetriphosphatase | Nucleoside-triphosphate phosphatase	IPR003439 (PFAM) | G3DSA:3.40.50.300 (GENE3D) | mobidb-lite (MOBIDB_LITE) | mobidb-lite (MOBIDB_LITE) | PTHR24223 (PANTHER) | PTHR24223:SF108 (PANTHER) | IPR027417 (SUPERFAMILY)	F:GO:0016887 | F:GO:0005524	F:ATPase activity
	VvCarFPS02VCR702_v1_PsGc_1026.ver1_0.g008590.m01	VvCarFPS02VCR702_v1_PsGc_1026.ver1_0.g008590	0	Formin 6	0	0	0	0	no IPS match	no IPS match	no IPS match
	VvCarFPS02VCR702_v1_PsGc_1026.ver1_0.g008600.m01	VvCarFPS02VCR702_v1_PsGc_1026.ver1_0.g008600	0	disease resistance gene NBS-LRR family	F:GO:0000166	F:nucleotide binding	0	0	Coil (COILS) | PR00364 (PRINTS) | G3DSA:3.40.50.300 (GENE3D) | G3DSA:1.10.8.430 (GENE3D) | IPR002182 (PFAM) | PTHR44061:SF1 (PANTHER) | PTHR44061 (PANTHER) | IPR027417 (SUPERFAMILY)	F:GO:0043531	F:ADP binding
	VvCarFPS02VCR702_v1_PsGc_1026.ver1_0.g008610.m01	VvCarFPS02VCR702_v1_PsGc_1026.ver1_0.g008610	0	disease resistance (CC-NBS-LRR class) family	0	0	0	0	IPR032675 (G3DSA:3.80.10.GENE3D) | IPR032675 (G3DSA:3.80.10.GENE3D) | PTHR44061 (PANTHER) | SSF52058 (SUPERFAMILY)	no GO terms	no GO terms
	VvCarFPS02VCR702_v1_PsGc_1027.ver1_0.g008620.m01	VvCarFPS02VCR702_v1_PsGc_1027.ver1_0.g008620	0	Ubiquitin-conjugating enzyme E2 5	F:GO:0000166	F:nucleotide binding	0	0	SM00212 (SMART) | IPR016135 (G3DSA:3.10.110.GENE3D) | IPR000608 (PFAM) | PTHR43946 (PANTHER) | PTHR43946:SF1 (PANTHER) | IPR023313 (PROSITE_PATTERNS) | IPR000608 (PROSITE_PROFILES) | IPR000608 (CDD) | IPR016135 (SUPERFAMILY)	no GO terms	no GO terms
	VvCarFPS02VCR702_v1_PsGc_1027.ver1_0.g008630.m01	VvCarFPS02VCR702_v1_PsGc_1027.ver1_0.g008630	0	uncharacterized protein LOC109706523	0	0	0	0	PTHR13902:SF23 (PANTHER) | PTHR13902 (PANTHER)	no GO terms	no GO terms
	VvCarFPS02VCR702_v1_PsGc_1027.ver1_0.g008640.m01	VvCarFPS02VCR702_v1_PsGc_1027.ver1_0.g008640	0	Serine threonine- kinase WNK (With No Lysine)	C:GO:0005829	C:cytosol	0	0	IPR025610 (PFAM) | PTHR13902 (PANTHER) | PTHR13902:SF23 (PANTHER) | TMhelix (TMHMM)	no GO terms	no GO terms
	VvCarFPS02VCR702_v1_PsGc_1028.ver1_0.g008650.m01	VvCarFPS02VCR702_v1_PsGc_1028.ver1_0.g008650	0	hypothetical protein L484_026358	0	0	0	0	mobidb-lite (MOBIDB_LITE)	no GO terms	no GO terms
	VvCarFPS02VCR702_v1_PsGc_1028.ver1_0.g008660.m01	VvCarFPS02VCR702_v1_PsGc_1028.ver1_0.g008660	0	F-box kelch-repeat At1g57790-like	0	0	0	0	mobidb-lite (MOBIDB_LITE)	no GO terms	no GO terms
	VvCarFPS02VCR702_v1_PsGc_1028.ver1_0.g008670.m01	VvCarFPS02VCR702_v1_PsGc_1028.ver1_0.g008670	0	disease resistance RPM1-like	F:GO:0000166	F:nucleotide binding	0	0	IPR002182 (PFAM) | G3DSA:3.40.50.300 (GENE3D) | PTHR43886 (PANTHER) | PTHR43886:SF13 (PANTHER) | IPR027417 (SUPERFAMILY)	F:GO:0043531	F:ADP binding
	VvCarFPS02VCR702_v1_PsGc_1028.ver1_0.g008680.m01	VvCarFPS02VCR702_v1_PsGc_1028.ver1_0.g008680	0	Disease resistance (CC-NBS-LRR class) family	0	0	0	0	IPR032675 (G3DSA:3.80.10.GENE3D) | PTHR43886:SF13 (PANTHER) | PTHR43886 (PANTHER) | SSF52058 (SUPERFAMILY)	no GO terms	no GO terms
	VvCarFPS02VCR702_v1_PsGc_1028.ver1_0.g008690.m01	VvCarFPS02VCR702_v1_PsGc_1028.ver1_0.g008690	0	guanine nucleotide exchange family	0	0	0	0	IPR032629 (PFAM) | mobidb-lite (MOBIDB_LITE) | mobidb-lite (MOBIDB_LITE) | PTHR10663:SF108 (PANTHER) | PTHR10663 (PANTHER)	no GO terms	no GO terms
	VvCarFPS02VCR702_v1_PsGc_1028.ver1_0.g008700.m01	VvCarFPS02VCR702_v1_PsGc_1028.ver1_0.g008700	0	myosin-binding 2-like	0	0	0	0	Coil (COILS) | IPR007656 (PFAM) | PTHR31422 (PANTHER) | PTHR31422:SF2 (PANTHER) | IPR007656 (PROSITE_PROFILES) | TMhelix (TMHMM) | TMhelix (TMHMM) | TMhelix (TMHMM)	no GO terms	no GO terms
	VvCarFPS02VCR702_v1_PsGc_1028.ver1_0.g008710.m01	VvCarFPS02VCR702_v1_PsGc_1028.ver1_0.g008710	0	polyadenylate-binding -interacting 7-like isoform X1	0	0	0	0	PTHR13308:SF29 (PANTHER) | PTHR13308 (PANTHER) | SignalP-noTM (SIGNALP_EUK)	no GO terms	no GO terms
	VvCarFPS02VCR702_v1_PsGc_1028.ver1_0.g008720.m01	VvCarFPS02VCR702_v1_PsGc_1028.ver1_0.g008720	0	methylmalonate-semialdehyde dehydrogenase [acylating] mitochondrial-like isoform X1	P:GO:0005975 | F:GO:0003824 | P:GO:0009056 | P:GO:0044763 | P:GO:0009987 | P:GO:0044723 | P:GO:0044712	P:carbohydrate metabolic process | F:catalytic activity | P:catabolic process | P:single-organism cellular process | P:cellular process | P:single-organism carbohydrate metabolic process | P:single-organism catabolic process	EC:1.2.1.27	Methylmalonate-semialdehyde dehydrogenase (CoA acylating)	IPR016162 (G3DSA:3.40.605.GENE3D) | IPR015590 (PFAM) | PTHR43866:SF6 (PANTHER) | IPR010061 (PANTHER) | IPR016161 (SUPERFAMILY)	F:GO:0016491 | P:GO:0008152 | F:GO:0004491 | P:GO:0055114	F:oxidoreductase activity	F:methylmalonate-semialdehyde dehydrogenase (acylating) activity	P:oxidation-reduction process
	VvCarFPS02VCR702_v1_PsGc_1028.ver1_0.g008730.m01	VvCarFPS02VCR702_v1_PsGc_1028.ver1_0.g008730	0	methylmalonate-semialdehyde dehydrogenase [acylating] mitochondrial-like isoform X1	P:GO:0005975 | F:GO:0003824 | P:GO:0009056 | P:GO:0044763 | P:GO:0009987 | P:GO:0044723 | P:GO:0044712	P:carbohydrate metabolic process | F:catalytic activity | P:catabolic process | P:single-organism cellular process | P:cellular process | P:single-organism carbohydrate metabolic process | P:single-organism catabolic process	EC:1.2.1.27	Methylmalonate-semialdehyde dehydrogenase (CoA acylating)	IPR015590 (PFAM) | IPR016163 (G3DSA:3.40.309.GENE3D) | IPR010061 (PANTHER) | PTHR43866:SF5 (PANTHER) | IPR016161 (SUPERFAMILY)	F:GO:0016491 | P:GO:0008152 | F:GO:0004491 | P:GO:0055114 | F:GO:0016620	F:oxidoreductase activity	F:methylmalonate-semialdehyde dehydrogenase (acylating) activity	P:oxidation-reduction process	F:oxidoreductase activity, acting on the aldehyde or oxo group of donors, NAD or NADP as acceptor
	VvCarFPS02VCR702_v1_PsGc_1028.ver1_0.g008740.m01	VvCarFPS02VCR702_v1_PsGc_1028.ver1_0.g008740	0	calnexin homolog	0	0	0	0	PS51257 (PROSITE_PROFILES) | TMhelix (TMHMM)	no GO terms	no GO terms
[truncated: 72,244 more rows]
[truncated: 5 more columns]
